# Supplementary material for: Multi-variable parameter estimation for a global hydrological model: Comparison and evaluation of three ensemble-based calibration methods for the Mississippi River basin
Source: Copernicus journal article supplement (doi:10.5194/hess-2023-18), 2023-05-11
Supplement: Supplementary file 2 [file hess-2023-18-supplement.zip]

Archive with 2 entries (2 files):
- Doell_et_al_Supplement.xlsx
- Doell_et_al_Supplement_Text_Fig.pdf
