# Supplementary material for: Multi-variable parameter estimation for a global hydrological model: Comparison and evaluation of three ensemble-based calibration methods for the Mississippi River basin
Source: Copernicus journal article supplement (doi:10.5194/hess-2023-18), 2023-05-11
Supplement: Supplementary file 2 [file hess-2023-18-supplement.zip › Doell_et_al_Supplement.xlsx]

## Sheet: Readme
		Supplement of
		Multi-variable parameter estimation for a global hydrological model: Comparison and evaluation of three ensemble-based calibration methods for the Mississippi River basin
		Petra Döll et al.
		Correspondence to: Petra Döll (p.doell@em.uni-frankfurt.de)
		This Excel file provides, for each of the six CDA units, information on the behavioral parameter sets for WaterGAP that were identified by the three calibration approaches EnCDA, POC and GLUE. The number of behavioral parameter sets are provided in Table 4 of Döll et al.
		In each table, one per CDA unit, the values of the calibration parameters as well as the corresponding performance metrics of WaterGAP when applying this parameter set are listed. The performance metrics include NSE, KGE and three KGE components regarding both streamflow (Q) and total water storage anomaly (TWSA) for the calibration period 2003-2012.
		At the top of each table, you find the parameter sets of the compromise solutions (corresponding to Table 3 in Döll et al.)

## Sheet: Arkansas
COMPROMISE SOLUTIONS
		Metrics regarding Q					Metrics regarding TWSA				Parameter values (names and units based on Table 2; values of non-disturbed parameters are included in Table 2)
		NSE	KGE	CC	RBias	RVar	NSE	KGE	CC	RVar	EP-PTh	SN-MT	SL-MSM	SL-RC	SL-MEP	GW-MM	SW-LD	SW-WD	SW-DC	NA-GM
EnCDA		0.58715	0.58763	0.77232	1.0386	0.65837	0.84287	0.84665	0.94077	1.1415	1.62539	1.22809	2.89892	2.58182	21.4518	2.85688	6.13603	18.4996	0.00137877	1.32769
POC		0.740453	0.539084	0.903976	1.18073	0.587012	0.853649	0.912586	0.932076	1.05502	1.0627	2.53302	2.06253	2.99516	12.2041	0.300057	1.12576	1.00915	0.099389	0.241701
GLUE		0.685735	0.441755	0.903332	1.30959	0.545634	0.826541	0.830893	0.936201	1.15661	0.98395	2.96675	1.91866	2.81029	20.9661	0.4798	5.3411	4.9361	0.0699252	0.483576
BEHAVIORAL SOLUTIONS (all behavioral solutions for each methodology)
		Metrics regarding Q					Metrics regarding TWSA				Parameter values (names and units based on Table 2; values of non-disturbed parameters are included in Table 2)
	Sl. No.	NSE	KGE	CC	RBias	RVar	NSE	KGE	CC	RVar	EP-PTh	SN-MT	SL-MSM	SL-RC	SL-MEP	GW-MM	SW-LD	SW-WD	SW-DC	NA-GM
EnCDA	1	0.60628	0.63162	0.7822	1.0722	0.71181	0.75088	0.81497	0.90418	1.1583	1.61995	1.58588	2.88215	2.61399	21.3991	2.85324	5.32547	18.2979	0.00148782	1.19486
	2	0.60792	0.64237	0.78662	0.9633	0.71536	0.75691	0.85507	0.89506	1.1	1.6049	0.40508	2.82197	2.85623	21.1557	2.73637	2.79263	18.0101	0.00181949	0.905361
	3	0.61057	0.65387	0.78254	1.0352	0.73302	0.79057	0.84049	0.91735	1.1364	1.61494	0.844056	2.85894	2.79315	21.3034	2.78519	3.35725	19.0743	0.00161593	1.16822
	4	0.60706	0.68257	0.77935	1.017	0.77244	0.7371	0.82095	0.89598	1.1457	1.60968	-1.1173	2.8388	2.84383	21.2026	2.76851	2.97154	19.2209	0.0017001	1.22541
	5	0.60566	0.63817	0.78211	0.99105	0.71127	0.71065	0.759	0.90279	1.2205	1.61783	0.998967	2.86869	2.72749	21.3412	2.79606	3.42882	18.9695	0.00155925	1.48363
POC	1	0.733053	0.511236	0.907373	1.23692	0.58265	0.860454	0.921147	0.934007	1.04316	1.03047	0.879599	2.07185	2.998	11.1176	0.30001	1.16702	1.01148	0.0992978	0.244898
	2	0.737932	0.524535	0.906768	1.20237	0.579972	0.857066	0.918077	0.932777	1.04682	1.06269	2.55136	2.08728	2.99698	10.4584	0.300008	1.12558	1.01584	0.0992446	0.244903
	3	0.691584	0.45355	0.901468	1.27281	0.536885	0.875006	0.926041	0.941142	1.04478	1.014	-1.72293	2.07085	2.99784	11.075	0.300459	1.87663	18.7028	0.00100204	0.2053
	4	0.740453	0.539084	0.903976	1.18073	0.587012	0.853649	0.912586	0.932076	1.05502	1.0627	2.53302	2.06253	2.99516	12.2041	0.300057	1.12576	1.00915	0.099389	0.241701
	5	0.722221	0.494271	0.906357	1.26314	0.578393	0.865115	0.931257	0.934015	1.01928	1.01431	-1.72046	2.06813	2.99519	11.1528	0.300522	1.16385	1.00911	0.0992897	0.269937
	6	0.626516	0.356246	0.911803	1.42309	0.522885	0.885011	0.930816	0.945757	1.04294	0.957555	1.91804	1.94001	2.99806	10.3974	0.300241	16.7827	19.6799	0.00100017	0.20146
	7	0.669482	0.417307	0.903295	1.31087	0.516741	0.880103	0.925077	0.944083	1.04987	1.00113	-1.71393	2.07083	2.9991	10.3765	0.300414	16.6538	19.8281	0.00100024	0.205195
	8	0.703042	0.473007	0.901447	1.24474	0.543807	0.870923	0.920355	0.939974	1.05235	1.02654	-0.702124	2.0709	2.99681	10.8214	0.300536	1.31435	16.7479	0.00100003	0.192132
GLUE	1	0.610327	0.35381	0.89713	1.31999	0.448106	0.791872	0.885948	0.904721	1.06269	1.08704	-2.35319	1.47379	2.69701	8.21962	0.96369	2.50712	14.0684	0.0590528	0.796147
	2	0.617885	0.35251	0.903765	1.33776	0.456034	0.809551	0.845368	0.900387	0.881728	1.09526	1.89554	1.11736	2.69023	14.5886	1.9075	15.4195	1.20295	0.0815034	0.301739
	3	0.601606	0.318672	0.916724	1.37152	0.434984	0.776132	0.803906	0.882168	0.843257	1.13447	0.278917	1.73652	1.38728	14.8815	0.92673	2.02998	6.3204	0.0953014	0.0025124
	4	0.612626	0.397481	0.887675	1.16405	0.431228	0.802401	0.886086	0.897693	0.949903	1.20766	0.264393	2.20421	2.33637	10.6575	0.959832	8.6692	4.2865	0.0306486	-0.501658
	5	0.668014	0.46199	0.887029	1.16707	0.501221	0.718636	0.85996	0.867013	1.04388	1.2258	0.71195	1.19487	2.13533	15.5151	0.392761	14.8275	2.68332	0.0608776	0.810664
	6	0.602604	0.401688	0.862232	1.2002	0.453265	0.767118	0.799381	0.916362	1.18235	1.08786	-0.491022	2.08717	1.5274	21.0973	0.812576	10.51	19.1578	0.0977164	0.74685
	7	0.661959	0.45942	0.883054	1.16655	0.499188	0.811178	0.906218	0.907492	1.01541	1.08935	1.48961	1.89314	2.57113	16.9398	0.952892	14.2991	7.04349	0.0904085	0.0304429
	8	0.698845	0.469611	0.903172	1.20979	0.522583	0.784739	0.893696	0.894248	1.01082	1.12021	0.262951	1.32513	2.2899	21.1116	0.482666	17.4902	1.85271	0.0829154	0.591737
	9	0.60211	0.418529	0.853435	1.16483	0.461985	0.784423	0.800876	0.923975	1.18404	1.07357	0.905028	1.8401	2.28505	21.5999	1.99248	3.88113	12.9049	0.0864869	0.596785
	10	0.611019	0.371818	0.890483	1.2536	0.435813	0.770024	0.803171	0.87867	0.845013	1.2072	-0.281136	1.05794	1.99131	21.408	1.12903	10.2205	11.7585	0.0907503	0.313162
	11	0.606902	0.363843	0.88968	1.27848	0.438773	0.705527	0.725608	0.843054	0.774925	1.2682	1.70755	1.05074	2.07362	15.8142	1.29098	6.01329	4.55378	0.0793144	-0.0671585
	12	0.605769	0.342664	0.899476	1.37577	0.47011	0.726725	0.862679	0.871798	1.0492	1.08246	-1.54818	1.1747	2.02822	12.8631	0.460652	8.83293	17.4066	0.0375307	0.881674
	13	0.622126	0.372881	0.891806	1.33127	0.478623	0.840614	0.873006	0.933998	1.10849	1.00026	1.31985	1.97599	2.05905	15.0488	1.10155	4.47071	8.10595	0.0967984	0.474159
	14	0.630603	0.363901	0.911918	1.28969	0.440587	0.761014	0.792948	0.873487	0.836095	1.22528	-0.323183	1.87845	2.11885	10.6482	0.450125	7.13266	1.91678	0.0498114	-0.73476
	15	0.619005	0.421796	0.870971	1.15935	0.459372	0.794946	0.89618	0.901667	1.0333	1.1225	3.27582	2.0512	2.12745	20.6706	1.48524	3.27386	6.98197	0.0156305	-0.135752
	16	0.6112	0.368739	0.890828	1.26942	0.439659	0.77028	0.879997	0.883128	0.972764	1.17999	-0.438027	0.969879	2.65271	12.0957	1.90013	4.64439	4.22628	0.0465102	0.747156
	17	0.611387	0.419927	0.861392	1.17064	0.463199	0.758582	0.787264	0.872618	0.829616	1.28165	-0.373526	0.883578	2.67382	20.2112	0.936817	3.13213	5.10963	0.0113563	0.406493
	18	0.638706	0.467809	0.882204	1.05963	0.484446	0.824789	0.911759	0.915433	1.0252	1.23119	3.70619	1.68576	2.59279	11.4766	1.00606	7.82843	3.41044	0.0668533	0.400782
	19	0.610151	0.525428	0.846965	0.945768	0.554066	0.785461	0.804793	0.923352	1.17953	1.16719	0.182932	2.30519	2.40951	21.0502	0.587669	9.41624	5.71582	0.0852032	0.460176
	20	0.608705	0.356658	0.89821	1.28267	0.43112	0.798802	0.868977	0.89454	0.922249	1.10612	-1.47528	1.99311	1.72836	16.4249	0.966793	11.2476	11.2276	0.0500496	-0.178483
	21	0.621698	0.377616	0.892892	1.27051	0.449805	0.830891	0.913925	0.914985	0.98653	1.10097	1.97173	1.27335	2.85718	13.2567	1.33466	10.3603	13.367	0.0518659	0.448573
	22	0.61137	0.362402	0.892057	1.3041	0.450091	0.707898	0.790056	0.890636	1.17921	1.04304	-1.73226	1.41458	2.71369	11.6528	1.14833	6.38774	17.4336	0.0566963	0.903612
	23	0.613938	0.367226	0.901452	1.24174	0.423587	0.752855	0.767989	0.870314	0.807618	1.35302	1.42693	1.56494	1.34352	12.8884	0.821112	3.49784	2.97398	0.0997882	0.205046
	24	0.630601	0.390591	0.89469	1.24266	0.450994	0.80539	0.874529	0.915613	1.09285	1.10898	1.71305	1.89993	1.4437	18.5195	1.10679	13.0532	2.82595	0.0516533	0.701369
	25	0.633061	0.382244	0.897587	1.28733	0.462808	0.790249	0.823945	0.889868	0.862646	1.13713	-1.72383	1.21925	1.91311	21.6316	0.652643	3.36293	14.4642	0.0672511	0.336681
	26	0.64262	0.448778	0.877262	1.14185	0.481675	0.777171	0.864179	0.903154	1.09523	1.14239	-2.79514	1.53193	2.5564	15.4007	0.673245	10.4789	12.9295	0.0749525	0.742157
	27	0.623676	0.367309	0.89696	1.3482	0.481887	0.853849	0.915171	0.932216	1.051	0.984803	-2.83081	1.78654	2.42238	21.3532	0.89254	15.5642	7.90477	0.088573	0.451746
	28	0.627858	0.430919	0.879502	1.13386	0.460172	0.741706	0.867408	0.880168	1.05675	1.21108	-0.0997811	1.18311	2.38718	16.6588	1.11469	19.0683	2.21358	0.0226921	0.769243
	29	0.601834	0.327561	0.91079	1.34899	0.432176	0.755083	0.858765	0.892496	1.0916	1.0789	0.343182	1.48428	1.46566	17.8162	1.2478	6.7096	9.07846	0.0474226	0.877307
	30	0.60298	0.4395	0.876516	1.03762	0.454568	0.765653	0.79575	0.876268	0.837493	1.46166	0.0385343	1.69409	2.64338	7.98282	0.515564	4.93596	2.83835	0.0114408	-0.165473
	31	0.609449	0.410081	0.880435	1.13115	0.43741	0.838274	0.876027	0.93232	1.10387	1.15304	1.84051	1.89039	2.47423	10.2392	1.32524	4.64087	18.5356	0.00845416	0.495235
	32	0.622587	0.414741	0.887009	1.14359	0.443994	0.7534	0.815519	0.868427	0.870687	1.26249	1.90849	1.25739	2.00918	20.384	1.34965	18.93	4.04844	0.0910197	0.176788
	33	0.607502	0.358451	0.893181	1.29428	0.440025	0.786789	0.818285	0.888131	0.856802	1.19771	1.19873	0.994654	2.0898	17.919	1.29232	15.581	7.33849	0.0990676	0.424404
	34	0.601774	0.377141	0.877147	1.24238	0.439544	0.776148	0.784286	0.88398	0.818144	1.28865	-2.94843	1.25891	1.4745	17.7477	0.480658	6.82159	12.7088	0.0939314	0.494962
	35	0.619001	0.344959	0.910337	1.35026	0.45378	0.732103	0.846232	0.883801	1.10071	1.12731	3.23682	1.28007	1.90283	10.8563	1.21514	1.17504	3.17247	0.0357503	0.952049
	36	0.608278	0.361738	0.896246	1.26316	0.427847	0.794131	0.871177	0.892307	0.929307	1.14803	2.28417	1.85237	1.3631	20.7218	1.49498	13.5088	4.63784	0.0764636	0.162604
	37	0.600812	0.329651	0.906827	1.35691	0.440269	0.725649	0.796819	0.897262	1.17529	1.06727	1.71234	1.57668	2.25419	8.67775	0.965898	8.63286	15.7035	0.0757462	0.926978
	38	0.677544	0.440227	0.903363	1.21657	0.492946	0.814778	0.897901	0.904873	0.96292	1.1135	3.21112	1.79085	2.51911	11.7503	1.04841	5.4375	1.46844	0.0636635	0.012479
	39	0.647538	0.487367	0.883373	1.03708	0.502189	0.715836	0.809292	0.847288	0.885771	1.27328	0.402897	1.50513	2.72504	20.1599	0.961008	1.01024	1.46156	0.0622379	-0.277575
	40	0.616756	0.388361	0.888546	1.21313	0.437634	0.829532	0.90091	0.912264	0.953942	1.16062	0.427231	1.68082	1.93165	12.4508	0.751103	17.8291	17.5984	0.08548	0.278853
	41	0.608264	0.461734	0.866034	1.02306	0.479182	0.807757	0.904238	0.906387	1.02017	1.21091	0.434672	2.26	2.91211	10.7584	0.897041	7.71341	6.45595	0.0211494	-0.243163
	42	0.617374	0.373887	0.896714	1.24651	0.4338	0.743031	0.809867	0.901778	1.1628	1.12661	-0.62446	2.07687	1.44902	12.5292	0.848481	10.398	8.31555	0.0509484	0.932604
	43	0.617413	0.385332	0.883471	1.25701	0.453939	0.833259	0.898227	0.924562	1.06831	1.08627	1.46826	2.71491	2.51798	10.1004	0.9896	14.9838	2.30034	0.00120964	-0.4797
	44	0.610163	0.441112	0.873963	1.06045	0.458875	0.827935	0.904725	0.911923	0.963672	1.27596	-0.805433	2.06493	2.25458	9.34564	0.373067	12.6742	18.1932	0.0954185	0.182682
	45	0.61854	0.36839	0.893073	1.3722	0.501036	0.790562	0.797505	0.891836	0.828814	1.08624	-1.04629	1.04627	2.52797	14.928	0.478167	4.35531	9.67301	0.0789225	0.347009
	46	0.619102	0.375483	0.903689	1.22007	0.423531	0.729355	0.832387	0.887387	1.12415	1.23855	1.29607	1.77801	1.40097	11.8329	1.12062	4.86648	2.31339	0.0550501	1.00994
	47	0.60687	0.385666	0.879773	1.21502	0.437223	0.831228	0.91628	0.917092	1.01163	1.09071	0.338471	1.95203	1.90891	15.1956	2.16608	8.85227	7.83261	0.00161862	0.157208
	48	0.64428	0.409243	0.902635	1.19269	0.450105	0.828029	0.912892	0.913734	0.987917	1.21713	0.50513	1.69341	1.87764	10.0638	0.599383	3.58885	9.3272	0.0290925	0.572049
	49	0.603952	0.405159	0.879988	1.12901	0.431855	0.78685	0.894329	0.89681	1.02276	1.25572	0.405006	1.59158	1.49691	19.1265	0.70121	16.7724	14.473	0.0988983	0.665124
	50	0.603535	0.363697	0.883464	1.30134	0.451826	0.843906	0.899599	0.930171	1.07214	1.00807	0.452139	1.5722	2.90613	21.1863	1.94258	2.63238	19.866	0.0285302	0.352991
	51	0.610344	0.334364	0.909856	1.38008	0.461034	0.831281	0.899026	0.912876	0.94896	1.01379	0.541493	1.5884	1.83411	19.7757	1.49801	1.94381	3.91362	0.0346235	0.238509
	52	0.614372	0.382523	0.882344	1.26078	0.452801	0.824792	0.876762	0.908741	0.917179	1.11487	-3.70922	1.33532	2.24469	18.2164	1.48464	2.54746	3.2653	0.00995864	0.498323
	53	0.631259	0.437467	0.884887	1.1096	0.460389	0.70325	0.807146	0.882356	1.15282	1.22196	-0.19572	1.53658	2.25207	10.7566	0.900777	12.5875	6.9456	0.0976866	0.897282
	54	0.60244	0.3298	0.907221	1.36895	0.448244	0.752989	0.772655	0.869872	0.81358	1.08479	-0.529929	1.12419	2.81541	16.2766	1.73293	3.4175	6.10219	0.0575388	-0.105865
	55	0.640316	0.415946	0.889652	1.20165	0.463082	0.78013	0.83871	0.883598	0.888352	1.15409	-1.66283	1.57982	2.90859	13.486	0.750327	8.54018	13.0308	0.0913579	-0.293463
	56	0.623535	0.413535	0.87902	1.17914	0.454826	0.81257	0.899703	0.904425	0.969587	1.16887	3.03479	1.1538	2.8992	21.2833	1.39912	17.6915	3.64829	0.00504306	0.413473
	57	0.619192	0.394798	0.877889	1.25031	0.462688	0.760589	0.879478	0.879919	0.989695	1.33025	3.26572	1.14758	2.12649	8.54908	0.706666	5.98087	1.65654	0.0858181	0.852079
	58	0.64258	0.403127	0.897319	1.2323	0.459862	0.782171	0.849206	0.884938	0.902535	1.10971	-0.438674	1.41859	2.64185	19.1908	1.20492	5.77712	11.68	0.0307778	-0.0765554
	59	0.609669	0.346528	0.901813	1.33314	0.446463	0.769347	0.793152	0.878664	0.832478	1.10316	-1.33522	1.27402	2.59385	14.3764	0.855916	14.8335	14.5443	0.0738553	-0.11352
	60	0.616951	0.44883	0.870071	1.0713	0.469129	0.785467	0.872333	0.888115	0.938513	1.18927	-2.06104	1.54797	2.73108	19.9671	0.842124	16.3111	17.7352	0.0316046	0.0965967
	61	0.635072	0.450296	0.867854	1.14166	0.485565	0.836656	0.858174	0.935044	1.12608	1.08312	2.60743	2.03469	2.97837	13.4855	1.00444	7.04264	17.9865	0.0347146	0.266981
	62	0.629031	0.390281	0.889386	1.26688	0.463066	0.812648	0.89781	0.903918	0.9652	1.04861	-0.129207	1.65065	2.44087	17.9378	1.86075	16.766	2.99897	0.0574616	0.0494248
	63	0.640272	0.41626	0.892946	1.18652	0.457319	0.822858	0.891558	0.908261	0.942177	1.17416	2.82926	1.36246	2.69776	11.8242	1.50835	15.2054	2.4986	0.0456402	0.305196
	64	0.629099	0.380705	0.89691	1.2741	0.454317	0.776971	0.861456	0.903899	1.0998	1.05963	-1.06315	1.42077	2.26173	17.7516	1.1461	5.11964	15.7276	0.038959	0.71264
	65	0.662828	0.449252	0.895127	1.15423	0.481795	0.830858	0.915226	0.918072	1.02178	1.13726	-0.831793	1.77549	2.128	12.5504	0.884266	15.6013	2.41506	0.0519416	0.472861
	66	0.630975	0.369616	0.90227	1.32806	0.470652	0.713699	0.793327	0.8924	1.17645	1.03095	-2.46427	1.57641	2.47544	10.7515	0.837786	10.493	8.80702	0.0977878	0.94696
	67	0.608515	0.418813	0.878791	1.10521	0.441416	0.838298	0.918117	0.922069	1.02513	1.19412	1.98883	1.53361	2.86989	11.0663	1.17857	11.7743	16.8518	0.0093259	0.399487
	68	0.623952	0.37156	0.90245	1.26367	0.43795	0.81866	0.869205	0.905273	0.909811	1.12544	-0.417725	1.53623	1.86812	13.4918	1.40599	7.12988	4.60792	0.039298	0.273167
	69	0.620751	0.402221	0.881842	1.20054	0.449397	0.741826	0.872658	0.875473	1.02663	1.39124	2.82389	1.23124	2.05188	8.26668	0.67039	12.0155	1.05974	0.0572749	0.92594
	70	0.617509	0.447508	0.859941	1.10674	0.476323	0.790192	0.893763	0.899517	1.03449	1.13121	0.748278	2.12476	2.3783	21.7308	1.4723	6.69692	6.60493	0.0832471	-0.229719
	71	0.607642	0.357775	0.892912	1.30196	0.4434	0.838197	0.919787	0.92048	1.01052	1.06414	2.19904	1.78784	1.68436	19.9366	1.02	15.0033	14.3511	0.052435	0.329719
	72	0.637298	0.423416	0.887473	1.16867	0.460245	0.776338	0.864881	0.882873	0.932633	1.14416	1.83681	1.43487	2.64383	19.3828	1.98493	10.5827	2.53087	0.0166209	0.0109419
	73	0.604101	0.375055	0.891511	1.20353	0.419172	0.805596	0.890687	0.900047	0.955743	1.25508	2.48968	1.2366	1.82983	14.4011	1.30996	13.3276	7.49657	0.0452787	0.609459
	74	0.605194	0.343608	0.898245	1.37143	0.468461	0.773826	0.811934	0.916046	1.16829	0.98263	2.41802	1.45394	2.9468	18.9746	1.43538	16.9307	9.47488	0.0913396	0.706708
	75	0.606906	0.380739	0.887199	1.20704	0.427379	0.763953	0.7977	0.91545	1.18378	1.15238	3.0974	1.85361	2.08243	9.2218	1.58155	18.2917	1.518	0.00706848	0.859791
	76	0.647667	0.38067	0.912013	1.29348	0.461763	0.786699	0.845048	0.887325	0.89363	1.12512	1.40363	1.7312	1.61922	16.151	0.944942	1.76142	4.85282	0.0904342	0.0388346
	77	0.619399	0.479908	0.868723	1.00844	0.496819	0.7489	0.827968	0.899126	1.13935	1.23513	2.38293	1.59514	2.93242	12.052	1.11879	5.43379	4.31111	0.0822245	0.699094
	78	0.630631	0.383759	0.899266	1.25316	0.447266	0.825422	0.904572	0.910909	0.965806	1.14956	0.553919	1.3452	2.17614	11.7794	0.708813	8.6656	13.6466	0.0142397	0.529575
	79	0.610872	0.337432	0.909733	1.34935	0.444302	0.765937	0.873895	0.893248	1.06713	1.10034	2.93125	1.26321	1.76588	17.5364	1.28278	6.6601	8.93242	0.0911556	0.812134
	80	0.611189	0.365754	0.893303	1.27236	0.437238	0.838589	0.918868	0.921835	1.02174	1.09167	1.23523	1.84145	1.47839	18.7872	1.00677	10.935	6.13127	0.00693058	0.483991
	81	0.601234	0.351498	0.891519	1.30955	0.440564	0.826367	0.839183	0.9106	0.866323	1.12618	-2.7679	1.26115	2.62434	9.82869	1.35119	13.307	4.0255	0.0578015	0.42175
	82	0.637218	0.44265	0.890779	1.09808	0.462328	0.794727	0.88705	0.894363	0.960018	1.2571	3.46328	2.13669	1.35405	20.4019	0.580415	8.22324	3.77169	0.0462292	0.252458
	83	0.622823	0.348721	0.909636	1.36786	0.470211	0.787853	0.791834	0.890627	0.822882	1.12791	-0.722554	1.2346	1.67087	14.6181	0.700448	5.23315	3.34349	0.0640912	0.344521
	84	0.625763	0.435929	0.879903	1.10968	0.459886	0.780697	0.830111	0.914572	1.14685	1.15026	1.672	1.69564	2.33917	14.2065	1.08472	15.5679	10.3509	0.0226375	0.680573
	85	0.637296	0.488088	0.860173	1.06791	0.51226	0.810554	0.888466	0.914389	1.07149	1.11935	-0.20852	2.31459	2.51398	14.2527	0.93498	18.2199	4.55807	0.0745187	0.0617223
	86	0.633515	0.414869	0.887466	1.18439	0.456202	0.843269	0.918431	0.920866	0.980217	1.17993	-2.09631	1.74327	2.28441	9.51432	0.527679	8.24036	16.8676	0.091803	0.4724
	87	0.609613	0.358773	0.890866	1.35388	0.476521	0.850864	0.891723	0.9353	1.08682	0.985058	1.74753	2.20935	2.55503	11.2196	0.881258	1.49846	18.447	0.0488091	0.165966
	88	0.627579	0.408935	0.886014	1.18725	0.451089	0.724849	0.782596	0.851836	0.840902	1.27006	1.99816	1.36343	2.36974	19.005	0.498109	2.9288	18.8305	0.0215589	-0.454823
	89	0.634246	0.445478	0.882868	1.10238	0.467747	0.791424	0.866969	0.89079	0.924036	1.21596	-0.699813	1.39213	2.21023	18.7075	0.86087	10.7556	9.88051	0.0486795	0.294564
	90	0.643254	0.474065	0.882448	1.0576	0.490617	0.737266	0.807881	0.859137	0.869358	1.28461	0.187214	1.34373	2.13825	21.4584	0.754149	11.6901	2.46203	0.0635246	0.153765
	91	0.61127	0.361922	0.89903	1.26439	0.428121	0.763782	0.79419	0.916364	1.18805	1.1843	2.25152	2.41675	1.73087	8.11132	0.54531	9.72843	13.3986	0.0997114	0.858973
	92	0.610116	0.420317	0.87759	1.10928	0.444026	0.800486	0.87746	0.896072	0.935076	1.19659	-1.9327	1.49797	2.11015	19.449	1.76272	1.34292	9.00007	0.0310167	0.313478
	93	0.613222	0.366416	0.900831	1.24465	0.42403	0.746654	0.802645	0.864491	0.85652	1.22535	2.39597	1.41239	1.96608	16.3212	1.23558	1.56853	12.2606	0.0668637	-0.212529
	94	0.602364	0.323537	0.911547	1.41346	0.471956	0.848017	0.90673	0.921742	0.949256	1.0057	2.18169	1.34967	2.76196	14.1016	0.731348	12.45	18.2059	0.0892305	0.277221
	95	0.620666	0.424841	0.860535	1.20922	0.482717	0.793341	0.739808	0.944	1.25409	1.00856	1.30206	2.32049	2.89493	19.1761	1.35589	3.34068	14.7311	0.00414364	0.426748
	96	0.618484	0.366093	0.900559	1.27264	0.436424	0.827209	0.88461	0.910171	0.927574	1.13413	2.22337	1.45706	2.12678	12.3767	0.972821	19.2742	11.7977	0.0404638	0.284539
	97	0.600747	0.404149	0.880655	1.11943	0.428569	0.713716	0.79536	0.845435	0.865884	1.2757	1.206	1.30708	2.65743	19.5275	2.55869	1.4559	6.97079	0.0488714	-0.298739
	98	0.610099	0.337508	0.911201	1.33167	0.433429	0.816136	0.895778	0.905574	0.955886	1.22326	0.818528	1.45072	1.83638	8.16589	0.753749	14.3884	5.07188	0.0866899	0.701211
	99	0.66165	0.420933	0.895339	1.28012	0.504117	0.856862	0.908534	0.935198	1.06455	1.00681	0.234661	1.99214	2.78078	12.865	0.688814	2.4937	10.9719	0.010381	0.217653
	100	0.630965	0.424898	0.886373	1.14284	0.454629	0.80653	0.890512	0.900354	0.954633	1.18224	-0.595266	1.33957	2.18555	21.6436	0.781969	11.5769	14.2072	0.0103485	0.376188
	101	0.603605	0.364173	0.887675	1.26787	0.434396	0.820559	0.864656	0.92588	1.11324	1.08392	3.55097	1.68654	2.18784	11.6534	1.55267	14.1869	6.32525	0.0190377	0.63986
	102	0.659418	0.394993	0.908524	1.3333	0.503439	0.846293	0.912547	0.921358	0.961745	1.06079	2.28297	1.49713	2.59514	11.0068	0.34173	3.45884	16.8651	0.083966	0.335864
	103	0.61785	0.454323	0.847913	1.13306	0.493119	0.809474	0.870521	0.918423	1.10055	1.07129	-3.06931	2.38046	2.74193	19.9981	1.35391	15.8353	3.48822	0.0684177	0.134944
	104	0.632216	0.494087	0.873092	1.00427	0.510281	0.768596	0.878105	0.881618	0.970948	1.26477	3.17272	1.86763	2.77218	15.2016	0.383761	5.68471	12.7082	0.0772072	-0.248002
	105	0.610967	0.340851	0.905351	1.37471	0.466039	0.792013	0.80528	0.891984	0.837987	1.17865	3.70965	1.3705	1.56458	12.5571	0.665719	3.90128	2.42448	0.0552665	0.270832
	106	0.612266	0.373001	0.884566	1.29497	0.458896	0.751467	0.807043	0.906641	1.16887	1.0181	-3.20086	1.54004	2.76551	18.663	2.06132	3.50497	5.45563	0.0888268	0.856993
	107	0.625821	0.442202	0.859917	1.16271	0.485178	0.803573	0.798594	0.933315	1.19005	1.05213	0.897113	2.02536	2.85638	13.8546	1.81936	7.92154	3.116	0.0358917	0.51258
	108	0.615323	0.400195	0.879524	1.19333	0.445136	0.768476	0.782892	0.879009	0.81973	1.24551	-1.92519	1.2942	2.69844	9.82931	0.708662	15.4229	13.1905	0.0905498	0.0799963
	109	0.610183	0.424507	0.883629	1.08205	0.442399	0.787595	0.872797	0.8892	0.937518	1.27682	1.37504	2.24101	1.56657	14.5551	0.69653	2.12033	10.1111	0.0649475	0.0337836
	110	0.649029	0.469481	0.880859	1.09224	0.491326	0.822135	0.911882	0.911937	1.00312	1.17549	1.39165	1.46301	2.67042	16.3043	0.891417	18.1949	3.20811	0.00169546	0.38648
	111	0.619275	0.453885	0.870776	1.06374	0.473237	0.819069	0.907266	0.913505	1.03344	1.20244	1.6226	2.20723	1.59542	20.3394	0.487155	2.19488	19.6008	0.0499779	0.297035
	112	0.625961	0.370649	0.90002	1.39343	0.519067	0.756394	0.727804	0.931784	1.26351	0.936644	3.33584	2.16421	2.69618	21.7909	0.667187	13.9444	4.62152	0.0812279	0.625068
	113	0.625842	0.459064	0.871695	1.06899	0.479049	0.804015	0.881392	0.913004	1.08062	1.15122	-0.86551	1.60974	2.76745	15.9115	1.15245	16.8998	8.32733	0.027079	0.512924
	114	0.632793	0.409129	0.887529	1.20381	0.456916	0.740086	0.780387	0.86128	0.829745	1.21609	-0.162648	1.13762	2.19729	21.8358	0.856501	1.62222	14.5458	0.0307585	0.102052
	115	0.611184	0.420072	0.877829	1.11302	0.444467	0.700138	0.840964	0.866319	1.08615	1.316	2.76558	1.14574	2.0343	15.2902	1.38425	9.33177	1.29686	0.0622912	0.929649
	116	0.605893	0.453673	0.871797	1.0222	0.469392	0.764534	0.849333	0.875818	0.914682	1.36461	3.4425	1.38284	1.87101	21.3746	0.768174	3.17334	5.46806	0.0675543	0.345277
	117	0.612408	0.378451	0.890394	1.22907	0.432694	0.804436	0.855887	0.897581	0.898614	1.24524	-0.103188	1.14956	2.1628	11.013	0.955194	17.5705	8.79908	0.0854766	0.539559
	118	0.608614	0.442022	0.878341	1.04354	0.45719	0.782477	0.861904	0.885726	0.922464	1.2617	-1.36122	2.00161	2.40213	11.7545	0.992363	15.4299	2.8095	0.0726154	-0.219459
	119	0.610067	0.499349	0.846184	0.994496	0.523595	0.802484	0.79776	0.932822	1.19076	1.12531	2.29815	2.54011	2.88248	17.3335	0.509466	11.917	14.894	0.00364762	0.151399
	120	0.61095	0.398047	0.885791	1.16158	0.431497	0.827852	0.908199	0.919227	1.04363	1.22602	-0.65904	1.66491	2.87903	6.97498	1.73868	4.06611	5.31531	0.00277906	0.592471
	121	0.622643	0.368722	0.905239	1.25834	0.431851	0.786627	0.855369	0.887536	0.90906	1.16926	2.69636	1.73335	1.9817	13.1553	1.05829	13.1629	7.80561	0.0733285	-0.199322
	122	0.648703	0.401104	0.900546	1.25845	0.468976	0.795769	0.842182	0.892398	0.884551	1.10222	-2.31234	1.60641	2.68282	12.8985	1.19216	12.6269	1.24354	0.0611525	-0.0892161
	123	0.601976	0.340302	0.898171	1.36083	0.457197	0.813332	0.853842	0.902494	0.89112	1.07476	-0.620186	1.05739	2.71789	14.9449	1.07688	1.81251	15.6965	0.0175667	0.413152
	124	0.607684	0.365732	0.892048	1.25958	0.431441	0.788938	0.890528	0.893007	0.976831	1.1728	1.46439	1.02348	2.41406	16.5415	2.39254	8.53878	3.98483	0.0424542	0.666667
	125	0.619937	0.44566	0.879963	1.06398	0.462607	0.823475	0.912625	0.912723	1.00415	1.24476	0.904792	1.76939	2.11604	11.9533	1.01059	4.20929	7.26482	0.0856582	0.435781
	126	0.625688	0.366454	0.907504	1.27356	0.436093	0.849894	0.920392	0.923937	0.976507	1.18871	3.71701	2.10885	1.8392	8.57998	0.833629	1.82761	7.98206	0.00187727	0.251488
	127	0.614033	0.378476	0.889368	1.24145	0.43808	0.822916	0.911959	0.911967	1.00119	1.08005	3.19357	1.46181	2.87453	21.8748	1.79191	9.08102	16.4523	0.0030434	0.0958509
	128	0.62167	0.400451	0.881692	1.2135	0.452387	0.806003	0.819213	0.929453	1.16645	1.05716	-0.0588759	1.91461	2.3643	12.9305	1.11799	16.3227	19.019	0.0258605	0.599646
	129	0.601651	0.359169	0.885488	1.30304	0.447083	0.709675	0.738148	0.84458	0.789261	1.22277	2.64562	1.01623	2.63788	18.6546	1.20762	2.56153	8.17986	0.049794	-0.220787
	130	0.600309	0.353305	0.88703	1.33269	0.457074	0.728695	0.736332	0.857679	0.778042	1.18013	1.7332	0.936558	2.73575	15.9269	1.09553	14.4555	7.6858	0.082709	0.0566647
	131	0.616433	0.373318	0.886721	1.31871	0.472436	0.845989	0.874013	0.936429	1.10877	1.0018	2.642	1.91094	2.34646	14.647	1.51495	8.37288	3.10059	0.0384902	0.420501
	132	0.602363	0.435086	0.867173	1.0685	0.455213	0.763466	0.866319	0.894628	1.08226	1.27703	3.73878	1.43608	2.01687	19.525	0.585845	17.8233	18.5006	0.0972199	0.661489
	133	0.668664	0.45632	0.895658	1.15229	0.488622	0.741408	0.83036	0.89444	1.1328	1.1287	0.475872	1.53788	2.07884	19.6495	1.0577	9.42935	1.29509	0.0346165	0.763605
	134	0.632527	0.461954	0.873392	1.07866	0.483012	0.742053	0.781622	0.862371	0.830449	1.2778	-1.80575	1.3153	2.95101	12.1972	0.914393	17.9018	2.37185	0.0813157	0.04103
	135	0.621075	0.358654	0.902598	1.32432	0.455343	0.810201	0.892701	0.902078	0.956131	1.06451	1.62546	2.03028	1.58142	18.2637	0.985257	15.6745	1.1279	0.0112268	-0.0563494
	136	0.610487	0.39582	0.867439	1.25839	0.470195	0.815251	0.877128	0.919836	1.09312	1.04779	3.36546	2.63416	1.76598	16.1552	1.06322	19.0473	2.31688	0.0527415	0.0404186
	137	0.600126	0.348046	0.890563	1.34827	0.45984	0.801636	0.812965	0.928929	1.17301	0.975351	-1.29814	1.94678	2.84702	9.88021	1.71993	3.20285	8.60169	0.0578666	0.628232
	138	0.638459	0.463358	0.882694	1.06864	0.480854	0.788061	0.879677	0.890175	0.950844	1.21699	1.11271	1.86206	2.95038	11.8358	0.936657	12.0703	2.92158	0.0497381	-0.280747
	139	0.665662	0.449732	0.892337	1.17597	0.489863	0.798747	0.894366	0.897443	0.974691	1.11805	3.22872	1.60761	2.62741	18.5994	1.01823	3.10307	7.9781	0.0337133	0.0530531
	140	0.612071	0.393515	0.884512	1.18704	0.434756	0.749449	0.780472	0.867043	0.825314	1.23459	-2.41546	1.48175	2.53649	12.3835	1.02438	1.83746	8.46301	0.0190707	-0.279124
	141	0.609415	0.403354	0.885513	1.13869	0.431102	0.803215	0.82971	0.897346	0.864129	1.36682	1.53575	1.48025	2.05487	9.21806	0.472048	13.9259	8.79127	0.0167569	0.276696
	142	0.63677	0.395108	0.889728	1.30612	0.490075	0.835481	0.872327	0.931567	1.10778	1.00146	-3.74398	1.89196	2.58416	19.6665	1.22293	6.99707	1.40291	0.0930383	0.621006
	143	0.622077	0.370848	0.896571	1.29068	0.451695	0.757932	0.880656	0.881145	1.0108	1.14272	0.14246	1.0222	2.38133	15.5344	1.29303	19.7102	3.95381	0.0760909	0.785801
	144	0.623581	0.400723	0.892079	1.1799	0.438644	0.73405	0.78089	0.857483	0.833573	1.24879	-0.83365	1.38661	2.22911	16.9277	0.640535	4.97589	19.6706	0.0295119	-0.292762
	145	0.621653	0.433596	0.881688	1.09769	0.454772	0.765664	0.861929	0.877392	0.936511	1.22233	1.39669	1.76393	2.32969	16.7745	0.955247	11.3114	9.74406	0.0598459	-0.275224
	146	0.620794	0.363784	0.903026	1.28472	0.439375	0.774565	0.8453	0.880698	0.901515	1.13057	0.270306	1.64753	1.94866	21.8797	0.786451	1.13957	19.5313	0.0565869	-0.354811
	147	0.605512	0.356225	0.889903	1.32553	0.455616	0.849675	0.894375	0.934254	1.08267	1.00787	2.79403	1.7732	2.37041	17.4855	1.24789	7.67294	15.4296	0.0169668	0.351697
	148	0.640381	0.366413	0.913468	1.39811	0.514767	0.73924	0.762712	0.914025	1.22116	0.958802	3.06159	1.69037	2.74435	15.8263	0.533557	1.80806	14.17	0.0198627	0.765474
	149	0.60284	0.434085	0.868595	1.06921	0.45392	0.703019	0.798092	0.885413	1.16624	1.19998	-0.698023	1.57313	1.94608	21.3242	0.938642	5.27305	18.5299	0.0525096	0.814815
	150	0.639481	0.402464	0.889096	1.27076	0.479004	0.749258	0.774223	0.867337	0.817309	1.12766	-2.65009	1.24011	2.67287	20.0853	0.857353	1.5369	5.84663	0.0167511	-0.0333471
	151	0.607023	0.349476	0.899815	1.30638	0.434954	0.831148	0.89634	0.912618	0.944234	1.06701	-1.96189	1.86233	2.50626	10.5397	1.0075	10.4492	18.3477	0.019391	-0.0584714
	152	0.662341	0.488317	0.876001	1.10574	0.514961	0.813771	0.906619	0.909691	1.02375	1.10788	-1.32989	2.08657	2.84263	15.7011	0.795734	1.06524	7.76518	0.00610015	-0.0929169
	153	0.601649	0.345473	0.897999	1.30906	0.432125	0.71199	0.793478	0.891541	1.17575	1.0651	0.20569	1.55099	1.71503	15.025	2.07501	9.60436	3.3677	0.0640148	0.964297
	154	0.615253	0.444494	0.87296	1.06987	0.463748	0.735499	0.869296	0.873119	1.03138	1.32831	-0.644192	1.30995	2.12441	11.5666	0.626887	16.9371	1.71251	0.0248989	0.804726
	155	0.622623	0.371893	0.907152	1.23664	0.425631	0.778772	0.833265	0.882833	0.881372	1.22104	0.486882	1.93366	2.15712	11.0283	0.882875	4.60254	2.17931	0.0251111	-0.612637
	156	0.604855	0.357254	0.894863	1.27547	0.428876	0.785887	0.894432	0.895259	1.01319	1.37244	3.14825	1.36253	1.98849	7.09385	0.758001	10.0037	2.00624	0.0128702	0.871392
	157	0.618318	0.44131	0.867187	1.10518	0.467615	0.743168	0.742615	0.92194	1.24526	1.1568	0.442919	2.39265	2.75059	7.60541	1.20062	4.05542	3.82239	0.0215839	0.726559
	158	0.604537	0.368319	0.889114	1.24413	0.428049	0.721023	0.765679	0.850039	0.819949	1.26329	2.45026	1.21126	2.29399	17.6384	0.96382	2.09152	15.6616	0.0446585	-0.339092
	159	0.604177	0.334584	0.907083	1.34071	0.436031	0.831813	0.88096	0.912454	0.919339	1.11039	-2.63669	2.59274	1.31316	13.0459	0.371679	12.1312	7.44067	0.0231867	0.18964
	160	0.653053	0.465584	0.88082	1.11774	0.492523	0.715682	0.853769	0.869581	1.06614	1.2666	3.15524	1.21419	2.05352	20.3129	0.583654	1.57005	4.8819	0.0401446	0.796465
	161	0.655261	0.465192	0.881659	1.12437	0.493496	0.708826	0.835507	0.874358	1.10617	1.18491	-1.4457	1.30944	2.71366	13.2445	0.592892	19.1689	5.79337	0.0548991	0.82306
	162	0.639229	0.390089	0.896647	1.29	0.473491	0.835991	0.91768	0.920458	1.02121	1.05347	3.01862	1.3927	2.74868	20.1875	1.05462	16.4819	8.33268	0.0500711	0.403761
	163	0.612213	0.382135	0.88205	1.25061	0.447698	0.829353	0.915391	0.915949	1.0097	1.05195	-2.00909	1.95476	2.12276	17.4952	1.11327	14.22	16.6753	0.0267045	0.148654
	164	0.61738	0.420992	0.873723	1.14544	0.453967	0.74152	0.803432	0.902925	1.17093	1.13881	-3.03404	2.09901	1.53898	19.6076	1.19459	5.60719	1.01371	0.00798908	0.953368
	165	0.601524	0.406219	0.856892	1.20033	0.459662	0.807024	0.900058	0.908306	1.03976	1.08743	-3.6119	2.21591	2.87188	18.0455	0.964332	6.97054	18.4699	0.0284164	-0.192405
	166	0.640454	0.380388	0.906368	1.2869	0.458854	0.852159	0.92502	0.925882	0.988663	1.18762	-3.02676	2.51297	2.36125	6.4725	0.449881	7.04062	3.51653	0.0763855	0.378485
	167	0.616208	0.432654	0.878968	1.08981	0.453038	0.763032	0.856286	0.897841	1.10108	1.21808	1.76591	1.52324	2.01749	16.7147	1.11153	10.5254	8.69025	0.0528655	0.730224
	168	0.622644	0.379582	0.90352	1.21818	0.427279	0.740344	0.839988	0.890746	1.11691	1.20259	-1.34512	2.33974	1.07858	17.5103	0.500615	9.04155	10.1163	0.0875586	0.969038
	169	0.659594	0.424216	0.89998	1.21143	0.473861	0.780134	0.85085	0.883871	0.906406	1.11927	0.492975	1.41868	2.87601	16.8695	1.66117	16.9514	1.46277	0.083522	-0.0601576
	170	0.649936	0.380678	0.910881	1.37438	0.514764	0.850518	0.924394	0.924964	0.990733	0.968007	-0.330839	1.78876	2.47077	19.869	0.730831	3.71552	4.90934	0.0923138	0.138854
	171	0.618913	0.393699	0.875241	1.31806	0.499128	0.779827	0.779658	0.8868	0.810959	1.19126	1.69568	0.979481	2.39039	12.7988	0.465942	11.819	2.35947	0.0516989	0.380675
	172	0.603998	0.351139	0.8972	1.29296	0.430238	0.792228	0.89716	0.897194	1.00266	1.18838	3.38993	1.17407	1.96768	12.8143	0.955507	16.0982	12.1112	0.0357449	0.736298
	173	0.602963	0.343797	0.897594	1.3363	0.44591	0.811187	0.875741	0.918385	1.0937	1.02074	1.72436	1.41767	2.40488	19.8613	1.3277	16.8873	12.1337	0.0218675	0.61542
	174	0.601489	0.395003	0.874463	1.17233	0.433816	0.838469	0.917982	0.922048	1.02551	1.16096	-1.09952	2.47524	2.99232	7.21505	1.72795	14.3176	1.82511	0.0395121	-0.122689
	175	0.649318	0.391442	0.903381	1.3576	0.517165	0.859409	0.889347	0.940117	1.09305	0.961688	1.0962	2.14284	2.40035	16.536	0.625661	13.9353	1.48364	0.0354373	0.28134
	176	0.611411	0.376373	0.889994	1.23558	0.433156	0.821052	0.844418	0.907286	0.875061	1.46232	2.71164	1.40035	2.30102	6.58664	0.37698	13.626	13.306	0.0282945	0.448274
	177	0.64598	0.384618	0.910086	1.27334	0.456034	0.845862	0.910968	0.921138	0.958678	1.20377	-0.392664	1.78647	2.68127	6.31806	0.553785	14.094	5.93045	0.049631	0.41699
	178	0.617038	0.404896	0.869459	1.2334	0.468369	0.768697	0.835813	0.877569	0.890602	1.23203	0.419326	0.865746	2.78355	18.4987	1.17744	16.9182	1.32572	0.0826912	0.605114
	179	0.606838	0.315399	0.924214	1.45957	0.498272	0.805277	0.831924	0.898202	0.86626	0.981397	-0.162079	1.4425	2.47006	16.2294	0.86963	7.50091	1.17186	0.0877098	-0.0808322
	180	0.603086	0.469872	0.865878	0.991424	0.487191	0.771454	0.879667	0.894128	1.05719	1.23894	1.08645	1.49141	2.58455	21.8903	1.72256	3.25394	3.04802	0.0686323	0.522643
	181	0.650529	0.413284	0.897088	1.22805	0.469304	0.760461	0.797085	0.87293	0.841798	1.24145	3.31974	1.41523	2.68151	10.2295	0.529628	19.4819	3.32025	0.0569437	-0.246565
	182	0.636196	0.426082	0.883265	1.17047	0.464561	0.77996	0.826034	0.883745	0.870583	1.22509	1.54294	1.08083	2.95553	15.622	1.27751	11.8393	4.60193	0.0818337	0.274887
	183	0.607504	0.323942	0.916717	1.37528	0.443866	0.828809	0.86623	0.910884	0.900237	1.12042	0.176765	1.91247	2.42926	7.22091	0.481134	7.8754	15.6255	0.0512926	-0.0774681
	184	0.617151	0.395376	0.889503	1.18323	0.434504	0.806776	0.841439	0.898857	0.877886	1.249	-2.0163	1.7279	2.9226	7.24526	1.46695	13.0451	1.38311	0.0471909	0.026741
	185	0.610563	0.379218	0.884964	1.2408	0.439508	0.849846	0.920547	0.928583	1.03482	1.09993	-0.834524	2.34208	1.49428	13.2412	1.31082	16.9091	1.09314	0.0538942	0.453594
	186	0.600109	0.422807	0.862198	1.10963	0.450324	0.71592	0.735088	0.849138	0.782241	1.35058	-2.93759	1.24884	1.8158	19.0149	0.739789	6.93795	2.84841	0.0300128	0.206356
	187	0.602314	0.331877	0.904806	1.39322	0.468303	0.720057	0.755823	0.907478	1.22597	0.960422	0.0671634	1.65422	2.93721	11.0953	1.04094	17.5359	12.6976	0.0535351	0.818221
	188	0.608292	0.371938	0.883977	1.274	0.446897	0.852121	0.905019	0.933479	1.0678	1.04063	-0.422211	1.95917	2.35277	10.8024	1.44188	5.89703	13.0994	0.0329437	0.37344
	189	0.638332	0.392089	0.899981	1.24901	0.454521	0.840281	0.900879	0.917524	0.945021	1.11635	-2.29964	2.06899	1.74991	12.025	0.960151	11.8615	1.51712	0.0658908	0.301617
	190	0.605412	0.356025	0.904743	1.24303	0.411303	0.778629	0.815949	0.883134	0.857813	1.28617	2.20669	1.71733	1.80393	10.003	1.16212	1.07934	6.15378	0.0297486	-0.0967191
	191	0.637712	0.403228	0.890596	1.24161	0.465405	0.763895	0.788975	0.875581	0.829555	1.15178	-1.14324	1.18781	2.96287	13.1536	0.919346	9.65299	9.92678	0.0449945	0.0436226
	192	0.622279	0.397325	0.884968	1.21543	0.449025	0.814772	0.903728	0.906003	0.979196	1.10552	1.492	1.80061	2.80349	11.6343	1.87963	5.49161	7.66889	0.0313541	-0.117978
	193	0.614224	0.449247	0.849113	1.12772	0.485947	0.76327	0.722199	0.936342	1.27041	1.06912	2.61412	2.34549	2.44927	15.4189	1.16845	9.29365	10.8242	0.0370205	0.590601
	194	0.600944	0.387092	0.878768	1.186	0.428718	0.805388	0.843453	0.897983	0.881259	1.27535	-3.3499	2.0387	2.59195	8.37519	0.40422	15.9745	15.0916	0.0907557	-0.228832
	195	0.647445	0.398968	0.897758	1.28532	0.480981	0.717722	0.834973	0.87983	1.11311	1.11419	3.1619	1.19591	2.27207	16.9131	0.567114	9.48866	8.61814	0.0210826	0.863447
	196	0.612461	0.416971	0.873302	1.14116	0.448689	0.750873	0.872626	0.883795	1.05216	1.25948	2.37341	1.1551	2.39534	13.6297	0.744679	4.55383	12.9866	0.00710203	0.775925
	197	0.609459	0.378924	0.887788	1.22399	0.431692	0.743117	0.788295	0.862743	0.838818	1.20922	1.54478	1.1429	2.80053	15.8473	2.01054	9.92696	4.16139	0.00217707	-0.161395
	198	0.620085	0.425562	0.876782	1.13068	0.454364	0.735744	0.765262	0.911817	1.21754	1.16393	-2.62921	2.45413	1.94589	9.86822	0.702001	6.99764	7.35833	0.0510504	0.922377
	199	0.626418	0.426817	0.868072	1.1889	0.475167	0.831657	0.821069	0.940801	1.16885	1.08171	2.16895	2.63281	2.80488	8.19185	1.07157	1.69074	10.0306	0.089617	0.311788
	200	0.638601	0.408196	0.88844	1.23414	0.468054	0.785308	0.834978	0.886699	0.880021	1.18437	2.88954	1.0497	2.78244	19.8929	1.14025	10.6576	5.5314	0.0647469	0.295043
	201	0.602689	0.417774	0.876017	1.0962	0.43932	0.77839	0.828452	0.882689	0.874833	1.25399	-2.11757	1.53685	2.63332	10.5959	2.51959	1.89662	3.45826	0.0567703	0.0968924
	202	0.613118	0.435542	0.872486	1.0886	0.457318	0.812644	0.904613	0.910324	1.03251	1.18587	2.80457	1.64322	2.19619	18.9828	1.77556	9.07479	7.16958	0.0829698	0.368249
	203	0.63469	0.389898	0.896563	1.25882	0.457287	0.730608	0.755548	0.856839	0.801855	1.17943	-1.94809	1.23403	2.17515	18.1171	0.857422	18.07	5.05075	0.0862906	-0.0340508
	204	0.601961	0.383499	0.875341	1.22006	0.437767	0.79592	0.870094	0.911694	1.09528	1.11167	3.08245	1.27411	2.89836	20.3314	2.10902	7.32342	18.6766	0.0513375	0.607465
	205	0.606555	0.387979	0.888539	1.17294	0.423599	0.801023	0.847461	0.895442	0.888934	1.29454	2.70859	1.64873	2.28793	8.5761	1.1881	9.96262	3.18765	0.00271639	0.000592518
	206	0.604452	0.357507	0.889071	1.30991	0.44823	0.83554	0.918491	0.918796	1.00705	1.02947	2.64618	1.52298	2.54564	19.6774	2.09942	15.8178	2.76903	0.0104109	0.227085
	207	0.624866	0.433748	0.874165	1.13089	0.463647	0.732911	0.736978	0.860498	0.777021	1.35719	-1.77848	1.34297	2.6691	9.0324	0.47264	15.1712	3.48094	0.0515691	-0.073486
	208	0.624525	0.423355	0.885252	1.12805	0.449586	0.814992	0.904033	0.906217	0.979644	1.17023	0.194961	2.13025	1.67922	15.9126	0.940273	1.5318	13.0847	0.0137396	0.136657
	209	0.64745	0.388961	0.902829	1.3191	0.488043	0.812704	0.90736	0.908345	1.01347	1.08453	3.60618	1.21879	2.85528	12.1412	1.35222	1.19353	1.34955	0.0326285	0.609533
	210	0.618013	0.352289	0.904791	1.33015	0.450941	0.814524	0.891166	0.903966	0.948792	1.07277	-0.148539	1.94628	2.72979	15.1586	0.794229	14.818	7.24412	0.0657197	-0.710801
	211	0.604026	0.332728	0.906631	1.36081	0.446509	0.74539	0.751295	0.867113	0.789773	1.12197	-1.71502	1.21221	1.97525	14.8611	1.65573	1.88969	1.60845	0.0442719	0.0491368
	212	0.604991	0.354759	0.890482	1.32814	0.455327	0.791505	0.805442	0.891761	0.83833	1.11559	-1.95505	0.981472	2.59228	17.7587	1.47882	3.33213	3.43092	0.0165923	0.401561
	213	0.6189	0.389426	0.881695	1.25444	0.457724	0.814966	0.902533	0.905793	0.975004	1.06229	-1.09584	1.76807	2.3419	17.167	0.951957	16.8168	17.9675	0.0660119	-0.00913197
	214	0.603296	0.340777	0.900144	1.34228	0.445519	0.81862	0.905556	0.908151	0.97801	1.04441	-0.624244	1.1339	2.86011	19.9335	1.68289	2.55414	15.9396	0.0195544	0.497524
	215	0.627415	0.359618	0.905933	1.34679	0.469929	0.771092	0.824018	0.911456	1.15208	1.01706	2.46197	1.50036	2.58156	12.6264	1.07536	16.0752	7.8637	0.0650246	0.764136
	216	0.662663	0.424432	0.898492	1.23495	0.484469	0.710859	0.8005	0.888541	1.16546	1.07365	-1.0605	1.53881	1.99753	20.7284	0.846044	1.6419	10.1614	0.0739911	0.844588
	217	0.608205	0.380353	0.874297	1.30983	0.478307	0.732793	0.862693	0.864472	0.977969	1.14795	-2.27823	0.965735	2.3046	18.695	0.563922	5.41386	12.9176	0.0489302	0.815563
	218	0.61278	0.337213	0.909936	1.37242	0.459186	0.819459	0.848035	0.906062	0.880546	1.09286	2.17064	1.20759	2.12153	13.1498	1.09251	17.2751	1.24627	0.0300691	0.35914
	219	0.6074	0.338003	0.90561	1.35303	0.448001	0.793158	0.89743	0.897438	1.00131	1.06683	0.45707	1.08241	2.53813	16.8734	2.1829	6.43751	3.50937	0.0615489	0.66813
	220	0.658444	0.455811	0.8812	1.1719	0.497527	0.830844	0.901158	0.912947	0.953188	1.1162	-1.76599	1.38811	2.96399	16.486	0.585193	16.1568	6.45062	0.00468439	0.335557
	221	0.626144	0.473798	0.860754	1.06317	0.496504	0.788924	0.890999	0.90016	1.04374	1.1391	0.862918	2.02048	2.83861	20.8167	1.4912	1.43019	4.84239	0.00747816	-0.183858
	222	0.64912	0.417718	0.893814	1.21765	0.470467	0.744809	0.786727	0.909549	1.19314	1.0846	-1.25323	2.00899	2.16289	9.96331	0.79815	18.0528	5.79048	0.0658137	0.832588
	223	0.64474	0.481738	0.853304	1.15332	0.527169	0.803955	0.809908	0.930461	1.17692	1.03824	0.189022	2.82855	2.48683	17.2927	0.64934	11.256	6.08866	0.0947722	0.0910178
	224	0.62382	0.341522	0.916255	1.36866	0.460862	0.83761	0.915157	0.917819	0.978915	1.0734	1.25059	2.10348	1.13105	20.6479	0.575202	6.10494	6.33066	0.0741195	0.511955
	225	0.63572	0.396519	0.893957	1.24508	0.458818	0.815046	0.895825	0.904736	0.957842	1.09181	1.91552	1.6646	2.58225	12.2617	1.58661	14.0562	5.67032	0.0886184	0.0526495
	226	0.652799	0.431612	0.893402	1.18089	0.471812	0.739248	0.813889	0.860322	0.877007	1.2317	3.30034	1.48599	2.33781	19.8903	0.371207	7.66798	8.15489	0.0128819	-0.406108
	227	0.605095	0.480161	0.867934	0.971809	0.498007	0.70362	0.788541	0.889035	1.18001	1.28781	2.96568	1.68286	2.72889	10.708	0.860547	5.87855	1.35881	0.0158697	0.807599
	228	0.606341	0.352691	0.899057	1.28729	0.428788	0.795558	0.866225	0.89306	0.919629	1.19938	1.52071	1.12221	1.63294	19.9516	1.19288	13.6466	5.75724	0.0373083	0.600179
	229	0.611966	0.435074	0.860007	1.12352	0.466816	0.815522	0.898586	0.914377	1.05435	1.14337	3.44984	1.7518	2.29199	21.2939	1.13778	1.85417	18.9867	0.0764207	0.234229
	230	0.649745	0.448452	0.888578	1.13032	0.47578	0.768117	0.857426	0.878092	0.926069	1.16304	-0.378893	1.59102	2.7167	20.3958	1.07594	10.899	4.18429	0.0270612	-0.23379
	231	0.641353	0.377613	0.906889	1.3083	0.467416	0.712986	0.810687	0.886161	1.15126	1.07847	2.53205	1.33001	2.10148	14.8015	0.948491	9.56094	3.3272	0.0213463	0.917138
	232	0.606756	0.417102	0.864519	1.14745	0.452576	0.796483	0.899158	0.899597	1.0094	1.13239	3.22515	1.61688	2.96056	16.3153	2.22661	11.0819	13.4338	0.0759071	0.0408061
	233	0.607102	0.453271	0.843455	1.1047	0.486732	0.814579	0.847761	0.926523	1.13333	1.10087	2.99018	2.09446	2.43925	21.1251	1.3926	6.03752	11.996	0.0844089	0.251294
	234	0.617337	0.407705	0.871794	1.2058	0.45961	0.759567	0.781279	0.873519	0.821558	1.1998	-2.07622	1.03323	2.77902	19.0551	0.978204	10.2355	6.03413	0.0222058	0.240094
	235	0.608334	0.415009	0.868511	1.14748	0.449387	0.789495	0.894007	0.894295	0.992199	1.1515	2.49564	1.73057	2.78695	17.4346	1.48784	9.06225	15.3698	0.0586354	-0.22461
	236	0.649028	0.462226	0.878082	1.12205	0.490646	0.809002	0.897913	0.910513	1.04913	1.15008	1.06749	2.91561	1.81369	15.9231	0.38201	5.6932	2.86087	0.00623411	-0.333948
	237	0.652621	0.446943	0.881916	1.17339	0.488274	0.783976	0.822029	0.88614	0.863217	1.17078	-2.22088	1.24513	2.82225	16.317	0.838564	8.02954	5.42334	0.0583216	0.23702
	238	0.635918	0.460552	0.871943	1.09857	0.485325	0.834068	0.879683	0.929254	1.09732	1.12444	2.70912	1.90623	2.78448	13.7228	0.970855	16.1474	9.69685	0.0280213	0.329382
	239	0.612773	0.417355	0.880764	1.11875	0.442187	0.75242	0.854621	0.870173	0.934579	1.23251	3.24422	1.62519	2.35509	18.3035	1.53671	14.3167	6.26328	0.0935468	-0.266394
	240	0.611378	0.383404	0.889665	1.20606	0.429425	0.795533	0.865104	0.89266	0.918299	1.16203	-1.0162	1.83456	2.57574	10.7935	1.87409	10.2727	4.75349	0.0871529	-0.331422
	241	0.60676	0.320371	0.917584	1.4043	0.459961	0.722817	0.839764	0.880849	1.10714	1.01612	-0.814717	1.24859	1.94904	18.1426	1.09582	2.04885	9.36803	0.0297095	0.892934
	242	0.605284	0.380994	0.875061	1.25555	0.450225	0.706449	0.854482	0.854505	1.00254	1.22782	-2.0645	0.953487	2.01302	16.2605	1.11306	12.1424	2.3795	0.0927445	0.95258
	243	0.619702	0.409645	0.874612	1.19579	0.457357	0.735512	0.771731	0.909646	1.20962	1.06137	0.366565	1.63226	2.70861	15.3134	2.61817	15.0282	3.92883	0.0658684	0.765917
	244	0.663025	0.458017	0.880804	1.19066	0.506862	0.84156	0.890622	0.93078	1.08469	1.06694	1.59551	1.93493	2.48874	15.7465	0.646719	1.7735	15.5003	0.0870052	0.312328
	245	0.620102	0.37884	0.885901	1.32884	0.485528	0.702815	0.700931	0.917485	1.28746	0.974032	-3.1525	2.14632	2.56751	14.7905	0.756844	3.20786	14.8896	0.0600882	0.877923
	246	0.603965	0.431891	0.880092	1.05182	0.447112	0.787878	0.841305	0.888082	0.887491	1.30098	-1.82847	1.76688	1.75465	14.3021	0.990024	7.05642	1.97018	0.0292545	0.258154
	247	0.62534	0.378477	0.892708	1.29339	0.46269	0.734832	0.869511	0.871395	1.0221	1.17792	2.06608	1.00294	1.91276	21.1555	0.95666	8.45275	2.67588	0.032927	0.856667
	248	0.632308	0.431071	0.875307	1.16709	0.470649	0.780414	0.831263	0.884088	0.877377	1.25655	-0.441729	1.04614	2.56931	13.9676	0.699992	5.07928	8.59907	0.0593653	0.469562
	249	0.618001	0.353887	0.902553	1.33962	0.459055	0.731149	0.762972	0.856555	0.811306	1.13332	0.220793	1.23802	2.85611	17.5002	1.18475	5.17683	1.01508	0.0480882	-0.501186
	250	0.601827	0.449729	0.864267	1.03644	0.467978	0.777373	0.873842	0.900159	1.07712	1.24533	3.74055	1.32062	2.95692	21.167	0.694534	19.5957	15.5639	0.0116149	0.569594
	251	0.656182	0.439273	0.88434	1.21276	0.494263	0.709086	0.701414	0.919987	1.28767	1.04335	3.73184	1.934	2.52673	16.6575	0.91627	1.09839	15.2816	0.0208203	0.776818
	252	0.625112	0.381447	0.896392	1.25019	0.443871	0.749544	0.765804	0.868308	0.806338	1.25137	0.146831	1.41305	2.98313	8.84719	0.84081	7.30131	2.66612	0.0405252	-0.475178
	253	0.607783	0.396616	0.874296	1.19451	0.44283	0.752092	0.8679	0.872937	0.963869	1.3155	0.636984	0.984574	2.22863	10.8464	1.08651	1.48794	3.2507	0.0120777	0.819356
	254	0.605382	0.42713	0.875189	1.08015	0.446667	0.758084	0.875945	0.877567	0.980001	1.29878	-1.47164	1.31022	1.74388	20.4492	1.11104	3.33421	4.85864	0.0462988	0.695369
	255	0.615567	0.377438	0.892639	1.23912	0.435307	0.729411	0.76624	0.85531	0.816402	1.22908	0.993341	1.11188	1.94562	20.5028	1.61125	19.6676	1.05114	0.0276818	0.0932896
	256	0.609606	0.361875	0.88868	1.33567	0.468833	0.831584	0.868799	0.930398	1.11122	0.983642	-0.667642	1.77938	2.35027	17.1904	1.66311	1.41784	8.65906	0.0894837	0.505476
	257	0.624928	0.413892	0.877836	1.18912	0.458862	0.701374	0.743079	0.838663	0.800053	1.24493	-3.1219	1.33213	2.27561	21.3415	0.9412	13.0509	1.53946	0.0898663	-0.200972
	258	0.617963	0.419893	0.865086	1.188	0.468044	0.823198	0.897289	0.919174	1.06338	1.05407	-0.935874	2.12399	2.38281	16.2113	1.30688	8.86842	8.32123	0.00407598	0.078291
	259	0.640446	0.497411	0.87217	1.02272	0.51447	0.707244	0.760853	0.900007	1.21724	1.18484	-2.8426	2.02493	2.57839	11.9715	0.385115	9.55245	8.78749	0.0220346	0.862328
	260	0.602731	0.352516	0.899832	1.26624	0.418347	0.804415	0.846796	0.897565	0.886077	1.21028	1.05726	1.20944	1.78712	14.8105	1.30899	3.45102	14.4101	0.0367927	0.43177
	261	0.613396	0.372757	0.89798	1.22854	0.424852	0.786266	0.846217	0.887435	0.895222	1.28804	1.11542	1.24384	1.40312	18.1452	1.37031	4.48399	3.00882	0.0809869	0.597718
	262	0.611185	0.366406	0.901399	1.23388	0.419466	0.73489	0.774809	0.858243	0.825025	1.29957	1.4808	1.61568	1.9286	12.5357	0.619401	15.6934	6.90084	0.0928029	-0.505465
	263	0.610252	0.357718	0.900084	1.27577	0.428606	0.752575	0.80666	0.867913	0.858814	1.16218	1.86337	1.25611	2.15262	18.0703	1.95475	8.46243	7.21806	0.0525977	-0.0228431
	264	0.604403	0.419354	0.864699	1.12943	0.450373	0.722943	0.859913	0.870942	1.05448	1.24587	0.641199	1.00648	2.93589	20.4472	0.993466	11.6752	15.5285	0.0457827	0.771195
	265	0.605556	0.402037	0.874289	1.16325	0.438658	0.785952	0.86115	0.908842	1.10474	1.13031	-1.05694	1.80935	1.62239	19.0793	2.23392	2.90982	2.75657	0.0157355	0.718016
	266	0.62627	0.347863	0.913024	1.38006	0.477245	0.808533	0.834721	0.900106	0.868324	1.0843	3.36326	1.34909	2.35084	11.1377	0.682698	13.8637	5.97252	0.0604394	0.142336
	267	0.605902	0.414816	0.874626	1.11988	0.441116	0.831923	0.91652	0.916527	1.00104	1.22754	-0.539366	2.48852	2.62648	8.1247	0.607766	9.24746	14.4046	0.0677475	-0.230611
	268	0.649718	0.397802	0.904056	1.26048	0.465595	0.785719	0.828719	0.886935	0.871339	1.12538	-1.60344	1.4504	1.90342	18.7683	0.688952	9.9979	9.97642	0.0870474	0.161709
	269	0.610331	0.406405	0.878281	1.15333	0.439616	0.755956	0.837012	0.870403	0.901159	1.21856	3.23183	1.25012	2.7583	17.906	1.85616	10.6637	9.96432	0.044295	0.0359187
	270	0.617603	0.37133	0.88972	1.31161	0.465244	0.818845	0.843537	0.906044	0.874888	1.19712	0.891007	1.16538	2.71568	7.85841	0.519381	13.2966	9.32443	0.0487279	0.478898
	271	0.619088	0.377472	0.889496	1.27654	0.453323	0.759989	0.766638	0.922333	1.22006	1.06609	2.21465	2.07933	2.50592	8.13886	0.971488	15.7757	11.0662	0.0945682	0.771891
	272	0.606666	0.338473	0.905713	1.41914	0.496963	0.829282	0.850626	0.933183	1.1336	0.93905	-3.0719	1.96856	2.60224	16.1784	0.680637	18.7335	5.3789	0.078099	0.637239
	273	0.60122	0.383067	0.874009	1.22455	0.439367	0.774287	0.774111	0.883715	0.806342	1.23038	-3.04472	1.17139	2.47803	11.5114	1.54269	17.1906	1.31294	0.0776831	0.295381
	274	0.616089	0.334158	0.914699	1.39588	0.471463	0.827566	0.885858	0.910222	0.929513	1.00859	-1.29738	1.80516	2.84222	13.6466	0.834774	14.3983	5.738	0.0866198	-0.37405
	275	0.60708	0.363491	0.897997	1.24187	0.42014	0.751211	0.817145	0.867088	0.87442	1.20647	-0.260944	1.74158	2.50455	15.1495	0.931311	9.54671	7.26821	0.0968036	-0.897432
	276	0.616898	0.440535	0.850111	1.17229	0.489264	0.821901	0.815711	0.937499	1.17337	1.04431	0.43928	2.20243	2.67735	15.2881	1.04987	18.8603	13.1861	0.0821777	0.3541
	277	0.629019	0.416495	0.88288	1.1767	0.456366	0.728479	0.816926	0.892121	1.14791	1.13962	2.01449	1.29259	2.71574	16.7883	1.25651	16.1322	11.1667	0.0474105	0.805253
	278	0.601362	0.352103	0.889952	1.32012	0.447569	0.830274	0.909814	0.913604	0.974132	1.03196	-1.30601	1.96761	1.97063	13.5856	1.52353	1.79563	7.87297	0.0268353	0.0974811
	279	0.652572	0.400311	0.901072	1.28892	0.483893	0.823364	0.907834	0.910318	0.978744	1.04169	2.43403	1.71836	2.54795	14.9558	1.29224	10.3647	1.17598	0.0289143	0.0461587
	280	0.618797	0.476884	0.865947	1.01962	0.494733	0.725186	0.791045	0.898799	1.18281	1.21266	3.48082	1.5835	2.63614	15.2734	1.31453	6.57176	3.59152	0.00151455	0.752016
	281	0.60825	0.404279	0.879206	1.14988	0.436236	0.778336	0.886878	0.89544	1.04317	1.21736	2.10876	1.20655	2.40131	15.7677	2.07389	18.6482	4.82773	0.0824834	0.70019
	282	0.625923	0.461242	0.856542	1.11102	0.492698	0.818422	0.811577	0.936902	1.17754	1.08078	0.975429	2.19987	2.858	13.1226	1.10638	10.9077	11.7878	0.0278906	0.385898
	283	0.629052	0.465032	0.868917	1.07179	0.486332	0.767948	0.845463	0.877405	0.905915	1.29363	2.04988	1.11459	2.67387	21.409	0.933521	1.83883	4.25269	0.0275323	0.379983
	284	0.613139	0.387391	0.88379	1.22042	0.440356	0.766603	0.884933	0.886209	1.01709	1.17048	0.929106	1.00439	2.87415	21.5304	2.52048	11.4419	6.59823	0.0999108	0.694328
	285	0.602946	0.368578	0.882414	1.26866	0.440814	0.806163	0.88195	0.914053	1.08093	1.05887	-2.1819	1.56125	2.02532	21.6473	1.47256	3.78766	15.0906	0.0682316	0.669045
	286	0.607309	0.362201	0.88635	1.33606	0.469964	0.847237	0.922843	0.925862	1.02137	1.00043	-3.42114	1.89961	2.28768	21.3155	0.942305	4.60015	14.063	0.0402249	0.306554
	287	0.60653	0.42738	0.880608	1.07013	0.444373	0.701793	0.76683	0.838104	0.832196	1.33135	-1.00755	1.46157	2.45383	15.6519	1.07338	2.96177	5.0794	0.0832744	-0.395706
	288	0.608491	0.358466	0.891003	1.32292	0.456485	0.854613	0.917723	0.932051	1.04639	1.02685	3.23652	1.70439	2.69824	11.6249	1.94271	7.56867	5.62086	0.0607816	0.332184
	289	0.621277	0.469925	0.848609	1.09534	0.501032	0.821673	0.827357	0.934701	1.15982	1.0948	-3.5006	2.40895	2.43252	19.7467	0.699789	19.9737	8.2882	0.055497	0.488762
	290	0.635182	0.383191	0.900304	1.27644	0.457695	0.857809	0.928584	0.928937	0.992909	1.07947	-0.126884	1.86995	2.89648	7.63228	1.55337	2.99149	3.44097	0.074033	0.269444
	291	0.626347	0.519354	0.862255	0.96475	0.540866	0.784095	0.890934	0.891368	0.990288	1.22479	-2.69483	2.26638	2.79829	16.2522	0.455418	2.66983	6.53951	0.0548196	-0.157561
	292	0.650105	0.463533	0.884285	1.10157	0.486102	0.772755	0.86614	0.881276	0.93817	1.18308	0.434228	1.64603	2.80548	17.6902	0.926892	2.54324	10.3971	0.0472291	-0.209454
	293	0.605967	0.39129	0.89513	1.14094	0.417192	0.817509	0.907266	0.908288	0.986273	1.31434	3.35541	1.81882	1.32548	16.0859	0.466691	9.08829	13.7291	0.0102441	0.599431
	294	0.605872	0.351663	0.893548	1.33433	0.454807	0.738413	0.771851	0.860652	0.819351	1.1661	3.44453	1.1137	2.45453	19.7235	0.815894	4.81539	12.11	0.0267144	-0.174304
	295	0.616158	0.383626	0.884054	1.25502	0.450965	0.827941	0.914444	0.914444	0.999916	1.06375	0.986613	1.40104	2.78783	21.9554	2.24797	2.74249	12.4197	0.0643588	0.288891
	296	0.609776	0.458294	0.863013	1.04267	0.477641	0.812292	0.880257	0.917798	1.08707	1.19952	2.2206	1.72617	2.60206	13.2936	1.13921	11.0134	9.59105	0.0980532	0.496248
	297	0.621826	0.334814	0.918962	1.39813	0.473312	0.863046	0.932155	0.932185	1.00202	1.014	0.396159	1.98481	2.44816	7.97169	0.51979	8.10113	14.3435	0.0451183	0.299088
	298	0.600101	0.334127	0.901917	1.3581	0.447251	0.846736	0.923727	0.924851	1.01305	1.0362	1.92597	2.14997	2.98467	7.80451	1.08588	15.8721	10.0938	0.0530409	-0.0938052
	299	0.614504	0.359248	0.897484	1.30869	0.447944	0.838246	0.917842	0.918722	0.988006	1.04874	-0.852911	1.70163	1.6591	20.005	1.49185	16.3055	2.42332	0.0606503	0.410886
	300	0.634753	0.388906	0.899458	1.24845	0.450819	0.80002	0.879316	0.896213	0.938414	1.32329	0.341694	1.34955	2.01548	7.86302	0.460592	18.8259	3.5916	0.0766286	0.709014
	301	0.682686	0.505331	0.884505	1.10554	0.530726	0.804955	0.888921	0.899385	0.952934	1.17914	-2.51735	1.45106	2.60242	16.758	0.565028	3.27598	1.59983	0.0888738	0.502977
	302	0.625337	0.382166	0.891406	1.2774	0.45873	0.750982	0.873736	0.874588	0.985355	1.20333	-1.9803	1.19962	1.81506	12.7994	0.472295	4.27853	13.462	0.0868599	0.824014
	303	0.604701	0.416385	0.881087	1.09415	0.436438	0.741943	0.842513	0.863654	0.921183	1.25897	2.1007	1.62058	2.67632	19.5694	1.02854	7.56458	13.3998	0.0320609	-0.517557
	304	0.672461	0.491486	0.871016	1.17341	0.539698	0.803	0.77274	0.939513	1.21906	1.02447	0.304842	2.4895	2.4222	19.9092	0.618705	1.29841	5.20762	0.0328217	0.432762
	305	0.63367	0.474822	0.874334	1.04771	0.492316	0.771749	0.857922	0.902106	1.10297	1.20002	-2.2153	1.68921	2.82093	11.0492	1.17583	5.00924	1.66612	0.0996833	0.73441
	306	0.637286	0.415591	0.88037	1.23922	0.480391	0.834794	0.917841	0.917846	1.0009	1.04142	-2.77743	1.8458	2.74646	16.9905	1.68812	2.48071	3.44975	0.0423399	0.184175
	307	0.619705	0.378361	0.893516	1.25148	0.441562	0.735441	0.791219	0.903755	1.18527	1.10847	0.0740527	2.04978	1.56254	11.9936	1.03022	8.34663	6.91152	0.0920095	0.931884
	308	0.61241	0.330558	0.915061	1.37649	0.453014	0.782712	0.892509	0.894585	1.02102	1.10715	1.90496	1.32825	1.60346	14.0059	0.807239	12.49	5.9656	0.0711299	0.802678
	309	0.601374	0.35817	0.884981	1.31553	0.453048	0.735998	0.707735	0.929288	1.28358	0.990745	3.53293	1.99077	2.15678	21.4401	1.11498	14.0286	15.5615	0.00325098	0.73841
	310	0.611513	0.39397	0.894851	1.15138	0.422677	0.750027	0.780168	0.867536	0.82456	1.33433	-1.36731	1.72371	1.23819	18.9529	0.582471	8.63575	6.07872	0.0359171	0.227919
	311	0.600771	0.347005	0.906327	1.25828	0.407615	0.758453	0.879182	0.885173	1.03757	1.50377	0.0854107	1.89632	1.50149	7.28448	0.535068	2.02464	8.09601	0.024787	0.935273
	312	0.626467	0.363404	0.906129	1.30253	0.447806	0.749529	0.800398	0.866189	0.851893	1.12843	0.945662	1.26877	2.67128	19.966	1.40644	4.77615	5.48357	0.0474041	-0.293003
	313	0.615027	0.433947	0.860973	1.13672	0.468591	0.793929	0.784308	0.932597	1.20489	1.08736	3.30781	2.03433	2.27525	18.3783	1.45344	6.51614	8.22495	0.0128995	0.564598
	314	0.623561	0.459866	0.872017	1.05888	0.47856	0.73574	0.788229	0.858276	0.842643	1.31496	-0.0199235	1.36354	2.80409	12.4368	0.749418	1.24638	9.21292	0.0846682	-0.087966
	315	0.632676	0.390505	0.898468	1.23538	0.447033	0.784175	0.893203	0.895382	1.02146	1.20134	1.96453	1.3086	1.87038	13.4773	0.877137	1.79356	12.8681	0.083356	0.728228
	316	0.649077	0.426335	0.890561	1.19674	0.472356	0.732295	0.784074	0.856277	0.838855	1.20896	1.57045	1.17273	2.31771	21.7536	0.829508	13.2123	2.72762	0.0212434	0.0331051
	317	0.606356	0.425913	0.869393	1.10197	0.450347	0.75018	0.800871	0.866591	0.852168	1.2672	-3.3261	1.55206	2.15728	16.2826	0.968064	7.11337	8.44189	0.0878332	0.0623921
	318	0.631324	0.391848	0.888123	1.28774	0.476033	0.775584	0.795093	0.882605	0.832056	1.18959	1.52151	1.13814	1.75494	20.1196	0.454482	5.09772	6.48985	0.00513495	0.299793
	319	0.600743	0.429416	0.850154	1.13041	0.465112	0.834772	0.895623	0.926046	1.07366	1.10334	-2.93538	2.30789	2.69109	11.6669	1.62196	6.24961	8.14879	0.0777568	0.250732
	320	0.607633	0.411051	0.858345	1.20647	0.466928	0.815508	0.887325	0.917427	1.07666	1.08861	-2.55275	2.74861	2.89988	14.6376	0.718364	7.96947	9.42964	0.0597427	-0.534217
	321	0.615131	0.394996	0.888723	1.17931	0.432996	0.817763	0.898151	0.916184	1.05786	1.16594	-0.557358	1.79686	1.83208	11.6061	1.23591	11.7084	7.77022	0.0630814	0.656701
	322	0.618265	0.349911	0.905084	1.35708	0.465116	0.786359	0.843822	0.887116	0.89207	1.07761	3.41633	1.30296	2.62417	19.925	0.913161	4.02678	15.4626	0.0739782	-0.0919477
	323	0.617823	0.409883	0.879791	1.16561	0.446502	0.790493	0.879321	0.891273	0.947637	1.13394	-0.767216	1.57949	2.69141	17.3309	1.60776	6.90342	16.808	0.0425253	-0.0829259
	324	0.662302	0.486749	0.879613	1.09682	0.510553	0.80887	0.902739	0.908298	1.03241	1.13345	1.00604	2.21948	2.63704	14.7686	0.773292	18.184	2.57336	0.0977963	-0.185453
	325	0.605189	0.362492	0.886913	1.29475	0.446149	0.832627	0.908743	0.921435	1.04643	1.04983	3.41865	2.05203	2.95755	11.5162	1.49653	15.0521	5.91305	0.00225786	-0.26083
	326	0.645092	0.470216	0.881334	1.07588	0.489283	0.78439	0.88196	0.888916	0.960077	1.18613	1.80657	1.59237	2.87801	18.3129	0.677805	7.20184	14.2512	0.0116302	-0.0414593
	327	0.612855	0.392044	0.879375	1.21765	0.445304	0.789673	0.891305	0.893502	0.978257	1.19898	1.11354	1.04432	2.80933	14.2691	1.09042	6.8451	18.0795	0.098515	0.603619
	328	0.608211	0.323549	0.916373	1.41505	0.472435	0.69826	0.820769	0.874309	1.12777	1.00339	-1.84227	1.26241	2.02559	16.3494	1.04616	3.66681	2.87243	0.0243587	0.984574
	329	0.601925	0.355527	0.896066	1.26369	0.421197	0.774195	0.853836	0.880899	0.915272	1.14723	-1.00942	1.88973	2.32412	20.79	0.875514	10.3891	9.90328	0.0339925	-0.867021
	330	0.608369	0.369145	0.893366	1.24041	0.42658	0.791994	0.865428	0.890821	0.921326	1.16279	2.71218	1.61279	2.95363	10.6002	2.10978	7.36022	5.80421	0.0471936	-0.343647
	331	0.623307	0.436377	0.867088	1.14093	0.470714	0.79261	0.888236	0.903743	1.05679	1.16528	2.63632	2.53343	2.57953	21.7148	0.698758	3.56365	3.16947	0.0615159	-0.900697
	332	0.606462	0.34069	0.901565	1.37455	0.466414	0.724987	0.747059	0.91246	1.23731	0.971472	-0.540523	1.92427	2.54824	9.33702	1.5243	9.19293	3.11153	0.0796631	0.83693
	333	0.609227	0.366703	0.887783	1.28908	0.447817	0.840521	0.903855	0.927336	1.06296	1.07396	2.37923	2.8119	1.1725	21.6693	0.500131	11.2931	14.8916	0.0540242	0.341127
	334	0.606718	0.419476	0.874986	1.10729	0.443341	0.784918	0.823846	0.886641	0.865167	1.28469	-3.53019	1.82678	1.47106	19.7534	0.928145	1.89546	2.50958	0.0472033	0.368655
	335	0.602831	0.364814	0.889839	1.24958	0.426383	0.852928	0.909433	0.933113	1.06106	1.11766	0.584293	2.04231	2.48905	7.63919	1.31165	4.70292	14.5466	0.0257587	0.425832
	336	0.600052	0.361978	0.891014	1.24477	0.420965	0.788459	0.86401	0.888891	0.921591	1.13286	-1.4938	1.87031	2.45102	15.0941	1.54999	18.8576	1.68805	0.0180484	-0.586752
	337	0.612969	0.351282	0.90144	1.32518	0.447388	0.811641	0.906598	0.908313	1.01782	1.0689	2.16787	1.1409	2.69986	21.9784	1.46049	1.90247	17.3141	0.0066571	0.57009
	338	0.651792	0.47809	0.881558	1.07697	0.497568	0.813387	0.90751	0.908012	1.00963	1.17268	0.882037	2.23142	2.67066	11.4135	0.75285	7.32865	3.01069	0.0357562	-0.184479
	339	0.662357	0.49598	0.880567	1.0704	0.515423	0.779895	0.852347	0.883818	0.908878	1.20208	-3.23492	1.83535	2.17764	19.5912	0.649272	1.23337	3.00716	0.0685333	0.12922
	340	0.623867	0.522576	0.860813	0.955881	0.545451	0.702398	0.772317	0.838435	0.839574	1.34545	-1.93549	1.47336	2.95058	17.0787	0.333771	4.62006	1.62697	0.00646792	-0.161026
	341	0.610315	0.413037	0.865136	1.17696	0.456842	0.748959	0.742282	0.871024	0.776877	1.41577	-0.310229	1.05689	1.88971	11.3712	0.393412	6.71452	7.06776	0.0818869	0.392895
	342	0.641435	0.412506	0.884605	1.25802	0.484965	0.831023	0.916159	0.916474	1.00726	1.05013	-3.47708	2.31082	2.39215	14.288	0.913471	19.6968	1.32731	0.0731953	0.0344617
	343	0.613905	0.395544	0.880179	1.2036	0.443622	0.841657	0.895223	0.918089	0.934664	1.18288	-3.04586	1.753	2.22898	9.846	0.727838	3.27638	15.2022	0.0982605	0.391725
	344	0.622589	0.363329	0.901365	1.31059	0.453052	0.735915	0.858753	0.880825	1.07582	1.15279	2.88108	1.19331	1.77426	14.7503	0.797475	17.0315	2.73741	0.0142209	0.916451
	345	0.617889	0.445646	0.872667	1.07598	0.465845	0.818312	0.905052	0.907852	0.977114	1.2286	3.11789	1.43123	2.7141	13.7409	0.923963	12.2363	6.00564	0.00777318	0.326249
	346	0.617273	0.379537	0.898576	1.21423	0.426596	0.709599	0.823499	0.879745	1.12919	1.22394	2.09842	1.62503	1.25486	17.5668	1.25357	3.64483	2.09521	0.00596906	1.02565
	347	0.628966	0.430864	0.883398	1.12588	0.457345	0.782299	0.856494	0.88527	0.913797	1.18811	-2.38818	1.85686	2.45511	14.2465	1.20071	17.6717	1.47818	0.0539028	-0.20346
	348	0.644255	0.442327	0.877082	1.17313	0.484328	0.776427	0.857452	0.882628	0.919106	1.21771	-0.904101	1.03302	2.91823	14.1289	0.895595	14.2681	1.0423	0.0537227	0.573006
	349	0.600985	0.412178	0.874627	1.11099	0.436531	0.703251	0.791493	0.887845	1.17577	1.19651	-1.96036	2.10124	1.3086	21.4975	1.17687	10.2031	3.38377	0.0717226	0.996152
	350	0.617213	0.388837	0.896802	1.18403	0.426411	0.775655	0.841315	0.881218	0.894778	1.25864	2.85947	1.74836	1.43176	16.8999	1.18916	17.9591	2.94945	0.0906381	0.152277
	351	0.617177	0.386737	0.88903	1.22011	0.43846	0.798334	0.860607	0.915594	1.11093	1.11887	-0.182834	1.70818	2.22467	9.56645	1.24049	9.99358	5.04973	0.0072322	0.736969
	352	0.600975	0.333774	0.902645	1.36439	0.450823	0.748954	0.867658	0.885033	1.06555	1.04325	-1.45075	1.1228	2.43488	19.4781	1.00612	7.1446	19.6027	0.0292647	0.797838
	353	0.601859	0.359421	0.884574	1.31284	0.453055	0.74255	0.872458	0.872485	1.00263	1.14704	0.920251	0.909693	2.4841	21.2682	1.00136	8.76371	12.2302	0.0341986	0.795771
	354	0.625727	0.373589	0.905104	1.2506	0.433797	0.819284	0.879917	0.90578	0.925552	1.17391	0.116156	2.06239	2.72564	9.93143	0.41557	5.86742	15.8374	0.0071456	-0.738878
	355	0.613937	0.384428	0.882196	1.24763	0.448883	0.824521	0.911628	0.911988	0.992034	1.09128	-1.7445	2.79083	1.18701	21.8269	0.984991	1.65959	2.45763	0.0104918	0.211553
	356	0.611618	0.337419	0.909716	1.35693	0.449125	0.756933	0.773284	0.872376	0.812618	1.13244	-0.987543	1.44218	2.32136	12.5104	0.606837	19.7688	7.94422	0.0929061	-0.422114
	357	0.610017	0.362144	0.902572	1.24318	0.418423	0.826473	0.855379	0.909929	0.886852	1.30069	1.2427	1.58348	1.87244	8.26026	0.800509	13.7999	2.96895	0.0109823	0.374711
	358	0.611174	0.382479	0.892875	1.1977	0.424873	0.815253	0.845755	0.903745	0.879474	1.29784	1.6094	1.41366	2.39061	8.17259	1.03765	12.816	7.56505	0.0724945	0.292897
	359	0.633654	0.450608	0.879574	1.09544	0.472534	0.812171	0.89585	0.913427	1.0579	1.15661	0.513707	1.72992	2.11274	17.4724	1.81258	6.8707	1.63571	0.0541451	0.482889
	360	0.606012	0.400764	0.87859	1.1556	0.434197	0.806424	0.86785	0.898804	0.915012	1.25478	0.462729	1.16667	2.71799	10.9722	1.81744	6.68696	7.65782	0.0903718	0.444366
	361	0.602938	0.335434	0.903006	1.36428	0.452699	0.848736	0.878995	0.936913	1.10326	1.03141	2.86401	2.06544	2.44775	7.81077	1.56601	10.5963	2.07512	0.0994184	0.516885
	362	0.646885	0.429159	0.890097	1.17792	0.468847	0.798481	0.880492	0.89539	0.942216	1.18552	2.62837	1.15499	2.73265	20.5259	1.56519	16.3336	1.97446	0.0813727	0.395346
	363	0.602434	0.348223	0.898275	1.29506	0.427807	0.810272	0.880098	0.901279	0.931952	1.11263	-0.168509	1.21636	1.99467	21.7214	1.39685	19.9501	12.4903	0.050908	0.425008
	364	0.627696	0.379103	0.8926	1.3183	0.477826	0.763026	0.763379	0.877568	0.797515	1.16655	0.683508	1.03025	2.41087	13.5575	0.960953	1.03133	4.45046	0.0876119	0.222131
	365	0.623913	0.448155	0.863361	1.1184	0.478612	0.831581	0.861906	0.931825	1.12009	1.11044	2.16242	2.05607	2.47839	13.553	1.4746	2.82573	9.54351	0.0626662	0.375033
	366	0.619585	0.417427	0.87319	1.16965	0.457295	0.782684	0.848635	0.885513	0.900985	1.22527	-1.40814	1.01251	2.82445	16.3697	1.17574	16.4899	3.975	0.0493851	0.511475
	367	0.667423	0.44263	0.893593	1.20674	0.493448	0.831624	0.91033	0.920543	1.04156	1.07164	0.132374	1.72206	2.18275	20.9998	0.801749	8.43935	8.18634	0.0523466	0.376756
	368	0.635642	0.356291	0.915961	1.40322	0.505318	0.848526	0.92349	0.926676	1.02185	0.970532	-1.66655	1.67723	2.06223	17.7706	0.476545	2.53797	8.9085	0.0133792	0.489936
	369	0.602797	0.366627	0.892919	1.22851	0.419072	0.78717	0.873448	0.889	0.939218	1.19857	3.01155	1.90418	2.77773	12.0849	1.35293	12.6031	2.50823	0.0616351	-0.821755
	370	0.685232	0.473796	0.888931	1.20675	0.529036	0.71032	0.727159	0.912216	1.25833	1.01917	-1.10513	1.97937	2.51547	20.0318	0.651277	5.7527	5.10272	0.0485523	0.757083
	371	0.600236	0.508166	0.860439	0.923813	0.534577	0.75085	0.832023	0.898783	1.13406	1.25719	2.97838	1.70536	2.86242	17.147	0.914445	3.28467	2.5773	0.0746375	0.593298
	372	0.609881	0.434326	0.882629	1.05714	0.449595	0.802587	0.89953	0.900477	0.986237	1.2193	2.17833	1.71893	2.02168	20.9809	0.752959	17.6773	15.9453	0.00658899	0.164938
	373	0.655298	0.403809	0.901533	1.28222	0.484149	0.768088	0.838669	0.905839	1.131	1.04234	-0.890476	1.55105	2.54553	12.1757	0.757726	9.38683	10.7815	0.082918	0.746353
	374	0.605359	0.40721	0.856335	1.2275	0.47179	0.812495	0.779515	0.941976	1.21271	1.03592	2.84494	2.51966	2.55941	10.5983	1.42718	9.60412	8.16424	0.0922257	0.405869
	375	0.677817	0.433342	0.90213	1.2667	0.509699	0.743927	0.811054	0.901746	1.16139	1.03533	-2.28224	1.65273	2.42422	15.9384	0.420123	15.8988	8.62308	0.0544667	0.815339
	376	0.60705	0.367354	0.889478	1.26045	0.434147	0.826945	0.891307	0.910268	0.938662	1.10507	-2.84226	1.74148	1.68544	19.7484	1.06802	18.6735	10.0063	0.0528161	0.345191
	377	0.637721	0.387952	0.896588	1.29375	0.473101	0.793698	0.840449	0.918268	1.13703	1.03898	2.96233	1.50469	2.85992	12.9628	1.0523	6.99977	8.76822	0.0214893	0.677423
	378	0.605601	0.384905	0.878033	1.2199	0.438654	0.843366	0.917823	0.920655	0.978613	1.14351	-3.40408	2.24722	1.99168	10.6135	0.608812	8.15048	18.1204	0.066533	0.257908
	379	0.633851	0.379125	0.898262	1.36056	0.504892	0.857591	0.904036	0.936381	1.07184	0.959904	1.30109	2.04104	2.97442	15.1262	0.99353	5.14295	4.23473	0.0630342	0.160654
	380	0.606975	0.3751	0.900147	1.18733	0.412261	0.825103	0.911831	0.912403	0.989979	1.28836	1.89434	2.0129	1.29167	13.5639	0.527376	13.6676	13.6386	0.0661753	0.622252
	381	0.603736	0.465061	0.854114	1.02983	0.486203	0.806423	0.896632	0.909367	1.0497	1.18053	-1.68858	2.67908	2.37601	13.1393	0.832319	7.59858	4.69318	0.0499294	-0.201246
	382	0.622888	0.439909	0.88672	1.07156	0.456172	0.82437	0.913171	0.913283	1.0044	1.32622	0.521082	1.83852	2.2172	8.51233	0.721826	16.904	2.31388	0.0937702	0.54515
	383	0.617845	0.391497	0.881113	1.23932	0.453311	0.74603	0.773163	0.865497	0.817342	1.2313	1.80029	1.05432	2.3261	18.2905	0.676935	7.60215	16.8268	0.0296795	0.120316
	384	0.611244	0.429852	0.875521	1.09054	0.451022	0.811142	0.894307	0.91336	1.06054	1.18544	2.55276	1.43547	2.71506	17.2348	1.34915	5.96428	15.015	0.00999434	0.492769
	385	0.628929	0.451111	0.873266	1.0963	0.474697	0.787959	0.878729	0.904699	1.075	1.17687	0.662666	1.48444	2.4376	17.8283	0.923995	3.99592	15.2404	0.0924352	0.576756
	386	0.635449	0.427336	0.881608	1.16919	0.465863	0.762762	0.876301	0.890075	1.05673	1.14813	-0.924687	1.20565	2.82489	16.4872	1.05656	16.4017	7.14006	0.0260748	0.697672
	387	0.617021	0.395094	0.889056	1.18531	0.434965	0.769563	0.826582	0.877716	0.877035	1.22251	1.64545	1.27216	1.87705	21.165	1.17514	8.03114	5.81322	0.01072	0.196685
	388	0.624382	0.438247	0.876613	1.10762	0.462636	0.802018	0.871592	0.89661	0.923848	1.25884	-0.637097	1.32416	2.34238	13.0071	0.586265	9.30974	14.2238	0.0655562	0.410784
	389	0.654773	0.41155	0.894692	1.30003	0.50486	0.854042	0.89383	0.936553	1.08513	0.999798	2.3086	1.88313	2.81696	15.7664	1.12585	2.33127	4.95824	0.0896411	0.293526
	390	0.600118	0.378017	0.881662	1.20949	0.426436	0.820674	0.887184	0.907075	0.936027	1.24247	2.89243	1.11895	2.93706	9.63784	1.59149	11.551	9.55632	0.0398033	0.514253
	391	0.600805	0.330339	0.904692	1.39384	0.466845	0.764628	0.784301	0.919403	1.20008	0.957229	-0.660862	1.87204	2.79673	9.51541	1.02989	14.5693	8.54211	0.029696	0.728526
	392	0.612932	0.405815	0.879707	1.16096	0.440824	0.701545	0.791262	0.887084	1.17556	1.15241	-0.927795	1.53241	2.02549	14.4064	1.39291	1.44125	15.3354	0.0663509	0.899596
	393	0.602785	0.323966	0.912852	1.36981	0.44083	0.777656	0.815153	0.882557	0.857256	1.07721	0.578406	1.31658	1.84496	19.1957	1.55677	2.7221	5.09743	0.0175183	0.0863307
	394	0.631755	0.555242	0.841674	0.967615	0.585641	0.797179	0.794618	0.931212	1.19352	1.1284	1.99855	2.60576	2.76921	21.6748	0.526765	8.79762	2.19565	0.0931981	0.226095
	395	0.644824	0.418274	0.887957	1.22349	0.474734	0.742306	0.855769	0.886017	1.08838	1.09919	-1.59531	1.20731	2.9448	16.5356	1.16978	10.7657	4.14476	0.0314864	0.787094
	396	0.628653	0.399119	0.888062	1.22496	0.45418	0.831269	0.916254	0.916254	1.00022	1.09683	-2.22518	1.4634	2.50477	14.5025	1.40133	11.5731	6.66775	0.0544579	0.525429
	397	0.622265	0.382343	0.887604	1.2828	0.462513	0.834507	0.917947	0.918251	1.00706	1.04193	2.42346	1.63681	2.67439	15.7423	1.79127	12.4061	6.6995	0.0873849	0.173682
	398	0.632293	0.376357	0.900882	1.29594	0.460069	0.755398	0.7735	0.871335	0.813593	1.13869	-2.1092	1.36879	2.75076	12.3917	1.21747	2.92464	2.1221	0.0869376	-0.24681
	399	0.603071	0.385881	0.876534	1.20933	0.436016	0.779586	0.785726	0.886069	0.818525	1.31292	-1.75242	1.09397	1.87618	12.2164	0.753307	19.1458	2.28277	0.0353735	0.500937
	400	0.6121	0.503024	0.871839	0.939277	0.523689	0.791748	0.893235	0.894648	0.982686	1.26413	0.257463	1.85948	2.52907	14.6198	0.73421	15.0299	2.03384	0.09439	0.204248
	401	0.63257	0.389493	0.899097	1.23659	0.446321	0.825496	0.913618	0.913756	1.00488	1.15071	3.39903	1.78728	1.42167	20.8549	0.901643	15.6808	6.42187	0.0585769	0.477329
	402	0.619882	0.364537	0.899164	1.29858	0.448191	0.760047	0.863003	0.893833	1.08658	1.0951	2.81464	1.14125	2.55876	18.8795	2.53284	4.70562	4.91971	0.09594	0.776997
	403	0.643812	0.430315	0.8873	1.17173	0.468636	0.826438	0.894134	0.910296	0.943779	1.16481	-1.20095	1.41892	2.69418	11.3177	0.729501	9.47638	14.2452	0.0543418	0.365274
	404	0.623679	0.497268	0.868453	0.985341	0.515005	0.740603	0.836969	0.891849	1.12199	1.25522	0.652929	1.57722	2.98962	11.9453	0.440463	5.43538	13.3816	0.0645838	0.675374
	405	0.636159	0.366011	0.910837	1.31867	0.459222	0.743704	0.779973	0.863455	0.827468	1.16721	2.00354	1.33732	1.89134	16.5239	0.865892	4.9934	4.75743	0.0837661	-0.124136
	406	0.629418	0.364385	0.906691	1.31257	0.454474	0.778385	0.836156	0.882585	0.885725	1.11327	3.11898	1.40245	2.48174	16.1828	1.11317	16.3001	1.5305	0.0064012	-0.244433
	407	0.62342	0.416643	0.880425	1.16178	0.452428	0.78043	0.881404	0.887099	0.963689	1.16323	0.187906	2.00502	2.18513	19.7622	0.943956	4.58006	11.1967	0.0763054	-0.476401
	408	0.628707	0.375913	0.904408	1.25677	0.439271	0.76977	0.820144	0.877787	0.868044	1.19975	3.15132	1.47889	1.94532	13.8295	0.770011	9.06394	8.24429	0.0212087	-0.0787393
	409	0.611658	0.502789	0.842571	1.00137	0.528372	0.70483	0.694189	0.92052	1.2953	1.13173	2.52392	2.16476	2.86214	16.4589	1.09269	9.61596	1.96068	0.027838	0.692909
	410	0.61261	0.364435	0.89777	1.26432	0.431119	0.807543	0.825533	0.900084	0.856977	1.33654	3.54607	1.4622	2.38377	6.98666	1.00022	12.3349	2.20632	0.0423338	0.189353
	411	0.642212	0.412468	0.892734	1.21123	0.462349	0.828118	0.913481	0.917056	1.02461	1.10274	-0.054422	1.44133	2.63718	14.0025	1.18679	1.4496	18.1876	0.0263785	0.476918
	412	0.661519	0.419131	0.90578	1.21432	0.4684	0.747519	0.84157	0.894162	1.11789	1.19521	3.12933	1.66702	1.71286	12.0961	0.362314	5.3827	12.7574	0.0282901	0.8537
	413	0.622945	0.433095	0.877271	1.11603	0.458839	0.815541	0.904673	0.906778	0.980075	1.21057	-1.26734	1.3824	2.88211	10.4824	1.17138	5.84819	9.80495	0.0477882	0.505366
	414	0.624442	0.385164	0.892901	1.24574	0.446678	0.806959	0.85806	0.89868	0.900595	1.1029	-1.78738	1.52538	2.79643	11.3392	1.88933	1.04108	8.17339	0.0175288	0.0386432
	415	0.618184	0.371709	0.889561	1.31847	0.469781	0.832444	0.911025	0.920877	1.04069	1.02063	-3.26969	1.44335	2.88352	20.203	1.16412	18.3031	7.87031	0.0886139	0.605725
	416	0.635389	0.437578	0.88337	1.12829	0.464968	0.827869	0.887946	0.924387	1.0827	1.20933	-3.59636	2.38388	2.03232	9.48362	0.490766	14.0791	4.24723	0.086865	0.71929
	417	0.605678	0.376248	0.882052	1.24384	0.438128	0.741239	0.737869	0.866157	0.774615	1.31818	0.660139	1.1642	2.51438	8.81246	0.669344	10.6848	11.2606	0.0936374	-0.00279078
	418	0.673615	0.438596	0.897552	1.2394	0.502639	0.776422	0.824143	0.881525	0.870042	1.09703	-2.1007	1.39174	2.92744	20.7547	0.748175	6.53807	3.42257	0.0357343	-0.0396685
	419	0.617237	0.378945	0.888035	1.2645	0.449352	0.818872	0.881497	0.921056	1.08838	1.05695	1.08549	1.5265	2.52718	14.1105	1.69188	9.43864	9.66669	0.046574	0.584472
	420	0.614154	0.437826	0.877476	1.07287	0.456202	0.767667	0.873647	0.894402	1.06938	1.20901	-1.79467	1.54693	1.95743	20.9569	1.00012	5.15896	11.6819	0.0291505	0.699387
	421	0.601915	0.343177	0.898041	1.3277	0.439972	0.840756	0.918725	0.919869	0.98641	1.04208	1.86776	1.42757	2.40534	17.2705	1.42582	15.1312	12.5501	0.0268946	0.327161
	422	0.611976	0.390748	0.886989	1.18875	0.431852	0.810226	0.900551	0.910773	1.04392	1.13543	-0.639222	1.40976	2.17625	15.2854	1.4761	19.9666	5.92352	0.00647912	0.609118
	423	0.617555	0.416597	0.879307	1.1427	0.447342	0.792435	0.882023	0.892529	0.951332	1.16222	0.390157	1.72863	2.29224	13.9095	2.37632	3.34258	7.02378	0.0816609	0.0248446
	424	0.613697	0.332358	0.914302	1.40854	0.478944	0.844512	0.919315	0.921471	0.981474	0.978621	-2.20904	1.40647	2.43328	21.2477	1.23585	14.3826	1.49814	0.0999118	0.496663
	425	0.664183	0.421877	0.900907	1.24166	0.48424	0.797461	0.893461	0.905274	1.04876	1.09067	0.325841	1.37654	2.41438	16.1249	0.869516	9.38272	6.81267	0.0693399	0.625762
	426	0.610466	0.384725	0.887359	1.20523	0.431003	0.820749	0.888644	0.906921	0.938874	1.16786	-2.30367	2.13489	2.47399	8.8953	1.68892	4.00246	3.83738	0.0872761	-0.103158
	427	0.60962	0.361442	0.897792	1.26426	0.427746	0.778456	0.865457	0.883937	0.931946	1.17086	3.22936	1.79136	2.71209	15.4663	1.1323	15.4096	3.96395	0.0928379	-0.849737
	428	0.630196	0.457425	0.866049	1.10562	0.484937	0.823248	0.907479	0.916094	1.03898	1.11233	-1.05592	2.15358	2.47603	13.0299	1.61885	9.48689	1.2867	0.0328141	0.1224
	429	0.612855	0.36118	0.898522	1.27905	0.434381	0.826153	0.872314	0.909428	0.909997	1.11684	0.211561	1.34204	2.4479	11.0917	1.63	9.16133	6.10516	0.0328778	0.304137
	430	0.628994	0.470807	0.873802	1.04442	0.487999	0.744605	0.867248	0.882227	1.06126	1.24703	1.14332	1.2847	2.67572	18.9342	1.20988	2.08952	5.23483	0.092373	0.669934
	431	0.609845	0.349043	0.90532	1.29429	0.427136	0.834994	0.912687	0.916303	0.975134	1.15588	3.42721	1.59078	1.59558	13.3483	1.61492	6.6454	4.99238	0.0843866	0.521363
	432	0.601641	0.396928	0.8594	1.23991	0.464864	0.790136	0.748327	0.940373	1.24451	1.0108	-3.48331	2.54117	2.57844	16.6928	0.819187	11.0036	19.0612	0.0065403	0.568659
	433	0.644826	0.438147	0.883708	1.16231	0.474824	0.817566	0.883829	0.91974	1.08399	1.10356	1.55867	1.5416	2.97658	14.0986	2.0238	7.22734	3.35284	0.060584	0.519055
	434	0.649655	0.391075	0.904707	1.29752	0.477322	0.722058	0.808058	0.891728	1.15849	1.04257	-0.741351	1.44703	2.65401	10.9676	1.06565	9.9209	2.98725	0.0413145	0.865893
	435	0.63267	0.422789	0.88509	1.16081	0.457682	0.769659	0.874672	0.895231	1.06878	1.18396	3.32511	1.19716	2.58319	19.2715	1.92832	8.58343	1.72802	0.0263019	0.702386
	436	0.645975	0.397167	0.903259	1.24751	0.458901	0.809706	0.88966	0.913937	1.06905	1.10751	1.0153	1.7054	1.7634	13.5703	1.21855	4.53195	2.11962	0.0387743	0.685593
	437	0.618244	0.357653	0.900002	1.33412	0.460578	0.774616	0.817834	0.880666	0.862363	1.08917	1.58318	1.15507	2.905	21.9161	0.931464	5.02658	19.8789	0.03369	-0.00837787
	438	0.613021	0.403525	0.875168	1.18671	0.447425	0.798896	0.825426	0.895051	0.860494	1.25978	-1.29238	1.14815	2.6451	10.1319	0.71933	1.10295	18.7777	0.0446375	0.381024
	439	0.617887	0.386817	0.881506	1.26523	0.459994	0.78931	0.892788	0.893883	0.984713	1.12394	-2.1962	1.10726	2.99818	12.8379	1.09821	2.35617	13.9897	0.0398567	0.689557
	440	0.627182	0.493741	0.866554	1.00618	0.511685	0.808277	0.891656	0.91238	1.06373	1.17978	-2.11393	1.90053	2.28674	20.7513	1.09024	3.53545	1.41707	0.0316959	0.501018
	441	0.64588	0.365858	0.916747	1.35473	0.480988	0.781481	0.853191	0.908679	1.11495	1.05615	3.21115	1.68819	1.70839	12.9587	0.761106	6.84779	1.74537	0.0413355	0.808179
	442	0.621992	0.367774	0.902781	1.27115	0.437209	0.791329	0.832769	0.890084	0.873965	1.16191	1.54885	1.45645	2.31098	10.5667	1.18881	14.4225	8.45244	0.0737546	0.0421972
	443	0.622087	0.333832	0.919933	1.40379	0.476244	0.74298	0.867546	0.880935	1.05803	1.05698	-0.354843	1.44745	1.31479	21.2728	0.648588	4.59372	4.06273	0.0554055	0.889148
	444	0.640804	0.359485	0.916821	1.38121	0.492047	0.836996	0.913757	0.917311	0.975495	1.00961	-0.102101	1.39529	2.16402	16.6816	0.72911	12.958	1.65963	0.0174461	0.480588
	445	0.609539	0.358718	0.899296	1.2707	0.427443	0.708031	0.823107	0.878982	1.12902	1.1173	-1.40064	1.34772	1.84771	14.3817	2.01005	12.9691	3.30542	0.0953578	0.982377
	446	0.623704	0.352611	0.911646	1.31697	0.442473	0.708717	0.811865	0.883533	1.14775	1.1053	0.647157	1.57496	1.53437	13.3665	0.797717	14.5089	4.89971	0.0277902	1.00133
	447	0.603068	0.364032	0.885906	1.27577	0.438404	0.799557	0.851538	0.894756	0.895288	1.18339	3.61379	0.961094	2.84869	18.6275	1.96612	18.877	5.91602	0.0555961	0.404277
	448	0.61283	0.346471	0.905234	1.33014	0.444008	0.777972	0.873966	0.900546	1.07742	1.06373	0.599591	1.27056	2.0392	18.9429	1.07226	15.2557	13.3762	0.0013002	0.728953
	449	0.660949	0.491184	0.886148	1.06098	0.507849	0.786851	0.893628	0.897437	1.02821	1.21223	-0.729851	1.55495	2.27419	15.8974	0.398385	4.02133	12.9636	0.0445704	0.547415
	450	0.605225	0.440273	0.87595	1.04337	0.455918	0.767562	0.87903	0.891928	1.05435	1.27473	2.71673	1.36848	2.29772	17.0603	2.37152	1.50598	2.39819	0.0732833	0.65298
	451	0.636085	0.453739	0.859482	1.17729	0.502783	0.816687	0.861191	0.924342	1.11638	1.04346	1.88585	2.3552	2.72612	16.3833	1.63578	5.29371	1.22557	0.0592712	0.0321983
	452	0.613142	0.394186	0.8919	1.16479	0.427139	0.776823	0.83397	0.881873	0.88333	1.24598	0.0220756	1.47021	1.55445	20.3041	1.06008	14.0459	8.99431	0.0671484	0.267134
	453	0.605013	0.409441	0.857645	1.20176	0.463541	0.808466	0.894468	0.911317	1.0572	1.07977	-0.445184	2.36645	2.50324	20.8906	1.36992	7.13833	6.17576	0.0911453	-0.47412
	454	0.623587	0.355682	0.906065	1.34065	0.461223	0.827385	0.883288	0.910077	0.925599	1.04402	-2.14422	1.86684	2.49591	10.9681	0.865668	18.7805	6.82763	0.0833758	-0.0745829
	455	0.643136	0.424063	0.882184	1.21975	0.480834	0.753809	0.779554	0.869891	0.822044	1.17381	-2.9451	1.20741	2.31216	21.8396	0.896174	7.9372	1.47976	0.0334096	0.209307
	456	0.610374	0.453936	0.870172	1.03801	0.470958	0.779153	0.882746	0.886914	0.969013	1.23176	2.30832	1.78469	2.42464	14.8827	1.04473	18.8535	8.30789	0.0773497	0.0034846
	457	0.646168	0.423089	0.896104	1.17385	0.459807	0.785845	0.857691	0.887319	0.91308	1.19416	2.1485	1.31011	2.15682	19.571	1.77241	7.1005	1.69451	0.0789678	0.253485
	458	0.616154	0.381375	0.883865	1.27041	0.455862	0.712659	0.706875	0.919777	1.28193	1.02552	2.31763	2.07007	1.88917	16.5666	1.10107	3.42932	17.5932	0.00647076	0.839204
	459	0.63145	0.410263	0.881185	1.22354	0.467363	0.803668	0.859466	0.897144	0.904237	1.17766	0.723689	1.05153	2.95452	13.8901	0.907077	3.78075	8.04182	0.0117476	0.445028
	460	0.60015	0.404729	0.884305	1.10645	0.425865	0.791978	0.841023	0.890434	0.884809	1.3242	0.736901	1.60007	1.74273	12.5843	1.01132	19.0973	4.6501	0.085768	0.274464
	461	0.616584	0.444082	0.849791	1.15643	0.488128	0.81273	0.893988	0.914024	1.06202	1.07784	-2.61729	2.17824	2.48385	19.4892	0.740422	11.9659	16.914	0.0823982	0.1032
	462	0.614486	0.354406	0.898288	1.35714	0.471894	0.847358	0.91705	0.927994	1.04118	1.01121	2.29175	1.93764	1.67577	20.2667	0.957341	2.77584	9.5822	0.0694386	0.361021
	463	0.623604	0.390246	0.892325	1.22074	0.441897	0.79817	0.8773	0.895115	0.936326	1.21883	-0.468532	1.21565	1.9766	13.3633	0.816178	1.60548	17.0497	0.0399998	0.5777
	464	0.605705	0.421802	0.872627	1.10319	0.445526	0.836225	0.899623	0.915614	0.945644	1.30896	1.60764	1.45047	2.97162	7.91014	0.60452	18.8348	11.2197	0.0141226	0.399219
	465	0.625769	0.400716	0.893847	1.18247	0.439129	0.82955	0.891877	0.911696	0.937606	1.19944	-0.384979	1.77601	1.85814	11.1512	0.878998	11.1717	9.1984	0.0941819	0.319273
	466	0.61508	0.368015	0.892044	1.29214	0.450085	0.821005	0.897838	0.907762	0.956078	1.06086	-1.21898	1.9618	1.79132	14.9604	1.51815	6.42168	4.63941	0.0906713	0.103866
	467	0.635017	0.467188	0.876457	1.06484	0.485781	0.822887	0.882934	0.922803	1.08801	1.16861	2.27365	1.76465	2.62858	13.6407	0.792866	14.2415	9.02388	0.0192535	0.459426
	468	0.624251	0.412903	0.887752	1.15353	0.444561	0.81876	0.902758	0.907462	0.970122	1.22612	0.0731087	2.49289	2.87315	9.51983	0.581273	1.91379	4.51389	0.00315023	-0.913189
	469	0.603552	0.356583	0.893732	1.27781	0.429462	0.822754	0.912282	0.912305	1.00199	1.16271	-1.72961	1.51529	2.43656	7.78769	0.957758	5.87589	14.0336	0.0977295	0.660668
	470	0.606498	0.40985	0.870384	1.15192	0.444666	0.815651	0.838422	0.904356	0.869771	1.35942	2.47831	1.15681	2.99542	7.76458	0.870482	18.4289	1.52246	0.0110781	0.423556
	471	0.652881	0.405974	0.898901	1.27058	0.480932	0.778232	0.886791	0.895335	1.04315	1.11668	3.32202	1.16245	2.4893	21.9188	1.01502	4.30338	7.165	0.0775581	0.67341
	472	0.619653	0.369843	0.892139	1.32286	0.469693	0.775535	0.887708	0.88787	0.99398	1.1185	2.38607	0.954838	2.97933	17.3204	1.29939	13.1135	3.71503	0.0731844	0.713951
	473	0.601221	0.337928	0.900082	1.35068	0.44739	0.784101	0.815596	0.886524	0.854645	1.13944	2.81952	1.00089	2.24007	20.2985	2.3262	7.05464	2.18043	0.0927947	0.314104
	474	0.627388	0.353804	0.909677	1.37014	0.478072	0.816612	0.83661	0.904831	0.867188	1.06103	-0.148351	1.3923	2.61741	10.2323	0.435248	19.7625	14.8313	0.0748822	0.12407
	475	0.614063	0.386024	0.87631	1.28845	0.472303	0.758935	0.759988	0.923639	1.22754	1.01242	3.51335	1.67417	2.80625	19.6149	1.60578	3.60995	13.025	0.0779406	0.694598
	476	0.603097	0.408407	0.87598	1.12663	0.435582	0.785407	0.881714	0.902298	1.06668	1.20044	-1.71413	1.4757	2.55251	10.2185	2.15415	10.0057	3.33802	0.0552447	0.742627
	477	0.633717	0.383622	0.898468	1.27654	0.458578	0.780203	0.790575	0.885812	0.824444	1.18252	-0.509982	1.35146	2.18346	10.8042	0.411511	17.4239	15.2691	0.0405817	0.0871385
	478	0.621968	0.378215	0.901851	1.22706	0.429539	0.779209	0.796644	0.884676	0.832507	1.43597	0.362395	1.7627	2.15204	6.93859	0.516803	5.88254	7.355	0.0802684	-0.0236087
	479	0.609905	0.386117	0.887878	1.19535	0.42893	0.747692	0.804531	0.865084	0.858559	1.22724	1.42348	1.30084	2.72658	13.88	1.55436	3.85306	12.5964	0.056341	-0.220577
	480	0.626812	0.346407	0.914701	1.37293	0.470068	0.849212	0.920243	0.923604	0.977089	1.02044	0.701483	1.63407	1.99278	13.9603	0.774021	4.59209	11.8199	0.0395677	0.364044
	481	0.600466	0.38698	0.863748	1.26717	0.46535	0.731547	0.715182	0.925134	1.2748	0.993663	-1.4782	2.25212	2.04937	18.8921	1.36535	2.37681	11.3415	0.0240349	0.756559
	482	0.606215	0.387239	0.887097	1.1789	0.424914	0.824353	0.886066	0.908759	0.931764	1.20913	-0.467849	1.71248	1.80745	11.9951	0.891123	14.2113	14.0834	0.0797231	0.304316
	483	0.604786	0.458252	0.87565	1.001	0.472717	0.772713	0.840335	0.879593	0.895142	1.3231	-0.645891	1.76043	2.56217	11.18	0.50936	4.51974	13.3279	0.0459271	-0.110081
	484	0.630934	0.453439	0.877278	1.08512	0.474241	0.828481	0.87286	0.927979	1.10477	1.15713	2.48191	1.93635	2.12131	15.284	1.06468	2.52134	10.3612	0.00252066	0.474541
	485	0.625497	0.340032	0.918119	1.39476	0.477486	0.791846	0.809597	0.891527	0.843517	1.07226	-1.32443	1.46096	1.42175	21.6338	0.601365	13.6684	2.37704	0.0815795	0.281135
	486	0.610822	0.382048	0.88722	1.21876	0.433174	0.759068	0.803105	0.871906	0.850468	1.18285	0.38504	1.1353	2.76961	15.4144	1.69025	12.9732	7.12369	0.0164725	0.0593996
	487	0.629155	0.364773	0.90633	1.31068	0.453906	0.842916	0.896465	0.930517	1.07676	1.07184	0.350017	1.93614	2.56135	7.39427	0.822985	1.79257	11.5182	0.00622533	0.542236
	488	0.620622	0.466461	0.865362	1.0506	0.486214	0.768184	0.885673	0.886563	1.01424	1.28387	2.99729	1.20588	2.74203	17.7256	0.757375	14.2157	4.25502	0.0417097	0.605077
	489	0.651886	0.404404	0.899021	1.27214	0.479924	0.734256	0.780043	0.90657	1.19913	1.06445	3.65598	1.58444	2.78729	10.525	0.873085	2.70276	10.8885	0.0217449	0.821564
	490	0.62639	0.40935	0.888827	1.17056	0.445548	0.7995	0.883573	0.909891	1.07373	1.16436	0.704533	1.92608	1.39063	20.4937	1.00618	3.48864	8.9977	0.0484826	0.677233
	491	0.600436	0.436361	0.861125	1.07409	0.458785	0.787321	0.891601	0.898693	1.03857	1.19046	2.69724	2.57168	1.75786	19.2469	0.792026	13.7513	4.81027	0.0257602	-0.217945
	492	0.612528	0.384075	0.890723	1.20433	0.429322	0.825273	0.909507	0.91696	1.03596	1.16823	2.63326	1.73308	1.53484	15.8857	1.60708	12.1814	1.19661	0.00731017	0.611122
	493	0.604237	0.425286	0.871798	1.0902	0.447076	0.763344	0.87226	0.892298	1.06869	1.22112	1.50744	1.27122	2.35625	21.1822	1.39303	9.88457	6.0934	0.0112215	0.686359
	494	0.637716	0.40139	0.897868	1.21428	0.450468	0.796779	0.824583	0.893589	0.860544	1.22634	-2.63709	1.95195	2.23335	9.06051	0.657819	1.61024	4.74349	0.0549637	-0.113376
	495	0.631314	0.359017	0.913234	1.31423	0.448102	0.818761	0.86922	0.905368	0.909732	1.11337	-0.579985	1.62836	1.41907	17.5619	0.983455	4.01896	4.83321	0.071447	0.399646
	496	0.607661	0.395494	0.880448	1.17541	0.433989	0.78925	0.840404	0.888924	0.885401	1.22662	1.42929	1.15566	2.48431	14.9699	1.52531	12.0457	6.6392	0.0292274	0.284691
	497	0.61246	0.399728	0.88735	1.15653	0.431551	0.808455	0.864128	0.899717	0.908324	1.23026	-0.0368381	1.43466	2.07442	12.3071	1.5238	6.4118	7.55505	0.0704911	0.321933
	498	0.617693	0.347388	0.907818	1.34096	0.451227	0.713178	0.84293	0.873737	1.09343	1.09238	0.869949	1.1435	1.79067	21.1041	1.26384	3.65634	3.95174	0.0163444	0.930397
	499	0.614812	0.388369	0.880356	1.24208	0.451205	0.850055	0.894449	0.934481	1.08275	1.05654	1.32144	1.85387	2.73649	11.0482	1.28825	13.0637	17.4977	0.041214	0.347135
	500	0.621085	0.403254	0.872117	1.25813	0.477391	0.822344	0.884627	0.921777	1.08481	1.03822	2.78998	2.24955	2.96337	15.7054	1.44294	19.5168	2.60992	0.0890235	-0.264432
	501	0.677629	0.456122	0.898577	1.17852	0.496367	0.786509	0.868681	0.888262	0.931012	1.13874	2.36838	1.50714	2.39079	19.9579	0.622963	12.7577	6.07687	0.0362531	0.0749684
	502	0.640432	0.38947	0.896656	1.31198	0.485479	0.814202	0.874486	0.90292	0.920444	1.07599	2.65799	1.25491	2.89218	18.5825	0.708286	1.07556	17.8377	0.0767334	0.184669
	503	0.664179	0.468873	0.889188	1.12043	0.494714	0.776424	0.866719	0.901922	1.09025	1.14403	0.801355	1.47341	2.48245	18.8644	0.961622	14.1917	2.3195	0.0391937	0.635532
	504	0.635261	0.425418	0.889146	1.1481	0.456012	0.798127	0.863293	0.894045	0.913615	1.17886	-0.888108	1.52445	2.25846	14.2933	1.05675	4.66188	13.1403	0.0390343	0.154508
	505	0.618541	0.379411	0.891931	1.24794	0.441451	0.855016	0.926781	0.929782	1.02075	1.0711	-1.70823	1.6258	2.82387	10.6222	1.11652	16.8143	17.4706	0.0113311	0.402198
	506	0.605314	0.40559	0.874941	1.14739	0.437898	0.729613	0.862328	0.874437	1.05646	1.22687	0.564013	1.00337	2.96534	17.2089	2.60571	19.4225	1.10895	0.0274315	0.812748
	507	0.602215	0.375699	0.891638	1.19315	0.416303	0.822511	0.881309	0.907636	0.925458	1.24559	2.31507	1.52663	1.92768	10.8726	2.02623	6.18019	4.92558	0.0952899	0.363347
	508	0.625478	0.383702	0.894026	1.25292	0.448072	0.77837	0.850557	0.88294	0.9071	1.11472	0.626124	1.4054	2.47257	19.194	1.38087	9.32942	12.652	0.0846332	-0.0648398
	509	0.615105	0.352519	0.906984	1.29467	0.431009	0.769664	0.886326	0.886597	1.00785	1.20325	0.667566	1.50656	1.23623	17.6211	0.492124	18.3257	12.1255	0.0338566	0.828267
	510	0.609042	0.422307	0.873616	1.11047	0.447232	0.827237	0.899279	0.911054	0.952743	1.19831	-2.09417	1.53593	2.72697	10.8926	1.85255	5.29028	5.178	0.0403418	0.379015
	511	0.685735	0.441755	0.903332	1.30959	0.545634	0.826541	0.830893	0.936201	1.15661	0.98395	2.96675	1.91866	2.81029	20.9661	0.4798	5.3411	4.9361	0.0699252	0.483576
	512	0.628406	0.445439	0.864983	1.14031	0.480748	0.830875	0.878891	0.927836	1.09726	1.09812	-3.53832	1.90079	2.58082	18.2358	0.996189	5.13149	12.3057	0.029896	0.551723
	513	0.651305	0.431456	0.883055	1.23031	0.493517	0.848136	0.891271	0.93408	1.08647	1.04277	-2.28572	2.43959	1.7698	17.1902	0.774195	3.33897	2.25636	0.0344457	0.437494
	514	0.62808	0.378191	0.894205	1.30828	0.470456	0.820337	0.811393	0.937944	1.17811	1.01987	0.793215	2.43253	2.48116	8.06523	0.793248	2.16154	9.69225	0.00806757	0.537955
	515	0.607259	0.352077	0.895142	1.3261	0.450026	0.798489	0.826965	0.894672	0.862715	1.12236	0.51314	0.963934	2.86766	15.4797	2.13207	7.38915	1.30051	0.020811	0.388703
	516	0.629299	0.389026	0.896156	1.23635	0.446247	0.740081	0.83307	0.892887	1.12803	1.10979	-1.82648	1.70878	1.49291	20.7982	1.1495	11.4482	4.92139	0.095404	0.906216
	517	0.610945	0.414944	0.86718	1.16388	0.454295	0.736894	0.775561	0.909113	1.20521	1.08168	-2.86813	1.83703	2.19344	21.1869	2.46859	6.23205	2.84064	0.0789501	0.858519
	518	0.615601	0.39386	0.883578	1.20461	0.441443	0.776313	0.88032	0.885549	0.965008	1.25418	0.20851	1.04267	2.52339	10.4017	1.26482	9.18192	2.17741	0.0262949	0.739983
	519	0.617443	0.346292	0.90999	1.32904	0.442357	0.723526	0.858056	0.872709	1.06281	1.26298	0.545995	1.48706	1.6084	8.39908	0.502685	7.01031	5.07148	0.0692025	1.00483
	520	0.611468	0.403102	0.896464	1.11771	0.424056	0.735631	0.803813	0.858062	0.864564	1.31042	-0.361862	2.06256	1.46485	17.7186	0.702642	9.39543	3.7207	0.0748136	-0.272181
	521	0.639471	0.439097	0.88495	1.13344	0.467487	0.709599	0.753108	0.903656	1.22732	1.15107	1.42364	1.94639	2.18206	10.2477	0.981767	8.61437	3.19513	0.021534	0.886101
	522	0.638039	0.412806	0.891619	1.19547	0.457008	0.819795	0.895232	0.907051	0.951661	1.16016	2.77382	1.34278	2.66066	13.3806	1.91336	3.00732	5.5267	0.0703602	0.317805
	523	0.608578	0.381619	0.876474	1.26645	0.45581	0.745615	0.789798	0.908956	1.18946	1.03644	-0.750883	1.68883	1.96015	21.6364	1.30102	2.68492	16.597	0.0749533	0.776639
	524	0.614129	0.349591	0.902191	1.34622	0.458153	0.808881	0.830203	0.928166	1.15385	0.997167	1.22483	1.82313	1.93001	17.2684	0.735462	19.0004	11.4605	0.00456395	0.655742
	525	0.60132	0.360747	0.889491	1.26428	0.428521	0.856426	0.928048	0.928352	0.993392	1.11052	-1.6345	1.81605	2.96454	7.10712	1.69069	5.21095	7.03086	0.0252662	0.366914
	526	0.621454	0.404603	0.883327	1.18796	0.44723	0.828518	0.908026	0.919356	1.04422	1.11812	3.31885	1.62494	2.20737	19.8209	1.50235	5.35366	16.0008	0.032506	0.343632
	527	0.631234	0.434676	0.887507	1.11028	0.457068	0.800033	0.851842	0.894856	0.895619	1.26125	-1.77156	1.92069	2.29138	9.61956	0.63219	8.38207	8.35862	0.0908629	0.00478619
	528	0.629408	0.411199	0.876648	1.23472	0.474284	0.838348	0.850491	0.937579	1.13585	1.0368	0.604323	2.01097	2.75362	11.5287	0.958574	11.6796	16.8008	0.0533134	0.415028
	529	0.614482	0.443264	0.865796	1.08993	0.467218	0.804162	0.842921	0.897516	0.880959	1.48923	3.68272	1.26815	2.59256	7.95337	0.394404	2.39205	8.43864	0.0493241	0.462924
	530	0.684025	0.513108	0.873043	1.14616	0.553254	0.781609	0.741038	0.938712	1.25161	1.03231	0.858079	2.40993	2.94141	18.647	0.541262	12.6232	3.55448	0.0725246	0.482132
	531	0.616494	0.372453	0.893359	1.26558	0.441512	0.791866	0.858831	0.89077	0.910571	1.1788	0.802493	0.989589	2.36474	19.7625	1.95651	9.32647	4.47552	0.0868037	0.526926
	532	0.640939	0.41634	0.888472	1.20854	0.466398	0.805399	0.884052	0.898971	0.943106	1.11084	-0.20473	1.42809	2.45709	20.4521	1.00553	7.43377	15.3146	0.0641571	0.167545
	533	0.679794	0.515034	0.884134	1.07185	0.534593	0.756311	0.785667	0.915148	1.19682	1.12461	0.676106	1.99268	2.64294	13.0053	0.563106	3.38857	6.29789	0.0413393	0.663112
	534	0.608077	0.393714	0.883864	1.17237	0.430455	0.820434	0.9111	0.912423	1.01528	1.26324	3.54454	1.42439	2.32192	9.53198	0.97202	8.47313	13.6163	0.0760093	0.608803
	535	0.609955	0.387747	0.885317	1.19819	0.432178	0.80316	0.821585	0.897732	0.853804	1.48847	3.52546	1.45769	2.61933	6.35724	0.601218	16.2282	7.42703	0.0382746	0.207141
	536	0.608348	0.376436	0.89461	1.20457	0.420451	0.748159	0.755674	0.868546	0.794051	1.33896	-1.9402	1.60846	1.32073	14.8995	0.698805	11.5873	3.8263	0.0853255	0.243162
	537	0.60436	0.348939	0.897855	1.30502	0.433951	0.706669	0.787331	0.890967	1.18259	1.04415	-1.17412	1.49831	1.85679	18.6369	1.65408	1.26548	13.2699	0.0121364	0.922547
	538	0.602665	0.472253	0.870207	0.976906	0.488984	0.744947	0.841153	0.865071	0.916176	1.28391	-0.169154	1.42976	2.59136	21.9682	1.20918	14.4826	2.43283	0.0588233	0.140148
	539	0.621161	0.364263	0.905638	1.27096	0.432693	0.763637	0.859606	0.897121	1.09553	1.1497	1.52047	1.69476	1.3635	16.5519	0.924061	12.7903	8.82511	0.075229	0.872059
	540	0.667215	0.504137	0.878362	1.07403	0.525022	0.794334	0.827796	0.921735	1.15339	1.11537	-0.413934	1.97926	2.76232	13.0143	0.791711	18.6827	2.14631	0.0761253	0.556147
	541	0.601857	0.418236	0.873846	1.09762	0.440532	0.748601	0.852573	0.868116	0.934112	1.2267	2.82525	1.43359	2.86772	21.6951	1.66907	19.4055	8.72187	0.0318411	-0.193035
	542	0.63103	0.372874	0.90359	1.29008	0.452417	0.854227	0.927627	0.928505	1.01124	1.10056	0.849525	2.20223	2.24106	7.90789	0.834906	11.1396	6.16167	0.0792868	0.258996
	543	0.648067	0.443402	0.884595	1.15426	0.477806	0.728051	0.843994	0.882248	1.10234	1.16525	0.554479	1.24155	2.62803	17.4516	0.920869	14.1212	7.04432	0.0687333	0.780218
	544	0.608857	0.38318	0.879384	1.23965	0.444586	0.850478	0.886411	0.936317	1.09406	1.08298	1.82317	2.07516	2.66635	8.47559	1.44135	19.0436	9.20906	0.0768459	0.385298
	545	0.610194	0.412849	0.86097	1.19789	0.464971	0.728538	0.721391	0.921922	1.26744	1.03525	1.50904	1.83485	2.98299	16.2533	2.59022	6.31953	7.94832	0.0506371	0.725567
	546	0.604068	0.343331	0.901248	1.31836	0.434219	0.739008	0.855014	0.88444	1.08756	1.14098	2.40092	1.12909	2.45751	10.0375	1.80385	12.528	4.0663	0.0649506	0.923425
	547	0.60119	0.41701	0.85074	1.17981	0.465895	0.808834	0.810824	0.932712	1.1768	1.04198	-1.38687	2.13936	2.27879	19.9497	1.54714	10.4015	10.7796	0.033587	0.490386
	548	0.620232	0.363811	0.897307	1.32586	0.463335	0.751088	0.780154	0.914336	1.20247	1.01144	2.52882	1.68628	1.92453	18.5742	1.60772	13.9351	1.55012	0.0015179	0.831448
	549	0.616177	0.418984	0.879369	1.12959	0.446617	0.809981	0.905839	0.906219	1.00845	1.17717	1.65188	2.2673	2.24445	12.5416	0.773079	11.9018	14.4929	0.0271889	-0.271933
	550	0.610907	0.417874	0.854853	1.21797	0.480106	0.80897	0.772623	0.942056	1.21987	1.02008	3.67706	2.46047	2.49891	20.4504	1.12729	3.40343	17.1045	0.0163874	0.291249
	551	0.627012	0.461141	0.872677	1.06481	0.480425	0.827575	0.908005	0.918892	1.04341	1.18497	-0.708439	1.89306	2.30541	12.3009	0.850267	2.61281	12.2557	0.0647434	0.41963
	552	0.634892	0.453171	0.874497	1.10785	0.47881	0.80321	0.895039	0.899392	0.970087	1.1326	-1.83116	1.79057	2.98602	14.0484	1.98614	6.49167	1.53849	0.0104663	-0.00479993
	553	0.609161	0.324811	0.916152	1.41231	0.471935	0.84046	0.891606	0.917251	0.929986	1.00055	1.34281	1.50952	2.19202	14.0979	0.920668	16.7286	3.02244	0.00272951	0.192736
	554	0.663194	0.434204	0.895934	1.20766	0.484082	0.800836	0.87448	0.895976	0.929756	1.1299	2.26012	1.31518	2.63014	21.2319	0.851954	17.6587	5.57276	0.0547613	0.214907
	555	0.639487	0.398584	0.894654	1.25241	0.464374	0.787044	0.821559	0.888019	0.861071	1.14152	-0.417092	1.07537	2.84831	16.8119	1.48289	14.105	1.84578	0.0512715	0.267982
	556	0.632869	0.356232	0.913223	1.35053	0.467048	0.787414	0.845918	0.887691	0.894512	1.05064	0.0355886	1.50383	2.52227	21.7688	1.01438	6.9228	5.97044	0.0784282	-0.295069
	557	0.612803	0.342022	0.909001	1.42397	0.505119	0.832671	0.881563	0.91302	0.919615	0.994404	-2.58446	1.28573	2.43267	18.9949	0.849235	2.71555	1.081	0.0861237	0.51095
	558	0.609554	0.368211	0.896981	1.23556	0.42289	0.75627	0.816973	0.906273	1.15721	1.19515	-0.171951	2.09215	1.8562	7.84868	1.47039	3.38768	1.59114	0.0701135	0.918012
	559	0.624314	0.405982	0.876158	1.23216	0.46744	0.827098	0.891423	0.923039	1.07659	1.05594	-0.489466	1.55033	2.73708	17.0325	1.03628	16.0722	17.4788	0.0845336	0.465873
	560	0.639916	0.426713	0.889881	1.15895	0.460309	0.774529	0.816892	0.880658	0.861126	1.27606	3.15554	1.40949	2.64161	9.58209	0.783373	14.2171	3.35207	0.0392371	0.0215399
	561	0.608425	0.389945	0.889879	1.16869	0.424167	0.81864	0.888933	0.906133	0.940629	1.28373	1.55806	1.44082	1.86131	11.5391	0.704939	15.6768	13.4351	0.0559058	0.513007
	562	0.616158	0.358248	0.907821	1.26697	0.423742	0.797374	0.831352	0.893747	0.869032	1.19101	-1.45092	1.76432	1.2535	18.33	0.820518	15.5261	6.90221	0.0685447	0.320434
	563	0.627721	0.467892	0.872341	1.0512	0.485976	0.818441	0.846674	0.928875	1.13583	1.19631	3.603	2.13288	2.37272	10.9034	0.873135	4.488	7.27147	0.0732857	0.522921
	564	0.615743	0.416459	0.873803	1.1544	0.451588	0.829199	0.91511	0.91669	1.0163	1.12826	-2.50116	1.45356	2.91738	16.2959	1.39592	4.62596	18.5079	0.0371698	0.482767
	565	0.61763	0.467047	0.85474	1.06876	0.491857	0.827338	0.834753	0.935714	1.15223	1.13372	3.04441	2.22687	2.90693	10.975	1.10376	13.8794	8.63561	0.0738782	0.343365
	566	0.60242	0.415413	0.874323	1.10676	0.439153	0.731311	0.859327	0.877508	1.06917	1.26159	0.105611	1.24398	1.99593	18.0151	0.730115	17.3244	11.6603	0.0127432	0.80051
	567	0.632008	0.427945	0.879039	1.16218	0.46492	0.784288	0.889351	0.890727	0.982604	1.15138	1.20952	1.94074	2.34201	20.9367	0.648783	18.7158	13.62	0.0914589	-0.409625
	568	0.606249	0.383549	0.879668	1.22216	0.437706	0.74841	0.87511	0.87511	1.00004	1.2435	1.34669	0.952911	2.13073	16.5241	1.51394	4.78627	2.97933	0.00522636	0.834493
	569	0.608516	0.413291	0.87419	1.13565	0.443225	0.782388	0.784489	0.887932	0.815919	1.37628	-0.833426	1.1612	2.92224	7.81338	1.11621	3.35941	4.01693	0.05044	0.301264
	570	0.607989	0.354736	0.902339	1.26942	0.421863	0.775576	0.812229	0.881436	0.854396	1.19325	1.2444	1.46578	2.62635	10.0019	1.16396	16.9863	5.77934	0.0279983	-0.306022
	571	0.663998	0.4942	0.882443	1.07439	0.513708	0.815071	0.905932	0.906813	0.987155	1.15068	-1.11693	1.97277	2.84292	11.6203	0.914751	3.55562	4.39159	0.062125	0.0720902
	572	0.613918	0.449677	0.874063	1.04983	0.466603	0.708718	0.815557	0.882189	1.14192	1.2476	2.07053	1.39602	2.2597	18.3669	0.641313	12.2866	11.4096	0.0139629	0.807038
	573	0.60907	0.327981	0.913691	1.38952	0.45923	0.764358	0.814746	0.910758	1.16234	0.998953	1.1386	1.6225	2.47342	9.44543	1.75488	14.6219	1.09752	0.091214	0.822362
	574	0.637245	0.428506	0.883537	1.16509	0.465408	0.840174	0.865709	0.935349	1.1177	1.12754	2.68553	2.15072	2.56967	8.85626	1.16669	12.7277	4.85402	0.0737311	0.459093
	575	0.611349	0.363969	0.890975	1.30092	0.45037	0.739359	0.753752	0.916894	1.2318	1.03181	0.832191	1.96948	2.86817	7.71995	1.62122	2.51126	8.04855	0.0334897	0.80257
	576	0.634791	0.439189	0.876391	1.14472	0.472471	0.763192	0.817148	0.874123	0.867374	1.27326	2.92136	1.11245	2.47926	19.3315	0.674818	13.2562	8.56436	0.0934961	0.250519
	577	0.627109	0.428506	0.892417	1.10166	0.448007	0.714714	0.774522	0.845844	0.835451	1.3371	0.103916	1.66254	1.52798	19.1499	0.635324	2.41832	5.54771	0.0714942	-0.0743048
	578	0.610294	0.355242	0.894162	1.34546	0.46599	0.850114	0.910407	0.931191	1.05738	0.991341	1.34751	1.62365	2.60133	17.092	1.96657	7.76843	2.6275	0.0421419	0.388171
	579	0.60409	0.338906	0.902363	1.34515	0.444678	0.793532	0.897349	0.90023	1.02415	1.06909	1.39826	1.1368	2.38836	19.6967	1.00989	17.9973	16.7083	0.0225435	0.664754
	580	0.618427	0.410581	0.87842	1.17048	0.449028	0.71256	0.755874	0.845187	0.811239	1.29013	2.13059	1.08576	2.42854	18.2156	0.938592	13.51	7.43782	0.0523528	-0.00745524
	581	0.604628	0.457857	0.868253	1.01671	0.474374	0.783793	0.892251	0.892251	0.999859	1.22123	-0.0554553	2.44494	1.97241	17.1414	0.643697	10.6538	4.94969	0.027437	-0.262224
	582	0.63422	0.403875	0.888023	1.23268	0.462703	0.819577	0.910463	0.910625	1.00538	1.09548	1.04655	2.13926	2.84048	12.871	1.23602	12.0778	1.01866	0.0425881	-0.507445
	583	0.600838	0.363003	0.899851	1.21226	0.407816	0.820219	0.911169	0.91135	1.00567	1.24985	-1.77996	2.23311	1.22665	12.8934	0.805417	12.5165	3.81205	0.0727868	0.777816
	584	0.600384	0.330369	0.9107	1.32211	0.419762	0.787007	0.811733	0.8885	0.848303	1.24659	1.91073	1.79329	1.05277	18.4779	0.587934	4.22814	8.01889	0.035816	0.329801
	585	0.607051	0.361401	0.893658	1.2711	0.431664	0.794086	0.873679	0.892432	0.933773	1.0976	0.948049	1.63267	2.18985	16.8233	1.64265	19.5718	6.32685	0.0309599	-0.133447
	586	0.610241	0.386828	0.894097	1.17397	0.421639	0.726584	0.783315	0.852862	0.840931	1.27639	0.911324	1.43056	1.88808	18.4055	0.953634	4.51821	9.66896	0.0157418	-0.257471
	587	0.606306	0.3583	0.898009	1.26267	0.423474	0.788272	0.816935	0.888901	0.854502	1.15884	-1.8818	1.42928	1.92992	13.2513	1.63228	10.8123	4.71101	0.0492447	0.184443
	588	0.606181	0.354427	0.902563	1.26165	0.417926	0.699777	0.829055	0.871897	1.11319	1.2584	2.30734	1.46611	1.36045	12.9059	0.627379	8.92965	7.27285	0.00981462	1.06227
	589	0.649131	0.416749	0.898319	1.20103	0.462014	0.789278	0.863326	0.889318	0.919818	1.15891	2.54523	1.56523	2.2454	16.077	0.907699	2.13813	9.67617	0.00493399	-0.0801358
	590	0.630496	0.481838	0.873795	1.02377	0.498005	0.736935	0.852339	0.884169	1.09158	1.2546	1.6462	1.39491	2.48629	18.1866	0.506104	4.00966	11.8562	0.017461	0.693571
	591	0.641333	0.465995	0.868802	1.11409	0.495093	0.804353	0.846716	0.897369	0.886145	1.2074	-3.32796	1.40006	2.72065	14.6109	0.61155	10.7227	2.91116	0.0173467	0.331816
	592	0.606431	0.385059	0.877463	1.22624	0.441475	0.74882	0.792927	0.909556	1.18628	1.07422	2.52662	1.4557	2.70239	17.6666	2.10357	18.4198	10.6174	0.0486278	0.76375
	593	0.626654	0.352777	0.910647	1.34911	0.462376	0.804761	0.863221	0.8975	0.909433	1.08776	1.32408	1.78423	2.34852	15.6975	0.545438	17.0121	3.95711	0.00170933	-0.636015
	594	0.616745	0.403116	0.887521	1.16004	0.436079	0.713364	0.774907	0.845014	0.836763	1.26019	0.0210881	1.29694	2.3887	19.4659	1.05125	10.26	9.60559	0.0579038	-0.294677
	595	0.608881	0.469144	0.876705	0.98642	0.483839	0.756522	0.823949	0.870232	0.881029	1.33837	0.0318904	1.63051	2.7457	10.8845	0.974217	9.88083	1.02631	0.0850794	-0.0450195
	596	0.645762	0.446003	0.875366	1.17478	0.489283	0.758012	0.733664	0.930839	1.2572	1.06999	3.66904	2.14597	2.54007	12.5421	0.789694	15.7156	11.6956	0.0536583	0.672096
	597	0.60905	0.346148	0.905525	1.3053	0.42957	0.805629	0.821546	0.89918	0.852755	1.37437	2.43867	1.68176	2.11291	6.50247	0.64616	16.2848	2.40478	0.0377082	0.167744
	598	0.601653	0.361511	0.893474	1.24439	0.419833	0.795979	0.801589	0.894829	0.831756	1.39863	2.13961	1.39263	2.24014	6.97213	1.0508	6.14046	2.3503	0.00739151	0.221407
	599	0.600798	0.396788	0.884899	1.13218	0.422813	0.737755	0.820572	0.859779	0.888052	1.25897	0.881423	1.53325	2.06335	20.9499	1.1127	4.88695	17.3319	0.0408731	-0.295355
	600	0.647576	0.473633	0.882423	1.07213	0.492028	0.715466	0.822657	0.883152	1.13341	1.17501	-0.955338	1.4599	2.45158	19.3888	1.22065	11.002	1.9369	0.0943234	0.767265
	601	0.606003	0.437142	0.865034	1.08024	0.459487	0.73757	0.794001	0.859297	0.84954	1.2822	-0.925641	1.18847	2.83978	15.8069	1.12167	11.5992	10.7635	0.0954822	0.0801639
	602	0.605614	0.326378	0.912732	1.37556	0.44764	0.794696	0.830005	0.892104	0.868636	1.0445	-1.50009	1.4457	2.04005	18.2269	0.838862	10.39	13.3543	0.0204232	0.0107719
	603	0.615984	0.422539	0.880949	1.11332	0.446424	0.69992	0.749678	0.900411	1.22966	1.20322	1.11041	1.93293	2.37892	8.46324	0.973295	17.4298	5.34611	0.0292382	0.913611
	604	0.653057	0.399332	0.906006	1.26016	0.466817	0.728391	0.764098	0.854735	0.81413	1.20183	-0.0912292	1.40582	2.09553	14.8731	0.675401	9.19396	2.11394	0.0901097	-0.304571
	605	0.62239	0.406743	0.872936	1.23682	0.471108	0.757052	0.790579	0.914074	1.19098	1.04817	-3.45948	1.81668	2.35203	18.3479	0.994409	2.79695	15.1445	0.0622091	0.823547
	606	0.60802	0.374085	0.884282	1.2572	0.44123	0.769545	0.885851	0.888914	1.02627	1.14672	0.391103	1.03563	2.69015	15.2816	0.963336	14.0586	11.9307	0.00567369	0.737217
	607	0.655811	0.461292	0.876912	1.15948	0.500378	0.829668	0.8731	0.928493	1.10483	1.0643	-1.51167	1.89948	2.75167	14.3589	1.2227	6.919	2.15465	0.0231306	0.462301
	608	0.601905	0.438293	0.85417	1.09323	0.465625	0.780984	0.887188	0.896483	1.04484	1.16782	2.81859	2.14234	2.76469	20.0224	1.47444	6.64124	5.76221	0.0715755	-0.495874
	609	0.611546	0.389901	0.876999	1.23314	0.449783	0.811671	0.904573	0.905212	0.988967	1.06675	0.432776	1.6397	2.79093	16.0915	2.19415	9.73269	12.3423	0.058497	0.0367008
	610	0.611668	0.42323	0.853278	1.20349	0.480647	0.766639	0.848727	0.877014	0.911921	1.23135	-3.61328	1.04763	2.28145	20.9788	0.623709	1.50696	10.8676	0.0558738	0.684547
	611	0.667466	0.424936	0.901133	1.24494	0.489191	0.809288	0.875865	0.900325	0.926011	1.0864	0.108499	1.62041	2.81815	13.5384	0.746155	3.14425	11.5695	0.0515231	-0.0876533
	612	0.614015	0.506719	0.850682	0.98086	0.530251	0.814844	0.859145	0.923993	1.11859	1.15062	0.225496	2.32081	2.90628	14.639	0.540164	12.0867	14.286	0.0264481	0.159913
	613	0.614311	0.441975	0.869217	1.08341	0.463968	0.836396	0.902049	0.925599	1.06371	1.16389	1.44291	1.8423	2.69295	11.0582	1.39748	6.00598	7.39947	0.0145233	0.370662
	614	0.623679	0.373948	0.901269	1.25621	0.43737	0.831279	0.909885	0.914062	0.972883	1.09536	-0.382947	1.94974	2.71745	11.1266	0.764044	18.7659	19.4482	0.0106065	-0.322799
	615	0.65756	0.452839	0.889099	1.1444	0.484022	0.795965	0.898859	0.898889	1.00245	1.16891	1.02422	1.31354	2.412	21.2094	0.890315	12.9562	4.91176	0.0497886	0.514526
	616	0.606775	0.411011	0.853865	1.23952	0.482135	0.707062	0.641298	0.938702	1.35343	0.992709	3.56969	2.44173	2.90127	21.0422	1.10592	10.9678	9.11681	0.00736067	0.61663
	617	0.65172	0.457118	0.885117	1.12304	0.483875	0.747119	0.847789	0.891736	1.10699	1.19228	3.71245	1.28103	2.75147	17.9814	1.53033	4.94533	1.83423	0.0890273	0.730897
	618	0.623407	0.416471	0.881931	1.1571	0.450558	0.708044	0.787064	0.89171	1.18334	1.12343	-2.08752	1.67133	1.94141	17.4144	1.72839	13.3512	1.03477	0.0333115	0.934705
	619	0.627149	0.453486	0.876862	1.07387	0.472688	0.777893	0.884298	0.886837	0.975896	1.19467	0.481338	2.05703	2.30926	17.8381	0.995679	14.3692	1.4737	0.032796	-0.347358
	620	0.612252	0.336772	0.909531	1.39273	0.473264	0.834219	0.91063	0.915404	0.971184	1.00774	-0.259051	2.21489	1.80906	13.5788	0.811492	7.88471	2.34342	0.063977	-0.108075
	621	0.643035	0.398913	0.89954	1.24311	0.459528	0.832103	0.907285	0.914123	0.965053	1.11023	0.380748	1.71796	1.88601	14.8641	0.594197	16.9973	15.6836	0.0599926	0.26956
	622	0.644916	0.386013	0.906251	1.28293	0.463213	0.830801	0.873809	0.929035	1.10435	1.10415	1.67343	2.21814	2.01385	8.22692	0.834707	2.2152	2.56692	0.0401887	0.623424
	623	0.60629	0.375885	0.895757	1.19507	0.41639	0.797813	0.852669	0.89363	0.898061	1.26242	0.373077	1.93716	2.82889	8.2172	0.982846	3.4387	8.26809	0.0353411	-0.561449
	624	0.634518	0.390062	0.896959	1.25465	0.455428	0.838199	0.915095	0.917973	0.978079	1.10227	3.50506	1.5836	2.52809	11.3809	1.69691	9.26717	2.5716	0.0390373	0.245622
	625	0.641709	0.405805	0.897776	1.21434	0.455321	0.809152	0.904657	0.907959	1.02488	1.17258	-0.0291568	1.43007	2.80237	8.11741	1.41671	1.82721	4.26391	0.0609883	0.65458
	626	0.641177	0.434605	0.880441	1.17265	0.475055	0.774371	0.851764	0.881198	0.911343	1.21152	-0.918423	1.01928	2.76514	19.5819	1.14011	3.80686	4.68817	0.0647559	0.508908
	627	0.615736	0.39828	0.877061	1.21477	0.451523	0.83406	0.906204	0.923191	1.05383	1.0569	-1.12157	1.59859	2.68271	21.0391	1.85873	4.53313	17.829	0.034168	0.353828
	628	0.614876	0.366533	0.893214	1.2921	0.448136	0.698191	0.820763	0.874316	1.12779	1.07072	-1.27112	1.08976	2.99248	18.3379	2.25421	17.0083	4.22532	0.0993046	0.901159
	629	0.60125	0.378475	0.880835	1.21596	0.429513	0.780326	0.807104	0.884762	0.84531	1.23122	0.0295097	0.988148	2.9473	12.6514	2.29798	6.03426	7.90634	0.0673898	0.31337
	630	0.60702	0.335919	0.911413	1.32196	0.42598	0.832159	0.891465	0.91295	0.935177	1.19274	3.55282	2.03624	2.0253	8.22752	0.503217	6.91297	19.5231	0.0466481	-0.0496881
	631	0.606623	0.371771	0.880378	1.2918	0.456663	0.765706	0.877495	0.880693	0.972192	1.16328	-2.77532	1.09875	2.17552	13.6079	0.683979	14.5104	10.8391	0.0606438	0.80835
	632	0.606536	0.377897	0.88184	1.24114	0.438841	0.802537	0.895872	0.90759	1.04799	1.11905	1.93004	1.26475	2.43278	19.3058	1.40681	14.1267	16.8795	0.0804509	0.587944
	633	0.612608	0.393923	0.887117	1.17873	0.431985	0.748664	0.81421	0.865647	0.871676	1.2194	1.92942	1.28832	2.34576	16.6805	1.81586	15.6586	4.38956	0.0311082	-0.0274717
	634	0.636653	0.414808	0.881447	1.23118	0.475642	0.816705	0.823711	0.933312	1.16319	1.04716	3.4736	1.87556	2.65014	12.6031	1.76377	5.81799	1.70499	0.0157373	0.5587
	635	0.610669	0.450904	0.871084	1.04412	0.468078	0.763068	0.878009	0.889423	1.05152	1.283	-1.15869	1.4586	2.45321	11.1233	0.719675	11.4626	9.36539	0.0956017	0.711132
	636	0.617749	0.353623	0.906102	1.30854	0.439832	0.798891	0.8486	0.894147	0.891755	1.09874	0.160028	1.58888	2.37607	11.3659	1.52079	11.046	4.4723	0.063054	-0.11728
	637	0.611133	0.443559	0.871203	1.06378	0.462441	0.800161	0.900733	0.900775	1.00289	1.16945	1.26552	1.72624	2.99294	14.3838	1.34395	13.4188	14.1231	0.0119709	0.0325634
	638	0.602048	0.410699	0.887238	1.0878	0.42829	0.737187	0.823217	0.859615	0.892556	1.29846	1.15089	1.75494	1.98325	18.7018	0.754855	4.23421	15.0364	0.0338731	-0.41819
	639	0.627786	0.344898	0.916771	1.37176	0.467061	0.799019	0.869462	0.894641	0.922932	1.06737	1.04339	1.86263	2.27068	21.4272	0.482011	15.1614	4.57518	0.0546514	-0.717537
	640	0.612867	0.361766	0.900319	1.26717	0.429012	0.837654	0.907314	0.916914	0.95892	1.20556	-0.851579	1.51836	2.73671	6.66783	1.19359	17.34	5.11347	0.078905	0.529465
	641	0.601483	0.363141	0.895618	1.22828	0.414696	0.803809	0.870011	0.89726	0.920366	1.19079	1.81488	1.75255	2.09733	10.811	1.13495	18.8878	14.931	0.0492946	-0.0673984
	642	0.627049	0.378555	0.897522	1.26997	0.44972	0.729197	0.768896	0.854952	0.820082	1.15249	-0.775184	1.13428	2.83222	18.6255	2.02361	12.9789	1.35715	0.0852396	-0.137647
	643	0.623496	0.423473	0.881253	1.13608	0.452491	0.802705	0.880327	0.897607	0.938053	1.50454	2.96328	1.33345	2.37494	7.17232	0.542126	5.27575	4.02975	0.0637365	0.661848
	644	0.645994	0.377597	0.909478	1.32687	0.478132	0.807064	0.836737	0.89916	0.871602	1.13535	3.54208	1.42206	2.41169	9.54348	0.715228	9.88036	3.57007	0.0749779	0.136874
	645	0.610729	0.384847	0.887147	1.20666	0.431694	0.819078	0.90489	0.907987	0.975928	1.17739	1.58952	2.49368	1.57079	11.8782	1.24256	12.5916	1.15052	0.0873401	0.0313301
	646	0.638404	0.425723	0.900595	1.12407	0.448168	0.822319	0.899896	0.908863	0.958589	1.32085	-1.31332	2.13632	1.5033	10.8548	0.408792	6.22433	4.1506	0.0906472	0.567846
	647	0.605884	0.47545	0.863942	0.991317	0.493478	0.76268	0.795326	0.915399	1.18637	1.20169	1.44962	2.22255	1.92409	16.2298	0.634027	17.7645	4.90254	0.0227558	0.673261
	648	0.684862	0.482775	0.887945	1.17088	0.524851	0.778216	0.815242	0.917264	1.1652	1.05167	-0.975392	1.74626	2.81843	19.9368	0.581719	3.60405	11.1685	0.0201894	0.616803
	649	0.618253	0.391275	0.888758	1.20671	0.438357	0.788016	0.894431	0.894474	0.996987	1.17937	-1.38364	1.2389	2.1704	13.5665	1.18618	11.5693	6.88903	0.0352429	0.698017
	650	0.623515	0.393369	0.885286	1.23949	0.454575	0.81164	0.902427	0.904466	0.980156	1.07653	1.30828	1.66227	2.84134	15.2177	1.55118	10.0804	13.3051	0.0507818	-0.0624069
	651	0.619987	0.368108	0.89994	1.27327	0.439108	0.826957	0.913995	0.914001	0.998968	1.121	2.61728	1.47495	1.82862	15.8864	1.64939	8.06728	5.20577	0.0786057	0.526321
	652	0.611539	0.389047	0.880062	1.22166	0.443453	0.839914	0.918628	0.922694	1.0254	1.07995	-2.58924	2.18956	2.1668	12.6856	0.924463	13.17	18.6411	0.0196217	0.192086
	653	0.606152	0.335667	0.905892	1.36171	0.450779	0.79323	0.840532	0.918074	1.13681	1.01771	-0.611811	1.83397	2.40091	8.28539	1.35435	2.98364	6.70004	0.0460546	0.738345
	654	0.612619	0.381084	0.894634	1.203	0.424895	0.759544	0.805596	0.872081	0.853612	1.23516	0.863749	1.43155	2.42076	11.7238	1.27424	5.62037	10.687	0.0508089	-0.209901
	655	0.600914	0.417691	0.853924	1.15994	0.459479	0.804242	0.898366	0.907196	1.04143	1.0954	0.224529	2.04194	2.83823	16.7915	2.63408	6.51417	7.01908	0.0957036	-0.232668
	656	0.650569	0.451072	0.885537	1.13573	0.480579	0.80754	0.90089	0.902617	0.981583	1.16071	2.61152	1.42563	2.59807	21.3012	1.04267	17.2917	7.35038	0.0867835	0.280289
	657	0.614339	0.415071	0.880964	1.13088	0.442468	0.82651	0.913087	0.913263	0.99447	1.16881	2.1962	1.69004	2.46283	12.2925	1.50986	6.29185	12.8898	0.0205649	0.220557
	658	0.628507	0.466192	0.877228	1.04545	0.482494	0.794806	0.892769	0.89569	0.975142	1.25428	2.09868	1.38036	2.60628	16.113	1.27873	6.97138	2.88831	0.0693734	0.405506
	659	0.6246	0.337251	0.921079	1.42897	0.501012	0.860149	0.921518	0.928693	0.967216	0.999735	3.37153	1.63475	2.4677	10.7767	0.462293	15.3986	9.79141	0.0819981	0.271257
	660	0.601098	0.35256	0.88791	1.34725	0.465182	0.843337	0.890298	0.931808	1.08593	1.00622	3.45462	1.6491	2.39737	19.2664	1.28024	7.12767	14.3265	0.0937672	0.416379
	661	0.655552	0.398836	0.906516	1.27513	0.473727	0.826259	0.904048	0.910984	0.964183	1.09144	3.38542	1.56964	2.02706	17.1973	1.20386	14.5032	1.61049	0.0977574	0.25778
	662	0.604363	0.382527	0.892402	1.1732	0.417164	0.703784	0.853053	0.860272	1.04549	1.31153	-1.05293	1.29706	1.37931	16.6758	1.33784	5.691	1.92308	0.0530109	0.998802
	663	0.609886	0.377065	0.887034	1.23799	0.435511	0.808872	0.844491	0.900051	0.880865	1.14944	-2.48687	1.30431	2.23991	15.2958	1.13115	11.5802	9.4317	0.0220718	0.331374
	664	0.607172	0.423437	0.868339	1.11549	0.45068	0.72945	0.850387	0.88054	1.09008	1.24652	0.65632	1.19374	2.90589	11.2141	0.86676	19.3377	12.5874	0.0422112	0.813288
	665	0.626903	0.427336	0.885041	1.12461	0.453008	0.755395	0.832172	0.869858	0.89403	1.2268	1.54746	1.42269	2.37308	17.1083	1.17919	6.72038	9.42617	0.0355832	-0.0369935
	666	0.668242	0.468183	0.895782	1.1148	0.491287	0.795903	0.885762	0.894754	0.955576	1.21233	2.39525	1.48351	2.00863	20.1903	0.985568	2.87955	1.73538	0.0933661	0.356484
	667	0.607909	0.448587	0.872567	1.03827	0.464881	0.763034	0.837633	0.874243	0.897296	1.25695	-1.30708	1.51789	2.50955	15.6882	0.810996	12.9092	13.3372	0.0334136	0.0420143
	668	0.607227	0.383827	0.873415	1.26446	0.458052	0.8282	0.912534	0.917253	1.02834	1.02394	-1.52573	1.86196	2.55608	18.6623	1.39529	18.2674	13.8053	0.0523363	0.105264

## Sheet: Missouri
COMPROMISE SOLUTIONS
		Metrics regarding Q					Metrics regarding TWSA				Parameter values (names and units based on Table 2; values of non-disturbed parameters are included in Table 2)
		NSE	KGE	CC	RBias	RVar	NSE	KGE	CC	RVar	EP-PTh	SN-MT	SL-MSM	SL-RC	SW-LD	SW-WD	SW-DC	NA-GM	NA-SM
EnCDA		0.6233	0.58157	0.83603	1.153	0.64673	0.65338	0.62875	0.82184	0.67429	1.61283	-1.53349	2.06263	1.15256	2.69995	15.0964	0.00297682	0.588372	-0.992896
POC		0.726205	0.748014	0.858926	1.06343	0.801073	0.712179	0.840089	0.873188	1.09742	1.04271	0.307889	2.98923	2.99989	16.6191	6.54332	0.0010004	0.735993	1.51843
GLUE		0.649098	0.608421	0.861303	1.17629	0.679035	0.714292	0.851888	0.86871	1.06856	1.0405	2.22686	2.54738	2.77616	7.54885	19.341	0.00447943	0.929841	1.65944
BEHAVIORAL SOLUTIONS (all behavioral solutions for each methodology)
		Metrics regarding Q					Metrics regarding TWSA				Parameter values (names and units based on Table 2; values of non-disturbed parameters are included in Table 2)
	Sl. No.	NSE	KGE	CC	RBias	RVar	NSE	KGE	CC	RVar	EP-PTh	SN-MT	SL-MSM	SL-RC	SW-LD	SW-WD	SW-DC	NA-GM	NA-SM
EnCDA	1	0.68857	0.6907	0.8616	1.1366	0.75945	0.58904	0.58845	0.77755	0.65374	1.60609	-1.3368	2.19452	1.04863	4.1411	18.9657	0.00628326	1.14278	-1.77157
	2	0.60792	0.67372	0.80862	1.1226	0.7659	0.59231	0.57295	0.78499	0.63102	1.60017	0.0540605	3	0.3	3.49644	17.1304	0.00388913	1.178	-1.00472
	3	0.6233	0.58157	0.83603	1.153	0.64673	0.65338	0.62875	0.82184	0.67429	1.61283	-1.53349	2.06263	1.15256	2.69995	15.0964	0.00297682	0.588372	-0.992896
POC	1	0.721239	0.735657	0.858402	1.07362	0.789271	0.715449	0.842219	0.874249	1.0953	1.04023	0.327224	2.9944	2.99962	16.5389	7.32438	0.00101184	0.740293	1.51857
	2	0.698174	0.701171	0.859592	1.11934	0.764753	0.725595	0.844966	0.87927	1.09726	1.02754	0.365501	2.9944	2.9749	16.62	8.38041	0.00100186	0.737487	1.52019
	3	0.760015	0.817514	0.872885	1.0234	0.871177	0.6542	0.8115	0.85096	1.11541	1.04913	0.983989	2.99457	2.99654	16.8158	2.32409	0.00100433	1.08725	1.61355
	4	0.745264	0.786077	0.865587	1.03725	0.837801	0.683435	0.824846	0.862528	1.10854	1.04194	0.734507	2.99446	2.99869	17.8394	3.56592	0.00100204	1.08203	1.64055
	5	0.726205	0.748014	0.858926	1.06343	0.801073	0.712179	0.840089	0.873188	1.09742	1.04271	0.307889	2.98923	2.99989	16.6191	6.54332	0.0010004	0.735993	1.51843
	6	0.740593	0.787943	0.862163	1.03074	0.84181	0.692258	0.821578	0.869393	1.12156	1.05412	0.954416	2.99421	2.99767	16.634	4.07946	0.00100124	0.751225	1.51315
	7	0.800383	0.738627	0.909046	1.08481	0.770109	0.562493	0.779623	0.807769	1.10777	1.1575	3.68479	2.95618	2.99031	17.7994	1.58356	0.0010115	0.827807	-0.518009
	8	0.630593	0.629453	0.861433	1.19748	0.718745	0.740209	0.846297	0.887352	1.10457	1.01997	1.30957	2.88602	2.99994	14.8978	10.7912	0.0010121	0.802968	1.17049
	9	0.711024	0.718743	0.858549	1.09541	0.776405	0.720288	0.837642	0.87912	1.10839	1.03933	1.09138	2.99875	2.99961	17.9153	8.01942	0.00100044	0.697741	1.50499
	10	0.731123	0.758528	0.8585	1.04481	0.809529	0.707291	0.835623	0.872201	1.10338	1.04938	0.753512	2.99859	2.9998	17.8657	6.1442	0.00100013	0.770999	1.53605
	11	0.663003	0.660169	0.861487	1.16641	0.738073	0.735092	0.84399	0.885262	1.10571	1.01994	0.365887	2.98907	2.9999	16.7243	9.45875	0.00100059	0.737566	1.24196
	12	0.766502	0.686598	0.897671	1.0995	0.720985	0.622442	0.804217	0.833761	1.10342	1.15283	3.58465	2.99969	2.99903	16.7588	3.62949	0.0010023	0.799982	-0.617268
	13	0.607264	0.609333	0.86363	1.2202	0.707534	0.745155	0.848299	0.889459	1.10389	1.00401	0.358512	2.98266	2.99985	16.7272	11.2815	0.00104718	0.814924	1.26764
	14	0.790143	0.712159	0.908745	1.09809	0.745238	0.583652	0.786973	0.818164	1.11098	1.15657	3.62269	2.99785	2.99926	16.6343	2.1573	0.0010004	0.83066	-0.645167
	15	0.750253	0.795147	0.868477	1.03692	0.847346	0.675809	0.82081	0.85977	1.11155	1.04292	0.710217	2.98559	2.99967	18.0092	3.02802	0.00100144	1.07526	1.61002
	16	0.795656	0.720598	0.906766	1.07424	0.747292	0.571393	0.786351	0.808158	1.09403	1.15666	3.68902	2.98278	2.99616	9.10115	2.36423	0.00100263	1.07861	-0.516231
	17	0.683923	0.678072	0.860079	1.13961	0.745897	0.730051	0.845326	0.881793	1.09976	1.0277	0.365887	2.98907	2.99816	14.694	9.46065	0.00100059	0.755581	1.24207
	18	0.80682	0.736042	0.916449	1.0993	0.770146	0.555214	0.776694	0.804548	1.108	1.14752	3.57379	2.99707	2.99995	18.8817	1.50794	0.00100096	0.957801	-0.506133
	19	0.775018	0.692702	0.902298	1.0996	0.726201	0.606031	0.798114	0.826112	1.10257	1.15845	3.70314	2.97646	2.99565	16.9845	3.1314	0.00103763	0.807166	-0.658541
	20	0.735464	0.77156	0.860827	1.0441	0.8243	0.7017	0.829081	0.871717	1.11295	1.04916	0.712879	2.99386	2.99974	17.9892	4.93221	0.00100017	0.744984	1.51684
	21	0.755142	0.803351	0.870888	1.03313	0.855421	0.666731	0.814724	0.857188	1.11803	1.04672	0.973372	2.99213	2.99869	17.8856	2.65143	0.00100137	1.08207	1.55554
	22	0.787181	0.709358	0.905972	1.09202	0.740838	0.588759	0.789705	0.819784	1.10838	1.15877	3.6229	2.99794	2.99998	16.8137	2.316	0.00100395	0.83066	-0.645167
	23	0.780354	0.699281	0.903587	1.09431	0.731222	0.600282	0.79536	0.82395	1.10433	1.15845	3.61569	2.99579	2.99882	17.0661	2.77169	0.00100726	0.829759	-0.658541
	24	0.770237	0.685367	0.899111	1.09329	0.716959	0.615003	0.803512	0.828573	1.09602	1.1588	3.62269	2.99794	2.99926	17.0742	3.60184	0.00100049	0.829713	-0.658426
GLUE	1	0.679523	0.653119	0.851706	1.12277	0.711447	0.550274	0.75924	0.764584	0.949555	1.13749	1.97305	1.94618	2.62493	7.41579	10.4554	0.0963794	0.974393	1.12278
	2	0.662429	0.606879	0.834006	1.01529	0.643971	0.553742	0.753277	0.763019	0.931354	1.19177	2.34875	1.96349	2.6877	18.7586	18.8355	0.020797	1.06889	0.971818
	3	0.674405	0.623238	0.860165	1.14346	0.680916	0.617396	0.811991	0.820068	1.05452	1.07607	-0.130314	2.86267	2.62818	7.05038	13.1023	0.0453795	1.32985	0.483408
	4	0.608807	0.581797	0.844512	1.18774	0.660192	0.56813	0.765685	0.772759	0.942859	1.14743	-0.545277	2.34294	2.31854	15.1889	11.6561	0.0675948	0.173173	0.131754
	5	0.687743	0.696511	0.835245	0.989372	0.745347	0.552018	0.759938	0.765411	0.94903	1.17772	1.67497	2.12203	2.7436	1.66479	13.694	0.0332214	0.184495	1.51821
	6	0.649734	0.670386	0.83237	0.922869	0.726876	0.568825	0.785211	0.785238	1.00342	1.23173	3.15953	2.472	2.56439	17.2533	14.3478	0.0312932	0.14218	0.924037
	7	0.678796	0.620419	0.841596	1.04341	0.657793	0.578692	0.740353	0.76903	0.881387	1.22616	1.69075	2.24446	1.50195	12.3859	7.04214	0.00552695	0.795113	1.67937
	8	0.722869	0.709918	0.858363	1.06062	0.754211	0.614105	0.806643	0.824892	1.082	1.10716	2.56459	2.55772	2.74184	11.6026	13.5832	0.0927842	0.799541	1.41385
	9	0.640536	0.563174	0.832688	1.09129	0.606947	0.561251	0.754707	0.766118	0.926056	1.25768	3.406	2.03044	2.18182	15.0317	16.3028	0.0344695	0.711148	0.432129
	10	0.655074	0.617612	0.851592	1.15166	0.681887	0.654785	0.815455	0.82065	0.956522	1.04738	-0.229797	2.01379	2.93466	12.6036	13.8854	0.00707969	1.28866	1.56016
	11	0.620999	0.492883	0.849575	1.09176	0.52448	0.553584	0.70443	0.749819	0.842613	1.48202	3.56221	2.67513	1.21848	11.7126	11.1149	0.0407481	0.84914	0.597993
	12	0.628009	0.538245	0.830275	1.08436	0.578937	0.557913	0.722047	0.75541	0.867962	1.33901	2.99972	2.78192	1.27887	8.98639	15.6388	0.0749103	0.392276	1.60208
	13	0.685301	0.619564	0.847307	1.05221	0.655484	0.585661	0.776505	0.782824	0.94723	1.16107	0.292288	2.29266	2.23479	18.0058	17.0269	0.0397756	0.840141	0.84827
	14	0.629141	0.586005	0.838296	0.940396	0.623581	0.573901	0.757329	0.771631	0.917923	1.30321	3.17776	2.65955	1.65027	4.64371	14.9788	0.00959732	0.676256	0.994306
	15	0.630922	0.652361	0.857819	1.19072	0.746498	0.573465	0.778231	0.780433	0.968828	1.08528	0.860772	2.13766	2.43855	2.66059	7.12476	0.0410658	0.372927	1.45544
	16	0.686438	0.656547	0.840747	1.00323	0.695717	0.586313	0.778613	0.783958	0.951648	1.1834	2.17605	2.2002	2.53667	3.65434	11.5696	0.00463592	0.859092	0.611896
	17	0.618322	0.553238	0.813079	1.06682	0.599759	0.558184	0.710012	0.753142	0.847836	1.35052	2.25472	1.72949	1.77047	4.63924	11.9671	0.00822528	0.393327	0.795726
	18	0.649098	0.608421	0.861303	1.17629	0.679035	0.714292	0.851888	0.86871	1.06856	1.0405	2.22686	2.54738	2.77616	7.54885	19.341	0.00447943	0.929841	1.65944
	19	0.609805	0.52009	0.81931	1.05889	0.559322	0.554849	0.663	0.745646	0.778928	1.46813	1.27259	1.78382	1.26253	1.39455	10.906	0.0258661	0.829575	1.45672
	20	0.689596	0.670482	0.841127	1.06541	0.71882	0.667117	0.824539	0.828188	0.964401	1.08018	-1.37848	2.35336	2.9537	2.24641	12.9601	0.00290817	0.623659	1.26876
	21	0.711103	0.69389	0.85048	1.01175	0.73315	0.594475	0.787187	0.790328	0.963571	1.13212	-0.0390337	2.36977	2.39206	15.8477	6.43876	0.00513908	1.01709	0.784877
	22	0.660245	0.590214	0.836599	1.02952	0.625363	0.550685	0.73503	0.755604	0.897631	1.24373	1.70976	2.18246	2.01742	17.346	11.542	0.0120653	0.833513	0.471297
	23	0.634887	0.63409	0.841001	1.15884	0.711245	0.59659	0.786914	0.790762	0.959688	1.13542	2.38337	1.78139	2.66217	6.79873	7.7714	0.0152487	0.427522	1.20161
	24	0.61188	0.523536	0.840126	1.14685	0.575863	0.569008	0.736718	0.763832	0.883629	1.26885	2.2773	1.99502	1.65372	10.9484	18.0409	0.06519	0.779483	0.989771
	25	0.694222	0.660732	0.880691	1.16796	0.73045	0.581422	0.793383	0.808848	1.07843	1.09755	2.40429	2.81124	2.45178	11.182	3.1912	0.00717293	1.07635	0.194133
	26	0.640516	0.541189	0.844984	1.10816	0.581934	0.575865	0.753649	0.771237	0.908588	1.19612	-0.696727	2.70788	1.81525	17.0584	16.2959	0.0235823	0.66673	0.084795
	27	0.616888	0.561176	0.830568	1.14301	0.621309	0.579821	0.764073	0.776089	0.925667	1.18575	1.07594	2.42729	2.18872	11.6888	16.593	0.0407013	-0.287072	0.570668
	28	0.67252	0.686825	0.854375	1.14148	0.761556	0.594958	0.801984	0.80821	1.04927	1.06521	-0.856656	2.77873	2.45152	12.178	8.4525	0.0708965	0.451523	1.40566
	29	0.685977	0.612934	0.850289	1.06094	0.6483	0.599536	0.797143	0.797496	0.988048	1.16518	1.88077	2.52206	2.42822	17.8737	13.4506	0.0172895	0.94076	0.261955
	30	0.635109	0.548307	0.84118	1.1216	0.595011	0.58572	0.760284	0.777138	0.911704	1.22741	3.28168	2.10338	1.67411	15.1641	15.9123	0.0222967	0.982654	1.3005
	31	0.64101	0.548881	0.848953	1.13081	0.595548	0.560009	0.763907	0.769541	0.948729	1.18735	0.274642	2.43909	2.63857	19.6495	16.5859	0.0817665	0.705085	-0.550744
	32	0.634722	0.682577	0.84052	0.881245	0.752572	0.562342	0.78004	0.7801	0.994873	1.16109	-1.17115	2.80002	2.89936	8.07072	12.1163	0.0275844	1.00434	0.733975
	33	0.667582	0.603198	0.844464	1.09964	0.648812	0.577722	0.778751	0.78171	0.963936	1.20293	2.46693	2.19602	2.15425	15.9619	15.7098	0.076515	0.496051	0.745067
	34	0.633547	0.580612	0.848418	1.1638	0.644926	0.624385	0.786182	0.800016	0.924341	1.15952	3.369	2.22212	1.57549	3.71145	12.299	0.00461483	0.687797	1.86728
	35	0.653735	0.648464	0.832829	0.944089	0.695853	0.552705	0.765494	0.768477	0.962715	1.24245	1.6825	2.23538	2.96957	2.70818	17.8404	0.071657	0.346817	0.255258
	36	0.6566	0.616302	0.844821	1.13335	0.675405	0.58543	0.79576	0.796507	1.01746	1.18554	2.98602	2.33663	2.92776	2.89461	11.3768	0.0337127	0.089216	-0.156175
	37	0.647999	0.588261	0.85643	1.16225	0.649871	0.639787	0.823107	0.825599	1.02959	1.12376	1.4396	2.42397	2.77696	11.8838	11.8992	0.01611	0.727777	-0.0320283
	38	0.670732	0.613506	0.841555	1.00074	0.647477	0.58174	0.78845	0.788726	0.989198	1.23451	2.83354	2.56143	2.15265	15.8336	19.286	0.063673	0.490207	0.586897
	39	0.664785	0.59597	0.858047	1.14248	0.649588	0.679954	0.841011	0.848721	1.04891	1.06713	0.962486	2.57139	2.8527	16.7947	18.0658	0.0104851	1.25912	0.818047
	40	0.645205	0.579855	0.834168	0.992613	0.614038	0.56538	0.717383	0.758064	0.85392	1.29476	2.34054	2.50112	1.47535	17.888	12.268	0.00239848	0.518099	1.30835
	41	0.621595	0.574681	0.811751	1.08404	0.627983	0.552984	0.731158	0.755471	0.888277	1.24214	2.18994	1.75855	2.70246	12.3909	19.6295	0.0384115	-0.102531	0.944648
	42	0.616265	0.600732	0.827295	1.15131	0.673362	0.588874	0.770129	0.78145	0.92875	1.10802	-1.6112	2.5181	2.57645	7.83244	13.3739	0.02958	-0.194164	1.19208
	43	0.608626	0.544322	0.836269	1.15964	0.605856	0.557664	0.727625	0.756589	0.877773	1.21255	0.992688	2.08483	1.72126	15.8307	18.1749	0.0808297	0.378256	1.23815
	44	0.638676	0.586013	0.825797	1.09791	0.637437	0.563961	0.762229	0.769985	0.939766	1.18652	-0.0885149	2.65318	2.57762	5.54005	16.4476	0.0650316	-0.585091	0.282802
	45	0.690935	0.687864	0.837669	1.04805	0.737763	0.560497	0.778153	0.778341	0.990879	1.18523	2.49011	2.15581	2.83594	16.2752	9.57372	0.0642237	0.132616	0.767928
	46	0.651009	0.597787	0.830897	1.09089	0.646563	0.559782	0.741939	0.76133	0.901857	1.19154	0.726557	1.83598	2.49322	8.33502	12.8362	0.0214054	0.762979	0.58314
	47	0.607099	0.570481	0.854187	1.20264	0.650482	0.596807	0.779689	0.787707	0.941104	1.08331	1.29199	1.85803	2.6756	17.3039	18.585	0.0811845	1.28562	1.4671
	48	0.613403	0.550873	0.845678	1.17423	0.615885	0.613146	0.774761	0.792329	0.912789	1.12483	-0.479678	2.35228	1.76111	13.6194	19.4784	0.0210363	0.472094	1.39194
	49	0.690149	0.684347	0.850644	0.948852	0.726663	0.609853	0.808773	0.811162	1.03013	1.14733	0.810809	2.80783	2.42502	3.26441	18.9436	0.0448036	0.762463	1.22246
	50	0.634261	0.562445	0.846178	1.14884	0.618375	0.574008	0.754323	0.770711	0.911774	1.18455	-0.83031	2.41292	2.32702	17.5071	7.52103	0.00619535	0.134379	-0.545926
	51	0.646709	0.574186	0.853714	1.15156	0.629935	0.594868	0.780366	0.787325	0.945152	1.1231	-0.767653	2.6068	1.83296	1.76362	17.1695	0.0449565	1.00385	0.802821
	52	0.724301	0.74773	0.869848	1.10518	0.811222	0.565001	0.786269	0.801301	1.07874	1.05434	1.06626	2.85019	2.74887	10.7821	3.50239	0.043297	1.25563	1.35867
	53	0.602746	0.644953	0.837385	1.18387	0.743474	0.585791	0.767194	0.779321	0.925842	1.05795	-1.83114	2.56785	2.17581	14.6586	3.47988	0.00389824	0.226834	1.781
	54	0.707683	0.668887	0.857223	1.08375	0.713231	0.559679	0.764758	0.769857	0.951288	1.11566	0.0305796	2.53328	1.90337	3.84238	10.7319	0.0575714	0.90386	1.70622
	55	0.706028	0.728707	0.857007	1.09941	0.791984	0.583331	0.79408	0.794494	1.01305	1.07685	-0.468389	2.40558	2.68325	18.4965	4.78189	0.0273706	0.529968	1.41662
	56	0.639248	0.58016	0.854295	1.16723	0.64353	0.570443	0.748594	0.767575	0.904171	1.13246	-0.345817	2.41873	1.59992	10.6903	8.29556	0.0173253	1.06754	1.0869
	57	0.638912	0.593895	0.836817	1.13538	0.65364	0.580989	0.767503	0.777717	0.931847	1.14208	-0.746307	2.6186	1.91327	12.1381	16.2037	0.0475273	0.116342	1.03539
	58	0.669172	0.675138	0.824403	1.05069	0.731426	0.553349	0.750348	0.761725	0.925492	1.12014	-2.17824	2.49134	2.57092	14.4309	5.64425	0.0194665	0.405969	1.381
	59	0.657289	0.570172	0.846424	1.10095	0.611443	0.609178	0.796916	0.799119	0.97017	1.18601	1.61588	2.75316	1.71467	12.8335	19.5021	0.0416899	0.568996	0.87772
	60	0.603411	0.595636	0.845217	1.19629	0.68216	0.553208	0.739491	0.757964	0.903649	1.13214	-0.132528	1.81291	2.27018	11.4837	6.14073	0.028447	0.635942	0.850983
	61	0.63742	0.603233	0.831318	1.12827	0.664563	0.579437	0.76427	0.776015	0.926519	1.14328	-1.03117	2.19678	2.61941	9.55731	17.27	0.064148	-0.0141669	0.751072
	62	0.697313	0.688165	0.846816	0.976173	0.72943	0.578871	0.780962	0.783206	0.968721	1.15638	0.482548	2.36479	2.46418	2.94068	13.2417	0.0255193	0.841908	1.04213
	63	0.729857	0.731302	0.859323	1.04736	0.776024	0.56532	0.787823	0.79092	1.03612	1.10693	1.27932	2.77693	2.23566	18.5495	4.84191	0.0356292	0.992756	1.22694
	64	0.602157	0.56428	0.860027	1.21504	0.647842	0.631095	0.819012	0.822043	1.03298	1.07834	-0.366158	2.57538	2.74287	17.5392	16.2928	0.0860745	1.07769	0.192573
	65	0.629555	0.626862	0.849341	1.17907	0.709369	0.591941	0.794142	0.794323	0.991371	1.12791	2.49834	1.96414	2.71616	13.5394	10.9949	0.0795753	0.367405	1.07892
	66	0.662006	0.609721	0.831953	1.06244	0.653331	0.563939	0.767961	0.772602	0.953824	1.23699	3.57833	1.9967	2.52274	8.38096	14.7886	0.0391693	0.665568	0.495187
	67	0.618747	0.546212	0.857096	1.18547	0.611283	0.649154	0.827076	0.828116	1.01894	1.09609	1.33471	2.80263	1.97794	10.0027	19.1825	0.0196965	1.17832	0.713425
	68	0.611631	0.629197	0.882007	1.24007	0.743214	0.551963	0.776862	0.776896	1.0039	1.07582	0.209467	2.39258	2.79233	2.80988	4.07765	0.0596278	0.932167	0.188674
	69	0.600551	0.498878	0.826342	1.02141	0.530418	0.553587	0.668044	0.745237	0.787183	1.41529	-0.267996	2.22073	1.32147	9.83583	19.9365	0.0286166	0.681408	1.12576
	70	0.674552	0.646502	0.832661	1.05444	0.693415	0.55704	0.756804	0.765524	0.935461	1.18726	0.699536	2.20205	2.4903	6.8503	14.5487	0.0556724	0.0299864	0.807448
	71	0.650892	0.566506	0.842085	1.09976	0.608812	0.558685	0.731257	0.757933	0.883267	1.15045	-1.10319	2.24415	1.98549	7.45112	17.9445	0.0182326	1.10816	0.903741
	72	0.612207	0.59797	0.838776	1.17704	0.677056	0.61736	0.81194	0.820267	1.05534	1.11697	2.25246	2.94649	2.04205	3.39082	19.6202	0.0932597	0.0831713	1.11457

## Sheet: UpperMRB
COMPROMISE SOLUTIONS
		Metrics regarding Q					Metrics regarding TWSA				Parameter values (names and units based on Table 2; values of non-disturbed parameters are included in Table 2)
		NSE	KGE	CC	RBias	RVar	NSE	KGE	CC	RVar	EP-PTh	SN-MT	SL-MSM	SL-RC	GW-MM	SW-LD	SW-WD	SW-DC
EnCDA		0.67973	0.69974	0.83143	1.0653	0.76026	0.59536	0.80143	0.80315	1.026	1.15104	-0.261938	1.74841	2.96651	0.31781	9.12143	14.4405	0.0782776
POC		0.670627	0.586752	0.885009	1.1999	0.657084	0.475925	0.683421	0.81869	1.25952	1.0013	-2.42402	2.96364	2.39931	0.907513	13.3188	1.88283	0.0010065
GLUE		0.610709	0.495593	0.884995	1.23021	0.566174	0.457239	0.677324	0.812333	1.26249	1.00606	-1.24907	2.23173	2.93588	0.656885	11.4925	6.37388	0.0140618
BEHAVIORAL SOLUTIONS (all behavioral solutions for each methodology)
		Metrics regarding Q					Metrics regarding TWSA				Parameter values (names and units based on Table 2; values of non-disturbed parameters are included in Table 2)
	Sl. No.	NSE	KGE	CC	RBias	RVar	NSE	KGE	CC	RVar	EP-PTh	SN-MT	SL-MSM	SL-RC	GW-MM	SW-LD	SW-WD	SW-DC
EnCDA	1	0.68955	0.75748	0.8308	1.0152	0.82693	0.52857	0.77131	0.7784	1.0565	1.20802	-1.7472	2.39175	2.96499	0.321835	16.5779	13.9231	0.0861357
	2	0.62629	0.74496	0.79521	1.02	0.8493	0.5447	0.77723	0.77906	1.0285	1.07461	-0.161834	1.31855	2.96553	0.317298	8.70742	16.2982	0.0820144
	3	0.60788	0.68394	0.83292	1.1715	0.79372	0.61095	0.80838	0.81857	1.0617	1.25235	-2.36746	2.53843	2.86781	0.334956	20	15.6949	0.0904001
	4	0.67709	0.73021	0.82324	1.0028	0.79619	0.50892	0.76234	0.76977	1.059	1.1249	-2.76791	2.44857	2.9648	0.323044	20	12.8088	0.0961546
	5	0.69676	0.74636	0.84719	1.0863	0.81687	0.52704	0.7565	0.75781	0.97484	1.35962	-0.419345	2.18474	2.94598	0.326638	14.521	18.1771	0.0793538
	6	0.65565	0.78261	0.81348	1.0034	0.8884	0.54751	0.77878	0.78085	1.0302	1.14623	-3.03682	2.23708	2.96096	0.323475	19.2856	14.6893	0.0958286
	7	0.64557	0.69346	0.85102	1.168	0.79128	0.48145	0.74925	0.7655	1.0888	1.1303	-3.75	2.48547	2.92536	0.349666	20	14.0884	0.1
	8	0.62013	0.67354	0.82463	1.1477	0.76761	0.63651	0.81489	0.8361	1.086	1.18714	-2.94024	2.25827	2.90706	0.383617	20	15.3965	0.0967931
	9	0.63865	0.66465	0.84282	1.1647	0.75375	0.54774	0.77292	0.77296	0.99569	1.02466	-2.03855	1.37875	2.96718	0.318882	14.5642	13.8991	0.090168
	10	0.69336	0.701	0.83999	1.0651	0.75596	0.44044	0.73174	0.74417	1.0807	1.21323	-0.35427	1.93369	2.96008	0.321277	12.2691	16.1805	0.0805157
	11	0.66444	0.70454	0.82042	1.0576	0.77258	0.55394	0.7764	0.77641	0.99743	1.05431	-3.75	1.93123	2.9551	0.351989	20	14.8815	0.099811
	12	0.66354	0.70632	0.81725	1.0402	0.77365	0.5862	0.79783	0.8018	1.0399	1.27892	0.420084	1.90204	2.95843	0.321021	10.4074	16.845	0.0690856
	13	0.66884	0.70385	0.81925	1.014	0.76583	0.58126	0.78588	0.81726	1.1116	0.995306	-2.85328	1.54763	2.96729	0.320116	18.2661	13.1338	0.0947781
	14	0.67826	0.69395	0.82753	1.0413	0.75057	0.50327	0.74695	0.74752	0.98308	1.06247	-1.09639	1.31097	2.96414	0.317216	11.461	15.8222	0.0875094
	15	0.67458	0.68718	0.82768	1.059	0.74566	0.58535	0.79185	0.79189	0.9961	1.00847	-1.78058	1.12068	2.97318	0.315639	9.43117	13.7616	0.0873728
	16	0.67973	0.69974	0.83143	1.0653	0.76026	0.59536	0.80143	0.80315	1.026	1.15104	-0.261938	1.74841	2.96651	0.31781	9.12143	14.4405	0.0782776
	17	0.63986	0.68114	0.82492	1.1233	0.76377	0.38701	0.67646	0.67978	0.95377	1.02331	-2.08111	1.40746	2.96854	0.318415	14.7432	13.7561	0.0889653
	18	0.69781	0.74152	0.83896	0.97109	0.7999	0.56928	0.73667	0.84	1.2091	1.23203	-1.69725	2.33008	2.96552	0.320067	14.282	13.5722	0.0748985
	19	0.69906	0.70982	0.8554	1.112	0.77473	0.48561	0.74862	0.77381	1.1097	1.14835	-0.505997	1.73552	2.96546	0.318189	9.35321	13.9986	0.078354
POC	1	0.79	0.716277	0.907599	1.10375	0.752622	0.355609	0.602235	0.805484	1.34696	1.04493	-0.723011	2.94849	2.65974	0.891131	14.9364	1.36339	0.00100467
	2	0.712149	0.618814	0.89231	1.16861	0.675539	0.445706	0.662258	0.815051	1.2826	1.01604	-2.11001	2.92277	2.35697	0.907721	12.1257	1.85491	0.001
	3	0.670627	0.586752	0.885009	1.1999	0.657084	0.475925	0.683421	0.81869	1.25952	1.0013	-2.42402	2.96364	2.39931	0.907513	13.3188	1.88283	0.0010065
	4	0.770695	0.679659	0.904605	1.12121	0.71924	0.385951	0.618899	0.810304	1.33054	1.03737	-1.30747	2.91012	2.51273	0.936948	10.9449	1.71286	0.001
	5	0.722663	0.628059	0.895844	1.16425	0.682961	0.436852	0.652991	0.81584	1.29411	1.0174	-1.92608	2.96076	2.46165	0.92031	12.3256	1.78291	0.00101416
	6	0.631142	0.557325	0.875365	1.22033	0.636843	0.50004	0.69967	0.822358	1.24216	0.992069	-2.78598	2.99015	2.37121	0.926817	12.2778	2.06306	0.00100049
	7	0.662622	0.577719	0.882031	1.20116	0.647951	0.481041	0.685382	0.820273	1.25823	1.00091	-2.53616	2.98025	2.4002	0.920723	11.9311	2.04585	0.00101973
	8	0.752988	0.6643	0.899835	1.13639	0.710069	0.407044	0.638583	0.809197	1.30695	1.03068	-1.65444	2.93746	2.44007	0.80835	12.893	1.75399	0.00101025
	9	0.621275	0.548903	0.87529	1.22853	0.631609	0.505314	0.706635	0.821297	1.23266	0.988924	-2.78279	2.94489	2.29052	0.931963	12.7975	2.09203	0.00101827
	10	0.76141	0.66874	0.903419	1.13247	0.712153	0.397503	0.628284	0.810483	1.31977	1.03235	-1.42413	2.90801	2.45315	0.921673	11.7202	1.68357	0.00100895
	11	0.602468	0.53664	0.870103	1.23667	0.623416	0.515392	0.712589	0.823455	1.2268	0.985137	-2.96138	2.98427	2.28429	0.933298	12.4603	2.18328	0.00100156
	12	0.647882	0.565821	0.881448	1.21413	0.641384	0.490298	0.694315	0.820153	1.24718	0.995505	-2.59119	2.97844	2.22129	0.916413	13.4408	1.96185	0.00100715
	13	0.700431	0.613624	0.889445	1.17797	0.675359	0.455019	0.669695	0.815591	1.27403	1.01135	-2.25084	2.96116	2.37729	0.846213	12.9325	1.79852	0.00100814
	14	0.717298	0.624866	0.894212	1.16762	0.681504	0.44135	0.660562	0.813794	1.2838	1.01641	-1.97679	2.88641	2.42732	0.918647	12.4878	1.82064	0.00100684
	15	0.612241	0.539634	0.877558	1.23884	0.625967	0.510186	0.708939	0.822655	1.23079	0.984211	-2.70854	2.97311	2.29169	0.935323	11.8581	2.24396	0.00101148
	16	0.737949	0.644408	0.898574	1.15231	0.695104	0.422604	0.644462	0.813567	1.30274	1.02288	-1.75125	2.94089	2.48257	0.911717	12.5603	1.73756	0.00100004
	17	0.745112	0.646797	0.901097	1.14715	0.694522	0.415049	0.638566	0.813194	1.30942	1.02568	-1.61451	2.97537	2.3991	0.917619	13.4799	1.70741	0.00102419
	18	0.780326	0.698793	0.905891	1.11301	0.737134	0.372101	0.610942	0.808261	1.33853	1.04062	-1.12052	2.93184	2.561	0.91423	12.6248	1.45961	0.001
	19	0.765565	0.675032	0.90254	1.12321	0.715528	0.392501	0.624154	0.810434	1.32454	1.03639	-1.44371	2.92802	2.54872	0.909869	12.3384	1.71523	0.001
	20	0.732353	0.638321	0.896454	1.1537	0.689408	0.42773	0.647429	0.814431	1.29978	1.02228	-1.84178	2.93034	2.52449	0.941427	12.889	1.73079	0.00101893
	21	0.678177	0.58633	0.88941	1.19845	0.654295	0.470764	0.679109	0.818423	1.26458	1.00256	-2.26659	2.96603	2.26591	0.925188	12.9405	1.94837	0.0010035
	22	0.65555	0.569321	0.883636	1.20997	0.642431	0.485395	0.688915	0.820585	1.25413	0.99719	-2.48566	2.98088	2.31596	0.938525	12.6103	2.05867	0.00101159
	23	0.727255	0.6293	0.896609	1.15884	0.68141	0.432489	0.649213	0.815795	1.29853	1.02008	-1.87414	2.9813	2.46042	0.936366	13.3279	1.8198	0.00100003
	24	0.757459	0.662315	0.903798	1.13878	0.707567	0.402139	0.629801	0.811879	1.31884	1.02928	-1.42413	2.93989	2.45315	0.921673	11.7264	1.73682	0.00100035
	25	0.692633	0.600356	0.890538	1.18643	0.66388	0.460844	0.670998	0.817859	1.27398	1.00758	-2.19821	2.96489	2.38716	0.923448	12.819	1.90235	0.001
	26	0.706331	0.613183	0.891149	1.17263	0.671402	0.450432	0.662539	0.817303	1.28373	1.01374	-2.17433	2.98089	2.40163	0.913377	12.7256	1.83385	0.001
	27	0.776583	0.689694	0.90568	1.11658	0.728333	0.377627	0.617122	0.807299	1.33085	1.0398	-1.19651	2.93476	2.40306	0.908568	13.994	1.4343	0.00100052
	28	0.786692	0.703963	0.906781	1.10188	0.738146	0.362355	0.603747	0.807815	1.34653	1.04629	-1.08315	2.95646	2.47549	0.882703	11.4883	1.55586	0.00103331
	29	0.638078	0.559277	0.881949	1.22419	0.639389	0.496039	0.697453	0.821457	1.24425	0.990581	-2.58045	2.99199	2.24671	0.92624	13.4488	1.94551	0.0010014
	30	0.686533	0.596246	0.887888	1.1878	0.660618	0.465314	0.673075	0.818993	1.27224	1.00683	-2.33139	2.99311	2.37133	0.907554	12.1543	1.92954	0.00100075
GLUE	1	0.665255	0.533763	0.882922	1.16724	0.580832	0.365796	0.587372	0.81879	1.37071	1.04445	1.81368	2.50862	2.9389	0.747087	11.8155	11.6473	0.028168
	2	0.649575	0.539421	0.880423	1.19607	0.600763	0.365207	0.677289	0.75666	1.21196	1.05485	-1.14868	1.79645	1.80287	0.874307	14.829	3.64282	0.0635627
	3	0.653703	0.576353	0.887493	1.22136	0.656752	0.374429	0.67101	0.768717	1.23397	1.02765	1.37288	1.62709	2.53954	1.59302	8.2724	1.48772	0.0786633
	4	0.653819	0.55265	0.883882	1.205	0.619719	0.374213	0.633639	0.795481	1.30396	1.03397	2.44769	1.75634	2.97032	1.70373	12.7118	3.20194	0.0629902
	5	0.615095	0.509644	0.845866	1.15295	0.560343	0.407698	0.672715	0.787767	1.24914	1.06338	-3.1514	1.86678	2.55814	1.19648	11.0347	5.5602	0.0459473
	6	0.619325	0.521807	0.863116	1.19594	0.585828	0.384921	0.696117	0.751027	1.17423	1.05552	0.958046	1.36579	2.80744	1.0063	19.9544	3.76571	0.017679
	7	0.648082	0.559527	0.867375	1.18358	0.622211	0.384204	0.69727	0.748856	1.16903	1.04781	-1.69947	1.8308	1.6661	1.03169	15.3744	1.00278	0.00802336
	8	0.641695	0.562986	0.835979	1.11249	0.610866	0.35422	0.673763	0.752229	1.21223	1.08902	-2.53191	1.60974	2.41783	1.56745	10.9472	1.89494	0.0169132
	9	0.630185	0.505199	0.849402	1.09901	0.53919	0.362795	0.655624	0.773865	1.25973	1.09846	-2.35282	1.82545	2.65899	1.30231	6.59802	10.6749	0.0255866
	10	0.617333	0.530769	0.891245	1.25143	0.619033	0.406882	0.659182	0.796447	1.27336	1.01437	1.90724	1.97186	2.65163	0.554366	5.96831	9.72784	0.0924
	11	0.620118	0.519066	0.86456	1.1956	0.582037	0.403872	0.695407	0.766846	1.196	1.05144	-1.75963	1.59205	2.61286	0.922884	14.5659	5.57585	0.066675
	12	0.615781	0.485655	0.876258	1.19623	0.540944	0.406024	0.681263	0.780439	1.23105	1.04968	-1.49815	1.91871	2.18285	0.652361	10.123	12.4675	0.0478809
	13	0.624243	0.530115	0.8509	1.16727	0.586986	0.360365	0.686671	0.74178	1.17748	1.07696	-2.24893	1.58092	1.92715	1.4798	6.46368	2.84777	0.033575
	14	0.66186	0.531848	0.868489	1.12321	0.567924	0.354363	0.660033	0.765123	1.24578	1.08975	-2.66989	2.10803	1.91679	0.461468	15.0538	8.86525	0.0372219
	15	0.60904	0.477101	0.872845	1.19144	0.530315	0.390965	0.675638	0.77544	1.23406	1.05825	0.841932	1.56061	2.9768	1.65407	5.67606	12.2649	0.0347283
	16	0.612043	0.492881	0.842591	1.12188	0.533592	0.393722	0.634523	0.804916	1.30906	1.07115	-3.1543	2.08434	2.79593	2.21658	1.43188	8.5924	0.0288566
	17	0.623353	0.539565	0.881453	1.23286	0.62089	0.390953	0.681439	0.770627	1.22106	1.03405	2.82909	1.43763	2.98735	1.71042	2.82694	4.25671	0.0500433
	18	0.610647	0.506851	0.87488	1.22047	0.576994	0.38578	0.69379	0.754628	1.18319	1.04426	1.72355	1.38224	2.60994	1.6923	1.55902	5.90945	0.012435
	19	0.625019	0.49459	0.853821	1.11906	0.531069	0.380838	0.602667	0.817144	1.35276	1.07211	-2.54014	2.28372	2.89988	1.27166	10.7711	10.7464	0.0609276
	20	0.611486	0.474939	0.875532	1.18964	0.526466	0.382497	0.595022	0.82215	1.36384	1.0378	1.18047	2.56465	2.76164	1.02363	4.91201	19.2277	0.0306947
	21	0.640882	0.52566	0.877042	1.19256	0.584307	0.363972	0.670562	0.762202	1.22799	1.06407	0.623412	1.60261	2.3209	1.27832	2.85565	7.60124	0.0891524
	22	0.641719	0.514937	0.871897	1.1675	0.563172	0.36142	0.624392	0.794767	1.31458	1.05357	-0.352391	1.95399	2.26191	1.97068	10.4344	4.6616	0.040293
	23	0.635873	0.566765	0.856502	1.18291	0.634427	0.357575	0.689858	0.733874	1.15926	1.06428	-0.786197	1.30352	2.8585	1.71848	18.5265	1.4458	0.0786951
	24	0.62818	0.617258	0.883953	1.24309	0.728099	0.386677	0.684247	0.765206	1.21112	1.00535	2.02882	1.70481	2.81418	0.767371	6.05844	1.22948	0.0360379
	25	0.640498	0.503571	0.879707	1.17597	0.551664	0.357654	0.650377	0.774829	1.26746	1.05712	1.57776	2.106	1.75669	0.976001	9.888	9.58488	0.00741195
	26	0.652367	0.553148	0.871106	1.1808	0.612221	0.405199	0.668893	0.789002	1.25517	1.04111	-2.20971	1.93856	2.5179	0.913978	15.7396	3.11176	0.0675928
	27	0.651928	0.523719	0.874653	1.16245	0.570184	0.35863	0.608157	0.803405	1.33896	1.05356	1.94803	2.07967	2.48606	1.21997	17.2558	6.74518	0.0246392
	28	0.645328	0.510993	0.872263	1.15355	0.553644	0.361829	0.650202	0.777394	1.26982	1.06796	-0.403076	1.75179	2.3228	1.51509	16.7394	4.87127	0.0237311
	29	0.627545	0.498264	0.872306	1.17882	0.54894	0.36211	0.627412	0.793179	1.30991	1.05941	0.828042	2.11351	2.27281	0.733204	1.0789	19.9895	0.0825814
	30	0.617256	0.526708	0.870831	1.21635	0.599357	0.383946	0.699538	0.745261	1.15933	1.04529	-2.54505	1.75037	1.81591	0.432905	15.8534	4.49638	0.0439105
	31	0.61149	0.502791	0.876169	1.21876	0.571016	0.379487	0.644092	0.791497	1.28844	1.03629	0.783005	2.01639	1.87143	1.67106	2.56608	6.0526	0.0770952
	32	0.675819	0.562173	0.89173	1.19419	0.622826	0.384086	0.604841	0.817447	1.35046	1.02167	0.553854	2.36973	2.8001	1.31201	1.91931	3.76205	0.0311016
	33	0.616597	0.529237	0.874078	1.22408	0.605602	0.430736	0.680067	0.796031	1.24648	1.01531	-1.69573	1.87228	2.65457	1.3421	13.8349	2.13571	0.0687218
	34	0.669631	0.524018	0.885044	1.14726	0.562211	0.384821	0.62267	0.807546	1.32456	1.05255	-0.524503	2.35573	2.8216	0.652872	13.4385	11.7171	0.0175723
	35	0.622493	0.584888	0.888274	1.25345	0.690809	0.37962	0.676747	0.767171	1.22424	1.01501	2.87572	1.60519	2.6157	0.958274	7.04398	2.38877	0.0811513
	36	0.686131	0.58064	0.892555	1.191	0.642456	0.369419	0.642558	0.787056	1.28709	1.04149	1.04036	1.95759	2.71582	0.537871	12.9396	6.71807	0.0754642
	37	0.647957	0.555832	0.89385	1.23181	0.636297	0.391435	0.648839	0.794803	1.28497	1.01916	1.38313	2.023	2.42711	0.69631	15.468	4.84632	0.0907348
	38	0.612986	0.494611	0.873262	1.20425	0.555434	0.381647	0.663724	0.77896	1.25342	1.04742	3.73376	1.59565	2.60206	1.68607	17.7941	6.28356	0.0112316
	39	0.628098	0.526055	0.878749	1.21568	0.595765	0.427808	0.657847	0.808412	1.28348	1.01073	-1.2873	2.02068	2.70022	1.88685	7.23477	1.78971	0.0252452
	40	0.627412	0.512846	0.877771	1.20563	0.575623	0.366248	0.598696	0.812596	1.35486	1.03215	3.43039	2.54383	2.99881	0.508882	16.0034	19.7829	0.0203981
	41	0.62965	0.500501	0.856426	1.12698	0.538737	0.401383	0.640797	0.80502	1.30168	1.06293	-2.55877	2.14515	2.64842	1.40751	6.84892	6.94723	0.0127436
	42	0.617933	0.521241	0.876767	1.22287	0.594598	0.393417	0.668876	0.78215	1.24937	1.02739	-1.0977	2.21715	1.50893	1.24901	13.5202	1.7651	0.0809463
	43	0.618694	0.51482	0.869274	1.20401	0.579653	0.359531	0.676491	0.753301	1.20928	1.05572	3.45095	1.57992	2.46674	0.804727	9.16416	12.936	0.0098017
	44	0.61518	0.507495	0.87611	1.21676	0.575469	0.357209	0.680853	0.746621	1.19405	1.06187	0.93408	1.39294	2.24394	2.06242	3.35768	5.26749	0.0796481
	45	0.673453	0.565711	0.876342	1.16424	0.617454	0.371605	0.646502	0.785572	1.28104	1.04867	-1.23313	1.88138	2.37742	1.79491	6.83457	1.99962	0.0457288
	46	0.606287	0.466515	0.855142	1.1264	0.50236	0.355559	0.642743	0.779249	1.28089	1.09153	-1.87898	2.01845	2.07097	1.48683	5.68922	14.693	0.0367792
	47	0.642706	0.53751	0.859264	1.1571	0.588407	0.40422	0.67898	0.781082	1.2348	1.05311	-2.88314	2.13027	1.8935	0.930489	5.49226	3.07268	0.0130925
	48	0.621381	0.513327	0.871995	1.20406	0.577122	0.368846	0.649947	0.781595	1.27356	1.05638	3.17959	1.65982	2.59101	1.2559	8.31349	10.3298	0.0802433
	49	0.645929	0.569513	0.841584	1.12798	0.620733	0.386071	0.613739	0.813355	1.33817	1.04768	-3.24761	2.44617	2.58076	1.94545	5.30419	1.18601	0.0293976
	50	0.649618	0.54057	0.877027	1.18957	0.59998	0.381976	0.66956	0.774658	1.24169	1.04353	2.08811	1.79254	2.52496	0.860335	8.18764	7.53153	0.00781911
	51	0.622427	0.515459	0.854971	1.16689	0.568848	0.401877	0.64577	0.802259	1.2939	1.05393	-3.53871	2.88571	1.52038	0.70749	14.8842	3.42372	0.0901019
	52	0.639852	0.522309	0.865616	1.16393	0.571914	0.361234	0.678628	0.752311	1.20477	1.0788	-1.41277	1.57448	2.3288	1.00649	16.37	6.25153	0.0603912
	53	0.65996	0.527963	0.888645	1.18663	0.580967	0.387941	0.61388	0.814149	1.33845	1.03701	1.54561	2.3537	2.97172	0.871255	1.16078	13.884	0.0299414
	54	0.658255	0.546696	0.884569	1.19615	0.607975	0.364786	0.656615	0.774294	1.25879	1.05077	1.97648	1.81166	2.20594	0.98385	3.66654	7.49598	0.0414309
	55	0.622804	0.519969	0.878144	1.21809	0.5901	0.362581	0.651709	0.77671	1.2673	1.04164	3.41497	2.27135	1.53976	0.579504	7.4078	10.5906	0.017649
	56	0.658875	0.572799	0.898099	1.23255	0.656435	0.381197	0.653958	0.785744	1.27173	1.01962	1.00637	2.03739	2.3436	0.445084	15.1215	5.37137	0.0981541
	57	0.657952	0.532886	0.881409	1.17788	0.584682	0.375958	0.612669	0.809111	1.33703	1.03354	2.48129	2.41227	2.76296	1.02402	14.4691	8.18729	0.00449515
	58	0.636263	0.50432	0.875367	1.17525	0.553399	0.372034	0.65237	0.781672	1.27052	1.06186	2.06093	1.82676	2.68838	0.882788	11.0294	16.061	0.0271721
	59	0.613163	0.473129	0.858424	1.13044	0.509556	0.361744	0.661896	0.768238	1.24617	1.08417	-1.85513	1.83971	2.12758	1.50986	15.1062	8.57643	0.0104343
	60	0.626277	0.487769	0.879363	1.18491	0.53779	0.38509	0.636403	0.799363	1.30323	1.04557	2.2679	1.88737	2.98789	1.73453	6.02071	12.5701	0.0126572
	61	0.627832	0.493401	0.872521	1.17211	0.540904	0.374596	0.590288	0.821167	1.36862	1.04213	0.630935	2.54044	2.37008	1.17807	10.6591	10.3562	0.0249126
	62	0.608968	0.545515	0.877448	1.24376	0.636521	0.37878	0.615048	0.809095	1.33428	1.00954	3.67816	2.27059	1.99005	1.10155	14.4312	2.5777	0.0577437
	63	0.602827	0.483706	0.870614	1.20556	0.544408	0.35478	0.684614	0.739571	1.17789	1.07848	-1.24285	1.73353	1.46992	1.47502	1.09712	6.72021	0.0671136
	64	0.689314	0.561275	0.888236	1.15909	0.606709	0.364148	0.613238	0.803033	1.33285	1.0511	0.5805	2.15613	2.76446	0.751726	19.02	6.64047	0.0506215
	65	0.603997	0.470201	0.844834	1.08726	0.501005	0.351672	0.617181	0.794375	1.32291	1.10016	-2.51598	2.14647	2.61192	1.28384	9.65461	17.8558	0.0326061
	66	0.682178	0.569309	0.87744	1.15174	0.616008	0.354023	0.653619	0.770163	1.25914	1.06328	1.14175	1.59631	2.78011	1.69867	12.782	2.18995	0.019017
	67	0.669351	0.544793	0.886456	1.1797	0.597471	0.37688	0.605618	0.813623	1.34756	1.04011	0.544846	2.28858	2.74695	0.832645	14.4493	7.35631	0.0762643
	68	0.689528	0.583089	0.864344	1.08569	0.615202	0.357127	0.603223	0.80563	1.34591	1.0792	-2.60092	2.27744	2.76367	0.961105	10.8533	3.51813	0.0356064
	69	0.637228	0.543264	0.879317	1.21397	0.614955	0.363062	0.665217	0.76629	1.23971	1.05035	2.9871	1.56596	2.46727	1.03568	13.2778	5.92424	0.062485
	70	0.64759	0.544442	0.879835	1.20122	0.609354	0.367109	0.599996	0.812249	1.3532	1.03574	2.87617	2.31415	2.59308	0.650434	12.8813	10.4622	0.0707929
	71	0.614398	0.478776	0.861423	1.15118	0.520819	0.36094	0.617514	0.798833	1.32531	1.06963	-0.44166	2.05895	2.3395	1.53628	7.39173	13.8893	0.0554712
	72	0.633582	0.503247	0.867817	1.15956	0.548522	0.359374	0.610322	0.802457	1.3359	1.06438	1.02253	2.04924	2.7297	1.0404	7.38529	15.805	0.0820685
	73	0.604299	0.467936	0.855705	1.14143	0.507794	0.372621	0.662718	0.774304	1.25064	1.08469	-2.52346	2.34886	1.58176	0.947156	4.95916	12.2205	0.0226626
	74	0.680755	0.574013	0.868869	1.13205	0.616814	0.391624	0.639768	0.800647	1.30004	1.05338	-2.02506	2.08376	2.73805	0.9686	17.6558	1.97594	0.0212533
	75	0.647222	0.516767	0.870988	1.15358	0.560361	0.363602	0.633457	0.790024	1.30044	1.06929	-0.861384	1.96611	2.32377	1.18385	8.8524	9.17321	0.0876888
	76	0.609342	0.49392	0.846503	1.14744	0.540852	0.366911	0.69029	0.742656	1.17232	1.08435	-1.15148	1.43025	2.89217	1.11422	7.44932	10.3693	0.0108533
	77	0.625804	0.513484	0.881651	1.21598	0.580425	0.398765	0.655606	0.794356	1.27626	1.03102	2.51867	1.95958	2.42177	0.784626	14.3369	8.72586	0.0211494
	78	0.622836	0.548751	0.877207	1.22986	0.631612	0.373645	0.584412	0.82398	1.37647	1.00652	2.71612	2.52794	2.34949	1.51414	7.81461	2.09379	0.0590561
	79	0.635148	0.516639	0.877054	1.19463	0.57498	0.368979	0.681927	0.754642	1.20241	1.05614	1.22587	1.65696	2.5305	0.697295	2.29245	15.7707	0.0170976
	80	0.66209	0.534315	0.879149	1.16459	0.581468	0.362568	0.569649	0.827085	1.39408	1.04411	-0.072659	2.75342	2.60535	0.828069	3.4722	10.3092	0.0784721
	81	0.613025	0.509891	0.883095	1.2334	0.585195	0.401639	0.706562	0.75205	1.15693	1.02595	-1.1235	2.07119	1.40363	0.753839	2.81307	5.49834	0.00322906
	82	0.639905	0.55322	0.863569	1.1847	0.616747	0.412035	0.669721	0.792341	1.25683	1.03588	-3.14051	2.23631	2.07141	0.781258	10.4801	2.46908	0.0667415
	83	0.620867	0.561562	0.883346	1.24479	0.655476	0.371486	0.695691	0.738639	1.15586	1.02972	-1.3015	1.71705	1.76896	0.585215	4.1121	3.27264	0.0964079
	84	0.635879	0.506854	0.886138	1.20359	0.56551	0.419941	0.627581	0.821723	1.32698	1.0237	-0.811002	2.38211	2.95749	0.792175	11.3827	8.65632	0.045095
	85	0.666249	0.528003	0.881527	1.15229	0.569241	0.376925	0.638743	0.793613	1.2965	1.06127	0.220462	1.96831	2.81188	0.841842	13.3295	10.2687	0.0328246
	86	0.601521	0.499397	0.862295	1.20543	0.564753	0.356586	0.612073	0.800034	1.33242	1.04048	1.83373	2.09522	1.93771	1.93113	10.6778	5.54957	0.0660129
	87	0.683177	0.561468	0.875317	1.13157	0.600683	0.373334	0.629801	0.797447	1.30987	1.06272	-2.01309	2.1613	2.4361	0.839885	14.352	4.11773	0.0414072
	88	0.618092	0.489235	0.86672	1.17386	0.538601	0.430541	0.672951	0.800559	1.2592	1.04945	-3.19407	2.2858	2.29522	0.429849	11.5006	12.9495	0.0396151
	89	0.603204	0.494474	0.879354	1.22987	0.566225	0.399169	0.667709	0.786355	1.25451	1.03239	0.937685	1.67479	2.48984	1.59049	18.1717	5.28911	0.0805288
	90	0.617452	0.520498	0.86555	1.20266	0.586752	0.36159	0.695563	0.725867	1.13241	1.05722	-0.802743	1.50665	2.1176	0.521976	4.86981	8.60108	0.0104293
	91	0.62968	0.488185	0.875137	1.16642	0.532382	0.380825	0.662023	0.779738	1.25635	1.05794	0.720325	1.72011	2.76988	1.46051	17.3359	8.39023	0.00937323
	92	0.600164	0.465524	0.849664	1.12774	0.503265	0.35165	0.6672	0.756942	1.22733	1.0977	-2.58961	2.13387	1.56412	1.11026	9.39722	9.14758	0.0111007
	93	0.607607	0.487529	0.876659	1.21303	0.55052	0.36214	0.677286	0.75441	1.20936	1.0622	0.775474	1.65873	1.97109	0.825498	11.6244	11.8288	0.0736944
	94	0.614202	0.544039	0.880504	1.24271	0.632968	0.424011	0.690236	0.784771	1.22278	1.00382	1.80819	1.91347	2.62704	0.735692	15.6482	3.67868	0.0054683
	95	0.682883	0.571786	0.886098	1.17593	0.626579	0.365675	0.614419	0.803079	1.3315	1.0389	0.634698	1.99885	2.92867	1.59612	16.1798	2.47265	0.0789325
	96	0.661804	0.552955	0.889982	1.20589	0.618749	0.393431	0.642689	0.799764	1.29593	1.03168	0.993408	1.96678	2.93023	0.795606	13.3141	6.26897	0.086691
	97	0.612339	0.501739	0.861553	1.18795	0.559807	0.389569	0.650451	0.792755	1.28149	1.04568	-2.20163	2.13279	1.82844	1.69397	14.8782	3.14993	0.0811565
	98	0.62263	0.51226	0.871497	1.20026	0.574236	0.358927	0.686905	0.740067	1.17454	1.06138	0.524703	1.51343	2.70527	0.345217	18.1654	14.9135	0.0342844
	99	0.603411	0.475811	0.856815	1.1634	0.522955	0.360531	0.587222	0.816477	1.36974	1.05755	0.636762	2.23925	2.85865	1.18118	17.8293	17.4546	0.0835039
	100	0.629014	0.521784	0.884933	1.22302	0.592923	0.40103	0.686868	0.772656	1.21533	1.02495	0.9978	1.88522	2.02364	0.703134	14.4533	4.98008	0.008316
	101	0.62711	0.473843	0.872868	1.13321	0.507118	0.351491	0.620701	0.792036	1.3172	1.06855	-1.1109	2.43489	1.84988	1.12262	17.8859	12.0288	0.00572386
	102	0.62183	0.521955	0.87943	1.22286	0.594633	0.354845	0.675678	0.750676	1.20742	1.04856	0.586827	1.57732	1.84278	1.8486	12.0684	2.39851	0.0778548
	103	0.640545	0.565551	0.881278	1.22229	0.646113	0.35964	0.593686	0.812393	1.36041	1.02184	3.54623	2.50765	2.14789	0.568545	18.9913	5.75739	0.0700957
	104	0.615666	0.4943	0.880968	1.21463	0.557849	0.362206	0.671185	0.76044	1.22523	1.0549	0.961618	2.23084	1.35571	0.654455	3.57172	11.4475	0.0278662
	105	0.604864	0.541245	0.893544	1.2696	0.644417	0.426991	0.665784	0.803162	1.2701	0.986661	0.605062	2.34302	1.98042	1.00981	14.8932	1.04614	0.0962738
	106	0.651952	0.523766	0.882285	1.18249	0.576162	0.396375	0.63614	0.80528	1.30737	1.04441	-0.283549	2.04092	2.99379	0.801906	12.5009	10.2714	0.0891446
	107	0.627434	0.507122	0.874602	1.19405	0.564629	0.387819	0.671895	0.776444	1.24016	1.05228	-0.341266	1.59856	2.68069	1.51293	16.5763	5.63959	0.0668307
	108	0.616846	0.516529	0.85345	1.17547	0.573999	0.408178	0.631876	0.813662	1.31748	1.03367	-3.0409	2.59708	1.87609	1.32248	10.7439	1.85847	0.0415944
	109	0.670029	0.563836	0.879	1.17596	0.61969	0.354937	0.63249	0.786051	1.29881	1.04877	3.7215	1.88304	2.32242	1.57968	3.04159	5.29173	0.00702775
	110	0.650736	0.516924	0.878375	1.16674	0.563231	0.393029	0.593658	0.827647	1.36798	1.03838	-1.13379	2.56078	2.80216	1.11214	7.15964	7.4367	0.0380161
	111	0.633761	0.557595	0.878079	1.22201	0.637274	0.357831	0.644462	0.779319	1.27876	1.02754	2.47896	2.0941	1.61411	1.71354	10.4113	1.00672	0.0762946
	112	0.663611	0.536291	0.867574	1.12184	0.57263	0.386589	0.619178	0.810451	1.3303	1.07074	-2.72544	2.309	2.89915	0.593346	15.6048	10.3555	0.088968
	113	0.606627	0.486878	0.878653	1.2177	0.551476	0.418065	0.690059	0.781151	1.21947	1.03424	0.943571	1.63358	2.90561	1.25664	4.40635	9.86157	0.0172438
	114	0.60161	0.489555	0.864142	1.20048	0.550662	0.375907	0.693438	0.746532	1.17244	1.06587	0.374637	1.41451	2.85835	0.734035	12.1639	13.2065	0.0492339
	115	0.615692	0.513489	0.848845	1.16386	0.56757	0.386853	0.69163	0.757916	1.19102	1.07668	-3.39753	1.82625	2.13993	0.574359	2.85832	10.5529	0.0755766
	116	0.624443	0.557462	0.886011	1.24446	0.649162	0.38426	0.659209	0.783789	1.26342	1.02047	3.37876	1.72403	2.50551	0.993228	11.0866	3.77344	0.0632626
	117	0.616329	0.471187	0.87376	1.1677	0.514632	0.406179	0.642686	0.806329	1.30027	1.04755	-1.02703	2.19304	2.78456	1.00998	13.9963	15.1647	0.0152572
	118	0.609688	0.504006	0.881829	1.23191	0.57779	0.352636	0.686941	0.733736	1.16465	1.06456	-1.48926	2.36115	1.10101	0.330015	1.90497	8.35995	0.0720016
	119	0.600949	0.471281	0.871315	1.19665	0.526385	0.354939	0.667303	0.759104	1.22947	1.06207	0.511925	2.01091	1.36512	1.78864	6.29284	5.8767	0.00781008
	120	0.694887	0.57855	0.881877	1.1445	0.622128	0.3533	0.592569	0.810098	1.36047	1.03915	-1.54479	2.38767	2.3988	2.77444	2.36753	1.336	0.0177354
	121	0.602154	0.47675	0.857902	1.17078	0.526257	0.372901	0.686559	0.752589	1.19244	1.08034	-0.882866	1.41271	2.80991	1.693	5.67801	10.9025	0.0385069
	122	0.640587	0.514295	0.858722	1.12561	0.552593	0.355531	0.637661	0.782829	1.29004	1.08889	-2.75751	2.32397	1.78137	0.867884	8.04864	8.03558	0.0908024
	123	0.673922	0.554568	0.881229	1.16629	0.604208	0.35942	0.580527	0.81973	1.37876	1.04208	-0.179911	2.51987	2.42276	1.07516	11.0058	4.93461	0.0910771
	124	0.633242	0.499953	0.861951	1.13449	0.538586	0.381268	0.602331	0.817533	1.35334	1.06367	-1.93175	2.23992	2.79649	1.61314	5.76402	9.3385	0.056259
	125	0.609232	0.484057	0.864154	1.18017	0.536017	0.356504	0.641606	0.78059	1.28338	1.07101	3.11757	1.66389	2.71804	1.49915	10.1392	15.3646	0.0499233
	126	0.648417	0.536495	0.871804	1.17644	0.591013	0.385555	0.68419	0.76446	1.21037	1.05503	0.466618	1.56686	2.89179	1.0746	4.68182	6.45783	0.0136142
	127	0.602106	0.465969	0.849646	1.11916	0.50162	0.366348	0.639941	0.787166	1.29042	1.08954	-2.31135	2.02107	2.31497	1.5673	6.32891	14.4148	0.0361282
	128	0.636802	0.556871	0.846463	1.15268	0.613375	0.36193	0.680622	0.750666	1.19959	1.07189	-2.31085	1.59595	2.21369	1.71025	7.37438	1.81622	0.0333108
	129	0.618969	0.517034	0.872446	1.21114	0.584784	0.351525	0.645448	0.77497	1.27399	1.05236	2.79689	2.58654	1.24927	0.592283	5.74528	8.76242	0.0306793
	130	0.600694	0.471259	0.873734	1.20212	0.528015	0.354228	0.668771	0.757231	1.22533	1.06686	0.779488	1.97741	1.43729	1.37761	1.72098	10.4695	0.0208222
	131	0.64274	0.554587	0.868803	1.19198	0.620102	0.353756	0.68616	0.736195	1.17001	1.06147	-0.0027486	1.36093	2.48033	1.23144	18.5307	2.07864	0.0463251
	132	0.610709	0.495593	0.884995	1.23021	0.566174	0.457239	0.677324	0.812333	1.26249	1.00606	-1.24907	2.23173	2.93588	0.656885	11.4925	6.37388	0.0140618
	133	0.602798	0.522007	0.876882	1.24145	0.606275	0.381972	0.698774	0.744486	1.15953	1.03901	0.976057	1.35902	2.34322	1.18028	11.028	3.28735	0.0517806
	134	0.618282	0.585086	0.868482	1.2284	0.679549	0.353123	0.691484	0.724424	1.13871	1.04323	1.42015	1.28867	2.50803	1.2431	5.39067	1.51996	0.0613984
	135	0.617644	0.49485	0.868043	1.18503	0.548859	0.350555	0.633352	0.783097	1.29561	1.06539	3.19539	2.05433	1.9628	0.941287	4.77245	18.5897	0.0403516
	136	0.654313	0.544694	0.849218	1.06432	0.575228	0.363506	0.616767	0.800572	1.32725	1.07936	-3.07984	2.69282	2.84047	1.23822	3.56722	8.5379	0.00160413
	137	0.625212	0.541025	0.838533	1.1428	0.594789	0.40834	0.643632	0.806872	1.2995	1.05018	-3.68998	2.1822	2.61984	1.30599	13.4972	2.15002	0.0358667
	138	0.60423	0.503544	0.875059	1.22726	0.576666	0.38821	0.675774	0.773583	1.23207	1.04626	3.14723	1.59942	2.51644	1.02098	5.35706	11.6167	0.0551474
	139	0.660767	0.538913	0.872859	1.15508	0.584806	0.373715	0.681597	0.758506	1.20751	1.06716	-1.59307	1.80696	2.10383	0.778322	3.41985	6.68999	0.0128969
	140	0.657974	0.524035	0.869527	1.12572	0.559871	0.354026	0.583111	0.815835	1.374	1.06939	-0.847011	2.35687	2.67793	1.13716	4.45081	11.7165	0.0727837
	141	0.601687	0.535578	0.885918	1.26048	0.632815	0.40168	0.686617	0.773315	1.21639	1.01458	2.51138	1.5563	2.47008	1.43656	3.738	3.11924	0.0504532
	142	0.619792	0.50425	0.867837	1.1904	0.561766	0.352819	0.675386	0.749422	1.20636	1.07716	2.19553	1.3844	2.7381	1.22361	11.1749	10.0464	0.0551221
	143	0.619373	0.494216	0.860568	1.16175	0.54151	0.355793	0.59043	0.812478	1.36412	1.05515	-0.268879	2.16314	2.49857	2.00079	11.7678	8.5073	0.0732979
	144	0.626027	0.493558	0.869451	1.1685	0.5406	0.37046	0.617423	0.803617	1.32833	1.05346	-0.279863	2.39289	1.85074	1.35414	3.63275	9.98579	0.0318152
	145	0.600513	0.538714	0.890628	1.26884	0.641469	0.433088	0.690237	0.790362	1.22805	0.991033	1.40419	1.87146	2.45993	0.904257	8.11542	2.10436	0.0200552
	146	0.633626	0.516918	0.873853	1.19061	0.574416	0.352399	0.649148	0.772664	1.26724	1.0642	2.08967	1.75214	2.47371	0.708911	8.46073	15.4395	0.0940846
	147	0.603817	0.482094	0.884494	1.22828	0.549698	0.439605	0.659643	0.813434	1.28467	1.00735	0.269442	2.10892	2.89584	1.4106	13.1902	5.02934	0.00775643
	148	0.644326	0.544094	0.848928	1.12829	0.589427	0.382828	0.662775	0.78036	1.25589	1.08037	-2.70011	1.77747	2.94433	1.03188	10.9186	6.42567	0.092262
	149	0.654861	0.561928	0.844366	1.09696	0.602151	0.379084	0.634175	0.797661	1.30477	1.07658	-3.45309	2.23204	2.43262	1.09374	7.21717	3.02352	0.0234436
	150	0.619453	0.50517	0.867624	1.19143	0.563321	0.363336	0.579433	0.822084	1.38108	1.04062	2.20809	2.46045	2.87606	0.756063	16.7037	15.8726	0.0868081
	151	0.621047	0.499197	0.847835	1.12233	0.538822	0.377508	0.650226	0.786268	1.27688	1.08431	-2.73707	1.88066	2.55879	1.67457	6.18413	8.18488	0.0474493
	152	0.616069	0.496883	0.863647	1.18041	0.550571	0.376294	0.596493	0.818517	1.36039	1.03058	-1.04381	2.61554	1.77185	1.76985	16.8391	2.16874	0.0199794
	153	0.620835	0.515643	0.880422	1.22213	0.586527	0.379452	0.662032	0.778924	1.25563	1.04131	1.59792	1.68079	2.31363	1.43119	9.44799	5.76209	0.0940278
	154	0.629262	0.514579	0.881762	1.21191	0.579588	0.394552	0.632461	0.806566	1.31252	1.03282	1.18706	2.0508	2.5908	0.968689	11.3001	8.93101	0.093757
	155	0.649083	0.506231	0.878268	1.15372	0.546833	0.381739	0.65191	0.787461	1.27567	1.05849	0.263418	1.82508	2.88989	1.43172	7.73158	9.06956	0.00976068
	156	0.671167	0.539226	0.881577	1.1559	0.582885	0.380011	0.616777	0.808668	1.33204	1.05274	-1.19793	2.37598	2.20947	0.953752	3.71705	7.31643	0.0572858

## Sheet: Ohio
COMPROMISE SOLUTIONS
		Metrics regarding Q					Metrics regarding TWSA				Parameter values (names and units based on Table 2; values of non-disturbed parameters are included in Table 2)
		NSE	KGE	CC	RBias	RVar	NSE	KGE	CC	RVar	EP-PTh	SN-MT	SL-MSM	SL-RC	GW-MM	GW-DC	SW-RRM	SW-LD	SW-WD	SW-DC
EnCDA		0.79053	0.65577	0.92084	1.1255	0.68938	0.91039	0.95176	0.95469	0.98345	1.17118	0.796261	1.85211	2.56121	0.616698	0.0109434	2.41908	5.58475	13.149	0.0745954
POC		0.870912	0.795475	0.947377	1.10647	0.833487	0.85634	0.852929	0.944976	1.13639	1.05935	-2.20344	1.30591	2.99598	0.32705	0.00568116	1.04632	19.2101	12.8103	0.0132148
GLUE		0.859266	0.761675	0.942896	1.10565	0.794147	0.842808	0.852423	0.938656	1.13422	1.08821	-2.55913	1.03676	2.89641	1.01701	0.00890846	1.33846	11.0598	8.82171	0.033548
BEHAVIORAL SOLUTIONS (all behavioral solutions for each methodology; no behavioral EnCDA ensemble members in this unit)
		Metrics regarding Q					Metrics regarding TWSA				Parameter values (names and units based on Table 2; values of non-disturbed parameters are included in Table 2)
	Sl. No.	NSE	KGE	CC	RBias	RVar	NSE	KGE	CC	RVar	EP-PTh	SN-MT	SL-MSM	SL-RC	GW-MM	GW-DC	SW-RRM	SW-LD	SW-WD	SW-DC
EnCDA	-	-	-	-	-	-	-	-	-	-	-	-	-	-	-	-	-	-	-	-
POC	1	0.890009	0.861837	0.94845	1.06454	0.889245	0.817307	0.771885	0.945291	1.22146	1.08475	-1.9264	1.56231	2.99902	0.310161	0.0063179	1.02577	17.3254	6.41677	0.0345016
	2	0.866115	0.788775	0.946852	1.11433	0.830531	0.860745	0.869034	0.94401	1.11839	1.05469	-2.243	1.26004	2.99758	0.335112	0.0061718	1.04724	18.6388	13.1346	0.0117441
	3	0.817759	0.689574	0.947918	1.18451	0.755851	0.885619	0.904467	0.950193	1.08152	0.98652	-2.66668	1.24641	2.99869	0.528812	0.00638141	1.01075	17.9741	12.7571	0.0110724
	4	0.860325	0.772702	0.947784	1.12776	0.819401	0.865573	0.874016	0.94543	1.11355	1.03963	-2.33091	1.27941	2.99801	0.334791	0.00571025	1.04508	18.5875	13.8241	0.0132396
	5	0.870912	0.795475	0.947377	1.10647	0.833487	0.85634	0.852929	0.944976	1.13639	1.05935	-2.20344	1.30591	2.99598	0.32705	0.00568116	1.04632	19.2101	12.8103	0.0132148
	6	0.832018	0.710903	0.948927	1.17016	0.771936	0.880118	0.893198	0.949244	1.09397	1.00071	-2.20139	1.24625	2.99902	0.508201	0.00638928	1.00992	17.5649	11.4833	0.011361
	7	0.88547	0.840669	0.947677	1.07354	0.868694	0.833294	0.813349	0.942612	1.17761	1.09099	-1.51179	1.35694	2.99899	0.306024	0.00631058	1.03178	17.473	12.5151	0.0236683
	8	0.842505	0.733854	0.947842	1.1543	0.789514	0.876083	0.892977	0.947289	1.09314	1.01587	-2.41608	1.2452	2.99637	0.406099	0.00643603	1.02564	18.6252	14.8769	0.0117572
	9	0.880803	0.826022	0.946829	1.08152	0.855793	0.842722	0.833222	0.942609	1.15659	1.08604	-1.93551	1.30133	2.99598	0.305887	0.00562485	1.11566	17.5269	12.7422	0.0140059
	10	0.875723	0.807025	0.947533	1.09685	0.841549	0.850275	0.845447	0.943606	1.1439	1.07078	-1.93551	1.29261	2.99986	0.305887	0.00562485	1.11566	17.5269	14.7373	0.0140059
	11	0.851766	0.753589	0.947415	1.13994	0.804117	0.871106	0.885489	0.946103	1.10103	1.02846	-2.42626	1.26658	2.99637	0.339143	0.00617797	1.04687	18.6273	16.5797	0.0110463
GLUE	1	0.802573	0.632953	0.948605	1.18667	0.688173	0.812506	0.820583	0.93137	1.16577	0.997713	1.96853	1.1757	2.38073	0.863228	0.00117458	2.28787	14.4071	13.3414	0.0901853
	2	0.834069	0.75	0.926665	1.08996	0.778576	0.847352	0.905204	0.930218	1.06416	1.13704	-3.66685	0.84057	2.98586	0.996475	0.00459575	1.65077	6.8943	16.4707	0.0599699
	3	0.833419	0.71241	0.93171	1.08231	0.733037	0.805847	0.841651	0.923152	1.13845	1.17742	-0.114827	0.79482	2.65721	1.27002	0.00463063	2.86513	3.82845	9.50857	0.0252793
	4	0.84542	0.7273	0.936253	1.07704	0.746294	0.80928	0.786147	0.938251	1.20474	1.12462	-1.60288	1.0533	2.74539	0.688695	0.00317527	2.90703	10.9669	16.7027	0.0111445
	5	0.852332	0.786349	0.937973	1.10854	0.82674	0.812538	0.770831	0.94349	1.22209	1.05745	-3.28045	1.31271	2.8235	0.568223	0.0102815	2.66394	7.89428	6.15762	0.0160508
	6	0.823473	0.709973	0.93532	1.14173	0.755367	0.802117	0.82844	0.924558	1.15408	1.10219	3.19559	0.866092	2.2979	0.959167	0.0106548	2.54934	4.55153	16.1545	0.00956527
	7	0.816237	0.688975	0.937498	1.15564	0.73807	0.850118	0.913482	0.929901	1.05071	1.07236	3.09213	0.820731	2.76426	0.858095	0.00213872	1.30768	14.5747	13.9921	0.0228708
	8	0.849643	0.734751	0.95015	1.14915	0.786397	0.833502	0.801846	0.945308	1.19046	1.00766	-3.49832	1.51024	2.55313	0.420227	0.00251443	2.01455	10.5118	5.59594	0.0225729
	9	0.802085	0.669947	0.926861	1.13491	0.707795	0.824789	0.878455	0.924109	1.09494	1.11766	-2.86069	0.756452	2.30719	1.04156	0.00366577	3.49319	13.7659	15.8455	0.0881543
	10	0.811717	0.752817	0.938566	1.17192	0.833362	0.826763	0.857505	0.929781	1.12399	1.01205	-3.39439	1.05745	2.85478	0.509854	0.0143393	3.23948	3.2962	9.70014	0.0239598
	11	0.8043	0.668382	0.930462	1.14349	0.709234	0.810804	0.863339	0.920417	1.1111	1.12922	-0.226427	0.744065	2.05936	1.21972	0.0059887	3.44831	7.26841	11.0316	0.0902517
	12	0.84106	0.71421	0.942292	1.12879	0.751486	0.813431	0.875998	0.918713	1.09364	1.14069	1.68215	0.89048	1.75802	0.951438	0.00449585	1.95697	14.116	3.95872	0.0363779
	13	0.823134	0.75326	0.939989	1.162	0.82383	0.801267	0.884573	0.896643	0.948612	1.11435	-0.697029	0.647921	2.19427	0.892761	0.0117277	1.49567	16.4459	8.43851	0.0790491
	14	0.850715	0.782733	0.929877	1.03119	0.79674	0.81797	0.829719	0.931807	1.15603	1.1834	-3.38898	1.08201	2.5862	0.867897	0.00728971	1.20914	5.07873	14.8227	0.008645
	15	0.838687	0.68509	0.9432	1.10506	0.708616	0.815663	0.77559	0.943674	1.21723	1.08938	-1.6666	1.14961	2.42521	1.2821	0.00472727	1.90601	4.19836	9.36822	0.0791573
	16	0.814761	0.681205	0.933205	1.13691	0.719956	0.806962	0.813816	0.930414	1.17269	1.10746	2.64265	0.857477	2.35828	0.988205	0.00716069	3.01446	12.686	17.4889	0.0276579
	17	0.838412	0.709571	0.945054	1.14484	0.754334	0.837075	0.848342	0.936762	1.13784	1.05727	3.25876	1.01264	2.96113	1.17073	0.00304324	1.47963	6.04007	4.67738	0.071662
	18	0.80063	0.655315	0.934464	1.15862	0.701083	0.805231	0.873283	0.915022	1.094	1.12304	3.45641	0.809628	1.70058	1.00618	0.00225213	2.99989	1.13302	11.2911	0.0603228
	19	0.83085	0.760803	0.935682	1.13954	0.816678	0.805305	0.836344	0.924173	1.14503	1.05604	-3.20329	1.00508	2.68935	2.21131	0.0187827	1.31006	15.8813	6.48359	0.0595018
	20	0.820902	0.690905	0.948282	1.18104	0.754867	0.846023	0.814298	0.948165	1.17832	0.993097	-0.878368	1.28721	2.69354	0.850526	0.00519717	2.61733	2.49389	2.77284	0.0496256
	21	0.822463	0.698905	0.933508	1.13009	0.736724	0.823885	0.80144	0.941098	1.18962	1.07036	-2.73072	1.00919	2.6387	0.821533	0.00532689	3.12848	13.2447	17.8095	0.0899315
	22	0.829833	0.729794	0.938053	1.14493	0.780523	0.812063	0.871726	0.919038	1.0995	1.09244	-3.3868	0.970698	1.73714	0.571962	0.0082541	2.89798	1.0802	14.5773	0.0674437
	23	0.800697	0.739356	0.934092	1.17596	0.819366	0.819231	0.863909	0.905119	0.902438	1.09797	1.45895	0.583048	2.69409	0.802685	0.00829885	1.32279	14.3396	8.13549	0.0505216
	24	0.815346	0.649484	0.938716	1.12021	0.676494	0.804719	0.812005	0.929814	1.1744	1.13211	1.71814	0.971137	1.83542	0.881179	0.00419459	2.45617	17.128	18.2637	0.0127943
	25	0.80039	0.6355	0.948986	1.19385	0.695565	0.804549	0.80757	0.93082	1.17956	0.995112	1.50017	1.3969	1.59683	0.716665	0.00168538	1.98099	17.524	1.11534	0.0158223
	26	0.831852	0.727627	0.945074	1.16247	0.788402	0.826824	0.797255	0.94339	1.19468	1.02169	1.42228	1.19489	2.76069	0.413115	0.0056533	2.67734	17.6956	15.1975	0.0382586
	27	0.835853	0.682023	0.941194	1.08926	0.700526	0.803877	0.850986	0.919901	1.12566	1.17995	-2.53928	1.11798	1.44308	1.30635	0.00491421	1.48048	4.51574	2.91986	0.0584395
	28	0.81343	0.753746	0.931044	1.15241	0.819291	0.809949	0.898845	0.910252	1.04666	1.09119	-2.81815	0.79108	2.10864	0.695277	0.00730804	3.83432	13.3663	1.67448	0.0398908
	29	0.838839	0.695409	0.951531	1.16074	0.745854	0.838833	0.855598	0.936083	1.12949	1.04983	-1.22254	1.12371	1.79342	0.806674	0.00572289	1.8344	1.96846	6.75739	0.0837005
	30	0.841171	0.743926	0.941078	1.13656	0.791544	0.80598	0.732508	0.950552	1.26288	1.01468	-2.79563	1.74168	2.36908	0.475255	0.0151141	1.979	10.3848	6.33684	0.040669
	31	0.802259	0.679671	0.935654	1.17254	0.73789	0.81588	0.758859	0.947932	1.23545	1.00424	-1.07989	1.33804	2.34148	0.894674	0.013629	2.28909	2.70912	14.8991	0.0342429
	32	0.820396	0.681782	0.932112	1.10835	0.708599	0.806435	0.815145	0.929848	1.17103	1.1256	-1.84091	0.902619	2.27573	1.97153	0.00767353	3.06136	15.5131	2.68001	0.00360794
	33	0.841315	0.745761	0.930408	1.07757	0.768102	0.805522	0.842248	0.922846	1.1376	1.17408	-0.938375	0.85872	2.47084	0.917303	0.0040165	3.13851	1.10411	12.2334	0.0389986
	34	0.837308	0.75623	0.925131	1.04478	0.772376	0.81106	0.87055	0.9188	1.10082	1.19823	-2.98992	0.92978	2.44564	1.11307	0.00236933	1.74845	19.7605	6.73592	0.0681842
	35	0.802155	0.632643	0.935308	1.1247	0.660566	0.806896	0.819042	0.929122	1.1665	1.11268	0.205317	0.821465	2.61566	2.50789	0.00479871	2.91605	10.5531	1.19736	0.0635041
	36	0.850184	0.752736	0.94356	1.12909	0.796803	0.804979	0.802462	0.93228	1.18557	1.06679	-2.5893	1.24584	1.89191	0.525984	0.0123334	2.1578	5.56035	12.3557	0.0653458
	37	0.813907	0.676855	0.940096	1.16329	0.727656	0.810101	0.803891	0.934273	1.18477	1.05329	0.553956	1.03865	1.99647	1.3217	0.0118924	1.69693	5.64069	13.8927	0.0576487
	38	0.815186	0.717457	0.930449	1.14444	0.767343	0.807984	0.821589	0.929011	1.16368	1.07814	-0.764837	0.884085	2.46184	0.770159	0.00890778	3.78954	10.3325	10.2555	0.0281643
	39	0.824343	0.718729	0.94463	1.17135	0.783925	0.830054	0.837312	0.935801	1.14949	1.03812	2.4902	1.00114	2.49925	0.555586	0.00556861	2.40518	2.61064	19.3194	0.0880508
	40	0.859266	0.761675	0.942896	1.10565	0.794147	0.842808	0.852423	0.938656	1.13422	1.08821	-2.55913	1.03676	2.89641	1.01701	0.00890846	1.33846	11.0598	8.82171	0.033548
	41	0.802477	0.69241	0.937317	1.18007	0.758637	0.817318	0.893798	0.916263	1.06532	1.07887	-0.144099	0.777059	1.85152	0.67708	0.00631115	3.45698	5.44731	10.7163	0.054574
	42	0.805835	0.704988	0.934695	1.17041	0.768206	0.836505	0.884853	0.928794	1.09049	1.04778	-3.0266	0.841357	2.47867	0.819386	0.00725098	3.39865	17.5716	8.94552	0.0839783
	43	0.804227	0.645865	0.939714	1.16188	0.690854	0.804342	0.865522	0.916532	1.10544	1.11051	-3.52229	1.05991	1.22544	0.834825	0.01109	2.07627	14.4189	15.626	0.0707746
	44	0.81135	0.690248	0.938237	1.16794	0.747157	0.819811	0.89886	0.916266	1.05673	1.10138	0.252965	0.750464	1.8833	0.968404	0.00604264	3.03653	9.37466	6.17646	0.0830253
	45	0.839666	0.732427	0.936094	1.11421	0.766618	0.81453	0.845456	0.926502	1.13595	1.12226	-0.563907	0.834027	2.60806	1.02732	0.00783838	2.81013	6.6809	8.2423	0.0153078
	46	0.842011	0.74192	0.943287	1.14213	0.79218	0.822755	0.891305	0.919973	1.07355	1.09486	0.19985	0.769214	2.75343	1.52534	0.009744	1.94798	11.0276	2.71432	0.0689644
	47	0.829121	0.729939	0.931558	1.12157	0.768766	0.820518	0.887665	0.919651	1.07851	1.12932	-3.44251	0.874436	1.8993	0.97055	0.00696137	2.81327	15.221	3.25457	0.0102689
	48	0.826925	0.728669	0.92589	1.09613	0.757332	0.813684	0.896441	0.913367	1.05674	1.1161	2.36113	0.906621	2.87681	1.29731	0.0010689	2.06664	11.437	6.12529	0.00167965
	49	0.823277	0.691687	0.938238	1.1437	0.73431	0.821807	0.829932	0.933569	1.15656	1.06941	-1.81177	0.905305	2.6758	1.64423	0.0129501	1.56685	18.8375	18.8494	0.0612206
	50	0.808407	0.639684	0.938707	1.13437	0.671341	0.817502	0.802426	0.937989	1.18759	1.07226	-1.04681	0.928682	2.87959	1.61438	0.00349618	3.00533	18.0849	5.50273	0.0803192
	51	0.819449	0.668789	0.934007	1.09823	0.690653	0.808393	0.845448	0.92349	1.13428	1.15679	-3.09414	0.990326	1.71829	1.1052	0.00366356	2.39496	3.36104	10.5778	0.023161
	52	0.830109	0.775596	0.942041	1.15596	0.849417	0.802349	0.894542	0.907048	1.04981	1.07948	-0.128503	0.809123	2.35306	1.04135	0.0127343	2.3187	2.77411	2.72427	0.0899762
	53	0.843809	0.806237	0.946425	1.14451	0.882561	0.803339	0.896169	0.90704	1.04625	1.08639	1.60547	0.87416	2.40295	0.51246	0.0117988	1.61014	14.1719	7.83611	0.066128
	54	0.847732	0.791722	0.943287	1.13462	0.851539	0.812146	0.898243	0.91185	1.05083	1.09384	-1.07216	0.832545	2.56834	1.1342	0.0124077	1.70323	18.0554	2.12748	0.0998446
	55	0.846972	0.714954	0.943204	1.11418	0.745072	0.80125	0.820044	0.926206	1.16413	1.07878	2.84036	1.15127	2.40802	0.878149	0.00109668	1.76018	3.18636	11.8259	0.0625232
	56	0.826199	0.771431	0.94372	1.16459	0.851723	0.807631	0.815057	0.930426	1.17136	1.02166	1.66789	1.16108	2.73642	0.8883	0.0147605	2.26911	12.782	1.97091	0.0966161
	57	0.813842	0.714264	0.942621	1.18025	0.785845	0.809258	0.903803	0.907373	1.02596	1.06699	-1.87942	0.790229	1.89612	0.813684	0.0185289	2.21168	6.7167	13.28	0.00608931
	58	0.849953	0.745146	0.936798	1.0876	0.769172	0.800456	0.778006	0.936382	1.21268	1.12177	-0.429895	1.06405	2.49215	0.64318	0.00429089	2.93788	7.38027	16.145	0.0287714
	59	0.832966	0.692737	0.936657	1.09456	0.714593	0.816734	0.812814	0.935175	1.1756	1.10585	-2.18104	0.992114	2.89486	1.16906	0.00246514	2.54491	9.64078	11.7787	0.057713
	60	0.811121	0.66974	0.9449	1.18038	0.728893	0.839988	0.837934	0.940345	1.15069	1.02652	-0.0812001	1.00337	2.2246	0.978082	0.00764388	2.50347	5.7615	6.27402	0.0150725
	61	0.8454	0.742552	0.93302	1.06865	0.761086	0.802261	0.851948	0.918848	1.12383	1.18868	2.56075	0.842998	2.72751	1.32016	0.00251391	2.06839	19.7957	3.99946	0.0840148
	62	0.857378	0.813032	0.937673	1.09764	0.853242	0.81188	0.87438	0.918294	1.09542	1.11842	-1.94642	0.886566	2.94255	1.63108	0.0139952	1.43802	19.5681	1.45258	0.0120811
	63	0.838296	0.742195	0.936821	1.12612	0.784207	0.800819	0.814076	0.927481	1.1712	1.0889	-3.00042	1.11159	1.80456	0.444985	0.0047778	3.42488	18.8654	4.96992	0.0206141
	64	0.812362	0.660467	0.934308	1.12597	0.69162	0.808772	0.817188	0.930442	1.16906	1.11995	2.64849	0.786607	2.87977	1.55746	0.00419539	3.07781	17.4617	9.28411	0.0880065
	65	0.817367	0.662995	0.933971	1.09137	0.682409	0.820821	0.862272	0.925759	1.11601	1.1589	1.9673	0.820124	2.72049	1.67899	0.00295645	1.38096	3.33641	10.1129	0.006008
	66	0.831343	0.758305	0.928518	1.11293	0.798619	0.80538	0.898319	0.907483	1.04219	1.1831	1.93113	0.647005	2.60264	0.720941	0.00427297	2.90089	11.0348	16.3494	0.0893103
	67	0.809322	0.705312	0.930484	1.15229	0.757482	0.805554	0.758778	0.943532	1.23452	1.02532	-1.8741	1.22523	2.61185	1.09303	0.0179905	2.48485	12.4727	10.9356	0.00923501
	68	0.836876	0.86359	0.915438	0.990374	0.893397	0.802702	0.874527	0.913331	1.09073	1.25591	-1.99633	1.03506	2.45369	0.603434	0.00178096	1.1242	18.9821	4.2473	0.00928089
	69	0.850703	0.739453	0.941698	1.11345	0.772808	0.812764	0.813879	0.933091	1.17368	1.10301	-0.0408579	1.03257	2.23294	0.992165	0.00573034	2.56108	11.9489	2.67791	0.0641539
	70	0.810029	0.727475	0.947826	1.19539	0.817321	0.836534	0.799737	0.94714	1.19316	0.959054	-1.74976	1.82631	2.67623	0.478964	0.0169557	2.17921	10.9518	1.05287	0.0878085
	71	0.87432	0.828748	0.942556	1.07756	0.858538	0.804138	0.761127	0.942318	1.2318	1.09041	-1.45846	1.32108	2.99711	0.806455	0.00972921	1.89238	1.1452	5.60484	0.0808521
	72	0.822275	0.724076	0.93772	1.1561	0.781166	0.818636	0.810715	0.936544	1.17833	1.04195	0.313739	0.979295	2.96494	1.27118	0.0109475	2.70738	1.99956	5.50306	0.0224548
	73	0.823787	0.774317	0.942662	1.1643	0.856302	0.814481	0.904976	0.906021	0.985948	1.07729	0.464864	0.747234	2.54	0.464985	0.0114037	1.75186	2.71899	18.5096	0.0626911
	74	0.803391	0.65542	0.948754	1.19801	0.722691	0.851606	0.854863	0.942362	1.1332	1.00079	-1.49245	1.17235	1.78179	0.981451	0.00929517	2.37598	14.3987	9.30683	0.00116974
	75	0.846464	0.775582	0.942261	1.13439	0.829795	0.803431	0.754215	0.943799	1.23927	1.03619	1.48729	1.35284	2.99182	0.845154	0.0114074	1.97875	9.11519	4.87339	0.0825548
	76	0.811186	0.71371	0.930976	1.15268	0.767865	0.813645	0.855822	0.923646	1.1223	1.06395	-2.90597	0.815988	2.91372	1.8912	0.0156139	2.1791	7.57724	16.3094	0.042679
	77	0.840006	0.733395	0.932502	1.08852	0.757748	0.818767	0.873593	0.922096	1.09955	1.1595	3.51813	0.82673	2.94677	1.53561	0.00279715	1.59428	11.7743	1.7875	0.0628563
	78	0.820028	0.687011	0.937966	1.14765	0.73109	0.813237	0.70376	0.96116	1.29368	0.99427	-2.45227	2.03341	2.83745	0.677209	0.0121871	1.38003	11.4736	11.241	0.0501677
	79	0.809207	0.72548	0.935112	1.16862	0.793316	0.802201	0.74987	0.944404	1.24387	1.01074	2.16336	1.32075	2.64037	0.797488	0.0108682	2.74172	2.33606	6.7773	0.0754616
	80	0.830737	0.711826	0.944123	1.15818	0.765692	0.832918	0.916132	0.91811	1.01811	1.09068	-1.79663	0.838482	1.86153	1.25596	0.00928394	1.08306	11.0046	3.00291	0.0409712
	81	0.836157	0.725053	0.930425	1.07166	0.743835	0.803496	0.863714	0.916545	1.10775	1.15747	-2.19294	0.934362	2.37625	1.2216	0.00168748	2.41419	19.1456	3.07809	0.0748257
	82	0.814512	0.691324	0.943046	1.17681	0.753474	0.834624	0.858243	0.933483	1.12518	1.02803	-1.08407	0.956477	2.46229	0.875583	0.0154251	2.44013	11.8533	15.61	0.00430796
	83	0.839264	0.753866	0.953026	1.1729	0.831237	0.842952	0.884967	0.9321	1.09286	1.01807	-0.21139	1.08021	2.60951	0.70936	0.0105568	1.56921	9.23294	4.65641	0.0686526
	84	0.807179	0.69291	0.922961	1.12036	0.728186	0.828011	0.896776	0.921518	1.06705	1.12816	-2.94503	0.706747	2.84138	1.14622	0.00315712	3.53324	9.30233	10.7829	0.0479928
	85	0.808606	0.662859	0.941059	1.16959	0.71464	0.829653	0.83324	0.936512	1.1542	1.0503	-0.753605	0.982336	1.97683	1.05119	0.00619862	2.92526	3.47605	7.36533	0.0693913
	86	0.823384	0.733824	0.931889	1.13741	0.782449	0.80335	0.841982	0.921845	1.13734	1.08085	-2.90212	0.897887	2.4159	1.63467	0.0151397	2.13635	3.13914	9.28371	0.0188301
	87	0.819072	0.652237	0.941156	1.1261	0.681291	0.815701	0.803851	0.93683	1.1857	1.08777	0.113785	0.999147	2.30237	0.851405	0.00281416	2.73431	18.1947	15.4622	0.00971039
	88	0.815663	0.657233	0.942603	1.15418	0.699293	0.826634	0.773104	0.949041	1.2211	1.03335	-1.16285	1.18599	2.35397	1.10462	0.00714732	2.16671	18.0511	7.77875	0.0364671
	89	0.839923	0.720827	0.938182	1.11602	0.753717	0.832764	0.901451	0.923015	1.06152	1.14165	1.39147	0.76306	2.57155	1.36783	0.0045712	1.6835	15.9154	2.88819	0.0445911
	90	0.850546	0.775916	0.930742	1.05768	0.794841	0.800147	0.854074	0.917243	1.12019	1.20106	2.55902	0.846588	2.81648	1.04897	0.00225922	2.1056	18.6093	7.05545	0.0901056
	91	0.801237	0.650734	0.947472	1.19609	0.71579	0.808804	0.805818	0.933204	1.18233	0.966786	-0.644692	1.44657	2.5056	0.752499	0.00116475	3.17718	6.14316	2.28654	0.0676849
	92	0.803887	0.691654	0.947321	1.20163	0.772742	0.812851	0.905925	0.908799	1.02307	1.05155	1.39933	0.694781	2.25466	1.35457	0.0171934	1.38976	16.045	16.9146	0.0547209
	93	0.830459	0.698807	0.947353	1.16464	0.753342	0.82996	0.892308	0.923671	1.07597	1.06929	0.141129	0.777899	2.55921	1.71503	0.011494	1.30131	12.5828	6.08705	0.0242692
	94	0.811647	0.66087	0.941427	1.16285	0.708351	0.817124	0.749047	0.950938	1.24611	1.01952	2.04943	1.29392	2.55603	1.62633	0.00724499	1.82653	4.1362	2.8528	0.0974209
	95	0.802546	0.683976	0.940826	1.18723	0.752386	0.841575	0.878685	0.932678	1.10092	1.03002	-0.581764	0.864708	2.39389	0.702013	0.00484083	3.43724	6.74062	8.2214	0.0316976
	96	0.803911	0.702523	0.936863	1.17843	0.770503	0.808998	0.884145	0.900356	0.940894	1.13475	1.56015	0.677239	1.58185	0.704982	0.00481482	1.62158	7.47869	10.9729	0.0663627
	97	0.811416	0.66927	0.939511	1.16216	0.718168	0.812782	0.78358	0.940436	1.20806	1.04905	1.5979	1.10202	1.99464	0.861292	0.00680458	2.58615	9.94677	10.6666	0.0400459
	98	0.804132	0.678194	0.926399	1.13414	0.716893	0.816702	0.77703	0.94377	1.21576	1.05702	-3.55308	1.08629	2.57309	0.945293	0.00494984	3.61943	2.38499	16.7064	0.0817589
	99	0.863436	0.787952	0.940734	1.09176	0.818254	0.818237	0.862785	0.924336	1.11447	1.14024	-0.318669	0.8637	2.88996	0.869513	0.00847556	1.87979	11.3838	12.9033	0.0584488
	100	0.826424	0.712416	0.933925	1.13	0.752132	0.801437	0.898337	0.904729	1.03548	1.17505	-0.0456281	0.659894	2.03399	1.37474	0.00720009	2.63456	16.8854	3.98488	0.0926721
	101	0.850505	0.779939	0.930545	1.06341	0.801047	0.804185	0.892354	0.908976	1.05747	1.23143	1.54311	0.705099	2.90925	1.22246	0.00641062	1.56167	3.42672	12.4469	0.046541
	102	0.827169	0.675428	0.939605	1.12013	0.704589	0.817931	0.817983	0.934516	1.16983	1.09314	0.00695544	0.921994	2.80347	1.58058	0.00354441	2.87336	10.5901	1.93466	0.0591547
	103	0.812725	0.65323	0.938974	1.14126	0.68924	0.803237	0.753672	0.943861	1.23985	1.06235	2.9934	1.07811	2.62905	2.20938	0.0065843	1.82793	18.804	1.84571	0.089784
	104	0.836779	0.755254	0.939712	1.14175	0.80981	0.806093	0.842373	0.923096	1.13759	1.08664	1.13872	0.921019	2.27599	0.651767	0.00795232	2.88003	9.67445	9.75957	0.0757236
	105	0.801707	0.650361	0.950745	1.2038	0.720203	0.852584	0.803547	0.953408	1.19085	0.968323	-1.13696	1.44878	2.35891	0.893709	0.0085992	1.62346	19.656	4.16705	0.0653327
	106	0.809369	0.688119	0.925425	1.12143	0.722576	0.814637	0.843544	0.926999	1.13838	1.1206	-3.43321	0.861281	2.16504	0.826075	0.00541279	3.73936	18.756	17.3937	0.0447226
	107	0.816221	0.692609	0.946492	1.18373	0.759442	0.862342	0.874244	0.943828	1.11251	0.998888	-2.66323	1.06766	2.99266	0.487786	0.00415544	2.70164	16.4187	17.5444	0.0311256
	108	0.823838	0.774638	0.913751	1.03965	0.795606	0.81099	0.905874	0.906835	1.01342	1.26749	0.711336	0.698872	2.88713	1.03813	0.00246598	1.37795	5.29444	14.5755	0.0472912
	109	0.836113	0.755821	0.935893	1.13053	0.803847	0.808955	0.855192	0.921434	1.12164	1.11625	3.14929	0.796856	2.73306	0.906821	0.00651059	2.99955	7.33278	7.51613	0.071358
	110	0.845359	0.722231	0.937578	1.04866	0.733746	0.803417	0.811985	0.929215	1.17418	1.19707	-0.825734	0.975394	2.39348	1.03479	0.00474254	1.55353	18.2252	17.9343	0.0450226
	111	0.804861	0.656283	0.93972	1.16876	0.706693	0.811957	0.870145	0.919366	1.10179	1.10116	2.60076	0.86954	1.57761	0.701788	0.00242113	2.83207	16.8393	8.63856	0.0136578
	112	0.864475	0.814382	0.940341	1.09258	0.85059	0.822488	0.83321	0.933142	1.1528	1.09387	-3.56495	1.1423	2.69688	0.64963	0.0126297	1.48451	9.14128	14.0218	0.0740299
	113	0.804573	0.67852	0.92373	1.11863	0.711107	0.811087	0.895864	0.911992	1.05567	1.15808	-2.48222	0.737022	2.01346	0.866914	0.00210606	3.60246	8.22008	14.0976	0.0190443
	114	0.806132	0.700214	0.93417	1.16761	0.760325	0.811386	0.772676	0.94253	1.21994	1.01237	-2.38985	1.32471	2.08085	0.774593	0.0146093	2.71797	1.02886	10.9326	0.0488413
	115	0.826462	0.698794	0.942952	1.15787	0.749907	0.817635	0.772506	0.945292	1.22082	1.01339	-2.64596	1.62423	1.66651	0.712808	0.0132752	1.97492	13.269	1.12511	0.0971246
	116	0.850812	0.75713	0.935412	1.0852	0.781929	0.82684	0.840553	0.933561	1.14495	1.11908	-0.310522	0.985678	2.96214	1.01916	0.0028454	2.47216	14.2416	4.15461	0.00320048
	117	0.809156	0.715882	0.93093	1.15648	0.773139	0.806177	0.806533	0.93183	1.18106	1.04434	-2.11344	0.974336	2.59424	1.42123	0.0147558	2.63896	14.943	6.81473	0.0336209
	118	0.8488	0.730371	0.942157	1.11572	0.763435	0.803308	0.784671	0.935961	1.20559	1.09046	-0.816463	1.1376	2.09938	1.17216	0.00886855	1.94617	9.22159	4.4254	0.0886888
	119	0.816564	0.6845	0.946883	1.18223	0.747984	0.813833	0.818874	0.932398	1.16804	1.03744	2.58544	1.19655	1.54628	0.628948	0.00513011	2.28202	18.9914	2.31823	0.0578048
	120	0.816026	0.712587	0.951333	1.19707	0.796523	0.837981	0.889173	0.928645	1.0848	1.00395	-0.835562	0.960916	2.56638	1.06077	0.0144347	1.58547	15.1994	7.70805	0.0895902
	121	0.800093	0.632411	0.938353	1.15244	0.671241	0.804437	0.859814	0.918009	1.11371	1.13739	-0.922274	0.854189	1.49278	1.26262	0.00816786	2.13255	17.2795	15.9464	0.08376
	122	0.844276	0.719363	0.940423	1.11187	0.749613	0.827613	0.874834	0.926386	1.10123	1.13067	-2.19987	0.916755	2.02048	0.897126	0.00559467	2.02356	9.80133	8.2253	0.0206405
	123	0.80899	0.684788	0.939168	1.17296	0.743599	0.828116	0.850299	0.932025	1.13338	1.04427	-1.82702	0.964709	1.99483	0.735034	0.00913809	3.16166	2.90741	10.5452	0.0140849
	124	0.836008	0.731142	0.929934	1.08413	0.754444	0.807164	0.87197	0.916392	1.09696	1.17929	-2.91317	0.872412	2.04398	1.60867	0.00634581	2.28082	6.93347	1.65784	0.0572795
	125	0.83789	0.705548	0.94384	1.13879	0.746455	0.826674	0.867143	0.927611	1.1114	1.09483	-1.73904	1.01196	1.73201	0.958248	0.00504432	2.4171	3.52455	2.59993	0.0456769
	126	0.817393	0.69086	0.941811	1.16825	0.747269	0.83357	0.896412	0.924676	1.07111	1.05967	-2.31215	0.797878	2.43477	1.3444	0.0129663	1.82206	12.3693	13.2895	0.0248897
	127	0.832107	0.729597	0.93222	1.11596	0.765316	0.801402	0.822634	0.92564	1.16103	1.10873	3.31578	0.88567	2.81509	0.923925	0.00186956	3.58483	7.7388	4.40409	0.0122322
	128	0.816179	0.778596	0.909195	1.05519	0.805761	0.806115	0.90344	0.903589	1.00536	1.19103	-2.98068	0.871845	2.32738	1.13846	0.00143527	2.30309	14.4378	3.59701	0.00127542
	129	0.80777	0.658098	0.936196	1.14929	0.699102	0.839528	0.916381	0.922755	1.03202	1.10799	-2.51475	0.862691	1.69134	1.36982	0.00395848	1.56761	7.4339	2.46064	0.0211548
	130	0.832815	0.746704	0.940109	1.14875	0.803928	0.806033	0.829575	0.926158	1.1536	1.08034	3.17861	0.913846	2.46483	0.688172	0.00995249	2.21592	6.33268	18.5563	0.0992096
	131	0.811928	0.655127	0.937457	1.13852	0.690424	0.823911	0.799817	0.941492	1.19144	1.06615	-1.27762	0.979115	2.63674	1.23477	0.00415104	3.06462	4.0975	11.5322	0.0553492
	132	0.833442	0.721775	0.929425	1.07501	0.74154	0.809946	0.844798	0.92441	1.13555	1.16105	-1.33706	0.840675	2.87016	1.37107	0.00294525	3.27658	14.8696	1.61411	0.023733
	133	0.859158	0.764185	0.939131	1.08083	0.786996	0.801124	0.822155	0.925629	1.16155	1.14287	-3.39341	1.26635	1.59995	0.685349	0.0121305	1.71258	18.198	10.2999	0.00192285
	134	0.82502	0.772257	0.935561	1.14706	0.838484	0.805477	0.855375	0.919636	1.12024	1.05692	-3.0371	0.931295	2.69492	1.10154	0.0178518	2.35738	8.95769	9.78954	0.0766363
	135	0.808086	0.663867	0.941251	1.17187	0.717169	0.823835	0.738789	0.956336	1.25754	0.986473	-2.12193	1.65459	2.41365	0.793189	0.0065928	2.51516	10.926	2.39673	0.0275251
	136	0.817103	0.682632	0.942126	1.16649	0.736077	0.829405	0.812671	0.941005	1.1778	1.02386	-3.64367	1.31775	1.68543	0.638087	0.00831668	2.58293	3.13088	5.39049	0.0196989
	137	0.838875	0.746708	0.932337	1.10532	0.779804	0.844727	0.90128	0.92964	1.06925	1.11981	-3.51418	0.842279	2.87546	1.15296	0.00713413	1.48986	12.5638	12.8968	0.0822173
	138	0.813959	0.682422	0.935174	1.14844	0.726837	0.829427	0.83768	0.935426	1.14892	1.0738	1.16746	0.836003	2.95383	0.831815	0.00700837	3.42407	12.7649	18.8172	0.0128078
	139	0.82135	0.691368	0.945186	1.17164	0.749424	0.853085	0.842776	0.945469	1.14746	1.01432	-2.13796	1.07011	2.90622	0.894134	0.00951506	2.11312	6.48712	17.8888	0.0620876
	140	0.831151	0.726483	0.926668	1.06582	0.74485	0.802158	0.889222	0.90879	1.06287	1.24917	1.56493	0.733823	2.25256	1.06365	0.00344887	1.92676	6.21231	12.5559	0.0137252
	141	0.825435	0.707041	0.92735	1.07807	0.72714	0.809334	0.876904	0.916296	1.09026	1.19149	2.24595	0.741543	2.86207	1.40149	0.00222011	2.28938	14.519	5.03251	0.00946737
	142	0.801331	0.691696	0.947868	1.20571	0.776355	0.865705	0.91924	0.937351	1.05096	0.984365	-3.30651	1.14413	1.99517	0.636668	0.00646131	1.8483	8.17921	2.06692	0.0127511
	143	0.812446	0.688449	0.927938	1.1247	0.723737	0.802854	0.881889	0.911397	1.0781	1.17425	-0.353185	0.71167	1.92547	1.02723	0.0044768	3.62706	6.72231	7.96821	0.0314623
	144	0.832544	0.773321	0.945392	1.1611	0.850171	0.819424	0.899661	0.9158	1.05457	1.05336	-1.48647	0.958389	2.11032	0.724103	0.014432	1.89398	1.05828	4.79667	0.00678978
	145	0.860932	0.774569	0.940885	1.0951	0.804345	0.802958	0.824581	0.925902	1.159	1.12618	0.288476	1.01972	2.28374	0.491951	0.00208964	2.24126	14.6581	17.1067	0.0816737
	146	0.84164	0.706212	0.944796	1.1332	0.744029	0.836503	0.813965	0.943945	1.17739	1.05203	-1.76366	1.13195	2.6915	2.06064	0.00894415	1.44606	2.60732	1.29628	0.0893745
	147	0.804397	0.675251	0.931615	1.15298	0.721821	0.803382	0.782725	0.936483	1.20778	1.0672	1.92619	0.945678	2.41502	1.4447	0.00856412	2.79549	6.88343	7.56545	0.0401523
	148	0.828615	0.710872	0.939458	1.14618	0.758009	0.811452	0.784292	0.939671	1.2071	1.05128	1.52375	1.1335	2.30014	0.842864	0.00413566	3.06253	5.37311	3.00702	0.0136187
	149	0.804485	0.677724	0.936068	1.16907	0.733183	0.822748	0.721512	0.960312	1.27565	0.975241	-3.36377	2.06212	2.72181	0.723467	0.0131471	1.83548	12.8526	6.16663	0.0880568
	150	0.806071	0.655373	0.946972	1.18872	0.716554	0.859859	0.871777	0.943079	1.1149	1.0052	-3.66783	1.11652	2.03937	0.85466	0.0060186	2.011	8.71402	8.4434	0.0418099
	151	0.810343	0.714821	0.938582	1.1751	0.783451	0.809959	0.873625	0.917457	1.09569	1.06877	1.98837	0.846174	1.96667	0.491034	0.00261572	3.37002	17.3814	9.004	0.052072
	152	0.802285	0.735081	0.948542	1.20257	0.837219	0.830771	0.89097	0.924418	1.07858	0.992304	-0.225836	1.00775	2.61224	0.699523	0.0160572	2.25853	2.222	5.24879	0.0112154
	153	0.801985	0.712341	0.943928	1.19694	0.797964	0.81561	0.844571	0.927233	1.13734	1.01222	0.772339	1.06015	1.9527	0.458729	0.0080275	3.1091	15.9801	6.40193	0.0988589
	154	0.82886	0.700797	0.939052	1.13871	0.741995	0.805379	0.758088	0.943632	1.23525	1.04887	-2.11496	1.32401	1.92347	0.598817	0.00824489	2.4817	14.2385	13.1602	0.0852774
	155	0.806101	0.677392	0.947235	1.19668	0.749781	0.821981	0.871259	0.924295	1.10413	0.981712	-0.961195	1.19336	2.21044	0.65524	0.00101187	3.08474	1.40029	3.05099	0.0447558
	156	0.8166	0.679859	0.943195	1.16962	0.734499	0.812403	0.804586	0.935152	1.18434	1.05073	2.88633	1.18087	1.63391	0.985026	0.0070221	2.18696	6.95662	1.62541	0.0778579
	157	0.805887	0.72627	0.932318	1.16616	0.79327	0.82981	0.881557	0.926033	1.09251	1.04017	-3.17239	0.852423	2.87287	1.67872	0.0115067	3.06702	1.68306	1.36381	0.0526116
	158	0.832379	0.737682	0.946373	1.16602	0.804109	0.824309	0.786818	0.94474	1.2059	1.00762	1.82272	1.38788	2.63978	0.912486	0.0111592	1.66265	14.9277	1.59747	0.0767522
	159	0.837578	0.728364	0.942428	1.1444	0.777245	0.807612	0.85946	0.919724	1.11536	1.09895	1.13138	0.911592	1.933	1.41148	0.010095	1.81444	2.30958	2.46343	0.0235136
	160	0.858458	0.816507	0.947502	1.1277	0.879144	0.80944	0.806522	0.933328	1.18163	1.05826	3.253	1.21881	2.92052	0.420957	0.0105344	1.52965	12.0562	11.1754	0.0627874
	161	0.81542	0.743923	0.948326	1.18904	0.83517	0.826193	0.844419	0.932393	1.14012	0.997826	2.10322	1.17051	2.70052	0.524425	0.0169773	1.9818	6.83327	7.90685	0.00957042
	162	0.805099	0.649346	0.948724	1.19247	0.711409	0.870092	0.845936	0.95274	1.14664	0.98119	-3.07825	1.23698	2.87274	0.700255	0.00638902	2.03532	19.9998	19.1395	0.0375492
	163	0.831282	0.701884	0.940712	1.1402	0.743677	0.819079	0.787712	0.942216	1.20427	1.03951	-1.42039	1.17297	2.7236	1.00656	0.00348299	3.31203	6.3852	2.02011	0.0836271
	164	0.844668	0.698345	0.94673	1.12601	0.731149	0.834384	0.821437	0.941319	1.16865	1.07481	0.40923	1.04134	2.66257	0.924449	0.00367574	1.82946	6.67389	13.951	0.0355768
	165	0.841055	0.7723	0.931708	1.10605	0.810431	0.816388	0.908587	0.909269	1.01115	1.17306	-0.0374783	0.710437	2.39917	0.768464	0.00714077	2.11203	2.34786	11.2072	0.00610724
	166	0.802468	0.621373	0.939198	1.12128	0.646514	0.803238	0.811493	0.929249	1.17473	1.08577	1.92408	0.952521	2.82224	1.36923	0.00164943	2.46089	3.13003	17.9091	0.0106772
	167	0.802621	0.628249	0.937148	1.12478	0.655504	0.82134	0.854321	0.927818	1.12654	1.10458	-3.34328	1.10596	1.60393	1.65516	0.00356709	1.43011	11.0234	1.61124	0.033718
	168	0.812377	0.729404	0.93889	1.17368	0.801699	0.805113	0.745231	0.94685	1.24916	0.992252	1.66577	1.5283	2.93818	0.828369	0.0186411	1.67394	6.89315	12.5955	0.0629632
	169	0.84139	0.76835	0.926444	1.06515	0.790223	0.805311	0.868792	0.916215	1.10097	1.2079	0.436313	0.74768	2.97455	1.01985	0.00377322	2.8752	1.31953	12.9569	0.0854564
	170	0.812577	0.675536	0.946888	1.18577	0.739335	0.815197	0.906707	0.906972	0.992979	1.10026	-0.0141244	0.731919	1.61455	0.980148	0.0112641	1.29099	11.2995	15.6498	0.0469946
	171	0.876485	0.845045	0.942989	1.07457	0.87671	0.806938	0.841781	0.923654	1.13858	1.13965	-0.627206	1.07623	2.37489	0.566679	0.00629504	1.88142	1.09023	6.54355	0.057384
	172	0.808204	0.73578	0.94765	1.19571	0.83039	0.833935	0.871158	0.930401	1.10843	0.989741	-0.702713	1.09089	2.7841	0.89852	0.0141592	2.42446	13.3465	1.23635	0.0964554
	173	0.84304	0.762491	0.941823	1.13827	0.815861	0.810064	0.834992	0.926798	1.14788	1.06458	-2.41451	1.06732	2.20945	0.829037	0.0149065	1.91822	6.72753	11.9367	0.0966505
	174	0.836682	0.7606	0.935692	1.12937	0.809106	0.817475	0.906168	0.912192	1.03308	1.11853	-2.02885	0.745704	2.52413	0.849493	0.0112876	2.27427	2.38215	12.9734	0.0122557
	175	0.800931	0.679992	0.944527	1.19765	0.754513	0.842071	0.843213	0.940213	1.14494	0.991028	-2.19021	1.15036	2.21866	0.564827	0.0117891	2.78901	3.32091	13.5674	0.0185154
	176	0.816418	0.699421	0.945385	1.18189	0.767018	0.826331	0.851031	0.931	1.13203	1.01913	-1.61078	1.06521	2.07062	1.686	0.0146291	1.29736	6.22502	2.79704	0.0326964
	177	0.820006	0.687098	0.942981	1.16563	0.740728	0.829976	0.835251	0.936225	1.1519	1.03843	-0.803764	0.976428	2.48115	2.13946	0.0115374	1.41058	6.06204	3.36509	0.0114927
	178	0.830353	0.680938	0.937579	1.07345	0.695847	0.806325	0.827151	0.926885	1.15662	1.16206	0.18129	0.937367	2.49777	1.26413	0.00222958	1.37667	11.1441	18.183	0.0886728
	179	0.857617	0.739155	0.94661	1.11756	0.773351	0.828897	0.828246	0.937268	1.15989	1.09029	0.98217	1.04281	2.49212	0.940153	0.00495992	1.70711	8.26487	6.06307	0.0408813
	180	0.825027	0.70033	0.932432	1.11694	0.732492	0.81025	0.905584	0.906065	1.00952	1.2011	0.143545	0.709341	1.79972	0.779576	0.00606825	2.00865	11.8034	17.0472	0.00609513
	181	0.835608	0.704484	0.943125	1.14096	0.746571	0.828164	0.809588	0.941148	1.18109	1.06184	2.42482	1.00387	2.94396	2.01113	0.0091466	1.54084	11.5493	3.42963	0.00417943
	182	0.818049	0.740158	0.948441	1.18724	0.827367	0.834969	0.822559	0.941336	1.16746	0.986513	1.31064	1.34728	2.78801	0.479341	0.00832513	2.3301	5.89218	3.54012	0.0184862
	183	0.811238	0.707465	0.943863	1.18607	0.781358	0.824966	0.90985	0.911219	0.98435	1.07324	2.66205	0.614778	2.9825	1.15238	0.013527	1.48617	10.8047	16.8649	0.0258313
	184	0.821697	0.724262	0.930831	1.13436	0.769361	0.837208	0.911392	0.922931	1.04372	1.09836	-3.6243	0.819909	2.36009	0.705215	0.00259527	2.30963	6.47444	18.9119	0.0835565
	185	0.856151	0.743144	0.944281	1.11228	0.775807	0.818506	0.850299	0.927332	1.13088	1.12517	1.39565	0.994641	2.00874	0.75674	0.00480829	1.66128	5.06083	8.25991	0.0189273
	186	0.858537	0.805546	0.941395	1.1099	0.850668	0.81845	0.844223	0.928696	1.1385	1.09231	-1.44261	0.988153	2.87718	0.501414	0.00760303	2.6355	19.8536	9.51226	0.0573525
	187	0.803279	0.761291	0.941804	1.18431	0.859904	0.807255	0.841428	0.923894	1.13911	1.01405	2.7373	1.01101	2.96541	0.531928	0.0131794	2.99237	5.85536	7.5474	0.0643369
	188	0.836508	0.704147	0.936033	1.08998	0.725518	0.806998	0.788753	0.936588	1.2015	1.12998	0.285269	0.9343	2.95581	1.31669	0.00615833	2.48396	2.35466	15.5893	0.0276811
	189	0.80296	0.655886	0.941571	1.17848	0.711649	0.833099	0.818115	0.941466	1.17221	1.02265	0.763186	1.00557	2.50785	1.14934	0.00456647	3.31923	16.8822	1.51181	0.0372091
	190	0.802569	0.630306	0.943194	1.16421	0.673686	0.802333	0.76361	0.940896	1.22888	1.04735	0.861434	1.39759	1.38461	0.499894	0.00566272	1.96705	15.992	18.7869	0.0341018
	191	0.823853	0.714738	0.9376	1.15076	0.766011	0.813092	0.870945	0.919768	1.10108	1.09543	1.04461	0.711841	2.91033	1.40813	0.0104743	2.57702	9.24931	10.6886	0.0562452
	192	0.801229	0.603053	0.946003	1.1256	0.62734	0.802104	0.815727	0.927679	1.16949	1.1183	0.165748	1.11571	1.50847	1.21978	0.00265358	1.17344	10.2668	9.29756	0.0155633
	193	0.805426	0.649133	0.941787	1.16962	0.698422	0.828916	0.901947	0.920695	1.05766	1.07403	-3.57698	1.01724	1.41593	0.886814	0.00275091	1.98272	2.40021	8.36178	0.0787227
	194	0.800456	0.692597	0.933969	1.17435	0.755584	0.828822	0.796921	0.944363	1.19531	1.00135	-2.66613	1.18166	2.93575	1.1334	0.0168908	2.47334	8.0572	14.9087	0.0210947
	195	0.820573	0.69536	0.937826	1.15062	0.742603	0.814415	0.746122	0.950541	1.24901	1.02092	-1.60912	1.36551	2.46607	0.999986	0.00916969	2.38753	15.2994	5.0184	0.0783974
	196	0.806866	0.652841	0.937902	1.15405	0.695153	0.827209	0.82817	0.936494	1.15966	1.0718	3.36626	0.83588	2.95132	1.16914	0.00333994	3.06357	5.47504	11.1067	0.016464

## Sheet: LowerMRB
COMPROMISE SOLUTIONS
		Metrics regarding Q					Metrics regarding TWSA				Parameter values (names and units based on Table 2; values of non-disturbed parameters are included in Table 2)
		NSE	KGE	CC	RBias	RVar	NSE	KGE	CC	RVar	EP-PTh	SN-MT	SL-MSM	SL-RC	GW-RFM	SW-RRM	SW-LD	SW-WD	SW-DC	NA-GM
EnCDA		0.82605	0.76263	0.91916	1.0358	0.77972	0.87833	0.92997	0.94229	1.0397	1.29966	1.26524	0.56445	2.93417	0.324558	4.40787	1	14.4663	0.0372289	-1.96622
POC		0.872228	0.803706	0.94633	1.0593	0.820739	0.912409	0.955941	0.956548	1.00729	1.64934	-0.909784	0.500107	0.32653	2.99822	2.59958	19.6838	4.33667	0.00472023	0.721141
GLUE		0.836769	0.766382	0.930973	1.06573	0.786712	0.891733	0.912992	0.944477	0.933011	1.5652	-1.49934	0.659499	0.378029	1.57065	1.62401	3.71992	7.79128	0.0079258	0.43759
BEHAVIORAL SOLUTIONS (all behavioral solutions for each methodology)
		Metrics regarding Q					Metrics regarding TWSA				Parameter values (names and units based on Table 2; values of non-disturbed parameters are included in Table 2)
	Sl. No.	NSE	KGE	CC	RBias	RVar	NSE	KGE	CC	RVar	EP-PTh	SN-MT	SL-MSM	SL-RC	GW-RFM	SW-RRM	SW-LD	SW-WD	SW-DC	NA-GM
EnCDA	1	0.81362	0.69431	0.92655	1.0393	0.70588	0.88267	0.9411	0.94203	1.0104	1.15437	-0.256947	0.607966	2.88994	0.3	3.66955	1.12488	14.3976	0.0374589	-1.82013
	2	0.82605	0.76263	0.91916	1.0358	0.77972	0.87833	0.92997	0.94229	1.0397	1.29966	1.26524	0.56445	2.93417	0.324558	4.40787	1	14.4663	0.0372289	-1.96622
	3	0.8188	0.75449	0.93	1.09	0.78256	0.88923	0.93843	0.94678	1.031	1.43324	3.10222	0.504534	2.99715	0.332158	4.8989	1	14.1345	0.0449678	-1.95166
	4	0.80184	0.70787	0.92494	1.0857	0.731	0.8538	0.91014	0.9328	1.0597	1.39845	2.82644	0.736061	2.72736	0.316307	4.92331	4.41426	15.3004	0.0384862	-1.73095
	5	0.81254	0.73334	0.92804	1.0877	0.75867	0.89406	0.86977	0.94795	0.88063	1.32419	1.61756	0.607846	2.8841	0.36449	4.6662	1	13.7964	0.0436292	-1.79515
	6	0.80115	0.72935	0.90825	1.0176	0.74599	0.89831	0.93772	0.95188	1.0395	1.4648	3.51673	0.507594	2.99257	0.325625	4.92943	1	15.6704	0.029977	-1.96786
POC	1	0.856641	0.813604	0.939428	1.06971	0.838091	0.927519	0.916321	0.969183	1.0778	0.915928	-3.73967	0.5	2.94801	2.46586	1.59298	19.6044	8.72284	0.00436033	0.573483
	2	0.860437	0.81683	0.939919	1.06504	0.839651	0.921956	0.904875	0.967863	1.08953	0.94763	-0.957811	0.5	2.97988	2.48663	1.58987	19.1001	8.66151	0.00434625	0.579148
	3	0.885102	0.820982	0.947594	1.03057	0.831577	0.843023	0.858088	0.937588	1.12745	1.64933	-0.965755	2.79818	0.387652	2.98915	1.98288	3.38934	3.09002	0.0204576	0.723107
	4	0.85212	0.817724	0.937056	1.07091	0.844326	0.932577	0.940925	0.969112	1.05036	0.907171	-3.74007	0.5	2.80441	2.62508	1.58259	19.548	8.73545	0.002417	0.568932
	5	0.872228	0.803706	0.94633	1.0593	0.820739	0.912409	0.955941	0.956548	1.00729	1.64934	-0.909784	0.500107	0.32653	2.99822	2.59958	19.6838	4.33667	0.00472023	0.721141
	6	0.875484	0.816368	0.944419	1.04716	0.831456	0.907682	0.949987	0.955069	1.02197	1.65	-0.921685	0.500303	0.414361	2.99822	2.45812	19.686	4.00242	0.00475121	0.724691
	7	0.880198	0.829867	0.943965	1.03359	0.842909	0.888488	0.916696	0.949791	1.06647	1.65	-0.966078	0.500014	0.585501	2.99823	2.47229	12.8573	3.96956	0.00876869	0.684567
GLUE	1	0.830505	0.772729	0.93611	1.09242	0.802443	0.821047	0.908711	0.913659	1.02965	1.10178	-0.383842	1.69219	0.373623	1.51051	2.52626	13.2057	1.59893	0.0151334	-0.0774661
	2	0.818512	0.741796	0.931498	1.09026	0.767987	0.82025	0.817763	0.935724	1.17053	1.07293	2.24399	0.839583	1.18227	2.69407	2.92384	9.2816	17.4656	0.0255553	-1.21317
	3	0.839453	0.773399	0.935177	1.07677	0.796893	0.848217	0.789501	0.954633	1.20555	0.975198	3.09524	0.885522	1.60871	0.623192	2.11427	15.4967	15.057	0.0168132	-0.0477475
	4	0.817872	0.739081	0.937304	1.10321	0.76871	0.80896	0.737247	0.950614	1.25807	0.889007	1.06279	1.12026	0.762236	1.25215	2.99319	18.3831	18.3688	0.070594	-0.196525
	5	0.836532	0.765102	0.933439	1.0739	0.787197	0.848137	0.724804	0.969803	1.27353	0.91551	1.94336	1.74214	2.85666	1.94918	1.07032	9.52944	16.8247	0.0146628	-0.915956
	6	0.823769	0.803272	0.924063	1.07731	0.835806	0.803132	0.846823	0.896328	0.887238	1.15033	-2.85502	0.856682	0.627638	1.95774	1.1689	19.29	2.63386	0.0456575	0.00399674
	7	0.803021	0.733816	0.934675	1.11414	0.768574	0.840791	0.91804	0.923064	1.02825	0.971964	0.585352	0.907812	0.847385	0.627362	2.30087	5.3093	13.3932	0.00956846	-1.73294
	8	0.840433	0.73783	0.93537	1.05235	0.751372	0.842369	0.789327	0.952193	1.20518	1.62709	2.67135	2.89882	0.311687	2.74535	2.54077	14.5448	9.6499	0.00657612	0.734921
	9	0.848406	0.769148	0.933856	1.0468	0.783834	0.832403	0.835476	0.93747	1.15218	1.58637	-1.84664	2.35784	0.423678	1.31651	2.95587	2.95623	5.01779	0.0022167	-0.16662
	10	0.832265	0.826521	0.921404	1.05772	0.856522	0.802497	0.875636	0.896578	0.930934	1.30157	3.28684	0.62123	0.93858	2.56115	1.65085	9.66284	2.29509	0.0357008	-0.0101619
	11	0.844428	0.782075	0.930353	1.0517	0.800081	0.810034	0.889805	0.913354	1.06808	1.49908	3.52943	0.976637	0.745639	0.852814	1.99649	14.9155	14.9543	0.0825469	-0.296543
	12	0.848121	0.84025	0.929404	1.05599	0.868086	0.812223	0.823254	0.930698	1.16259	1.00803	1.79638	0.851393	2.9917	1.66654	1.65962	18.2263	3.67779	0.0511626	0.64403
	13	0.82813	0.737494	0.933941	1.07882	0.758477	0.843988	0.920855	0.924057	1.02228	1.3982	0.425926	1.4642	0.422685	1.24418	2.02746	4.28076	12.2545	0.0113006	-0.758395
	14	0.838811	0.77559	0.929588	1.06016	0.795591	0.843744	0.895438	0.930449	1.07808	1.26645	1.71733	0.8496	0.936108	1.43276	1.72328	1.8165	19.1038	0.0474685	-0.148383
	15	0.836287	0.748505	0.934115	1.06845	0.767142	0.800356	0.861011	0.915824	1.1106	1.58475	-2.30586	0.964438	0.416437	0.49997	2.79129	15.114	18.8666	0.0661854	0.426682
	16	0.826336	0.729014	0.931048	1.06764	0.746813	0.839539	0.873499	0.932841	1.1072	1.51652	-3.20398	1.28391	0.472065	1.59133	2.85202	10.0153	15.8734	0.0122967	-0.643213
	17	0.838202	0.755238	0.935544	1.07293	0.775422	0.825301	0.812829	0.939249	1.17704	1.23971	-2.19948	1.45763	0.406203	1.87883	2.75725	13.4583	7.38864	0.0352805	0.727153
	18	0.811719	0.736808	0.937884	1.1111	0.769633	0.815711	0.801947	0.937473	1.18792	0.895071	-2.86098	1.09793	0.357972	1.91355	3.18916	14.2312	10.1	0.0965663	0.954865
	19	0.84469	0.812918	0.923654	1.02669	0.831302	0.802198	0.893663	0.907412	1.0523	1.56016	2.87424	0.711665	1.5007	0.69199	1.75546	2.08176	15.0352	0.0584478	-0.204425
	20	0.830359	0.743	0.939048	1.09121	0.767591	0.829116	0.748854	0.956104	1.24728	0.917908	-3.18757	2.32717	0.475767	0.805562	2.66726	14.8708	7.25035	0.0033682	-0.0926686
	21	0.847537	0.818914	0.928408	1.05003	0.84137	0.823463	0.868382	0.92579	1.1087	1.20547	1.62036	0.598609	2.27544	1.61443	2.00994	17.9395	9.41833	0.0972527	0.275263
	22	0.80095	0.704881	0.93899	1.11628	0.735705	0.866628	0.868068	0.94713	1.12087	0.942482	-2.46067	1.85677	0.302502	2.34661	2.48663	15.7055	19.8215	0.0661228	0.0650523
	23	0.848767	0.779655	0.931947	1.04312	0.794912	0.828393	0.88668	0.924268	1.0843	1.55971	-2.30684	1.31748	0.561972	1.36571	1.90829	19.4596	6.35072	0.0186224	0.0231622
	24	0.836334	0.745159	0.932182	1.05776	0.761236	0.804062	0.770058	0.940116	1.22201	1.4776	-1.38111	1.63506	0.438907	1.4367	3.31624	6.5819	11.0663	0.0242738	0.290655
	25	0.83768	0.776455	0.932319	1.07242	0.799633	0.80067	0.87954	0.91099	1.08117	1.33692	1.71305	1.10901	0.53798	1.44285	2.88273	1.02533	4.58584	0.0178435	-0.464275
	26	0.837075	0.766986	0.930441	1.06335	0.786824	0.836961	0.764688	0.955516	1.23107	1.08091	3.33699	0.590158	2.96408	0.999174	2.98389	2.22539	19.8599	0.00780462	0.0318884
	27	0.847336	0.797535	0.927171	1.02902	0.81333	0.821475	0.79419	0.941798	1.19741	1.29508	2.89035	0.77747	2.40124	1.52545	1.68931	15.8033	16.0497	0.0222993	0.283336
	28	0.825103	0.735466	0.932379	1.07888	0.756722	0.824139	0.78643	0.944871	1.20633	1.30508	2.56918	1.20029	0.388577	2.15415	3.472	16.2906	12.8805	0.0481933	0.558504
	29	0.83169	0.762776	0.938206	1.09338	0.790867	0.86218	0.824131	0.953439	1.16959	0.89079	-0.136411	0.948812	1.02997	1.09178	1.9069	12.6658	18.5036	0.0593069	0.146096
	30	0.820261	0.746812	0.938472	1.10466	0.777818	0.868912	0.858542	0.949927	1.1323	0.89314	-2.35971	0.855982	0.642293	1.40911	2.27686	17.0573	18.5845	0.096128	0.319208
	31	0.832833	0.751358	0.929812	1.06216	0.769712	0.838138	0.915388	0.91773	0.98023	1.64629	-2.11124	0.744022	0.618182	1.34615	2.14566	11.0666	19.6392	0.0415729	-0.804015
	32	0.827227	0.73267	0.937044	1.08681	0.75512	0.829327	0.833725	0.936374	1.15362	1.13593	-3.18222	1.87774	0.449824	0.771707	2.38661	16.6615	16.3937	0.0491194	-0.299528
	33	0.827938	0.737501	0.929049	1.06196	0.754984	0.802206	0.788794	0.93454	1.20081	1.33573	1.41657	1.10632	0.786894	1.91105	2.90419	11.2674	18.569	0.00909829	-0.864375
	34	0.844069	0.809041	0.932363	1.06921	0.835378	0.831363	0.837433	0.936474	1.14964	1.03552	0.44631	0.678901	1.59168	1.00626	2.56754	1.07002	5.86236	0.0161639	0.327033
	35	0.8508	0.811692	0.928212	1.03428	0.82932	0.804517	0.785725	0.936324	1.2046	1.28569	-2.70202	0.70906	2.00466	1.76895	2.43582	2.69475	9.99831	0.0346846	0.435304
	36	0.820961	0.73282	0.934138	1.0896	0.757062	0.80619	0.802642	0.932911	1.18561	1.1263	1.1339	1.31067	0.595477	1.64865	2.88491	14.0945	17.1073	0.0510014	-0.715246
	37	0.834761	0.774927	0.937639	1.09067	0.803664	0.849051	0.807187	0.951098	1.18651	0.891517	-1.01966	1.01401	1.6287	0.956816	1.97763	6.28762	18.0779	0.0660803	-0.275847
	38	0.808324	0.735727	0.936579	1.11222	0.769295	0.883736	0.936802	0.940889	0.977643	0.99044	0.138234	0.804249	0.376509	1.80882	1.83478	1.57214	18.6303	0.0950977	0.354164
	39	0.839512	0.764068	0.92786	1.03764	0.778543	0.835378	0.877633	0.929868	1.10027	1.49386	1.25822	1.32322	0.651891	1.03769	1.33024	6.4477	17.3122	0.00681227	0.0461789
	40	0.849695	0.801723	0.934587	1.06433	0.824224	0.80381	0.728988	0.950697	1.26649	0.988577	-0.161324	1.11407	1.2559	1.05498	2.42576	7.91069	6.10153	0.00315604	0.45723
	41	0.840104	0.784321	0.93481	1.07774	0.809673	0.820687	0.906776	0.914301	1.03669	1.3101	0.455792	1.66568	0.343654	1.56476	2.93754	3.27122	1.71003	0.0573253	0.540956
	42	0.841057	0.839376	0.929125	1.06701	0.87238	0.821101	0.865443	0.925227	1.11187	0.955648	2.63216	1.13664	2.3764	1.26295	1.29085	5.62753	3.33861	0.0334057	-0.0654471
	43	0.827418	0.745093	0.933658	1.08282	0.768232	0.874875	0.877988	0.949339	1.111	1.17287	-3.30367	0.79896	0.477744	2.35492	2.51912	4.12923	19.0513	0.0614919	0.727919
	44	0.800525	0.706278	0.92613	1.09034	0.730454	0.817777	0.868094	0.922985	1.10709	1.51668	-1.92272	0.983357	0.419035	0.664255	4.21973	8.3748	17.6591	0.0147749	-1.35656
	45	0.803767	0.696144	0.932184	1.09453	0.719299	0.829313	0.891669	0.923606	1.07681	1.49128	3.02089	2.14113	0.33504	1.33618	3.20748	14.6733	15.5603	0.00701317	-1.63317
	46	0.828295	0.787169	0.933182	1.09106	0.819608	0.830615	0.910739	0.913714	0.977144	1.00167	3.02563	1.91364	0.435104	1.08754	1.93518	13.6924	2.00916	0.00276972	-0.22847
	47	0.825627	0.726031	0.936161	1.08387	0.747116	0.82265	0.759645	0.950715	1.23525	1.05853	2.66571	1.69294	0.539984	0.876781	2.41636	14.4109	18.8412	0.0129051	-0.236976
	48	0.822257	0.738481	0.937027	1.09664	0.765293	0.840666	0.798336	0.949396	1.19521	0.98987	-0.0428137	1.12116	0.46084	2.06471	2.95341	2.34965	11.2741	0.0202751	0.398129
	49	0.825685	0.765487	0.93063	1.0845	0.792532	0.851953	0.924986	0.925464	0.991545	1.10903	-2.20093	0.719223	0.941546	0.817356	1.51405	19.6624	18.1373	0.0582768	-0.565398
	50	0.827184	0.76491	0.929318	1.07847	0.789968	0.803317	0.824431	0.897244	0.857642	1.59295	3.24591	0.642596	0.511275	0.435798	1.80356	10.6745	10.4258	0.0305217	-1.10911
	51	0.844432	0.782015	0.928002	1.03578	0.797383	0.81773	0.858511	0.925192	1.1201	1.42498	-2.39168	1.15818	0.948598	2.12851	1.38822	14.1583	15.4593	0.0416774	-0.0896875
	52	0.84387	0.773923	0.933279	1.0616	0.792963	0.819386	0.910208	0.91076	1.00994	1.47666	3.54773	2.20001	0.416102	2.54748	1.55454	13.3685	4.11525	0.0332817	-0.298883
	53	0.823091	0.745113	0.931617	1.0846	0.76949	0.827604	0.890807	0.910266	0.937783	1.36319	-3.05031	1.24663	0.444913	2.00305	1.5368	17.0063	14.1607	0.0761277	-0.662712
	54	0.84763	0.793233	0.928071	1.03123	0.808679	0.810359	0.789172	0.938069	1.20153	1.29333	-1.90274	1.00532	1.66024	1.08867	1.67624	4.16826	16.5152	0.0135292	0.0277001
	55	0.822142	0.77504	0.933262	1.09715	0.808386	0.843576	0.916215	0.920176	0.974545	1.21904	2.53831	0.528794	0.368457	0.90067	3.39419	1.37747	2.58378	0.014493	0.328765
	56	0.836356	0.766795	0.936123	1.08249	0.791435	0.822513	0.73583	0.956589	1.26058	0.93447	-3.07849	1.59011	1.69802	1.81335	2.05067	8.8678	8.1518	0.00971642	-1.2434
	57	0.840282	0.774256	0.935171	1.07557	0.797402	0.817532	0.903879	0.906929	0.975979	1.56556	3.58957	1.62914	0.320853	1.23347	2.56434	19.5802	2.39472	0.0367091	-0.0797923
	58	0.841712	0.746782	0.936146	1.06139	0.76278	0.831532	0.826857	0.938957	1.16203	1.46444	-2.74057	2.46935	0.362345	1.97222	2.44392	4.69958	13.8549	0.0923265	0.792503
	59	0.829604	0.746876	0.939478	1.09468	0.773188	0.804229	0.793022	0.934469	1.19633	0.96039	2.42123	1.44267	0.443526	1.20736	2.11739	13.6543	15.189	0.0879689	0.729644
	60	0.816384	0.735178	0.934896	1.09888	0.763113	0.896707	0.922739	0.953212	1.06148	0.96046	-2.67065	0.870504	0.561712	1.13887	1.67705	9.55536	19.8958	0.0206954	0.205919
	61	0.814579	0.729984	0.938019	1.10614	0.759581	0.850642	0.872822	0.938486	1.11131	1.07248	2.78374	1.23974	0.323422	0.946768	3.00806	8.16161	10.3182	0.0322214	0.235279
	62	0.836923	0.7655	0.932287	1.06958	0.786544	0.827428	0.823397	0.937766	1.16527	1.22362	2.37463	0.755834	0.795257	0.481059	2.92027	5.14257	18.7243	0.0389135	0.099659
	63	0.846213	0.769036	0.931964	1.04313	0.783541	0.806063	0.770427	0.940893	1.22183	1.33925	3.56845	1.2896	0.743806	1.05332	2.0574	8.65771	14.0813	0.0133496	0.307552
	64	0.837551	0.751248	0.936162	1.07426	0.771336	0.820832	0.870733	0.924033	1.10459	1.34089	-0.324422	1.41362	0.401678	0.985071	2.1475	5.42923	17.1774	0.0894998	0.583721
	65	0.80011	0.722101	0.934275	1.1138	0.75514	0.828186	0.88745	0.910428	0.93185	1.13975	-2.93478	1.20375	0.379523	2.86251	1.93549	8.34441	15.127	0.0789581	-1.0083
	66	0.840504	0.77888	0.932178	1.06731	0.800592	0.803043	0.783558	0.936212	1.20683	1.1351	1.46016	0.820898	1.22136	1.45283	2.73124	14.5876	10.0484	0.0269111	-0.224508
	67	0.825829	0.760155	0.936811	1.09739	0.790123	0.825656	0.90776	0.917092	1.04043	0.991423	0.335732	1.88086	0.60123	0.988866	1.4171	4.62961	7.81758	0.0723154	-1.16351
	68	0.825152	0.775712	0.934723	1.09668	0.808435	0.803757	0.823901	0.926513	1.16003	0.959426	2.78706	1.12351	2.23887	0.753252	2.37484	17.8865	11.6047	0.0597798	-1.76891
	69	0.836333	0.768534	0.929647	1.06286	0.788636	0.811621	0.788722	0.938776	1.20221	1.32233	-3.44031	0.887657	0.560961	2.85768	3.53348	3.07339	7.49173	0.0356118	0.584408
	70	0.818745	0.750188	0.933402	1.09679	0.779541	0.816494	0.864396	0.903702	0.904527	1.39054	-2.29965	0.777159	0.399462	0.920591	2.39839	2.58248	11.0393	0.0845064	-0.606923
	71	0.839308	0.785863	0.939283	1.09043	0.815635	0.822807	0.796451	0.941854	1.19507	0.887104	1.42445	1.15282	0.8702	2.12515	2.0483	19.0835	6.03531	0.063288	0.322953
	72	0.835383	0.747251	0.932006	1.06154	0.764475	0.814351	0.815964	0.933444	1.17158	1.22704	3.68445	1.82641	0.750802	1.27085	1.51582	14.3507	16.9672	0.0165688	-0.945053
	73	0.810978	0.709239	0.937164	1.10153	0.734888	0.827116	0.764287	0.951466	1.23066	0.951795	0.723835	2.03195	0.473844	1.45449	2.66297	15.1603	14.0364	0.00932333	-0.708698
	74	0.823628	0.72845	0.937559	1.09206	0.75228	0.866424	0.927843	0.936014	1.03335	1.30393	2.45645	1.71941	0.312234	0.926269	2.07684	8.85006	17.9571	0.0512371	0.0834703
	75	0.828405	0.758852	0.929778	1.07552	0.782013	0.845677	0.886685	0.933262	1.09158	1.20096	2.25885	0.936329	0.886009	1.07782	2.48032	6.7974	11.5186	0.00260741	-1.14679
	76	0.822868	0.748654	0.936592	1.09791	0.777363	0.840318	0.919289	0.922174	1.02139	1.0469	-1.5911	1.70987	0.438542	1.69377	1.61232	11.3605	6.73171	0.0313749	-0.58781
	77	0.840374	0.81254	0.926042	1.05577	0.837024	0.812846	0.902244	0.904688	0.97828	1.32166	-0.450866	0.796198	0.831897	2.15105	1.40736	11.5376	5.84341	0.0898385	0.127964
	78	0.826045	0.72743	0.933789	1.07677	0.746985	0.890765	0.919859	0.950583	1.06309	1.57071	-0.71989	0.65497	0.348936	2.36098	2.77864	14.0073	16.6576	0.0148543	0.349701
	79	0.816137	0.728337	0.932817	1.09201	0.753382	0.837875	0.84789	0.937363	1.13862	1.178	-3.6581	1.1826	0.452442	0.68746	3.31957	6.03086	11.248	0.00624042	-0.575476
	80	0.839706	0.773444	0.932706	1.06861	0.794838	0.832196	0.888209	0.925923	1.08372	1.51847	2.78097	0.954767	0.412867	2.78881	3.1655	8.99206	5.90521	0.0914623	0.504649
	81	0.805006	0.727901	0.935532	1.11211	0.760596	0.817926	0.812084	0.936005	1.17668	0.955277	2.87728	1.16331	0.496485	1.74169	3.36402	4.73683	11.4343	0.0375777	-0.528875
	82	0.807923	0.743865	0.934481	1.11052	0.778419	0.83665	0.873754	0.931331	1.10594	1.00838	-3.28106	0.799192	0.365214	1.85322	3.62006	12.742	7.13835	0.0931812	0.5106
	83	0.83982	0.78864	0.932907	1.07388	0.813685	0.821102	0.816043	0.936519	1.17266	1.08185	-0.337497	0.683651	1.03353	1.65611	2.88948	3.81141	8.9253	0.0527389	0.371573
	84	0.838112	0.801682	0.934286	1.08247	0.832041	0.81057	0.807998	0.933546	1.18014	0.953011	-0.272985	0.819829	2.81419	1.04129	2.52636	12.5223	10.8107	0.0989664	-0.326921
	85	0.819198	0.73001	0.927176	1.0713	0.749986	0.836032	0.842072	0.9377	1.14512	1.4767	-3.72796	0.743498	0.528108	1.73368	3.75103	19.7913	12.6124	0.0117545	-0.513665
	86	0.809434	0.736861	0.933434	1.10518	0.768163	0.809895	0.822112	0.929875	1.16348	0.987982	-0.783741	0.975345	1.05789	1.68991	3.09702	2.66666	17.4056	0.0465415	-1.50766
	87	0.805193	0.709719	0.930339	1.09477	0.734617	0.871094	0.881965	0.946798	1.10537	1.30724	-2.30619	0.568933	0.41324	2.11029	3.62909	7.22905	19.6787	0.0105797	-0.228228
	88	0.839277	0.77071	0.934502	1.07416	0.793156	0.835854	0.877492	0.930136	1.10063	1.09013	1.88882	1.57395	0.634315	1.34043	1.23917	15.8652	8.90384	0.04005	-0.186006
	89	0.812034	0.720142	0.938409	1.10695	0.748826	0.837177	0.900009	0.925946	1.06719	1.14885	-2.37307	2.17456	0.305093	1.20203	2.72509	13.1207	12.5713	0.089568	-0.391203
	90	0.842121	0.803795	0.93308	1.07365	0.830905	0.832187	0.820446	0.94063	1.16945	0.975356	1.70384	0.641439	1.88399	1.69281	2.28447	9.87711	9.37267	0.0787499	0.735697
	91	0.824985	0.725123	0.936182	1.0846	0.746371	0.811103	0.721072	0.955793	1.2754	1.03082	-1.45696	1.63666	0.450099	1.98516	2.78151	18.8688	15.9557	0.0235181	0.525123
	92	0.816714	0.788364	0.930441	1.09902	0.826376	0.869939	0.933202	0.936609	1.02106	0.897821	-3.46984	0.640116	1.72363	1.7841	2.57607	6.24454	4.15978	0.00441511	-0.529795
	93	0.830336	0.84618	0.924758	1.07011	0.885613	0.806786	0.900182	0.907684	1.03797	0.98038	0.251417	0.922236	1.94476	2.16119	1.8344	2.1981	1.48804	0.0417546	0.074127
	94	0.816078	0.719895	0.934373	1.09225	0.743792	0.837007	0.815524	0.943933	1.17575	1.1742	-1.48069	1.33441	0.378466	1.59308	3.16368	12.9434	18.9723	0.0461523	0.206669
	95	0.827801	0.735211	0.930279	1.06562	0.753128	0.817565	0.884757	0.918917	1.08189	1.62003	-3.03716	1.47553	0.473559	2.64524	2.96335	9.98096	9.55125	0.0105293	-1.22164
	96	0.843962	0.811311	0.932208	1.06929	0.838115	0.836379	0.834892	0.939356	1.15357	0.984076	2.25485	0.981555	2.24671	2.32307	1.56724	1.62768	9.96028	0.067165	-0.0562434
	97	0.839615	0.769869	0.930895	1.06044	0.788973	0.821676	0.712382	0.962314	1.28514	1.05547	1.95544	0.711165	2.27801	2.24941	2.91634	19.9207	13.0645	0.00401001	0.209816
	98	0.836777	0.755628	0.936796	1.07966	0.77779	0.861832	0.922917	0.934539	1.0407	1.27214	2.42256	1.75124	0.332118	1.60161	1.72266	18.5211	7.50977	0.0463319	0.609203
	99	0.826465	0.775649	0.938748	1.10331	0.810504	0.810471	0.856486	0.922016	1.12048	0.927657	1.62487	1.46345	0.414646	1.41307	3.00052	9.59596	2.05145	0.0583527	0.347469
	100	0.824004	0.750501	0.934365	1.09184	0.777499	0.820407	0.840108	0.930694	1.14409	1.08132	-0.662811	0.975648	0.694524	2.11743	2.73884	12.689	14.9097	0.0847392	-0.484298
	101	0.833348	0.755109	0.927769	1.05414	0.772353	0.843069	0.914088	0.925782	1.04327	1.49124	-3.00296	0.831461	0.777621	1.43892	2.0382	4.19211	18.3749	0.011633	-0.757419
	102	0.845435	0.777468	0.931599	1.05179	0.794672	0.812926	0.830139	0.929439	1.15451	1.23728	2.58536	1.60237	0.804768	1.53438	1.30754	12.7765	9.2043	0.0204242	-0.379541
	103	0.835223	0.768553	0.930675	1.069	0.790235	0.851428	0.837259	0.945869	1.15347	1.10338	0.349975	0.641081	2.42827	2.49772	2.43684	6.44327	15.2464	0.0138857	-0.575127
	104	0.848319	0.820295	0.925241	1.02756	0.838925	0.822939	0.871759	0.92478	1.10386	1.45718	3.63801	0.661944	1.505	2.1509	1.85559	3.13994	11.2895	0.0944558	0.507312
	105	0.844451	0.773948	0.930192	1.04406	0.789559	0.807949	0.849018	0.922543	1.1296	1.44367	-1.85037	1.15016	0.843607	1.1667	1.862	18.1995	18.2937	0.0593044	-0.245253
	106	0.816449	0.733357	0.934197	1.09664	0.760356	0.854268	0.912863	0.932475	1.05508	1.2645	1.66415	0.835411	0.400864	2.43649	2.83891	17.0951	16.2882	0.0893304	-0.0704978
	107	0.817315	0.723463	0.937669	1.09958	0.749657	0.807523	0.699992	0.959938	1.29732	0.886187	3.08358	2.02304	0.845017	1.42642	2.58242	2.44215	12.1105	0.00746156	-1.36113
	108	0.8421	0.806266	0.933586	1.07546	0.834385	0.82008	0.842873	0.929874	1.14061	1.01058	-0.471284	0.769537	1.33522	1.78434	2.28652	17.2602	4.30931	0.0307969	0.162897
	109	0.841631	0.803267	0.928513	1.05996	0.826801	0.823415	0.839354	0.932281	1.14568	1.1491	0.235966	0.713395	2.43331	1.43133	2.73686	2.35346	6.10647	0.00525088	-0.657159
	110	0.8352	0.741508	0.93402	1.06605	0.758958	0.855773	0.871739	0.94121	1.11399	1.43017	2.61272	1.36091	0.430056	2.6923	2.17938	6.23227	18.8187	0.0349937	0.33666
	111	0.835334	0.763994	0.931208	1.06857	0.784909	0.820395	0.852971	0.927782	1.12807	1.57203	-1.12479	1.29653	0.35073	1.75387	3.9553	1.57829	5.09593	0.0951013	0.645173
	112	0.839344	0.811367	0.929547	1.06918	0.839274	0.817592	0.90933	0.909837	1.00957	1.18512	0.990063	1.08782	0.592654	2.20259	2.21856	2.96293	1.57164	0.00731592	0.106894
	113	0.850306	0.821879	0.926805	1.03253	0.840904	0.806465	0.832175	0.925829	1.15055	1.31287	1.58728	0.723805	2.38007	1.0846	1.87844	9.68756	13.451	0.0875103	0.300599
	114	0.817518	0.749857	0.933529	1.09857	0.779917	0.856121	0.915062	0.933026	1.05224	1.15024	3.42466	0.595566	0.458459	1.81343	3.06664	13.4489	6.26451	0.0171956	-0.0550518
	115	0.819606	0.751388	0.934177	1.09765	0.781048	0.81779	0.909417	0.910009	1.01033	1.17708	-2.00428	1.14817	0.447454	2.98225	2.44048	10.4847	6.3514	0.0500898	-0.666368
	116	0.817142	0.756413	0.934953	1.1034	0.789256	0.829897	0.820177	0.93959	1.16937	0.923433	3.68096	1.04796	2.00419	1.77072	2.51095	7.7182	15.5236	0.0563988	-1.62696
	117	0.826236	0.725301	0.937141	1.08512	0.746497	0.826036	0.810955	0.939981	1.17926	1.25055	1.15516	2.42408	0.340912	0.959236	2.86792	15.8995	15.8618	0.0626047	0.103301
	118	0.843899	0.783075	0.936385	1.07551	0.80685	0.849132	0.771136	0.959185	1.2252	0.918309	-1.10952	0.986764	1.43609	1.76337	1.77003	3.69406	17.9783	0.0704971	0.611705
	119	0.841188	0.761203	0.934108	1.06439	0.779689	0.856838	0.884733	0.939324	1.098	1.5739	-1.87513	0.868633	0.347308	2.39929	2.90456	10.7237	5.91789	0.0194472	0.910604
	120	0.829266	0.741231	0.93738	1.08805	0.764868	0.850939	0.895217	0.934288	1.08162	1.16908	1.54677	1.64971	0.398535	1.23281	1.92175	9.43791	17.1245	0.0818797	0.0836602
	121	0.837142	0.756856	0.934299	1.07181	0.777186	0.820926	0.89662	0.917706	1.06257	1.3029	2.72215	1.82508	0.505796	1.6254	1.60265	6.96975	13.7544	0.0911505	-0.448838
	122	0.83101	0.757934	0.934887	1.08494	0.782878	0.828564	0.912753	0.91701	1.02692	1.25874	3.64432	1.42881	0.435635	2.39668	2.04569	1.41788	9.45965	0.073717	-0.277602
	123	0.805355	0.717787	0.932848	1.10334	0.746119	0.833959	0.885263	0.927515	1.08894	1.16426	-3.57373	1.14638	0.425911	2.74611	3.05946	14.56	14.8197	0.0438877	-0.742122
	124	0.84376	0.774199	0.929093	1.03913	0.789223	0.830403	0.867715	0.929476	1.11192	1.52503	1.32601	0.96001	0.793088	2.11668	1.90072	8.26547	13.5956	0.0201772	-0.0953323
	125	0.818298	0.713485	0.937106	1.09235	0.73617	0.857345	0.814116	0.953388	1.17994	1.1046	-0.0715257	2.25922	0.306281	1.03311	2.61555	6.32397	16.1322	0.00269578	0.268802
	126	0.833186	0.783159	0.930932	1.07799	0.809823	0.838443	0.883038	0.930256	1.09389	1.06307	2.29981	0.800101	1.79741	2.02546	1.93479	2.18589	14.6039	0.0545949	-0.752593
	127	0.840112	0.801179	0.928191	1.06145	0.825079	0.855433	0.927967	0.928031	1.00302	1.2654	-1.93354	0.551642	0.886505	1.48382	1.88046	4.2641	9.29096	0.0854185	0.532019
	128	0.848778	0.798952	0.927871	1.02871	0.814545	0.806808	0.837124	0.924834	1.14449	1.51464	-2.40467	0.790261	1.13582	0.982901	2.18953	9.88205	15.8834	0.0733763	0.358994
	129	0.811546	0.72509	0.940668	1.11346	0.756728	0.872641	0.884669	0.947108	1.10249	0.917109	2.65408	1.36725	0.345404	0.746069	2.22567	16.4876	15.4665	0.0487787	0.320339
	130	0.812879	0.741939	0.932459	1.10023	0.77199	0.828244	0.911446	0.912954	0.983727	1.14104	0.434294	0.902379	0.589115	2.02921	2.05985	13.8191	8.90019	0.0184552	-1.2687
	131	0.846599	0.796552	0.934619	1.06901	0.820129	0.801601	0.773586	0.93807	1.21778	1.01737	0.819253	1.33926	1.83166	1.44352	1.68202	6.52423	11.451	0.0688989	-0.767153
	132	0.834693	0.803569	0.930139	1.0771	0.833387	0.801907	0.884367	0.910232	1.07289	1.04144	-1.02773	1.50645	1.39503	1.91993	1.38964	2.07925	4.75056	0.0839431	-1.5041
	133	0.837044	0.742263	0.937466	1.07466	0.761373	0.847346	0.827488	0.946072	1.16387	1.14204	2.42057	2.3421	0.405711	1.90485	1.6487	8.60379	15.9484	0.0591307	0.501824
	134	0.849793	0.80199	0.928219	1.02991	0.817899	0.806474	0.793556	0.935264	1.19603	1.38524	0.91734	0.828863	1.29003	1.9139	2.22811	4.7909	8.41374	0.0103049	0.223463
	135	0.819806	0.761746	0.935643	1.10264	0.794843	0.830125	0.915233	0.915236	1.00075	1.19947	3.55578	1.01271	0.300128	1.88685	3.07036	15.1669	3.1751	0.0818693	0.402495
	136	0.806057	0.742476	0.935143	1.11348	0.778113	0.882772	0.9369	0.940438	0.979168	0.911244	-2.2433	0.636076	0.624001	1.5442	1.71568	16.6846	18.8484	0.0891759	-0.0946937
	137	0.838461	0.792623	0.932786	1.07666	0.819416	0.818064	0.893107	0.916994	1.06735	1.06487	-1.94856	1.18997	0.906206	1.4307	1.43917	6.20174	7.80053	0.0660774	-0.426282
	138	0.812805	0.729606	0.9294	1.08933	0.754749	0.804235	0.798664	0.932978	1.18985	1.12315	1.42884	0.913895	1.00917	2.89086	3.32969	9.24209	15.368	0.0097558	-1.53748
	139	0.82827	0.771828	0.935367	1.0935	0.802157	0.870094	0.914444	0.940682	1.06165	0.940901	-2.50211	0.728602	1.00205	0.783723	1.78933	15.705	12.5014	0.0421396	0.0185888
	140	0.80151	0.706689	0.930101	1.09835	0.732657	0.845514	0.854872	0.939551	1.13194	1.38333	-0.291052	1.05204	0.306595	2.51934	3.99271	6.46608	17.2222	0.0361035	-0.109339
	141	0.815954	0.727367	0.936461	1.10024	0.754557	0.867121	0.931845	0.935276	1.02135	1.02771	-1.84246	2.34723	0.356491	1.0982	1.26727	10.9368	14.3206	0.0455035	-0.339504
	142	0.83008	0.778479	0.931348	1.08283	0.806356	0.806285	0.859626	0.919086	1.11471	1.07982	1.75942	0.827031	2.00914	0.961286	2.40143	4.97376	18.1649	0.0890057	-1.27267
	143	0.840725	0.750931	0.934637	1.06084	0.767489	0.846458	0.914649	0.927655	1.04529	1.57157	0.160371	2.00817	0.395911	1.7738	1.80086	14.6362	9.38745	0.0242473	-0.215388
	144	0.806645	0.726817	0.937766	1.11411	0.759718	0.834213	0.91146	0.921222	1.04041	0.977842	2.28305	1.7222	0.479489	1.8693	1.90259	18.574	9.54144	0.0483628	-1.39443
	145	0.811576	0.775093	0.934468	1.1109	0.815639	0.838669	0.918415	0.921413	1.02191	0.903067	-2.75465	0.76032	0.495405	1.5696	3.30278	10.4747	1.87944	0.00709451	0.171049
	146	0.843339	0.767073	0.929516	1.03371	0.780568	0.841415	0.859907	0.936547	1.1249	1.59436	-0.367152	0.986861	0.693535	2.82169	1.82937	6.86264	17.3673	0.0190947	0.35845
	147	0.80821	0.733202	0.936752	1.11207	0.76629	0.807328	0.8562	0.920502	1.11983	1.02159	-2.74854	1.39511	0.423248	0.390115	3.31515	6.77064	12.8569	0.0861151	-0.665895
	148	0.835372	0.752785	0.933572	1.07102	0.772714	0.832634	0.871561	0.929776	1.10754	1.42532	-0.128697	1.11425	0.46209	2.48649	2.75515	16.603	10.81	0.0550699	0.0253869
	149	0.840428	0.786004	0.93259	1.07115	0.809769	0.847715	0.895697	0.920894	0.932019	1.48356	0.396323	1.02308	0.356298	2.36972	1.83616	8.63553	3.87463	0.0696713	0.684438
	150	0.801619	0.736115	0.93665	1.11953	0.77343	0.828755	0.911628	0.913193	0.983441	0.96353	1.24702	1.1934	0.488036	2.24409	1.97116	19.456	6.97411	0.0409928	-1.20677
	151	0.848519	0.787757	0.93114	1.04605	0.804592	0.815015	0.824211	0.931807	1.16202	1.25186	2.62812	1.29872	0.941955	0.994205	1.31256	9.14087	16.1077	0.0513626	0.119319
	152	0.82227	0.769434	0.934807	1.09934	0.802408	0.801434	0.759205	0.941709	1.23363	0.896924	3.45915	0.874022	1.32342	2.2454	3.25981	1.26148	12.3948	0.0881645	-0.312684
	153	0.804861	0.731545	0.933438	1.10925	0.76399	0.869166	0.878655	0.933002	0.898827	1.1218	2.08781	0.789646	0.349941	1.38584	1.45628	5.25117	19.9034	0.0706776	0.0144132
	154	0.83485	0.785517	0.936611	1.09011	0.815977	0.83462	0.836988	0.938091	1.1508	0.922491	-3.50928	0.895573	1.46539	0.527958	2.28288	6.17403	12.8319	0.0557825	-0.235076
	155	0.828756	0.76498	0.936462	1.09389	0.794132	0.83553	0.915515	0.916772	0.985476	1.24508	2.27651	1.19916	0.321486	1.59789	2.39382	12.8301	4.17899	0.0589374	0.317806
	156	0.805438	0.715918	0.933968	1.10488	0.74438	0.849011	0.842658	0.943689	1.14692	1.08106	-0.195552	0.95958	0.398792	1.16411	3.44023	3.11561	15.9708	0.0169403	-0.1271
	157	0.823149	0.720919	0.932739	1.07525	0.739808	0.809266	0.867465	0.918765	1.10472	1.49403	0.0191897	2.04324	0.446432	1.12515	2.83438	4.3947	14.1314	0.00986759	-1.47621
	158	0.808636	0.704533	0.931947	1.09056	0.72711	0.800696	0.758349	0.941671	1.23451	1.22718	-1.33581	2.8351	0.333209	2.5337	3.65368	5.82565	15.0453	0.0336103	-0.351094
	159	0.830737	0.829014	0.920803	1.05869	0.860287	0.830389	0.883803	0.91146	0.924751	1.18198	-3.58705	0.696936	1.03395	1.55269	1.87532	15.6401	1.83115	0.00396708	0.0117044
	160	0.802753	0.760235	0.936741	1.12187	0.803448	0.815691	0.908132	0.908162	1.00237	0.900563	1.85756	0.738949	0.612901	0.54969	2.70423	6.82223	7.45558	0.0689384	-0.604841
	161	0.838464	0.751265	0.937063	1.07532	0.77145	0.83765	0.830541	0.940979	1.15885	1.29585	-0.680059	2.30136	0.345862	0.716955	3.06289	13.0531	5.5529	0.00412824	0.0447229
	162	0.841136	0.789017	0.930506	1.06384	0.811296	0.799792	0.802592	0.929983	1.18457	1.16027	3.62754	1.01937	1.27723	1.67744	2.58231	16.6435	5.25829	0.00703335	-0.817425
	163	0.829041	0.759145	0.932877	1.08321	0.784172	0.831971	0.916119	0.916119	1.0002	1.24866	-0.406956	1.0676	0.53475	1.75788	1.86289	1.73522	12.1695	0.0589602	-0.464881
	164	0.81169	0.721285	0.933286	1.09689	0.747325	0.857469	0.871029	0.942167	1.11528	1.20059	3.50913	0.917773	0.393334	2.43498	3.1244	16.4908	12.0688	0.0139548	-0.190813
	165	0.853331	0.792325	0.932408	1.03801	0.807347	0.821231	0.872342	0.923827	1.10244	1.53849	0.000392762	1.48883	0.552134	0.666941	1.82158	7.8045	5.65476	0.0113483	0.268402
	166	0.840105	0.801338	0.932772	1.07559	0.829025	0.845945	0.832209	0.944385	1.15831	0.980706	-2.16025	0.509224	2.43238	2.85396	2.76066	13.7358	6.64611	0.0615125	0.58846
	167	0.84731	0.824061	0.929547	1.05628	0.848925	0.801349	0.801835	0.93088	1.18572	1.11217	1.4594	0.663703	1.73248	2.16958	2.67983	8.02482	5.32189	0.0787258	0.742618
	168	0.845549	0.800078	0.926259	1.03457	0.817419	0.824069	0.830011	0.934684	1.15694	1.32177	2.90512	0.631865	2.88834	1.5399	2.18906	4.32397	11.6602	0.0102818	-0.158666
	169	0.843752	0.790236	0.92779	1.0454	0.808361	0.838539	0.89451	0.927892	1.077	1.39117	3.51287	0.86041	0.938796	2.29604	1.5264	1.72738	18.3419	0.0973898	0.201305
	170	0.840145	0.778418	0.932319	1.06834	0.800383	0.820361	0.896343	0.917434	1.06267	1.4978	0.307941	0.947371	0.43686	2.08531	3.12642	6.16668	4.28844	0.0465022	0.171909
	171	0.805968	0.743263	0.936187	1.11558	0.779812	0.818387	0.887085	0.905367	0.938402	1.10302	-2.40201	1.00657	0.336258	1.17086	2.57144	3.08603	7.111	0.0745023	-0.394415
	172	0.841997	0.821878	0.930474	1.0687	0.851089	0.801717	0.838955	0.921852	1.14081	1.03534	-1.42347	0.834479	2.67663	2.0947	2.25039	5.38529	5.89458	0.0717849	-0.284866
	173	0.814268	0.751267	0.931409	1.09855	0.782167	0.830685	0.851956	0.933012	1.13202	1.04861	-3.47988	0.655655	0.598449	2.72418	3.56009	4.03598	9.35638	0.0497912	0.012748
	174	0.819999	0.746445	0.936871	1.10161	0.776439	0.854085	0.927349	0.927515	1.00492	1.20239	-1.5371	0.958695	0.309057	1.65265	2.74752	6.06934	5.99808	0.0275154	0.213059
	175	0.845448	0.788174	0.936837	1.07557	0.812463	0.824473	0.716916	0.962242	1.28055	0.902097	3.7146	1.0475	2.90076	1.34585	2.09666	9.54913	11.9887	0.0242421	0.102987
	176	0.843473	0.779338	0.932772	1.06319	0.799551	0.833056	0.850809	0.934405	1.134	1.21012	-0.0282793	0.896096	0.855435	1.14942	2.09324	3.32433	17.4381	0.0735667	0.213554
	177	0.836036	0.770562	0.933651	1.07739	0.79445	0.802377	0.880785	0.911577	1.07996	1.15815	1.11802	1.32767	0.840469	0.384269	1.60108	19.553	14.5611	0.0572494	-1.09619
	178	0.838745	0.798859	0.923079	1.04102	0.81873	0.805232	0.902532	0.905015	1.02186	1.44017	-3.24905	0.556517	2.67046	0.792141	2.05337	2.45451	17.2321	0.0472298	-0.839893
	179	0.833886	0.743336	0.93462	1.07251	0.762631	0.836275	0.882195	0.92938	1.09429	1.3066	-1.5686	1.78605	0.471447	1.01397	2.05417	2.99671	10.7389	0.00767476	-0.640739
	180	0.808033	0.712425	0.930393	1.09174	0.73649	0.840872	0.907473	0.926231	1.05585	1.49462	-2.7046	0.987021	0.376399	1.65118	3.52531	12.5924	13.0861	0.0136206	-1.06513
	181	0.834276	0.778614	0.928342	1.06698	0.801529	0.807866	0.903655	0.906461	1.02308	1.3462	1.75157	0.744312	0.980549	1.1612	2.10717	3.03958	16.8225	0.0936106	-0.836368
	182	0.832263	0.778625	0.933122	1.0841	0.806451	0.829138	0.914413	0.914457	0.997245	1.20102	-3.35402	1.08866	0.43832	2.22856	2.1395	6.49648	4.63094	0.0620458	0.241882
	183	0.838564	0.842824	0.931758	1.07697	0.881163	0.816549	0.860888	0.92398	1.1165	0.886132	-1.04207	1.15136	1.7716	0.944723	1.73297	10.3411	1.68915	0.0504913	0.352453
	184	0.832345	0.832312	0.930097	1.08118	0.870992	0.814521	0.89388	0.914708	1.06314	0.920137	0.386471	0.988377	1.34473	2.18947	1.81589	14.9379	1.37957	0.062976	0.225754
	185	0.821472	0.814484	0.92856	1.09074	0.854817	0.819673	0.907567	0.913166	1.03168	0.951336	3.43207	1.00773	2.47331	0.977004	2.72343	14.685	2.65187	0.00298486	-1.45259
	186	0.812399	0.758764	0.936505	1.11194	0.795961	0.807279	0.87061	0.916911	1.09919	0.929526	-2.97295	0.987954	0.632844	1.02109	3.01024	10.0743	6.92956	0.0753751	-0.594616
	187	0.820275	0.761101	0.931084	1.09224	0.790679	0.814695	0.793718	0.93889	1.19702	0.991849	-3.16348	0.658426	1.13347	2.16905	3.55736	1.02094	15.8114	0.0959322	-0.137196
	188	0.82258	0.74056	0.935449	1.09325	0.766661	0.866789	0.92428	0.931787	0.967129	1.33351	1.50598	0.96713	0.342341	1.84354	2.01032	8.20844	15.2791	0.075094	0.156969
	189	0.823799	0.742968	0.926427	1.06616	0.762777	0.815347	0.822622	0.932326	1.16396	1.54918	-3.10537	0.796316	0.521773	1.81181	3.93099	18.7342	13.9081	0.0608051	-0.0850927
	190	0.845917	0.804387	0.931968	1.0636	0.82798	0.814647	0.852489	0.925025	1.12704	1.13133	0.912642	0.924769	1.09964	2.00322	1.89049	7.15572	6.68398	0.0421761	0.0200526
	191	0.844815	0.7915	0.931063	1.05857	0.812147	0.834897	0.882519	0.913851	0.920124	1.61167	-0.347558	1.05512	0.412109	1.74145	1.51301	16.1971	4.37693	0.0617605	0.419801
	192	0.836636	0.804669	0.926375	1.06299	0.830394	0.817696	0.894319	0.916422	1.06468	1.12795	-2.73488	0.958477	2.7088	2.46611	1.33403	7.54566	12.5094	0.0988735	-1.09462
	193	0.851967	0.785959	0.936588	1.06099	0.804879	0.813303	0.724713	0.95566	1.27169	0.946594	0.374074	2.16846	1.05219	1.52182	1.02943	16.6669	5.49177	0.022754	-0.0846765
	194	0.81583	0.730795	0.93208	1.09168	0.756171	0.849944	0.841044	0.94444	1.14893	1.05965	-2.88327	0.826163	0.863965	1.65522	2.85296	12.2392	16.7201	0.00871239	-0.841215
	195	0.827487	0.799397	0.920119	1.05862	0.825576	0.815824	0.771159	0.91162	0.788915	1.58397	-3.26938	0.7144	0.466178	2.04909	1.36307	14.9851	2.2947	0.00470008	-0.281877
	196	0.833901	0.771757	0.933459	1.08077	0.797161	0.80075	0.815764	0.927154	1.16922	1.172	1.68392	0.950865	0.542645	1.35302	3.281	14.3786	6.69996	0.0726225	0.324535
	197	0.800065	0.71437	0.932793	1.10879	0.744592	0.820302	0.909885	0.912337	1.02088	1.23368	3.70412	1.19414	0.429798	0.842144	3.05961	12.9455	10.3643	0.00453815	-1.87853
	198	0.835265	0.756575	0.931985	1.06774	0.776303	0.859973	0.927991	0.931971	1.02361	1.41331	3.25014	0.943824	0.519135	0.782111	1.81083	5.98122	16.8353	0.0253558	-0.0584472
	199	0.824083	0.75873	0.932774	1.0903	0.786604	0.877759	0.877344	0.950772	1.11234	0.94549	0.1733	1.00121	2.46907	0.682215	1.69953	15.723	15.7597	0.00840489	-1.37513
	200	0.837048	0.76988	0.936794	1.08407	0.795325	0.833662	0.803496	0.945095	1.18868	0.994163	2.68505	1.00303	0.80815	1.46495	2.28047	3.64122	16.1354	0.0845821	0.303953
	201	0.816851	0.730694	0.924749	1.06861	0.750691	0.805669	0.781716	0.937847	1.20925	1.52553	-1.35703	0.898752	0.475866	0.869233	4.39037	3.09771	18.1451	0.0316308	-0.0724357
	202	0.834715	0.772893	0.935835	1.08595	0.799817	0.826813	0.770949	0.949681	1.22346	0.931708	-3.4019	1.02652	2.10774	1.19887	2.343	13.6075	16.3368	0.0557418	-0.624098
	203	0.849601	0.810097	0.929723	1.04749	0.830093	0.817431	0.834652	0.930514	1.15004	1.18474	-1.96949	1.01142	1.29455	1.85796	1.64151	19.9324	4.53222	0.0134753	-0.0044083
	204	0.822805	0.752054	0.937036	1.09982	0.781945	0.827596	0.808179	0.941277	1.18261	0.932563	2.48277	1.10753	1.09255	0.820589	2.44493	18.4674	12.2243	0.02574	-1.02325
	205	0.825823	0.761801	0.923763	1.06199	0.783013	0.833673	0.844787	0.935964	1.14139	1.27789	0.9062	0.580414	2.16352	0.99492	3.79384	8.87953	19.5466	0.00101248	-1.44587
	206	0.830268	0.740302	0.929396	1.05904	0.757157	0.816482	0.780911	0.942821	1.2115	1.40895	-0.398359	0.94319	0.605378	2.18431	3.26789	5.83485	18.4396	0.016735	0.0599189
	207	0.833711	0.799523	0.930012	1.0777	0.828959	0.818307	0.872963	0.922139	1.10038	1.10817	-2.62562	0.709569	0.718346	1.63056	3.16063	1.40596	4.23815	0.0904739	0.619809
	208	0.839088	0.785539	0.934849	1.07975	0.811881	0.813685	0.84823	0.925616	1.13229	1.08062	-3.63659	1.1739	0.528352	1.61089	2.52488	14.3425	4.32805	0.078355	0.693868
	209	0.817047	0.772189	0.931634	1.09942	0.806765	0.808134	0.885731	0.913442	1.0746	1.0993	3.22814	1.01696	0.352548	1.65998	4.20599	7.4111	1.0523	0.0753291	0.528724
	210	0.824278	0.790256	0.927772	1.0843	0.82204	0.8649	0.931379	0.933926	1.01852	0.965777	-3.42971	1.12883	1.37017	1.48482	1.35533	1.70714	5.28389	0.00400145	-1.02694
	211	0.827852	0.798778	0.927167	1.07886	0.829804	0.80539	0.880467	0.898402	0.937023	1.2195	3.48008	0.916356	0.584848	1.67228	2.53743	16.55	1.23145	0.00670184	-0.510326
	212	0.831252	0.739694	0.935735	1.07937	0.760565	0.861715	0.880393	0.94252	1.10489	1.25414	-2.89297	1.43783	0.39265	1.34849	2.26092	3.2745	17.4312	0.0465743	0.464866
	213	0.832239	0.766638	0.93138	1.07616	0.790361	0.841836	0.920802	0.920841	0.997492	1.22999	-0.0667144	1.09914	0.559087	1.43482	1.50197	11.8886	6.96036	0.0133054	-0.444862
	214	0.815054	0.818883	0.925239	1.09079	0.862263	0.82043	0.878517	0.905999	0.923047	0.927761	1.07642	0.590774	1.82997	1.25998	1.6835	2.99714	3.49508	0.0536324	-0.063691
	215	0.841166	0.786939	0.930417	1.06272	0.808637	0.835342	0.876633	0.930086	1.10164	1.18472	-1.05326	0.626787	1.13906	0.670431	2.03488	2.57253	19.0634	0.0619201	0.411203
	216	0.829872	0.774546	0.932248	1.08453	0.80228	0.807684	0.827692	0.927466	1.1563	1.03058	-2.82098	1.15462	2.40363	1.4933	2.11023	12.9464	16.008	0.0973571	-1.82882
	217	0.801686	0.716806	0.933165	1.10831	0.747016	0.826847	0.797022	0.943599	1.19498	1.04144	-0.658846	0.944724	0.303668	1.75805	3.97294	1.04419	13.9432	0.0445502	0.839007
	218	0.817423	0.727432	0.932037	1.08764	0.751016	0.809574	0.832544	0.927277	1.15084	1.26754	1.00582	1.2881	0.479274	2.29819	3.24518	8.55769	14.638	0.0405229	-0.704503
	219	0.842128	0.777106	0.931087	1.0587	0.796316	0.86336	0.879207	0.943521	1.10678	1.29319	-2.03446	0.603353	0.758611	1.79471	2.26901	14.619	10.1545	0.0281811	0.621136
	220	0.846295	0.804057	0.931449	1.06092	0.826844	0.853256	0.801522	0.954189	1.19312	0.99788	-2.77108	1.01945	2.57139	1.39251	1.72401	2.69839	7.93642	0.00529459	-0.102711
	221	0.84932	0.776208	0.935033	1.05595	0.793283	0.816094	0.843413	0.92788	1.13899	1.35585	3.68946	1.65839	0.521823	0.39273	2.02555	17.3972	6.80943	0.0134727	0.0324475
	222	0.840742	0.778171	0.937477	1.08236	0.803747	0.803773	0.714189	0.954576	1.28218	0.917342	-2.23866	1.20013	2.14209	0.734674	2.3092	17.9498	18.8243	0.0786489	-0.470065
	223	0.815169	0.715116	0.934603	1.09199	0.738429	0.827094	0.882936	0.924442	1.08941	1.24461	0.440266	1.85428	0.437013	1.70414	2.34886	15.3896	15.6378	0.021643	-1.2065
	224	0.814668	0.721087	0.928257	1.07882	0.742255	0.852371	0.818225	0.950274	1.17484	1.54993	-2.06841	0.834112	0.308531	1.46798	4.31374	1.09242	11.9626	0.00966099	0.416875
	225	0.838506	0.782099	0.936486	1.08412	0.809288	0.808408	0.768123	0.942425	1.22462	0.954804	3.45194	1.41502	1.66976	1.38327	1.94211	6.55478	12.6069	0.0858682	-1.08328
	226	0.82275	0.747876	0.938763	1.10247	0.777927	0.806003	0.762941	0.942727	1.23004	0.910563	2.73487	1.29785	0.697296	0.79973	2.79244	10.6779	16.1501	0.0876587	-0.373735
	227	0.846438	0.772453	0.93453	1.05939	0.790323	0.820861	0.82575	0.9342	1.16135	1.24605	2.97065	1.32306	0.653819	1.03294	1.84519	13.9344	12.411	0.0413982	0.218221
	228	0.832445	0.730979	0.934029	1.06503	0.747432	0.8531	0.866327	0.940939	1.11992	1.64303	-1.02947	1.52822	0.374271	1.17615	2.84991	15.414	19.3794	0.036218	0.134803
	229	0.830594	0.778517	0.932609	1.08523	0.807	0.805668	0.903304	0.903407	1.00448	1.1335	0.746755	1.3152	0.609113	1.63453	1.71223	4.78863	4.48038	0.0277486	-0.824204
	230	0.838343	0.762733	0.933673	1.07003	0.783224	0.833815	0.897382	0.924702	1.06972	1.4834	1.29834	1.03535	0.453859	1.86316	2.68888	12.2308	10.8426	0.0976457	0.16024
	231	0.827123	0.770002	0.934567	1.09286	0.800015	0.804897	0.86965	0.915921	1.09961	1.14542	-0.895123	1.22403	0.376218	1.97506	3.49407	5.54441	2.8498	0.0639224	0.336258
	232	0.805172	0.737589	0.935526	1.11415	0.772686	0.803256	0.896219	0.899482	0.974182	1.17701	2.20374	1.06834	0.349544	1.03792	2.99518	9.22774	5.97871	0.0469879	-0.885378
	233	0.806103	0.732668	0.931349	1.10397	0.763475	0.804044	0.842503	0.922183	1.13693	1.08944	-3.13018	0.944878	0.54673	1.34049	3.6227	10.1759	12.4492	0.0611209	-0.770615
	234	0.841025	0.798311	0.932011	1.07138	0.824042	0.831496	0.836512	0.93671	1.15074	1.01625	0.446771	1.08276	2.56838	1.83068	1.53001	6.4785	13.6411	0.0828696	-0.805494
	235	0.815795	0.725281	0.938414	1.10389	0.753253	0.84421	0.783266	0.954328	1.21187	0.891942	-2.02777	1.46028	0.539451	2.57322	2.4978	8.91372	13.8107	0.021886	-0.183566
	236	0.830503	0.756838	0.935065	1.08584	0.781956	0.829661	0.895416	0.922908	1.07067	1.23974	-2.06669	1.25946	0.410316	2.67607	2.62836	12.0709	5.82259	0.0392106	-0.0514502
	237	0.832504	0.787902	0.932014	1.08277	0.816937	0.80208	0.901529	0.901627	1.00438	1.1908	3.6633	1.51393	0.456389	2.65729	2.45401	2.91472	1.43589	0.0168224	-0.376782
	238	0.840544	0.777005	0.933759	1.07172	0.799513	0.833632	0.827397	0.939747	1.16174	1.09496	-3.31868	0.81362	0.991921	1.11376	2.35434	14.9591	12.1956	0.0402925	0.158414
	239	0.819791	0.824967	0.926643	1.08828	0.867859	0.820013	0.910128	0.911661	1.01653	0.915601	0.775702	1.28474	1.85554	1.72403	1.84238	6.06238	1.10142	0.0864183	-0.970604
	240	0.810553	0.74647	0.934074	1.10733	0.779972	0.833007	0.822798	0.940438	1.16689	0.90643	-2.91056	0.798034	2.09959	1.19906	3.04079	13.1074	19.4902	0.0575547	-1.31882
	241	0.832029	0.755474	0.932037	1.07415	0.777118	0.84126	0.896482	0.928921	1.07526	1.34932	1.00933	0.842237	0.580672	2.11049	2.5646	1.77294	16.9282	0.0671689	-0.156111
	242	0.833056	0.77455	0.927867	1.06638	0.796978	0.832584	0.88464	0.926875	1.08922	1.17008	2.66731	0.791319	2.4792	1.6638	1.85056	12.8497	13.6351	0.0152836	-1.3697
	243	0.839201	0.803373	0.931402	1.07356	0.831047	0.865404	0.88013	0.944345	1.10617	1.00937	2.16278	0.696118	1.29298	2.37181	2.24153	16.5826	3.63909	0.00650844	0.281804
	244	0.825282	0.736133	0.930143	1.07177	0.755878	0.8358	0.794577	0.948096	1.19876	1.44384	3.6479	0.882528	0.407126	2.16414	3.67213	13.4226	15.2882	0.0446457	0.682398
	245	0.814449	0.738668	0.932289	1.09686	0.766919	0.806328	0.836585	0.924736	1.14505	1.1021	-2.77619	1.03931	0.633454	2.04283	3.18206	10.7841	15.0098	0.0867338	-0.816828
	246	0.826076	0.776885	0.9321	1.08995	0.80744	0.811338	0.791979	0.937792	1.1985	0.956028	-1.6282	0.611425	2.25513	1.50382	3.4837	2.25804	13.7716	0.0925944	-0.231155
	247	0.826133	0.720133	0.932376	1.06593	0.736551	0.82382	0.773127	0.947927	1.22082	1.46662	-1.14456	1.81155	0.371815	1.41175	3.18304	19.6659	19.6936	0.0215391	0.410791
	248	0.833503	0.76961	0.928731	1.06641	0.791218	0.804895	0.902747	0.902767	1.00196	1.39588	3.72178	1.07196	0.686072	1.35042	1.71977	19.9076	6.8964	0.0141866	-1.19523
	249	0.837352	0.773171	0.928374	1.05759	0.792624	0.831501	0.85442	0.932848	1.12917	1.20642	0.817286	0.849645	2.02571	0.612566	1.93505	18.6297	18.7024	0.0125931	-0.999721
	250	0.822211	0.735908	0.933237	1.08658	0.759602	0.814225	0.907661	0.908039	1.00835	1.38133	-0.771595	1.22192	0.478761	1.37921	2.29556	16.9731	12.2118	0.0326903	-1.21605
	251	0.833762	0.772771	0.933706	1.08192	0.798687	0.817774	0.863723	0.924005	1.11312	1.1986	1.64458	0.878994	0.537673	1.55908	2.94401	11.0677	7.85044	0.0934624	0.267578
	252	0.834238	0.804547	0.930387	1.07852	0.835104	0.820968	0.902431	0.915948	1.04955	1.03641	-0.206896	0.725992	2.20349	0.856511	1.87344	12.6501	7.92736	0.0458676	-0.654073
	253	0.82337	0.729109	0.934524	1.08494	0.751242	0.887636	0.919703	0.948997	1.06202	1.58018	2.28892	0.629027	0.307711	2.01592	3.16043	18.5502	15.2128	0.0418935	0.537598
	254	0.814979	0.731408	0.933575	1.09663	0.758355	0.84362	0.811814	0.947704	1.18077	0.992251	-2.57591	0.902278	0.900329	2.34304	2.79738	13.9763	18.3702	0.0217735	-0.721876
	255	0.847586	0.779727	0.930875	1.0407	0.794853	0.845375	0.913738	0.927256	1.04636	1.60812	-0.862971	1.24158	0.563282	2.25402	1.39412	16.1608	13.5206	0.0988978	0.533152
	256	0.850145	0.820242	0.933229	1.0629	0.845408	0.827172	0.805909	0.941597	1.1851	0.969409	-2.9137	1.09013	1.81921	2.49724	1.46919	13.2881	4.44213	0.0297969	0.336534
	257	0.800705	0.72335	0.934946	1.11469	0.756793	0.808241	0.873043	0.916822	1.09591	1.03315	-0.270396	1.09078	0.599338	1.00519	3.03042	7.66513	18.9839	0.0894	-1.47962
	258	0.81007	0.727859	0.939861	1.11439	0.760505	0.836099	0.817901	0.942982	1.17294	0.88562	-2.44762	1.45537	0.366368	1.2122	2.97742	15.7307	11.9837	0.0794101	0.282434
	259	0.842467	0.777112	0.933601	1.06742	0.798195	0.808878	0.834454	0.926477	1.14832	1.2876	0.789416	1.01916	0.581102	0.62735	2.95433	4.23043	7.26115	0.0206688	0.0717529
	260	0.838341	0.756361	0.928662	1.0396	0.77043	0.846177	0.872791	0.936291	1.11011	1.49058	-3.5024	1.39555	0.582648	1.7459	1.36609	9.92213	19.4617	0.0165631	0.445489
	261	0.835663	0.770989	0.939266	1.09236	0.799434	0.829379	0.783114	0.947885	1.21053	0.886758	-1.26657	1.41378	1.10762	1.7866	1.85368	12.9194	11.9106	0.0958122	-0.496244
	262	0.824817	0.725147	0.929921	1.06391	0.742029	0.842579	0.841382	0.94093	1.14721	1.59815	-0.108933	1.04723	0.433324	1.31145	3.36175	3.69186	18.3542	0.00472256	-0.314405
	263	0.824103	0.745982	0.933553	1.08827	0.771267	0.814993	0.74697	0.950618	1.24816	0.973427	-3.28535	1.1626	1.80146	0.973824	2.80764	17.7056	13.9544	0.00822759	-1.46307
	264	0.836075	0.765927	0.930753	1.06628	0.786452	0.841312	0.918132	0.923375	1.02883	1.60778	0.914903	0.58975	0.547408	2.06565	2.946	9.85386	9.60656	0.0501513	-0.261682
	265	0.831428	0.767224	0.935895	1.08945	0.79488	0.848061	0.768667	0.95933	1.22773	0.92032	-0.184549	1.06539	0.966543	0.665266	2.97562	3.96622	11.4408	0.00168987	-0.141704
	266	0.825299	0.739215	0.931586	1.07804	0.760755	0.836484	0.918496	0.918525	1.0022	1.57299	-1.77776	0.880013	0.480043	2.37445	2.69024	1.7539	19.3851	0.0831164	-0.712092
	267	0.843453	0.785809	0.932198	1.06377	0.80709	0.828818	0.807889	0.941893	1.18311	1.08884	-2.28612	0.767419	2.26411	1.4232	2.21557	17.1116	14.4751	0.0394474	-0.231956
	268	0.825912	0.728522	0.938433	1.09066	0.751625	0.813334	0.723352	0.956067	1.27314	0.932192	-3.19337	1.95721	0.526222	1.05573	2.48865	10.8258	16.0762	0.0270648	0.0208859
	269	0.835377	0.764514	0.937122	1.08594	0.789965	0.84728	0.870346	0.937293	1.11348	1.00165	1.61792	1.39089	0.64571	0.823584	1.41355	14.7551	16.0409	0.0903532	-0.0510528
	270	0.825813	0.73415	0.931574	1.0742	0.754057	0.86189	0.865944	0.94523	1.12236	1.44748	0.0117428	0.653327	0.470407	1.10518	3.29142	9.27037	18.0801	0.01983	0.124194
	271	0.835542	0.773273	0.932559	1.07596	0.797301	0.812048	0.801608	0.935788	1.18771	1.08137	-1.15646	0.782538	1.4062	1.05358	2.84594	1.88138	18.1266	0.0557365	-0.37006
	272	0.831893	0.743748	0.935287	1.07885	0.764925	0.822512	0.852585	0.928987	1.12918	1.19065	-0.0761934	1.28157	0.446041	0.497106	1.95406	8.29634	16.3392	0.0158518	0.373308
	273	0.814192	0.754657	0.937024	1.11036	0.790126	0.847664	0.884955	0.934586	1.09464	0.890131	-1.78715	0.80715	0.88312	1.52002	2.47068	11.2941	11.0468	0.0523095	-0.513453
	274	0.801679	0.717442	0.931031	1.10426	0.746599	0.803111	0.841362	0.922008	1.13814	1.21134	1.39853	1.31897	0.378229	1.48425	3.93526	1.24699	14.1266	0.0665519	-0.690535
	275	0.801737	0.741315	0.935737	1.11878	0.779365	0.827576	0.883902	0.924453	1.08816	0.925751	3.40285	0.926989	0.652817	1.04638	3.18624	14.1398	5.55075	0.00908738	-1.20598
	276	0.824461	0.749641	0.932494	1.08631	0.774893	0.864435	0.886458	0.93007	0.910548	1.43327	2.52693	0.769232	0.326797	1.32942	1.48044	2.89174	17.4478	0.0890921	0.670445
	277	0.84612	0.788126	0.931283	1.05463	0.807168	0.844057	0.819129	0.946323	1.17272	1.15371	-3.60485	0.840451	1.15384	2.17409	1.85994	15.8641	15.6213	0.0760142	0.610009
	278	0.838715	0.755842	0.931455	1.05594	0.772436	0.843535	0.856929	0.938193	1.12903	1.26589	3.01365	1.85252	0.532287	0.792245	1.2115	2.52778	17.104	0.0137898	0.244103
	279	0.80673	0.719397	0.933599	1.10366	0.747844	0.8505	0.924161	0.927113	1.02096	1.12692	-1.3923	1.10203	0.49252	2.08294	2.15341	1.04737	18.617	0.0203393	-1.09038
	280	0.826582	0.736861	0.932849	1.07818	0.757881	0.851543	0.86481	0.940488	1.12139	1.38689	1.696	1.0214	0.402376	2.43383	3.07377	12.7053	9.62239	0.0117811	-0.044928
	281	0.826522	0.77325	0.934043	1.09309	0.804043	0.841996	0.844057	0.940057	1.14396	0.934579	-3.56267	0.723169	2.65228	1.08962	2.67714	8.34149	13.7381	0.0459959	-0.712415
	282	0.838715	0.83194	0.926487	1.06289	0.86258	0.801451	0.88663	0.909362	1.0681	1.12015	-3.56779	0.842051	0.930222	1.29459	2.65635	7.73056	1.06133	0.0230028	0.504931
	283	0.8432	0.76024	0.933358	1.05476	0.776292	0.824539	0.808446	0.939879	1.18187	1.32876	-1.24707	1.26962	0.599814	1.01687	2.36566	3.22712	12.381	0.00933824	0.180912
	284	0.824307	0.728705	0.939632	1.0961	0.753583	0.857906	0.823032	0.951778	1.17027	0.967007	-1.58293	1.94797	0.383186	2.4848	1.94553	16.0856	19.0193	0.0928066	0.458653
	285	0.847869	0.796916	0.927497	1.02768	0.81233	0.808714	0.833448	0.926621	1.14952	1.56306	-2.49946	0.718873	1.15744	1.25551	2.49462	5.31478	15.4132	0.0694177	0.29721
	286	0.844524	0.801985	0.930531	1.06078	0.824813	0.800731	0.834255	0.922556	1.14654	1.20067	0.825442	0.724731	1.25963	1.4313	2.57085	7.89565	8.56686	0.0591226	-0.0165319
	287	0.834475	0.755325	0.931794	1.06816	0.775127	0.872095	0.933703	0.937838	1.02305	1.34917	-0.880644	0.814691	0.555944	0.896467	1.68952	12.2997	17.6671	0.025324	0.126547
	288	0.816841	0.740447	0.938025	1.1063	0.771467	0.86412	0.930292	0.931394	0.987655	1.02466	-0.293181	1.29621	0.35187	0.96197	1.58336	14.0699	12.6566	0.0640498	0.131366
	289	0.837509	0.780065	0.934555	1.08015	0.805928	0.837309	0.91906	0.919416	1.00759	1.16433	-1.87147	1.24617	0.46064	1.09491	1.70621	1.65819	5.54367	0.0285797	0.219675
	290	0.828527	0.766782	0.931505	1.08273	0.792985	0.834315	0.804883	0.945052	1.18722	1.01334	-1.81434	0.623762	2.2879	0.922793	3.30466	10.519	10.3958	0.00745382	-0.637942
	291	0.82469	0.727429	0.934706	1.0822	0.748455	0.85928	0.918757	0.933992	1.04736	1.62739	1.35102	1.32904	0.324909	1.69599	2.91073	13.8574	17.9361	0.0727038	-0.0878385
	292	0.845715	0.80001	0.935206	1.07314	0.825504	0.81637	0.766497	0.946276	1.22724	0.963072	1.08479	0.868984	2.78542	0.969661	2.34926	7.1639	12.6591	0.0543826	0.0314221
	293	0.846644	0.77312	0.932966	1.05177	0.789524	0.819359	0.877848	0.921543	1.09362	1.56446	0.181788	1.34017	0.526365	2.82724	2.25597	9.31833	9.05129	0.0632297	0.0430579
	294	0.823999	0.819416	0.928387	1.08749	0.859189	0.820957	0.910246	0.912481	1.01991	0.927183	-2.20354	0.919146	1.94573	2.2469	1.73424	9.16994	2.66551	0.0479306	-0.54989
	295	0.804302	0.764059	0.936855	1.12097	0.807523	0.843408	0.9033	0.918922	0.9473	0.891098	3.42072	0.789278	0.36356	1.08098	2.23803	12.4098	4.18434	0.086387	0.462795
	296	0.808709	0.726999	0.93168	1.09957	0.755159	0.801767	0.859329	0.916888	1.11349	1.32359	-1.72099	1.79615	0.30797	1.64637	4.03752	8.36084	7.46508	0.0907079	-0.402002
	297	0.834638	0.784065	0.928254	1.06777	0.807937	0.803636	0.877943	0.91303	1.08564	1.22412	-3.29363	0.681279	1.58621	1.03675	2.62699	1.37171	14.3776	0.054078	-0.901946
	298	0.854699	0.79641	0.935289	1.05336	0.814489	0.807607	0.819489	0.929481	1.16617	1.20208	0.607955	1.77771	0.590483	1.63948	1.71344	1.97915	4.35877	0.0227977	0.512362
	299	0.816293	0.767128	0.936423	1.10883	0.804186	0.808602	0.897613	0.901964	0.970469	1.01968	-0.367005	1.90754	0.308761	1.02112	2.81178	2.18954	1.29991	0.0613925	-0.0689348
	300	0.815563	0.730381	0.934951	1.09852	0.757604	0.872641	0.935428	0.93758	1.01653	1.3005	-2.13096	0.704851	0.354607	1.53952	2.88692	1.05583	18.4025	0.0668699	0.1643
	301	0.831745	0.737771	0.930158	1.05551	0.753415	0.836945	0.814097	0.94421	1.17733	1.58182	3.62782	1.02048	0.480491	2.10441	3.1187	18.9589	14.3889	0.00984284	0.0901609
	302	0.837286	0.760762	0.936542	1.08005	0.783666	0.809585	0.87505	0.917055	1.09345	1.25218	1.74739	1.84014	0.437677	1.805	2.37909	4.42799	7.47011	0.0853477	-0.240151
	303	0.829366	0.769525	0.936515	1.09418	0.799454	0.803693	0.886225	0.91077	1.07059	1.18898	2.2068	1.57624	0.332734	0.822954	3.33967	5.85524	2.91205	0.0819229	0.242013
	304	0.84277	0.778239	0.932777	1.06431	0.798696	0.828732	0.881182	0.925672	1.0927	1.42475	1.31194	0.910737	0.518171	2.27822	2.69393	11.7558	7.52751	0.0796382	0.390788
	305	0.85272	0.789872	0.934339	1.05093	0.807002	0.809553	0.866204	0.919232	1.10667	1.50229	-2.9477	2.50274	0.409844	2.45943	2.58502	14.0913	1.93617	0.0868786	0.547996
	306	0.834681	0.785394	0.929709	1.07257	0.810661	0.813131	0.905558	0.909469	1.0269	1.17561	0.725803	0.942779	1.04453	0.855189	1.57395	7.78508	9.0843	0.0253753	-0.954479
	307	0.82886	0.744454	0.934783	1.08317	0.767334	0.816607	0.829855	0.931256	1.15564	1.24055	-1.41089	1.40488	0.422254	2.3127	3.01758	18.3895	9.79404	0.0647243	0.0644253
	308	0.828413	0.769667	0.931645	1.08403	0.796725	0.802049	0.803165	0.930839	1.18428	1.058	3.21394	0.843847	1.74455	2.38335	2.79952	9.57811	16.5436	0.088732	-1.02897
	309	0.807319	0.723677	0.933903	1.10496	0.753079	0.812554	0.89722	0.91261	1.0541	1.13108	-3.5605	1.38324	0.514617	1.87299	2.57655	7.74965	16.0265	0.0752431	-1.42229
	310	0.845914	0.780697	0.929431	1.03863	0.795986	0.824517	0.821339	0.936897	1.16715	1.61593	0.852409	0.756716	0.676877	1.76305	3.07359	4.56699	8.57781	0.0235393	0.410881
	311	0.83033	0.75068	0.9335	1.07962	0.773286	0.863523	0.917902	0.936529	1.05207	1.28364	0.657164	0.883108	0.492209	2.66366	2.168	2.53414	17.3737	0.0604536	0.17335
	312	0.816177	0.740609	0.933215	1.09715	0.768947	0.825938	0.827698	0.910766	0.852604	1.38595	0.225051	1.25774	0.313317	1.26874	1.36405	5.80516	12.0939	0.0591662	-0.420042
	313	0.813762	0.729683	0.934022	1.09871	0.757154	0.802889	0.74576	0.945858	1.24841	0.96439	-2.47042	1.24369	0.738663	1.69137	3.28055	1.87167	15.3179	0.0218828	-0.747556
	314	0.829104	0.738729	0.928604	1.05746	0.75533	0.843974	0.901909	0.929228	1.06792	1.38159	-2.84391	1.86779	0.54288	1.60093	1.18292	19.2489	18.5434	0.0137733	-0.530843
	315	0.818971	0.729348	0.936748	1.09741	0.755536	0.853301	0.909874	0.924239	0.951184	1.42344	-0.6128	1.16899	0.315996	0.668193	2.26108	9.82759	15.946	0.0485983	-0.407027
	316	0.833499	0.777128	0.935311	1.08737	0.805442	0.839793	0.789004	0.951061	1.20524	0.924777	3.11844	1.09732	2.46831	2.00215	2.06896	3.04504	15.9023	0.057635	-0.848403
	317	0.841889	0.776479	0.930272	1.05542	0.794994	0.840115	0.843437	0.939384	1.14435	1.28146	-3.46111	0.726232	0.725349	1.53831	2.40918	2.99299	9.11652	0.00929732	0.632211
	318	0.831851	0.740668	0.93619	1.08009	0.761741	0.860273	0.899483	0.938299	1.07935	1.41108	-0.142226	1.25357	0.355628	1.03237	2.61891	12.5665	16.0137	0.0704052	0.416183
	319	0.839863	0.789944	0.936768	1.08439	0.818332	0.822034	0.829163	0.933919	1.15754	0.95781	0.872179	1.04428	1.11498	1.16196	1.91825	16.7602	8.31834	0.059195	-0.122112
	320	0.848428	0.785383	0.929997	1.03525	0.800207	0.801689	0.783033	0.935778	1.20724	1.44434	-2.59445	1.01168	0.814905	1.77301	2.53819	10.3065	7.97769	0.0171779	0.350249
	321	0.82527	0.743904	0.930526	1.07719	0.765907	0.806694	0.737052	0.949716	1.2581	1.05622	-3.70536	0.989045	1.7433	2.29261	2.96996	14.4841	18.6359	0.0136843	-1.11223
	322	0.827154	0.743778	0.934583	1.08522	0.767389	0.846388	0.813416	0.948615	1.17937	1.05687	-0.119442	0.91188	0.700081	1.41347	2.65512	15.5773	12.5333	0.0110808	-0.0950299
	323	0.838161	0.748352	0.931366	1.04995	0.763101	0.824983	0.807288	0.940349	1.18325	1.41896	-0.535582	1.08194	0.576547	1.32077	2.32483	8.88537	19.5161	0.0108856	0.50457
	324	0.828977	0.795829	0.933199	1.09117	0.829968	0.831291	0.883326	0.926481	1.0906	0.936821	-3.1341	0.703211	1.83388	1.04618	2.47142	2.2046	9.11346	0.0727579	-0.257075
	325	0.800992	0.723473	0.931785	1.10848	0.754958	0.808869	0.787579	0.937865	1.20313	1.02294	0.613619	1.58351	0.404166	1.22077	4.42785	15.0518	6.57212	0.00236006	-0.860754
	326	0.846739	0.790852	0.933616	1.06363	0.81215	0.803422	0.776836	0.938067	1.2144	1.0747	-2.19502	1.11093	1.46728	2.47558	1.91519	12.2187	12.0241	0.0661425	-0.248396
	327	0.834053	0.744562	0.937608	1.08203	0.766276	0.844185	0.909398	0.927652	1.05454	1.37724	0.37504	2.10412	0.329628	0.987959	2.41743	2.30649	7.29083	0.0142385	-0.287287
	328	0.819777	0.773215	0.930259	1.09339	0.80546	0.829271	0.914918	0.915848	1.01255	1.03741	-3.71773	0.647491	1.55325	1.72248	2.13696	13.2362	12.378	0.0751053	-1.08096
	329	0.801052	0.723513	0.937376	1.11868	0.758259	0.846646	0.882324	0.934615	1.09784	0.969948	-0.985481	0.915422	0.389269	0.915551	3.13915	12.7574	16.9832	0.0935644	-0.0824026
	330	0.848932	0.816035	0.929093	1.04857	0.837347	0.846331	0.861315	0.938614	1.12436	1.13145	0.333405	0.739436	2.04696	1.5382	1.49779	13.5224	7.67781	0.032986	0.444631
	331	0.820331	0.749326	0.935143	1.09827	0.778699	0.888723	0.942309	0.945701	1.01949	1.00366	-0.665462	0.761333	0.521414	1.08934	1.66223	9.66879	19.8283	0.0767405	0.438361
	332	0.840261	0.777833	0.93258	1.06876	0.799789	0.802568	0.815584	0.928041	1.1698	1.23614	-0.109793	0.854419	0.704049	0.852468	3.0731	6.5178	9.39581	0.0449558	0.149713
	333	0.848458	0.79113	0.937198	1.07218	0.814332	0.819049	0.697364	0.965227	1.30063	0.891635	3.54072	1.10723	2.40966	2.15662	1.83116	9.40284	15.4384	0.0611624	0.522789
	334	0.808649	0.716929	0.930976	1.09424	0.742155	0.842343	0.843572	0.940366	1.14462	1.38398	2.86599	1.10114	0.312734	2.19996	3.83502	17.8919	17.1603	0.0761416	0.228298
	335	0.829268	0.762104	0.937918	1.0958	0.791284	0.823411	0.774785	0.947303	1.21896	0.895919	-1.3871	1.06604	0.978946	1.28166	2.64797	13.5912	7.69099	0.0159165	-0.272727
	336	0.820185	0.736227	0.93202	1.08687	0.760398	0.825005	0.912818	0.913844	1.01334	1.47075	2.13002	0.850714	0.490432	1.2471	2.85521	5.35623	19.897	0.0905988	-0.909894
	337	0.833558	0.74157	0.935162	1.074	0.761031	0.823613	0.836928	0.932952	1.14865	1.41555	2.36471	1.60718	0.406391	0.692144	2.91995	19.9769	17.1059	0.084913	0.0905489
	338	0.808791	0.725165	0.930894	1.0971	0.752351	0.814079	0.788403	0.939937	1.20289	1.07091	3.01218	0.926841	0.65613	1.99936	3.55115	12.9587	13.204	0.0144004	-0.776262
	339	0.837841	0.758133	0.934783	1.07258	0.77869	0.824637	0.874583	0.925044	1.10055	1.36624	-3.32921	1.4365	0.433166	0.965686	2.74116	7.86864	7.44956	0.0287152	-0.0859369
	340	0.806353	0.730087	0.935781	1.1116	0.762775	0.831309	0.91481	0.917891	1.0227	1.14885	-1.3416	1.0262	0.352113	1.63267	3.05937	3.33759	11.7279	0.0924964	-0.392691
	341	0.832694	0.738804	0.936479	1.07839	0.759077	0.81932	0.775986	0.945293	1.21723	1.19053	2.86513	1.79746	0.390508	1.60743	2.79604	19.5507	12.018	0.0487186	0.567355
	342	0.840344	0.748819	0.937604	1.07188	0.767551	0.826879	0.858675	0.929765	1.12264	1.39875	-2.40181	2.34077	0.335539	1.24927	2.40227	4.33487	10.9229	0.0763258	0.638019
	343	0.806217	0.731064	0.93391	1.10845	0.762942	0.844177	0.791543	0.952436	1.20296	0.89983	-3.18026	0.635313	0.651373	1.47297	3.55686	15.1529	19.6245	0.0701622	0.369447
	344	0.837725	0.768655	0.935989	1.08048	0.792765	0.805369	0.78441	0.93707	1.2062	1.08791	2.86692	1.09999	0.576687	0.921123	2.88118	19.9832	7.00261	0.0368268	0.392763
	345	0.823093	0.817308	0.92991	1.09169	0.858376	0.803121	0.898669	0.905885	1.03756	0.918403	-2.2644	1.03273	1.00632	1.89093	2.45237	7.90502	1.03169	0.0852386	-0.0951795
	346	0.835358	0.853024	0.922177	1.05478	0.887995	0.812228	0.90575	0.908521	1.02268	1.06987	1.44427	0.801819	2.41757	1.26348	1.67844	9.31005	1.39194	0.0124332	0.104362
	347	0.820842	0.750901	0.936124	1.1001	0.781025	0.843713	0.921565	0.921668	0.995975	1.06714	2.23906	1.4314	0.399593	2.13479	1.61585	17.7151	6.80389	0.0450642	-0.264969
	348	0.80768	0.789136	0.929325	1.10629	0.832156	0.823667	0.881547	0.907846	0.925576	0.915285	-3.25148	0.850091	0.689422	2.44932	2.52322	5.87059	1.62318	0.00531997	-0.454453
	349	0.83577	0.767945	0.932047	1.07212	0.790167	0.800526	0.850751	0.918391	1.12496	1.47657	3.09923	1.0903	0.427675	0.812753	3.57904	16.9476	6.22064	0.0735587	0.116533
	350	0.807348	0.723506	0.93032	1.09725	0.750729	0.808553	0.78716	0.937788	1.20354	1.14495	-0.176586	1.06384	0.406714	1.73688	3.95397	14.4991	11.5665	0.0349035	-0.0472442
	351	0.828212	0.738518	0.934507	1.08084	0.760109	0.823092	0.836828	0.932726	1.14866	1.45878	0.910276	2.16097	0.302668	1.89897	3.57029	5.70191	8.32482	0.0706747	0.270144
	352	0.84056	0.768322	0.937954	1.08108	0.79203	0.820476	0.724188	0.958733	1.27271	0.913525	-2.75883	1.45927	1.62035	1.07786	1.79404	18.903	17.8523	0.0616046	-0.555588
	353	0.827054	0.817735	0.929306	1.08596	0.855661	0.854216	0.919111	0.930962	1.04215	0.888813	-1.55638	1.00025	2.41076	2.18586	1.56469	8.7896	2.46991	0.0127386	-0.481433
	354	0.8177	0.729342	0.934226	1.09342	0.754641	0.835864	0.889418	0.914499	0.929872	1.37161	0.922672	1.53576	0.357829	0.757572	1.5276	16.7804	17.9555	0.050587	-0.758056
	355	0.820807	0.774931	0.934421	1.10105	0.809882	0.82512	0.91251	0.91253	0.998149	1.07116	3.36109	0.975002	0.388899	1.23105	3.57613	18.3364	2.29746	0.00228074	-0.0215301
	356	0.82408	0.766648	0.93053	1.08692	0.794886	0.823593	0.884233	0.922225	1.08575	1.06466	3.14135	0.992038	1.80824	1.94232	1.99407	2.14512	10.9543	0.0148565	-1.90174
	357	0.842803	0.7602	0.935767	1.06627	0.778672	0.813103	0.816015	0.932874	1.1713	1.24857	0.423589	1.70261	0.510749	2.46396	2.21814	18.2465	6.94796	0.0251097	-0.000481515
	358	0.835675	0.759939	0.93081	1.06429	0.7793	0.853613	0.912222	0.932237	1.0558	1.51922	0.0431024	0.599985	0.62037	1.82427	2.76731	2.55027	16.4249	0.0514031	-0.0838175
	359	0.825963	0.730921	0.936032	1.08542	0.752987	0.865929	0.927855	0.935698	1.03271	1.6256	-0.598452	1.17137	0.303389	0.562492	3.06963	12.1139	16.6017	0.0558307	0.00932949
	360	0.823923	0.775812	0.933913	1.09648	0.808727	0.829665	0.895594	0.911562	0.944507	1.21687	1.36226	0.776626	0.347913	1.21152	2.67051	4.23761	2.88702	0.0332788	0.303285
	361	0.839844	0.768688	0.933794	1.07	0.789709	0.802146	0.901366	0.901382	1.00178	1.50659	2.90126	1.8537	0.416096	2.41759	2.09546	18.2816	4.25417	0.0586406	-0.574008
	362	0.821305	0.749072	0.927838	1.07885	0.772976	0.865986	0.907841	0.939689	1.06968	1.09378	2.32917	0.89804	1.59237	2.40165	1.52522	10.0251	19.9697	0.00696996	-1.43016
	363	0.822797	0.747214	0.937878	1.10038	0.776473	0.838138	0.789846	0.950171	1.20416	0.901273	-0.592886	1.0332	0.821507	1.99534	2.52348	9.88552	17.8595	0.0684223	-0.147738
	364	0.82264	0.733282	0.929149	1.07245	0.753282	0.83206	0.77354	0.951365	1.22118	1.3339	0.490713	0.709783	0.48264	2.24875	3.78146	5.61325	16.8909	0.0219803	0.616216
	365	0.804188	0.716639	0.935946	1.11061	0.747106	0.815671	0.876627	0.919886	1.09382	1.13684	-0.265351	1.54065	0.367444	0.665916	3.23317	8.5612	15.608	0.0678417	-0.873013
	366	0.83663	0.766873	0.934551	1.0777	0.790175	0.800757	0.6868	0.960899	1.31075	0.936932	1.58284	0.761006	1.84302	1.37473	3.01186	14.5493	19.7396	0.0487543	0.557914
	367	0.847843	0.809864	0.933924	1.06753	0.834999	0.832905	0.788044	0.94828	1.20555	0.96448	-3.54137	0.86117	2.42169	2.28638	2.01165	8.18204	10.2573	0.0850008	0.464953
	368	0.839286	0.763794	0.930756	1.05694	0.781467	0.841908	0.863678	0.936005	1.12037	1.56605	1.75904	0.633662	0.610539	0.736608	3.12934	15.693	16.9857	0.0636277	0.300197
	369	0.824059	0.761616	0.929086	1.08196	0.78768	0.873484	0.924435	0.93505	0.961379	1.1573	-1.16824	0.565834	0.824489	0.88141	1.60637	1.27006	17.55	0.0243699	-0.278468
	370	0.830625	0.779187	0.934961	1.09086	0.809544	0.855336	0.860964	0.943	1.12681	0.93023	-0.123022	0.711401	2.15586	1.01882	2.26719	5.21794	18.2396	0.0885072	-0.30332
	371	0.839712	0.786193	0.932178	1.07124	0.810164	0.824952	0.810835	0.939459	1.17921	1.04952	0.594852	0.91107	2.45538	2.4501	2.15442	3.72111	12.3654	0.0317903	-0.768602
	372	0.830188	0.752505	0.933102	1.07948	0.775365	0.81053	0.904933	0.90778	1.02309	1.56992	2.7324	1.25425	0.397796	1.90034	2.96809	17.5244	7.66666	0.0899204	-0.559244
	373	0.831142	0.791628	0.931281	1.08348	0.821879	0.825516	0.887739	0.909034	0.934216	1.29283	-0.548174	0.71012	0.402607	0.888749	2.6478	19.3165	1.34956	0.020479	0.294104
	374	0.828409	0.740896	0.936158	1.08613	0.764116	0.816815	0.892574	0.916554	1.06765	1.38561	-2.29547	1.02857	0.328979	1.16336	2.40162	16.0496	16.0142	0.0914187	0.742738
	375	0.835827	0.767941	0.936672	1.08509	0.793602	0.821057	0.90796	0.909337	0.98414	1.24677	-3.08495	2.2981	0.352745	0.72483	1.87302	1.38571	5.60102	0.0840125	-0.0736563
	376	0.836818	0.768031	0.936912	1.08421	0.793268	0.836247	0.814791	0.943718	1.17645	0.998748	1.81312	1.01135	0.879193	0.992937	2.10506	9.26918	19.1614	0.0923384	0.0767306
	377	0.832808	0.730284	0.937454	1.07622	0.748952	0.807936	0.756247	0.945311	1.23754	1.18507	2.50879	2.92115	0.387487	0.973612	2.64954	8.06044	12.1025	0.0236739	0.0219019
	378	0.819404	0.716315	0.932804	1.08022	0.736321	0.873434	0.904811	0.944089	1.07704	1.59847	2.05671	1.01352	0.326324	1.04264	3.12261	5.75384	19.3245	0.0061161	-0.246494
	379	0.826754	0.744146	0.930821	1.07534	0.765481	0.844069	0.910386	0.927317	1.05242	1.51951	-3.25378	0.737625	0.503101	1.26035	3.1554	2.31654	18.4761	0.0668952	-0.326153
	380	0.800307	0.700448	0.932391	1.10233	0.726706	0.858276	0.821344	0.952291	1.17217	1.12852	-3.28593	1.12485	0.318199	0.695824	3.65564	4.5569	19.5632	0.00355126	0.135019
	381	0.818826	0.769306	0.933568	1.10084	0.803437	0.806484	0.814049	0.930207	1.17236	0.936757	3.54543	0.805905	1.61621	1.49983	3.12216	13.4839	7.90003	0.03644	-0.99161
	382	0.838348	0.771015	0.931557	1.06649	0.791844	0.864466	0.824754	0.954334	1.16919	1.0564	1.26652	0.666034	2.6413	0.891076	2.1824	16.2555	17.0991	0.0113197	-0.150383
	383	0.835457	0.767581	0.933135	1.0759	0.790747	0.802694	0.699297	0.958219	1.29779	0.962342	-1.8242	0.643214	2.1533	1.31185	3.31877	16.5884	16.9578	0.0422446	0.53098
	384	0.802656	0.723109	0.935918	1.11422	0.756041	0.839833	0.920145	0.921026	1.01183	1.17016	-2.06714	0.937885	0.328674	1.00577	3.19	1.3636	13.1162	0.0600965	-0.412669
	385	0.837249	0.764326	0.932341	1.06854	0.784904	0.814716	0.819848	0.932665	1.16709	1.11365	0.2529	1.49087	1.25797	1.06749	1.56642	14.6137	11.2148	0.0108047	-1.52926
	386	0.833566	0.746255	0.936419	1.08027	0.767835	0.853316	0.924377	0.928949	1.0259	1.27565	1.62059	2.33628	0.355424	1.08347	1.393	11.4236	14.0955	0.0844161	0.0953157
	387	0.817664	0.746501	0.927396	1.08288	0.771699	0.820167	0.810478	0.908809	0.83386	1.54006	-1.07219	0.595249	0.506809	2.07049	1.46774	4.34205	14.9156	0.0314683	-1.10439
	388	0.841427	0.790801	0.927746	1.05284	0.810918	0.815561	0.839542	0.928547	1.14367	1.32662	3.24319	1.16626	0.885469	1.32144	2.87053	13.525	7.54011	0.00121404	-0.831773
	389	0.82114	0.721835	0.933349	1.08181	0.742627	0.835153	0.849713	0.935711	1.13584	1.49825	-2.67908	0.746028	0.307519	1.76726	3.22255	12.1442	17.9834	0.0248876	0.880649
	390	0.834215	0.756705	0.93404	1.07666	0.778719	0.820575	0.854195	0.927665	1.1266	1.20862	-3.28409	0.921929	0.519964	1.08243	2.34983	6.15665	16.3989	0.0629188	0.631283
	391	0.814171	0.72804	0.936661	1.10326	0.75651	0.810987	0.809514	0.933429	1.17847	1.00973	2.19672	1.58368	0.546041	1.76906	2.82152	3.90169	15.812	0.0684978	-0.941139
	392	0.822337	0.737256	0.935993	1.09372	0.763032	0.837508	0.917486	0.918107	0.9899	1.32356	2.59006	1.96199	0.32315	2.73365	2.16142	2.54366	6.54036	0.0155586	-0.736425
	393	0.808999	0.719018	0.929767	1.09172	0.743865	0.81034	0.900907	0.903383	0.977986	1.61368	-2.49461	0.739863	0.468031	0.714324	3.42494	3.85411	18.3501	0.026588	-1.78314
	394	0.829615	0.765051	0.935595	1.09076	0.793079	0.842417	0.754922	0.960158	1.24182	0.887507	-0.416546	0.586187	1.58269	2.22814	3.05279	17.2174	17.4729	0.0968238	0.674746
	395	0.832444	0.778819	0.933227	1.08414	0.806653	0.813312	0.891296	0.914805	1.06752	1.11351	2.74837	0.998868	0.786499	1.76695	1.98499	16.2984	8.84266	0.087378	-0.542202
	396	0.823056	0.772105	0.933673	1.09645	0.804466	0.810798	0.801043	0.935385	1.18817	0.947319	-3.3047	0.767376	0.644231	1.52488	3.58677	15.2576	4.16587	0.0360867	0.487629
	397	0.818296	0.782843	0.933106	1.10208	0.820384	0.804252	0.834632	0.924142	1.14694	0.898844	-3.06922	0.637568	2.526	0.456437	3.47383	13.6523	8.11626	0.0523464	-0.656529
	398	0.832176	0.761479	0.936664	1.08871	0.787841	0.817844	0.836034	0.930419	1.14847	1.07709	-2.92911	1.38556	0.474488	0.842111	2.95967	3.35731	5.22303	0.0110488	-0.0909369
	399	0.841441	0.77747	0.929765	1.05496	0.796121	0.866746	0.833326	0.953682	1.16011	1.09609	0.508822	0.867653	1.41115	1.51301	1.34546	9.07506	17.4923	0.0155028	0.410545
	400	0.817122	0.744285	0.93123	1.09246	0.77172	0.822953	0.796849	0.941846	1.19465	1.07103	-2.82003	0.663511	0.658408	0.731314	3.74684	8.96352	19.4121	0.0781409	0.174562
	401	0.819785	0.733568	0.936128	1.09639	0.759966	0.803258	0.818223	0.927834	1.16684	1.10872	0.839256	0.882756	0.318015	2.16455	2.93475	8.65862	9.10262	0.0145432	1.07039
	402	0.839098	0.78832	0.92607	1.05035	0.808148	0.842703	0.899756	0.928956	1.07072	1.23856	2.16811	0.787299	1.7817	1.10282	1.26321	18.2747	17.8908	0.0357146	-0.418972
	403	0.810215	0.724918	0.937918	1.10974	0.755514	0.883014	0.89705	0.950166	1.09009	0.971871	0.0136763	0.889336	0.375323	2.01631	2.46304	7.40324	16.5489	0.0388218	0.482647
	404	0.82362	0.733488	0.92969	1.07225	0.753292	0.826669	0.776629	0.94829	1.2173	1.17071	-2.67986	0.852699	0.876923	2.46825	3.05541	17.6769	19.1884	0.00832631	-0.411666
	405	0.827009	0.760398	0.934638	1.09099	0.788203	0.833689	0.915952	0.916322	0.99212	1.27532	-2.10375	0.933425	0.397358	1.30013	2.5588	3.76393	7.31008	0.057039	-0.022326
	406	0.801433	0.715939	0.935835	1.11343	0.747599	0.834052	0.825367	0.940409	1.16415	1.00278	2.38793	1.26457	0.333836	1.51179	3.49509	6.20494	14.8805	0.0570884	0.111779
	407	0.835237	0.748539	0.933516	1.06873	0.76743	0.802601	0.787672	0.935017	1.20214	1.25865	-2.49199	1.47176	0.561777	2.85269	2.66695	18.9965	15.1039	0.0783515	-0.0146933
	408	0.837662	0.784046	0.928943	1.06395	0.806356	0.84433	0.912602	0.926901	1.0479	1.25751	3.57779	0.608653	1.1652	0.39853	2.05705	13.346	13.088	0.0224699	-0.398773
	409	0.806481	0.71191	0.93436	1.10282	0.73901	0.827942	0.802794	0.942719	1.1887	1.04238	-2.14424	1.3657	0.442604	1.1822	3.20596	18.8267	15.9789	0.0219162	-0.46505
	410	0.812685	0.723925	0.936038	1.10251	0.751772	0.853692	0.842414	0.945941	1.14802	1.08655	-1.18448	1.10056	0.323655	1.71198	3.2265	5.56339	17.5421	0.0843189	0.733503
	411	0.816001	0.765144	0.9376	1.11104	0.802683	0.818117	0.894001	0.916776	1.06565	0.915742	2.72429	1.19115	0.681215	1.45664	2.28612	7.28546	6.19501	0.0798489	-0.865428
	412	0.841471	0.772708	0.928315	1.04283	0.788604	0.828105	0.782347	0.947557	1.21124	1.28487	-3.55739	0.863786	1.10017	2.36256	2.38797	14.0312	12.2605	0.00445903	0.139869
	413	0.829279	0.738802	0.931524	1.06923	0.75763	0.809145	0.782548	0.939201	1.20878	1.39019	0.454002	1.31623	0.448722	2.1948	3.39578	9.41414	14.7713	0.047758	0.238212
	414	0.83989	0.781488	0.935416	1.07904	0.806794	0.843854	0.80062	0.950238	1.19307	0.960338	-0.33995	0.763624	2.08464	1.16107	2.23496	17.5297	16.7732	0.0616108	0.0656145
	415	0.807241	0.724482	0.93683	1.11104	0.75589	0.832436	0.893393	0.924892	1.07566	1.1228	1.68181	1.52345	0.305676	2.38192	3.15739	7.02429	8.31706	0.0486635	-0.315824
	416	0.833858	0.770245	0.934188	1.08235	0.795857	0.84325	0.807636	0.948413	1.18532	0.974249	-1.43354	0.929079	2.95763	1.24422	2.11479	18.8561	19.9519	0.050338	-0.9117
	417	0.818838	0.731125	0.927476	1.07378	0.751825	0.802807	0.830298	0.924553	1.15201	1.48462	-1.1071	0.979038	0.536782	2.35205	3.70915	15.3292	15.0311	0.0400171	-0.777253
	418	0.805475	0.733492	0.936418	1.11455	0.767919	0.862892	0.929667	0.933284	1.02226	0.944308	2.20514	0.983133	0.5328	1.68019	1.94377	13.3189	11.2849	0.026676	-0.710112
	419	0.838952	0.772772	0.935902	1.07948	0.797006	0.841725	0.84246	0.940301	1.14579	1.04745	-2.44035	0.956272	0.838233	0.42025	2.1492	9.27853	18.2769	0.0624067	0.148456
	420	0.830926	0.751315	0.933108	1.07766	0.773421	0.816115	0.813633	0.934775	1.17458	1.0832	-1.05356	1.47579	1.22653	2.16135	1.7548	15.8691	13.5772	0.0218988	-1.71961
	421	0.845892	0.832924	0.93101	1.06472	0.862281	0.807066	0.827729	0.927205	1.15614	0.983153	-2.01383	0.78982	2.72877	1.17575	1.99796	9.88795	4.60692	0.051792	0.554816
	422	0.832712	0.776152	0.932414	1.08103	0.802583	0.843917	0.872213	0.935325	1.11021	1.10403	-2.76227	0.572195	0.609544	2.60502	2.68991	7.67498	7.9439	0.0634418	1.01057
	423	0.838159	0.775601	0.937469	1.08561	0.802223	0.800484	0.83146	0.923124	1.14999	1.00791	0.00424389	2.22658	0.647783	2.03693	2.2973	15.5152	2.12486	0.0753816	-0.967165
	424	0.839878	0.769629	0.932602	1.06623	0.7899	0.827535	0.888915	0.923271	1.08033	1.47358	-2.16714	0.923273	0.505158	1.35863	2.87907	7.28886	10.4649	0.0953372	0.205368
	425	0.822956	0.739873	0.936509	1.09494	0.766288	0.823443	0.799564	0.941443	1.19169	1.00437	-1.59273	1.28037	0.603628	1.60404	2.76967	2.44639	13.4172	0.0286769	-0.390138
	426	0.822979	0.743034	0.934387	1.09099	0.768813	0.81581	0.844242	0.927533	1.13787	1.21696	1.24306	1.20773	0.407775	0.945008	3.34554	10.8805	8.46934	0.0340614	-0.162357
	427	0.842964	0.79537	0.926778	1.04564	0.814449	0.837037	0.874382	0.931412	1.10524	1.28073	1.23969	1.14428	1.0154	1.53833	1.5526	12.2089	7.03729	0.00336581	-0.447754
	428	0.850684	0.783445	0.931725	1.03544	0.797569	0.809614	0.801077	0.934867	1.18796	1.44565	-1.37123	1.25294	0.714555	2.27536	1.99512	7.26704	10.432	0.0343228	0.541338
	429	0.844235	0.829124	0.932207	1.07057	0.859921	0.831597	0.818018	0.940881	1.17211	0.90067	1.95168	0.844269	2.83099	2.4215	1.76916	15.1774	3.53175	0.0437087	0.832744
	430	0.844318	0.781786	0.937138	1.07661	0.805585	0.844481	0.797244	0.951298	1.19682	0.953715	-1.74423	1.09197	0.878573	2.10698	1.8213	10.0569	7.55514	0.0248212	0.585009
	431	0.846107	0.809393	0.930768	1.06024	0.832939	0.802654	0.860776	0.916997	1.11178	1.19893	1.34697	1.12672	0.830778	1.42779	2.287	8.25466	2.81911	0.00740264	-0.23412
	432	0.843127	0.746314	0.935075	1.05025	0.759966	0.818026	0.79868	0.93924	1.19193	1.56266	0.732848	2.23394	0.436659	1.23636	2.48532	16.0933	16.2213	0.0563258	0.373846
	433	0.849782	0.785821	0.932724	1.04927	0.802721	0.802805	0.751796	0.944256	1.24186	1.19371	0.448711	0.997801	1.11755	1.57718	2.20838	7.03465	12.7926	0.0294252	0.389444
	434	0.835114	0.765554	0.934248	1.07901	0.789288	0.844169	0.810685	0.948204	1.18209	1.04534	-3.14515	0.768596	0.857929	1.57523	2.61418	12.3873	13.867	0.0476679	0.426241
	435	0.830678	0.774626	0.930502	1.07876	0.800599	0.846942	0.923069	0.924976	1.01702	1.20291	-0.479696	0.540352	0.925052	2.09316	2.19206	10.8035	12.0594	0.0626222	-0.315292
	436	0.812322	0.773807	0.934711	1.11049	0.813741	0.800128	0.886405	0.908595	1.06745	0.921378	0.490359	1.14711	1.02323	2.08986	2.53591	17.4576	3.83511	0.0961095	-1.49462
	437	0.836888	0.758125	0.93338	1.06988	0.778229	0.808383	0.821423	0.929373	1.16402	1.20148	-2.42605	1.37423	0.711448	2.64988	2.24068	11.0538	10.1647	0.0277627	-0.609298
	438	0.816612	0.730914	0.941037	1.10992	0.76157	0.844604	0.862114	0.937683	1.123	0.972684	2.77711	1.7151	0.316145	0.535603	2.55284	11.2956	12.4455	0.0592859	0.320586
	439	0.843477	0.783499	0.933974	1.06899	0.805697	0.872646	0.911047	0.9343	0.940031	1.58473	-0.13492	1.13282	0.308287	0.814102	2.46955	1.75775	3.15751	0.00285097	0.292018
	440	0.82141	0.755049	0.937092	1.10235	0.786533	0.880969	0.929124	0.943969	1.0434	0.959392	2.07643	0.838295	0.439455	1.93082	1.90431	18.285	9.04515	0.0553205	0.700397
	441	0.835826	0.762332	0.931372	1.06728	0.782631	0.822824	0.821935	0.935955	1.16615	1.18203	1.27961	0.860666	1.21411	0.845336	2.45038	9.02407	19.1419	0.0202096	-0.640917
	442	0.82235	0.783357	0.937607	1.10635	0.821868	0.827163	0.901684	0.919868	1.05696	0.887156	2.72077	1.0989	0.56852	1.69253	2.14934	11.6975	3.90326	0.0973507	0.141962
	443	0.84431	0.793281	0.935113	1.07376	0.818117	0.812981	0.712834	0.958684	1.28418	0.918553	0.104747	0.754436	2.91026	2.2035	2.85458	3.73157	11.3465	0.0503114	0.666507
	444	0.851293	0.799001	0.931043	1.04313	0.816192	0.827946	0.8054	0.942107	1.18579	1.20579	-1.1474	0.963756	1.19049	1.65899	1.66061	13.4957	8.16903	0.0180193	0.45688
	445	0.848042	0.806103	0.9357	1.07185	0.831779	0.807209	0.794541	0.935385	1.19503	0.957787	2.05313	1.1981	0.833417	2.35597	1.75755	3.16196	4.16109	0.027287	0.893862
	446	0.83985	0.761499	0.930643	1.05283	0.778005	0.814091	0.827202	0.930684	1.15829	1.39316	-3.17873	1.17353	0.723641	2.20008	2.36967	3.06665	19.048	0.0556327	-0.11998
	447	0.837	0.761392	0.930719	1.06148	0.780104	0.860221	0.870441	0.943587	1.11663	1.32374	-0.788584	0.605351	0.802621	2.20877	2.52607	11.1859	12.948	0.0153954	0.043601
	448	0.840248	0.766472	0.933391	1.06673	0.78635	0.82422	0.733048	0.957989	1.26363	1.01878	-0.323892	1.31576	2.42606	1.64012	1.7566	16.0826	17.3568	0.0166078	-1.02772
	449	0.834259	0.833971	0.926822	1.0707	0.868805	0.853256	0.881538	0.938048	1.10097	0.940697	-3.71071	1.69315	2.97825	2.13494	1.97843	1.02236	1.77335	0.00229078	-1.10947
	450	0.831711	0.742852	0.939153	1.08934	0.766672	0.83409	0.84101	0.937032	1.14599	1.17224	3.53982	2.24105	0.323618	1.20557	2.73596	4.64356	9.61865	0.0773518	0.417957
	451	0.837799	0.786608	0.934379	1.08073	0.813685	0.831872	0.791103	0.94714	1.2021	0.970877	-0.752418	0.695847	1.26281	1.07154	3.06843	4.1013	6.45262	0.00961173	0.323207
	452	0.838935	0.768315	0.938518	1.08517	0.793495	0.825826	0.70493	0.965918	1.2931	0.887799	1.60697	1.54981	2.51179	0.451235	1.89987	11.6941	18.6835	0.0238825	-0.869025
	453	0.837027	0.781516	0.935053	1.08255	0.808419	0.808918	0.736557	0.950759	1.2588	0.935753	3.34854	0.772632	2.41187	1.09787	2.87865	16.5537	16.6316	0.0811607	0.0552397
	454	0.806323	0.737917	0.934386	1.11088	0.771771	0.823678	0.880187	0.923237	1.09199	0.997848	2.72663	0.814298	0.794226	1.06113	2.88042	14.1298	14.6516	0.0470056	-1.22082
	455	0.844402	0.769366	0.929926	1.03527	0.783119	0.801186	0.756726	0.942316	1.23634	1.47563	3.68425	1.19357	0.637854	1.68116	2.61805	16.8519	10.2413	0.0031964	0.502266
	456	0.84462	0.796808	0.933182	1.06819	0.820635	0.834433	0.818829	0.94202	1.17164	1.05731	-2.16703	0.85683	0.989336	2.93263	2.43756	17.9863	3.61452	0.0101015	0.370905
	457	0.839966	0.771296	0.926949	1.03758	0.786559	0.857249	0.915109	0.93362	1.05292	1.61781	2.75219	0.626559	0.883804	2.41078	1.77602	11.3293	18.832	0.0221436	-0.0275454
	458	0.830729	0.736108	0.938056	1.08517	0.758034	0.853949	0.850988	0.944345	1.13823	1.09508	3.20217	2.20682	0.390815	1.36817	1.71266	9.59922	18.3608	0.0684467	0.268573
	459	0.814247	0.743715	0.932509	1.09904	0.773467	0.842234	0.887481	0.931292	1.0891	1.02253	1.68013	0.730655	1.35352	1.07567	2.61454	10.8979	14.8791	0.0140716	-1.46808
	460	0.81251	0.721924	0.927728	1.08186	0.744263	0.816216	0.795557	0.939154	1.19518	1.44104	2.31632	1.12521	0.377044	1.11065	4.15836	8.9868	17.968	0.0493823	0.0676538
	461	0.843243	0.82291	0.924881	1.04635	0.846475	0.803032	0.882876	0.897427	0.943459	1.54457	3.54349	1.02365	0.542488	1.56877	1.80679	4.82252	1.53655	0.0353414	0.405131
	462	0.801848	0.705924	0.934754	1.10743	0.734137	0.81391	0.904547	0.905762	0.984818	1.42967	3.65786	1.7703	0.321875	1.97647	2.75793	16.1734	16.287	0.0708274	-1.4323
	463	0.837936	0.819398	0.929883	1.07312	0.850487	0.841032	0.904046	0.927072	1.06236	0.999925	1.99041	0.619755	2.62366	1.74095	1.83856	13.5442	5.52637	0.0598004	0.175882
	464	0.833802	0.751853	0.930223	1.06163	0.769979	0.833319	0.877313	0.928867	1.09996	1.63886	1.91207	0.738045	0.562179	0.831187	3.26462	12.6907	17.6478	0.0520752	-0.270323
	465	0.846728	0.792072	0.929777	1.04753	0.810149	0.833991	0.91659	0.918921	1.01958	1.47104	0.249568	1.14651	0.536245	0.98216	1.37761	4.72439	6.34841	0.0182944	0.440405
	466	0.841348	0.782559	0.935463	1.07706	0.807186	0.820224	0.741868	0.954095	1.25402	0.949799	0.0467938	1.11429	2.62856	1.8461	2.18418	4.28539	13.4849	0.0334317	-0.576756
	467	0.85351	0.81875	0.929936	1.03965	0.83761	0.824298	0.782754	0.945764	1.21037	1.11556	-2.4884	0.940992	2.93888	1.52207	1.47638	10.1194	9.13621	0.0283553	0.394092
	468	0.814464	0.72676	0.93696	1.10308	0.754929	0.844831	0.914604	0.926697	1.04381	1.25861	-2.26088	1.34044	0.309605	1.0261	2.93205	16.1647	13.7098	0.0900661	-0.0966703
	469	0.835093	0.766941	0.926533	1.05152	0.784908	0.803201	0.817197	0.927928	1.168	1.60051	0.104561	0.616995	0.73022	1.62378	3.74712	19.1402	11.7542	0.0628205	-0.0613786
	470	0.8347	0.755541	0.930101	1.06123	0.77389	0.824411	0.885748	0.92233	1.08379	1.50915	-0.147451	0.774695	0.710026	1.23023	2.69841	17.3002	16.6726	0.040281	-0.632899
	471	0.828916	0.744226	0.934021	1.08084	0.76648	0.86797	0.838564	0.953263	1.15452	1.06812	2.0993	1.03573	0.572285	1.06216	2.10116	11.7704	14.6525	0.004038	0.298685
	472	0.824383	0.751975	0.936568	1.09675	0.780609	0.875303	0.894187	0.946809	1.09147	0.965645	-3.43417	0.884895	0.565844	1.27345	2.13212	7.52837	10.9255	0.0234635	0.306245
	473	0.838487	0.771379	0.937307	1.0836	0.796656	0.800247	0.687569	0.960467	1.30992	0.892959	2.4479	1.0751	1.5229	2.4384	2.51304	2.48374	19.6759	0.0833417	0.224919
	474	0.843046	0.789035	0.930898	1.06109	0.810267	0.800887	0.832034	0.923178	1.14937	1.17078	-0.941531	1.12576	1.49805	1.75265	1.72934	4.01123	15.7052	0.0818428	-0.867626
	475	0.816617	0.725241	0.934324	1.09363	0.750174	0.850533	0.886466	0.935786	1.09363	1.34243	3.54513	1.28981	0.321742	1.21836	3.30267	8.31399	9.36549	0.00953222	-0.349727
	476	0.842958	0.779313	0.939437	1.08435	0.805268	0.805869	0.790016	0.935897	1.19996	0.949693	2.96484	1.44448	0.630364	0.911778	1.96902	2.62307	8.28278	0.0519184	0.498655
	477	0.812026	0.70471	0.928382	1.07351	0.723117	0.826096	0.8019	0.942093	1.18945	1.60548	0.355246	2.11325	0.339821	0.537967	3.93471	17.6623	19.8344	0.00285907	-0.780324
	478	0.849197	0.788859	0.932794	1.05334	0.807078	0.813345	0.789949	0.939213	1.20106	1.16358	-0.540922	0.994281	1.28607	1.46954	1.83368	18.4506	13.7649	0.0470743	0.112593
	479	0.832409	0.756049	0.935828	1.08453	0.780346	0.816621	0.679112	0.969211	1.31941	0.885555	3.13423	0.998998	2.58698	1.23569	2.74354	11.3191	17.7919	0.00945828	-0.188492
	480	0.844363	0.787675	0.932317	1.06291	0.808838	0.810061	0.78855	0.938077	1.20218	1.11025	1.28476	0.892102	1.7462	1.11121	2.31321	1.66802	17.9151	0.0499803	-0.249591
	481	0.839805	0.791709	0.93648	1.08407	0.820324	0.835933	0.856061	0.934681	1.12826	0.978105	2.48009	0.993668	0.737931	1.43492	1.97694	19.6942	5.56664	0.0627616	0.508987
	482	0.81446	0.72332	0.93544	1.09857	0.749666	0.823632	0.883724	0.907907	0.929014	1.42359	-3.03231	1.72821	0.32661	1.06606	2.00508	19.0045	12.598	0.0441277	-1.06593
	483	0.81786	0.730813	0.937448	1.101	0.758445	0.885985	0.848735	0.959603	1.14577	0.899649	-3.11688	0.993753	0.600824	0.551886	2.11892	16.8692	18.6678	0.0115095	0.210649
	484	0.843364	0.841132	0.92847	1.06146	0.872151	0.811946	0.849277	0.924398	1.13039	1.00672	0.650804	1.56032	2.02816	1.26289	2.09821	18.2399	1.49102	0.00281547	-0.899206
	485	0.818063	0.762976	0.9317	1.09685	0.794729	0.822172	0.911192	0.911192	1.00018	1.38608	1.95779	0.575661	0.321452	1.43425	3.91116	12.3724	2.83638	0.0571593	0.203118
	486	0.839762	0.782807	0.934387	1.07674	0.8077	0.831526	0.862161	0.931205	1.11944	1.0362	-0.722878	1.18418	1.00787	1.72208	1.42779	13.3869	12.6418	0.0938875	-0.345813
	487	0.829735	0.76514	0.935377	1.09009	0.792959	0.819356	0.721546	0.958974	1.27542	0.905329	-1.83913	1.25125	2.66993	2.16724	2.69643	8.13441	9.10603	0.00810146	-1.22125
	488	0.802707	0.717743	0.936971	1.1146	0.749875	0.842973	0.800743	0.94989	1.19285	0.913083	3.47298	1.02447	0.369055	1.07093	3.40438	1.50687	18.598	0.0444274	0.540834
	489	0.827577	0.790903	0.935022	1.09624	0.826113	0.834733	0.87397	0.930257	1.10497	0.90618	0.527544	0.928241	2.37923	0.65697	2.08649	4.69838	12.6185	0.0808848	-0.898541
	490	0.833259	0.79195	0.934295	1.0878	0.823201	0.825987	0.875103	0.925572	1.1003	0.984672	1.21867	0.808664	1.23259	0.977584	2.23438	1.81515	11.243	0.0886115	-0.21476
	491	0.816227	0.747948	0.933572	1.09984	0.778304	0.824804	0.904276	0.910091	0.967144	1.25729	-0.126816	0.802546	0.437192	1.81094	2.53801	8.62127	10.5469	0.0940735	-0.539821
	492	0.814443	0.753855	0.931579	1.09926	0.7854	0.892825	0.945882	0.946188	0.994249	0.964514	3.74996	0.589071	0.859458	2.67857	1.45018	15.1945	18.5168	0.0592568	-0.0493693
	493	0.812686	0.766845	0.932176	1.1047	0.803027	0.829792	0.915233	0.915959	1.01107	0.970593	0.934344	0.628375	1.76567	1.04393	2.2873	9.75923	13.239	0.0652387	-1.29149
	494	0.83915	0.764249	0.932899	1.0663	0.783944	0.829122	0.834014	0.936201	1.15323	1.32348	-0.245547	0.897772	0.583384	1.36039	2.87953	5.58338	14.1353	0.0693375	0.405814
	495	0.839165	0.771183	0.933512	1.07145	0.793043	0.817839	0.909312	0.910371	1.01382	1.53925	-2.02449	1.2861	0.397286	2.07965	2.71779	7.19074	5.17743	0.0784628	-0.0405995
	496	0.850374	0.82638	0.926107	1.02902	0.845593	0.809985	0.840357	0.925581	1.14124	1.2846	-1.10193	0.762362	2.91975	0.875673	1.55501	14.8872	11.1221	0.0552305	0.317702
	497	0.834726	0.77737	0.936852	1.08938	0.806124	0.800338	0.724624	0.950373	1.27087	0.891892	0.606553	0.846768	1.56049	0.822021	3.04681	10.4982	12.3768	0.0489107	0.197011
	498	0.843164	0.778696	0.932866	1.06395	0.799056	0.818046	0.767424	0.946779	1.22641	1.07671	0.673036	0.902446	2.07421	1.33415	2.25963	7.49887	18.4749	0.0321988	-0.319055
	499	0.845731	0.773963	0.933289	1.05676	0.791625	0.823955	0.767118	0.949404	1.22732	1.09405	0.31467	1.23981	1.23609	0.530612	1.62285	16.5461	17.4209	0.0143475	-0.0878022
	500	0.8319	0.773056	0.933447	1.08418	0.800031	0.831767	0.866874	0.930309	1.11343	1.04186	-1.77984	0.829225	1.337	1.24391	2.22983	5.06735	15.263	0.0539584	-0.683098
	501	0.815777	0.741755	0.933548	1.09874	0.770815	0.807848	0.892619	0.91124	1.06043	1.21746	3.35769	0.989991	0.495768	1.06877	3.0021	11.1995	12.0052	0.0721536	-0.874834
	502	0.824983	0.779468	0.926947	1.07943	0.807674	0.803908	0.887944	0.898376	0.952787	1.25142	1.9208	0.762744	0.829854	2.19349	1.87972	2.72326	6.09497	0.0174082	-1.19725
	503	0.845562	0.777125	0.930966	1.04755	0.79349	0.828941	0.835547	0.935784	1.1514	1.35002	-3.46638	0.995783	0.785177	1.76503	2.05038	19.3218	11.0956	0.0313399	0.263465
	504	0.809602	0.740373	0.93192	1.10282	0.771528	0.820222	0.858515	0.926419	1.12085	1.1261	-1.3067	0.770086	0.43735	1.78986	3.78173	8.29719	10.5922	0.0938046	-0.0139428
	505	0.844455	0.814376	0.926762	1.04937	0.836737	0.827305	0.873174	0.926729	1.10352	1.13571	-0.177309	0.680199	2.2761	1.25507	1.37486	2.4817	14.2679	0.0782375	0.619839
	506	0.806293	0.727218	0.936885	1.11298	0.759871	0.802118	0.883871	0.910559	1.07407	1.08442	-2.92866	2.6092	0.315615	0.872547	3.42321	13.7273	4.13625	0.0637152	-0.966538
	507	0.802826	0.718567	0.939973	1.12007	0.752645	0.841887	0.837126	0.941505	1.15201	0.907032	2.62707	1.48268	0.332448	0.502842	3.07421	6.98472	17.2526	0.0710886	0.0494794
	508	0.840274	0.774127	0.929579	1.05543	0.792666	0.846323	0.831284	0.944756	1.15942	1.12042	-1.98332	1.17602	1.39242	1.52376	1.15816	11.6006	19.0423	0.0249572	-0.325466
	509	0.835098	0.753742	0.932332	1.06781	0.773137	0.803522	0.79511	0.933565	1.19382	1.41067	-1.82139	1.44823	0.410461	1.60342	3.50082	19.3299	7.37915	0.0583799	0.424841
	510	0.832012	0.764652	0.932093	1.07794	0.78857	0.885538	0.853352	0.958555	1.14067	0.990767	2.49879	0.648552	1.72244	1.98976	2.01271	5.94672	15.9568	0.00936635	0.0481475
	511	0.815513	0.73732	0.930704	1.09128	0.763637	0.8188	0.710634	0.961607	1.28681	0.933623	0.777553	0.730607	2.36007	1.26676	3.73571	17.5652	17.1744	0.00429236	-0.677344
	512	0.834526	0.75629	0.936305	1.08243	0.779674	0.865276	0.930585	0.934523	1.02305	1.35064	0.971952	1.04316	0.346866	1.17968	2.27816	17.3511	7.00696	0.0307317	0.4283
	513	0.823429	0.759392	0.930141	1.08502	0.786029	0.82012	0.853147	0.92758	1.12775	1.1252	1.48627	0.708432	1.19829	0.570159	3.24961	13.8487	10.0224	0.00598663	-1.25508
	514	0.838221	0.806745	0.935007	1.08457	0.838843	0.806512	0.832765	0.925699	1.14982	0.94685	1.03429	0.992387	1.1693	1.72616	2.29493	11.2457	3.33666	0.0333142	-0.062869
	515	0.851165	0.792664	0.93368	1.0539	0.811097	0.803586	0.714443	0.954435	1.2819	1.04989	0.685608	1.01382	2.78755	1.05074	2.00348	9.17956	18.6078	0.0350985	0.0939655
	516	0.844281	0.821681	0.925241	1.04484	0.844442	0.801387	0.875219	0.912615	1.08907	1.22163	0.430152	0.533619	2.62305	0.910013	1.77488	2.53147	9.2904	0.0422987	0.533359
	517	0.821063	0.725447	0.935687	1.09012	0.74876	0.87729	0.907141	0.94568	1.07531	1.35859	-1.06627	1.02942	0.316792	2.19204	2.85529	1.43895	18.7468	0.0428566	0.475337
	518	0.838934	0.754413	0.935554	1.07101	0.773907	0.833561	0.887061	0.926897	1.08609	1.62843	-3.13741	2.54661	0.303976	1.75934	3.18718	12.3501	5.29713	0.0910966	0.290509
	519	0.828616	0.758504	0.932634	1.08304	0.783468	0.812882	0.79815	0.937021	1.19177	1.09462	-3.2453	0.828759	0.777906	1.07238	3.16762	9.87485	16.952	0.0820449	0.00745652
	520	0.83057	0.806096	0.933392	1.09038	0.841907	0.832293	0.89723	0.923844	1.06901	0.903455	-0.764407	1.0598	1.45137	1.90814	1.48374	18.3583	4.3597	0.0697238	-0.42659
	521	0.849362	0.82931	0.925744	1.03285	0.84986	0.800136	0.841328	0.920586	1.13737	1.30736	2.7055	0.767109	1.32542	1.85285	1.74261	6.53575	4.32341	0.0193246	0.701268
	522	0.836543	0.773135	0.931297	1.0702	0.795502	0.831745	0.916215	0.916289	1.00353	1.3401	-0.89924	0.935316	0.602225	0.563411	1.9759	11.1714	7.33162	0.010834	-0.615177
	523	0.834288	0.779556	0.930778	1.07483	0.804539	0.807801	0.882212	0.8997	0.938243	1.60263	-1.50839	0.597056	0.489059	0.71672	2.93892	3.83326	6.89503	0.0924062	-0.349193
	524	0.838756	0.783703	0.935577	1.08177	0.810401	0.811742	0.905144	0.908661	1.02559	1.12364	3.04333	2.08424	0.445193	1.09505	1.56047	7.45985	3.67982	0.0825162	-0.12637
	525	0.818092	0.74774	0.935012	1.10045	0.777918	0.865236	0.918897	0.937251	1.05138	1.0479	-1.12453	0.605573	0.597392	1.15836	2.54112	10.0618	15.8307	0.0600355	0.00682259
	526	0.844297	0.802376	0.925146	1.03375	0.820242	0.80662	0.884451	0.912917	1.07595	1.46547	-3.65144	0.761512	1.48625	1.30875	1.88417	2.14928	14.2722	0.0488275	-0.353392
	527	0.849478	0.793491	0.929984	1.03897	0.809672	0.815812	0.837727	0.929044	1.14594	1.39943	0.14996	0.90753	0.947978	1.09498	1.94652	8.89079	14.1686	0.0560627	0.410109
	528	0.829903	0.730831	0.933954	1.07109	0.748929	0.851854	0.841751	0.945204	1.14846	1.31871	-0.963851	1.3122	0.436066	1.12647	2.43878	7.44226	19.7792	0.00920872	0.208757
	529	0.826269	0.751471	0.935501	1.09157	0.778138	0.865178	0.932857	0.933024	1.00474	1.3528	-2.02134	0.853225	0.306087	1.61194	2.96891	19.755	3.8943	0.0112427	0.168724
	530	0.838408	0.812172	0.924224	1.05301	0.836515	0.800107	0.889174	0.907723	1.06138	1.31293	-1.5485	0.688094	1.72837	0.738634	2.81363	3.97461	4.72188	0.0045703	-1.11486
	531	0.815283	0.770581	0.935754	1.10906	0.808657	0.84465	0.920168	0.924764	1.0267	0.892945	1.23615	0.760855	1.02907	0.989062	2.03757	5.75834	10.5541	0.064222	-0.571911
	532	0.836703	0.755035	0.93224	1.06441	0.773575	0.848072	0.861895	0.939373	1.12409	1.51126	-2.27193	0.837451	0.463586	1.35516	3.12991	16.0833	11.8544	0.0508125	0.46245
	533	0.833234	0.758625	0.935381	1.0829	0.782712	0.845676	0.830064	0.944702	1.16069	0.974429	2.57132	1.66757	0.932881	1.46076	1.28397	3.95385	14.9508	0.0421119	-0.879045
	534	0.841249	0.790559	0.938231	1.08612	0.819354	0.838259	0.86734	0.933415	1.11474	0.894615	-1.65556	1.90339	0.640422	0.878495	1.29237	12.6036	3.33424	0.0411504	0.0238854
	535	0.83562	0.756404	0.934538	1.07539	0.777807	0.822667	0.862024	0.926859	1.11699	1.32771	0.163482	1.11634	0.494037	0.981347	2.75566	14.0928	13.464	0.0800844	0.0291643
	536	0.844124	0.783948	0.933591	1.06656	0.80548	0.825056	0.877852	0.92454	1.09605	1.34453	-3.15125	1.34551	0.424256	0.869814	3.13334	19.6578	1.89992	0.00901567	0.276331
	537	0.825969	0.725752	0.933024	1.0733	0.744357	0.810387	0.805973	0.934015	1.18246	1.48684	-0.294729	2.17912	0.380173	1.15396	3.34036	15.5337	18.455	0.0916325	-0.159597
	538	0.842178	0.786149	0.933469	1.0707	0.809453	0.846646	0.895989	0.920331	0.933133	1.59592	0.434079	1.04818	0.309776	2.31197	2.39846	11.3668	1.7241	0.017004	0.428631
	539	0.80706	0.72105	0.933875	1.10437	0.749905	0.845942	0.813395	0.948431	1.17934	1.07796	2.67967	0.970846	0.328571	2.05332	3.71285	2.03982	15.783	0.0559037	0.683084
	540	0.839039	0.763415	0.9332	1.06721	0.783223	0.80908	0.798422	0.935219	1.19088	1.11432	1.12625	1.50174	1.16895	1.50799	1.51015	19.6748	17.1989	0.0479099	-1.11807
	541	0.83055	0.746391	0.929746	1.06445	0.764993	0.820872	0.908	0.909274	0.984743	1.61516	2.80329	1.04263	0.580311	0.48065	2.01289	10.6867	17.5935	0.0133841	-1.34006
	542	0.84657	0.795542	0.927257	1.0329	0.811774	0.8198	0.882651	0.920598	1.08641	1.53352	1.82608	0.775603	1.12876	1.09188	1.71656	19.5985	18.7036	0.096819	0.0514708
	543	0.806523	0.730044	0.938185	1.1158	0.764108	0.861017	0.924633	0.929124	0.974372	1.00257	-3.1522	1.18768	0.341953	0.822197	1.91904	7.84487	16.1513	0.0832009	-0.115546
	544	0.83512	0.760344	0.931451	1.06813	0.780695	0.806445	0.733521	0.950552	1.26185	1.10559	-1.64762	0.731053	1.15874	1.15308	3.26554	4.86416	18.9111	0.0257509	0.252221
	545	0.80487	0.717335	0.936615	1.1113	0.748018	0.847348	0.91761	0.92737	1.0389	1.1606	-1.52548	1.22102	0.324977	1.66341	2.82583	12.6605	16.8166	0.0944029	-0.324456
	546	0.819554	0.737678	0.927666	1.0765	0.759732	0.810216	0.792899	0.937112	1.19732	1.42481	2.94256	0.952057	0.415875	0.951033	4.21878	11.7222	8.90254	0.0168448	-0.037728
	547	0.819802	0.729259	0.933625	1.08864	0.752942	0.850847	0.849707	0.943131	1.13912	1.29747	0.460329	0.99498	0.363682	1.78751	3.34694	6.34895	17.2645	0.0607726	0.43134
	548	0.810097	0.722327	0.939685	1.11249	0.753403	0.860583	0.911318	0.936241	1.06164	0.975657	-0.591027	2.08955	0.317368	1.67897	2.19476	2.46705	8.0129	0.0133749	-0.414512
	549	0.82398	0.760693	0.935238	1.09648	0.790796	0.870262	0.862863	0.949744	1.1276	0.902704	-2.43361	1.00148	1.6164	1.64298	1.86642	2.30843	15.0875	0.024365	-0.873309
	550	0.826173	0.755472	0.936083	1.09418	0.783579	0.843367	0.917362	0.920283	0.978224	1.33063	3.59398	0.896182	0.340764	0.748912	2.54254	16.8844	5.78383	0.0276789	-0.089139
	551	0.812885	0.765313	0.937615	1.11423	0.804714	0.833622	0.906982	0.922208	1.051	0.91906	2.24186	1.09871	0.330576	2.94556	3.08493	17.8991	1.88506	0.0864324	0.635846
	552	0.838378	0.770005	0.938695	1.08692	0.796079	0.821396	0.743196	0.954252	1.2527	0.899241	3.2186	1.29178	1.11592	1.82904	1.97396	7.95276	16.7845	0.0978835	-0.0603178
	553	0.81373	0.73757	0.936341	1.10595	0.768502	0.821516	0.811538	0.937774	1.17789	0.951886	-2.52985	1.1499	0.51983	1.84099	3.08722	18.8015	9.3369	0.0436037	-0.223804
	554	0.850589	0.810523	0.928033	1.03278	0.827814	0.809203	0.813918	0.931512	1.17302	1.34741	0.584932	0.571889	2.71888	2.3879	2.32381	17.1877	12.0232	0.0691904	0.332959
	555	0.821578	0.741243	0.937944	1.10043	0.769745	0.834049	0.800904	0.945858	1.19159	0.948701	1.80282	1.1315	0.616583	0.836008	2.7364	1.65455	19.6471	0.050385	-0.109819
	556	0.83267	0.791836	0.932555	1.08448	0.822106	0.800061	0.822146	0.925274	1.16139	1.04777	2.25542	0.763059	0.670981	1.30908	3.35971	7.86727	3.72709	0.0500142	0.596954
	557	0.837646	0.74082	0.93746	1.07247	0.759145	0.835786	0.807282	0.945233	1.18477	1.17282	-2.21578	2.31237	0.407535	1.51667	1.95551	17.0786	16.4466	0.0743736	0.590346
	558	0.816032	0.734851	0.933301	1.09571	0.761893	0.819175	0.90727	0.908463	0.985174	1.26733	0.559696	1.12979	0.483588	1.92254	2.06736	14.1948	13.8278	0.0527452	-1.14486
	559	0.841414	0.750666	0.937497	1.07022	0.769067	0.83333	0.82715	0.9397	1.16199	1.23934	1.22712	2.09947	0.417117	2.59611	2.03539	5.29276	12.9225	0.0691926	0.462107
	560	0.836385	0.750145	0.937738	1.08074	0.771896	0.812698	0.831899	0.928999	1.15237	1.1677	2.64964	1.74391	0.365941	1.66489	2.06524	18.1534	10.3244	0.0637574	0.84427
	561	0.82346	0.748747	0.93558	1.09489	0.776453	0.849525	0.873257	0.937888	1.11048	1.14455	3.66828	0.804627	0.360569	2.34079	2.93713	13.8272	10.2356	0.0909972	0.985383
	562	0.826683	0.754613	0.9298	1.07706	0.777856	0.819263	0.82544	0.933547	1.16142	1.20632	0.647436	1.20545	0.771494	1.1989	3.39226	7.03413	11.6614	0.00121053	-1.34252
	563	0.842037	0.795095	0.935081	1.07775	0.821883	0.834952	0.840286	0.937548	1.147	0.992991	-0.313345	0.884546	1.16738	2.72704	1.8849	12.5318	10.0145	0.0978617	0.266763
	564	0.841064	0.778994	0.936272	1.07882	0.803608	0.801889	0.810971	0.928833	1.17512	1.03269	-0.571539	1.39144	1.06603	0.984449	1.9102	5.32244	9.90369	0.0421949	-0.891808
	565	0.811331	0.736223	0.939112	1.11367	0.769893	0.849432	0.890617	0.934385	1.08752	0.89554	-3.20652	1.38132	0.545082	1.06814	2.16753	9.58905	10.062	0.0338154	-0.791928
	566	0.825098	0.745586	0.935991	1.09256	0.77183	0.828915	0.774475	0.949742	1.21985	0.943694	-3.38262	1.59794	1.39762	1.47894	2.11845	14.0379	11.2548	0.0175943	-1.78145
	567	0.817128	0.726233	0.936189	1.09759	0.752307	0.822057	0.799184	0.940926	1.19193	1.11131	-2.64189	2.08406	0.303334	1.14447	3.47315	11.1827	10.7077	0.0732781	0.447534
	568	0.834568	0.740315	0.937355	1.07823	0.760434	0.871424	0.923209	0.939837	1.04772	1.51235	-0.441735	1.69674	0.304758	1.5544	2.35577	4.86314	15.8461	0.0964743	0.594546
	569	0.814221	0.728548	0.93871	1.10753	0.758408	0.814086	0.809911	0.934756	1.17854	0.999984	0.260829	2.343	0.300455	1.36263	3.31996	11.6111	7.31626	0.0700623	0.119879
	570	0.836845	0.746819	0.932352	1.05846	0.763132	0.831853	0.818703	0.940885	1.17139	1.58712	-0.740987	1.29016	0.41431	1.93369	3.20174	2.04109	17.0566	0.0779833	0.728451
	571	0.827497	0.737478	0.937678	1.09009	0.761427	0.837751	0.873562	0.93193	1.10655	1.27651	1.45549	1.64071	0.350174	0.41118	2.78644	17.4169	16.9642	0.0994251	0.0895437
	572	0.840504	0.793755	0.928807	1.06064	0.816176	0.842965	0.881688	0.932844	1.09741	1.1139	2.89296	0.958766	1.63713	0.808398	1.20434	5.8128	19.5912	0.0591728	-0.30306
	573	0.814015	0.731929	0.93173	1.09398	0.758401	0.886701	0.941377	0.944742	1.01957	1.06995	-3.07083	1.41442	0.424116	0.942451	1.57316	3.45549	15.1246	0.00224736	-0.346083
	574	0.81762	0.743747	0.931938	1.09323	0.771217	0.836915	0.853553	0.935662	1.13156	1.05068	3.63961	0.771428	1.31333	1.87218	2.6594	12.7199	17.1646	0.022131	-1.27469
	575	0.832333	0.753507	0.929002	1.06158	0.772127	0.818925	0.850878	0.927509	1.13032	1.54936	1.42804	0.763952	0.637095	1.3993	3.33337	6.69261	19.5	0.084738	-0.24822
	576	0.836323	0.756287	0.932495	1.06702	0.775617	0.803496	0.902125	0.903733	1.01767	1.63322	1.31919	1.39434	0.479038	2.1688	2.42928	8.95018	10.3905	0.0830166	-0.814129
	577	0.828333	0.776321	0.92674	1.0725	0.801484	0.814489	0.904283	0.905851	0.982745	1.2484	1.47773	0.649671	1.41325	0.889415	1.76864	5.84378	18.03	0.0516371	-1.20498
	578	0.835023	0.761457	0.938822	1.0898	0.78764	0.817469	0.845992	0.927909	1.13609	1.00069	0.395123	2.3577	0.559721	1.76944	1.98276	2.01299	5.50493	0.0802048	-0.850901
	579	0.832965	0.748879	0.934792	1.07779	0.770308	0.837806	0.85218	0.936416	1.13345	1.11794	1.30984	1.51423	0.639026	1.82783	1.66637	10.3936	13.6481	0.0258701	-0.521528
	580	0.800051	0.717137	0.929855	1.10385	0.746415	0.823721	0.795281	0.942572	1.1965	1.1333	-0.688729	0.916686	0.341288	1.82479	4.20665	11.1062	16.1575	0.0823075	0.434995
	581	0.813276	0.727654	0.929932	1.08911	0.752366	0.802667	0.832725	0.923894	1.14896	1.18686	0.74644	0.984783	0.811052	2.4679	3.12002	18.2766	13.6805	0.0137316	-1.63039
	582	0.808694	0.711513	0.935593	1.10227	0.73805	0.82264	0.836574	0.932578	1.14887	1.08433	-2.26936	1.8657	0.430872	1.27511	2.8241	19.1245	13.6095	0.0245949	-1.01975
	583	0.833295	0.763854	0.935589	1.08503	0.789319	0.84607	0.82746	0.945458	1.16369	0.980131	-3.55243	1.11146	0.904748	2.76607	1.96299	4.44742	16.1328	0.0681931	-0.128188
	584	0.801187	0.729047	0.93447	1.11469	0.763428	0.861278	0.922049	0.934373	1.04206	0.928864	-3.36393	0.912855	0.899225	2.76296	1.99623	17.6333	17.874	0.0420252	-1.4142
	585	0.813956	0.736735	0.938386	1.10947	0.768637	0.853159	0.837933	0.946558	1.153	0.890732	-1.75477	1.0167	0.613063	1.28638	2.62526	2.26264	18.7614	0.0587801	-0.131142
	586	0.832884	0.770794	0.930088	1.07256	0.794128	0.830016	0.878851	0.926816	1.09655	1.1808	1.72999	0.611216	1.62631	0.88217	2.4689	13.2772	18.8621	0.0437138	-0.766918
	587	0.836893	0.840093	0.926531	1.06598	0.874225	0.817278	0.888068	0.917849	1.07603	1.01977	2.40881	0.734241	2.94163	1.69748	2.45429	14.0351	1.27682	0.0119338	-0.0546339
	588	0.824825	0.734448	0.931809	1.07714	0.755222	0.815011	0.880774	0.918511	1.08703	1.62926	3.32531	1.50137	0.389538	2.15848	3.33223	19.6076	12.2727	0.0866062	-0.627206
	589	0.836583	0.778943	0.934106	1.08014	0.804803	0.839162	0.919974	0.920143	1.00519	1.21565	1.95902	1.06521	0.442909	1.04898	1.78451	10.2962	6.65968	0.066267	0.480186
	590	0.837745	0.815037	0.926749	1.06391	0.842642	0.812733	0.901558	0.904508	0.976081	1.29905	3.70592	0.798281	0.58188	1.45196	1.9196	15.4111	2.13933	0.0572239	0.620336
	591	0.818354	0.80658	0.927617	1.09226	0.846181	0.844525	0.89673	0.919187	0.935704	0.889801	1.24483	0.69868	1.46532	0.595071	1.06288	9.99859	5.75775	0.0373934	0.0331126
	592	0.843495	0.766329	0.932211	1.05289	0.782723	0.823616	0.840359	0.9322	1.14453	1.59931	2.04744	1.00742	0.495282	1.38397	2.93088	17.4699	11.2394	0.0710369	0.585721
	593	0.806048	0.720047	0.939511	1.11613	0.752557	0.817028	0.836613	0.929864	1.14757	0.937766	-0.8067	2.23172	0.387696	1.14483	2.94165	10.046	10.4046	0.0937822	-0.89029
	594	0.844157	0.785674	0.931239	1.05839	0.805584	0.821594	0.87621	0.923118	1.09702	1.51342	1.77812	0.800137	0.507645	1.69544	2.9642	8.07884	6.3338	0.0862255	0.721547
	595	0.843677	0.818836	0.9306	1.06596	0.846202	0.801365	0.810088	0.928797	1.17606	1.05677	2.70104	0.649437	2.66055	2.19444	2.79101	4.84873	6.67351	0.0810207	0.222612
	596	0.842292	0.779208	0.934247	1.0707	0.801436	0.823606	0.856288	0.928589	1.12471	1.09307	-1.34772	1.34019	0.890125	1.11602	1.35404	15.2765	14.6054	0.0945687	-0.354658
	597	0.83284	0.759719	0.930443	1.06925	0.780681	0.804631	0.902916	0.903306	1.0087	1.59973	2.00792	0.875043	0.571078	1.34451	2.70572	5.84991	11.7825	0.0604419	-0.952877
	598	0.812489	0.746689	0.935428	1.10776	0.780035	0.824382	0.908168	0.910644	0.978819	1.01417	-3.60354	1.53393	0.466901	1.7063	1.73826	11.4154	7.18398	0.0645067	-0.958886
	599	0.812896	0.713884	0.937592	1.10175	0.739972	0.804643	0.725747	0.95188	1.27	0.944901	-0.150438	2.2595	0.361595	1.24343	3.14705	6.81128	19.3259	0.0669943	0.234834
	600	0.827748	0.768794	0.938627	1.10055	0.801056	0.825348	0.830303	0.935257	1.15686	0.923209	-0.742135	1.08307	0.509734	1.57676	2.94826	1.73295	5.03701	0.0335895	0.440094
	601	0.845065	0.817034	0.93426	1.07405	0.846145	0.823179	0.84213	0.931568	1.14227	0.958116	-1.68198	1.08638	0.890815	2.50422	1.82069	18.7201	2.62995	0.0712053	0.83105
	602	0.819347	0.733281	0.936235	1.09714	0.759924	0.806257	0.750929	0.945931	1.24313	0.956625	-2.28803	1.48155	0.744048	2.26262	2.75655	5.01302	19.6691	0.0768834	-0.801709
	603	0.822245	0.759094	0.931455	1.08989	0.787262	0.817883	0.755247	0.949747	1.23954	0.959206	1.48708	0.719273	2.19968	1.43613	3.59408	2.79738	10.6949	0.00682575	-0.73205
	604	0.832825	0.731971	0.930548	1.04492	0.745053	0.829934	0.842641	0.934707	1.14317	1.63393	-2.93562	2.46319	0.472816	1.75369	2.10898	19.7623	17.9423	0.00245578	-0.680253
	605	0.84369	0.786713	0.934455	1.07114	0.80991	0.80523	0.89181	0.899503	0.959932	1.54416	2.35838	2.19162	0.323794	1.03284	2.50201	15.579	1.41076	0.0906696	0.169281
	606	0.84894	0.794255	0.934678	1.06392	0.815666	0.814061	0.784511	0.940879	1.20722	1.09531	-0.770556	0.971451	0.887299	2.4907	2.23381	18.6357	8.71136	0.0951994	0.747839
	607	0.84257	0.79891	0.929462	1.06017	0.82156	0.806831	0.903031	0.903145	0.995283	1.38887	0.806527	0.888925	0.549365	1.15431	1.59626	6.26446	6.3977	0.0766404	0.616494
	608	0.837168	0.748042	0.93118	1.05242	0.76336	0.802917	0.803014	0.931321	1.18463	1.58233	0.239137	1.40026	0.52859	0.761119	3.14474	11.575	14.6426	0.0243973	-0.251464
	609	0.834713	0.745481	0.930451	1.05463	0.76134	0.82306	0.806546	0.939659	1.1838	1.52942	0.803583	1.30562	0.500589	1.52165	3.1965	19.236	10.0204	0.00435563	-0.305744
	610	0.845536	0.793956	0.926642	1.03094	0.809959	0.800304	0.787732	0.93392	1.20172	1.3203	-2.64333	0.840899	2.71001	0.549093	2.2126	8.23306	17.6533	0.0116174	-0.359913
	611	0.807365	0.718769	0.933389	1.10216	0.746589	0.823429	0.780396	0.946001	1.21286	1.07165	2.06881	1.22637	0.347215	2.07402	3.6912	10.0541	16.1216	0.0630808	0.454918
	612	0.838261	0.769726	0.936532	1.08142	0.794161	0.808688	0.802948	0.934036	1.18568	0.978539	2.03398	1.11513	0.661546	1.58669	1.71459	4.83485	14.0846	0.0643493	0.836534
	613	0.839259	0.750743	0.932717	1.05606	0.766634	0.822005	0.846349	0.930067	1.13681	1.46981	-3.32093	1.46795	0.552586	0.907769	2.41845	7.6599	17.2463	0.0326454	-0.210483
	614	0.80374	0.72208	0.932389	1.1059	0.752101	0.839762	0.918956	0.921982	1.02194	1.21077	-3.15416	1.17806	0.388345	2.24171	3.21566	19.036	6.90113	0.00437347	-1.29614
	615	0.80276	0.715624	0.935365	1.11089	0.746236	0.857237	0.846362	0.946784	1.14413	0.954533	3.42542	1.00226	0.595615	1.83133	2.69742	19.0618	17.5495	0.0187535	-0.737726
	616	0.831904	0.74452	0.930167	1.06121	0.761995	0.822607	0.808161	0.939064	1.1819	1.61647	-3.03359	1.45744	0.377308	0.969728	3.83805	9.61338	7.65496	0.0142023	0.107205
	617	0.839916	0.792721	0.933532	1.07641	0.819146	0.823978	0.827127	0.935326	1.16032	1.06138	1.85858	0.775393	0.835676	1.49455	2.81354	2.29412	6.04403	0.0347015	0.496111
	618	0.838256	0.766799	0.930785	1.06171	0.78603	0.812904	0.891562	0.914497	1.06669	1.61277	2.70926	0.964902	0.541203	2.56258	2.82827	18.8141	9.48559	0.089453	-0.345661
	619	0.845041	0.794954	0.930184	1.05582	0.815462	0.815283	0.897205	0.914215	1.05664	1.54161	2.12075	0.773526	0.592118	1.46281	2.83269	3.5201	6.16251	0.0838181	0.252428
	620	0.817646	0.74561	0.931518	1.09279	0.773252	0.838496	0.889002	0.929047	1.08536	1.37931	2.1176	0.657571	0.353576	1.3734	3.99124	3.75756	8.77967	0.0741675	0.29655
	621	0.836674	0.752701	0.93102	1.05761	0.76961	0.840181	0.848435	0.938326	1.13845	1.47945	2.78017	0.871464	0.594391	1.68584	2.73204	7.32817	16.6778	0.0253026	0.0686767
	622	0.839457	0.770027	0.931241	1.0623	0.789576	0.849978	0.896929	0.933456	1.07871	1.46039	2.4383	0.960589	0.53048	0.790495	2.9218	1.68373	7.23919	0.00307416	-0.397444
	623	0.833408	0.800543	0.929879	1.07794	0.83032	0.800309	0.860099	0.915938	1.11183	1.14713	0.195919	0.767949	0.630571	1.72288	3.54131	4.73359	2.49021	0.0836185	0.52133
	624	0.850768	0.81041	0.929368	1.04183	0.829102	0.799964	0.837213	0.921484	1.1426	1.43883	0.125938	0.851773	0.750453	1.73555	2.69198	18.7497	3.21387	0.0369151	0.535226
	625	0.804632	0.753183	0.9391	1.12325	0.795015	0.810954	0.902963	0.904222	0.984419	0.921576	2.3359	1.45372	0.346446	0.831891	2.54448	14.8914	3.23694	0.0872664	-0.429254
	626	0.838983	0.781716	0.927764	1.05512	0.801526	0.824197	0.880134	0.923507	1.09229	1.24826	-1.2061	0.825549	1.86841	1.90665	1.65714	15.1478	14.4862	0.0260781	-0.981178
	627	0.828489	0.77376	0.921058	1.04952	0.793844	0.813156	0.848343	0.902011	0.884251	1.6435	2.47854	0.64061	0.88079	2.09934	1.10132	5.11166	16.7176	0.0353714	-1.02293
	628	0.842733	0.779263	0.926995	1.03183	0.794132	0.803278	0.735799	0.948621	1.25916	1.22941	-2.70178	0.799859	1.80526	2.66538	2.10965	4.48842	18.2739	0.00280101	0.605767
	629	0.844064	0.802776	0.931191	1.06423	0.826688	0.826099	0.846279	0.932005	1.13787	1.06981	-3.44195	0.887606	2.15342	1.45098	1.75591	12.8423	10.6935	0.0540709	-0.331653
	630	0.827024	0.756418	0.93434	1.08916	0.783041	0.833585	0.82422	0.940425	1.16538	1.03805	0.960148	0.780628	0.832352	1.51532	2.81385	10.8961	14.0207	0.0438256	-0.136022
	631	0.833553	0.744715	0.932238	1.06551	0.76275	0.826457	0.899104	0.920194	1.06173	1.49646	2.96139	1.51546	0.511477	2.49788	2.02908	1.99952	17.6778	0.0436164	-0.6648
	632	0.836062	0.779405	0.925765	1.05295	0.799133	0.82078	0.909742	0.912785	1.02324	1.39695	3.42898	0.807064	1.12413	1.68313	1.45096	13.2457	17.9628	0.0541086	-0.775436
	633	0.813012	0.721607	0.937146	1.1036	0.749363	0.88878	0.926885	0.948525	1.05192	1.05285	-1.76298	1.27866	0.316391	2.17428	2.01299	1.13791	15.4542	0.017967	0.401926
	634	0.836192	0.763088	0.9319	1.0687	0.783736	0.799858	0.831068	0.922947	1.15034	1.29574	-2.97499	1.0392	0.689948	0.75367	2.92757	6.62492	13.4254	0.0471031	-0.386549
	635	0.846172	0.757691	0.934158	1.04505	0.771201	0.828482	0.807691	0.941866	1.18331	1.5744	-1.91316	2.70519	0.42791	1.10263	2.72709	3.11889	7.78915	0.00231853	-0.171409
	636	0.840193	0.77546	0.93656	1.08005	0.800034	0.831859	0.859423	0.931957	1.12301	0.994106	-0.358624	2.06204	0.64526	1.69613	1.41028	9.93511	3.75286	0.0201476	-0.572777
	637	0.829645	0.743165	0.933503	1.07747	0.764329	0.801422	0.837332	0.922185	1.14285	1.30777	-3.32387	1.86012	0.456192	2.10523	2.9763	4.6289	8.78494	0.0416275	-0.574382
	638	0.840096	0.784859	0.92769	1.05333	0.804519	0.840242	0.911889	0.924703	1.04576	1.33104	-1.18099	0.734507	1.12473	1.55172	1.62121	3.26116	19.9541	0.0765747	-0.208584
	639	0.807993	0.707515	0.932169	1.09372	0.731369	0.817982	0.850295	0.927209	1.13082	1.2296	-3.38813	1.63938	0.484342	0.454694	3.10926	12.7943	19.267	0.00724679	-1.53426
	640	0.817369	0.743118	0.93378	1.09752	0.771762	0.837248	0.899053	0.926184	1.06886	1.11395	0.594285	0.77521	0.656761	0.94963	2.67681	8.19831	16.9192	0.0477336	-0.712762
	641	0.836906	0.779243	0.932579	1.07544	0.803792	0.820969	0.905609	0.908683	0.976108	1.62891	0.0598189	0.717864	0.371987	0.552436	3.3992	9.67305	2.86815	0.0211168	-0.222589
	642	0.85018	0.810394	0.927736	1.03219	0.827686	0.805594	0.795125	0.934472	1.19411	1.25656	1.52989	0.89605	2.07147	0.971692	1.62827	2.66364	16.8135	0.0414193	0.383973
	643	0.845685	0.805018	0.927768	1.04718	0.825144	0.812569	0.861044	0.921951	1.11497	1.26549	-1.18021	0.657885	2.76956	0.945502	2.06182	11.0842	17.7727	0.0939721	-0.290925
	644	0.827623	0.747748	0.933732	1.08374	0.771469	0.864193	0.827136	0.953804	1.16658	1.05921	-1.33068	1.06736	0.594984	1.63341	2.68695	18.218	11.9504	0.00206298	-0.00544628
	645	0.831984	0.76325	0.927411	1.06193	0.783329	0.805864	0.884392	0.912494	1.07555	1.37104	1.0395	0.687785	1.35435	1.51993	2.39515	16.5414	17.7315	0.0300778	-1.3537
	646	0.834632	0.761873	0.934077	1.07805	0.784904	0.813254	0.700975	0.96197	1.2966	0.947012	-1.4606	0.716202	2.01957	0.917153	3.20865	19.0316	14.4485	0.0155682	0.281628
	647	0.837819	0.77957	0.924999	1.04264	0.797156	0.818603	0.903707	0.914211	1.04373	1.50897	-2.29049	0.965002	0.48272	2.14955	1.2179	17.6728	7.20339	0.00351002	0.884646
	648	0.83405	0.773821	0.933633	1.08156	0.799749	0.88506	0.889376	0.95234	1.09983	0.97222	-2.20902	0.6178	1.50941	1.12828	1.8881	9.1506	14.8769	0.0283284	0.235653
	649	0.848247	0.81514	0.92976	1.05303	0.837434	0.823096	0.8578	0.927989	1.12262	1.18317	1.19386	0.691649	1.63252	1.05827	2.04058	7.78442	9.149	0.0582004	0.295201
	650	0.826437	0.730986	0.935333	1.08267	0.752305	0.838167	0.904052	0.925551	1.06053	1.4456	-0.963036	1.77965	0.366107	2.33909	2.61122	2.0486	14.1177	0.0492726	-0.472013
	651	0.838708	0.785884	0.934723	1.08008	0.81246	0.826215	0.787544	0.945519	1.20535	0.897229	-2.12614	0.672224	2.58552	1.39156	2.19928	1.68907	14.5112	0.0397123	0.72882
	652	0.835042	0.768853	0.935597	1.08379	0.794427	0.835458	0.817897	0.942671	1.17284	0.995001	-2.66648	0.984854	0.988964	1.46019	2.28805	1.3257	16.404	0.0608368	-0.0786243
	653	0.843674	0.794253	0.931496	1.06371	0.81675	0.804317	0.841789	0.922466	1.13791	1.15726	1.52841	0.992532	1.33318	1.23435	1.92604	2.53885	13.5125	0.0681102	-0.494611
	654	0.82522	0.734649	0.931369	1.07507	0.754918	0.851456	0.912041	0.931089	1.05466	1.59452	0.756253	0.766871	0.455242	1.89028	3.0416	15.9689	14.9787	0.027827	-0.54958
	655	0.838244	0.766208	0.932177	1.0667	0.786435	0.813604	0.850747	0.924945	1.12901	1.31393	-3.18423	1.13093	0.608828	2.68988	2.54486	13.3388	10.5675	0.0728823	-0.0767516
	656	0.830928	0.788032	0.933348	1.08815	0.819122	0.80914	0.881656	0.915112	1.08246	1.05377	-1.84291	1.15578	0.590618	2.69383	2.88313	7.46277	1.76673	0.0135085	-0.257455
	657	0.82948	0.733878	0.929798	1.05736	0.749795	0.799826	0.752847	0.942728	1.24043	1.44533	2.03248	1.46604	0.487684	1.32373	3.37898	1.40951	14.8292	0.00374762	-0.107189
	658	0.845173	0.770982	0.93429	1.06082	0.789209	0.811517	0.768967	0.943642	1.22405	1.16674	-1.77056	1.14803	0.712775	2.08785	2.25803	5.24474	17.2544	0.0954966	0.763683
	659	0.832003	0.755787	0.931921	1.07397	0.777439	0.862589	0.890715	0.928921	0.916988	1.54279	-3.05968	0.824733	0.415409	1.26839	1.59261	10.4533	16.8143	0.0782328	0.116132
	660	0.843462	0.769692	0.932623	1.05744	0.787391	0.812367	0.778534	0.941622	1.21363	1.24117	0.301283	0.942606	0.757845	1.61006	2.51379	10.0236	15.8394	0.0529353	0.625146
	661	0.836154	0.752364	0.932113	1.06357	0.770493	0.853296	0.868555	0.940615	1.11727	1.38038	-3.47211	0.807904	0.560775	1.20024	2.45896	15.2409	19.4471	0.0450101	0.514083
	662	0.820494	0.729506	0.934185	1.08906	0.753211	0.828482	0.86134	0.929915	1.11964	1.24544	0.270304	1.28331	0.457148	1.52066	2.8368	7.42563	19.4673	0.064795	-0.439726
	663	0.846793	0.79228	0.932925	1.06149	0.813272	0.807126	0.809628	0.931584	1.17765	1.09664	1.35213	1.27034	1.45383	0.829538	1.42424	17.5745	12.9042	0.0485227	-0.619227
	664	0.828015	0.726137	0.937808	1.08423	0.746941	0.823919	0.790957	0.943695	1.20132	1.15274	0.343641	2.40786	0.38792	0.608973	2.57949	8.34767	18.6401	0.0391259	-0.015882
	665	0.845486	0.79889	0.936876	1.07795	0.825687	0.814865	0.802607	0.936796	1.187	0.955061	1.18235	1.52076	1.43143	0.315926	1.49915	3.08366	12.1858	0.0657264	-0.729613
	666	0.847851	0.767541	0.937911	1.06659	0.786112	0.80109	0.670816	0.965486	1.32737	0.910129	1.00627	1.78815	1.08608	1.69662	1.28832	15.5396	14.5386	0.0368052	0.396095
	667	0.805446	0.710197	0.933561	1.10184	0.736942	0.828453	0.888311	0.910597	0.933056	1.28003	-2.35102	2.43353	0.343395	0.807687	1.43399	14.459	16.1934	0.0227074	-1.49994
	668	0.841125	0.807397	0.936889	1.08525	0.839236	0.806029	0.795804	0.934461	1.19339	0.90088	3.44585	1.2701	1.18239	2.64554	2.02376	17.2624	3.21521	0.060592	-0.0548054
	669	0.820558	0.744305	0.935458	1.09728	0.772511	0.803878	0.751267	0.944821	1.24254	0.946241	-0.545742	1.08724	1.0897	1.06586	3.01599	8.05454	17.3806	0.0368612	-0.87233
	670	0.844727	0.801709	0.925696	1.03563	0.819641	0.834356	0.821184	0.941457	1.16896	1.25066	-0.33857	1.07962	1.46462	0.893679	1.69251	5.40353	12.3509	0.00158164	-0.16188
	671	0.815257	0.751214	0.933888	1.10244	0.783137	0.815627	0.800569	0.937678	1.18944	0.963386	-3.42322	0.763284	0.591618	0.626882	3.70978	11.5282	10.1004	0.0497671	0.219863
	672	0.80522	0.717124	0.934483	1.10663	0.746313	0.820995	0.906668	0.91453	1.03749	1.27094	2.21404	1.31531	0.364287	1.59799	2.98184	15.7386	15.1391	0.0772661	-0.958728
	673	0.812798	0.724057	0.932886	1.09546	0.749943	0.834701	0.829829	0.93973	1.15914	1.13308	3.02316	0.980543	0.508184	1.79052	3.11076	19.0474	17.7125	0.0346744	-0.357893
	674	0.831997	0.772707	0.930439	1.07582	0.797331	0.858852	0.850076	0.946789	1.14016	1.05314	-3.10856	0.669751	2.11995	1.49833	2.69445	9.65683	10.0491	0.00471739	-0.681457
	675	0.819291	0.761586	0.935811	1.10354	0.79506	0.809772	0.853959	0.922255	1.12363	0.951036	-2.33142	1.24611	0.73724	1.97685	2.78943	15.7737	3.41584	0.0180385	-1.06786
	676	0.823593	0.74898	0.93116	1.08401	0.773694	0.816851	0.867345	0.922687	1.1078	1.48239	2.5916	1.15519	0.341655	1.58725	3.99687	1.46357	7.68807	0.0934987	0.160495
	677	0.844107	0.774308	0.930316	1.0467	0.790476	0.835298	0.894184	0.926237	1.07587	1.61756	0.14093	0.825857	0.64968	1.46611	2.44586	11.064	8.66479	0.0169645	-0.274408
	678	0.851552	0.812645	0.929653	1.04193	0.831491	0.821766	0.805346	0.939312	1.18495	1.21126	3.30178	0.78802	1.74102	2.73949	1.81549	10.2285	11.2061	0.0693704	0.558678
	679	0.821147	0.730146	0.939911	1.10168	0.757365	0.851215	0.807665	0.951991	1.18625	0.905551	-0.814595	1.69397	0.467384	1.92566	2.13637	3.92083	18.7557	0.0620896	0.0757637
	680	0.83818	0.74558	0.937833	1.07538	0.76509	0.807822	0.781813	0.93879	1.20943	1.11516	0.899708	2.25448	0.516237	1.32407	2.07201	16.4524	10.363	0.0336261	-0.300962
	681	0.844552	0.769977	0.935467	1.06634	0.789416	0.834186	0.896885	0.925037	1.0708	1.35592	1.7553	1.49887	0.454726	1.3302	1.87266	9.30722	9.36836	0.064636	0.28417
	682	0.832952	0.758624	0.936052	1.08512	0.783373	0.80871	0.694547	0.961903	1.30307	0.898158	-2.9775	1.11576	1.49034	2.00248	2.70823	16.0437	10.2158	0.0102361	-0.206881
	683	0.827759	0.74353	0.938303	1.09347	0.769275	0.831584	0.833617	0.937444	1.15418	1.03773	2.05902	1.48232	0.517948	1.00787	2.23721	11.7418	17.6384	0.0894281	-0.210554
	684	0.838886	0.781108	0.934631	1.07842	0.806373	0.830524	0.824334	0.938954	1.16472	0.99226	-3.63122	1.1891	1.59616	0.93448	1.73737	7.41966	13.6573	0.0426644	-0.819825
	685	0.836312	0.756242	0.936673	1.08037	0.778758	0.804254	0.677976	0.964716	1.32008	0.939082	-3.68144	1.72009	2.36559	1.19641	2.04231	13.382	19.1996	0.0338674	-1.39988
	686	0.828461	0.736049	0.933595	1.07632	0.756206	0.801075	0.884888	0.909684	1.07137	1.40888	-2.82778	2.19583	0.470222	2.74555	2.29193	17.9485	10.5805	0.0601174	-1.2141
	687	0.825462	0.732049	0.932724	1.07736	0.752439	0.848082	0.895555	0.932716	1.07988	1.57733	0.293201	1.04518	0.394537	0.431162	3.27733	14.096	15.7563	0.0228536	-0.459741
	688	0.815828	0.746929	0.934746	1.10252	0.778019	0.82282	0.755041	0.951886	1.24019	0.908608	1.11022	1.23731	2.01366	1.11811	3.0439	16.5714	9.84986	0.00528457	-1.89496
	689	0.845728	0.776502	0.929425	1.03289	0.790503	0.800826	0.793017	0.932858	1.19579	1.45132	2.6243	1.15384	0.900403	1.54669	1.98622	1.49151	19.2337	0.0250797	0.183138
	690	0.842326	0.803249	0.931254	1.06781	0.828574	0.809344	0.858883	0.920833	1.11682	1.09419	0.978178	0.972307	1.6057	1.27952	1.75634	3.9846	9.90631	0.0557527	-0.570168
	691	0.843276	0.774471	0.930298	1.04982	0.79138	0.810333	0.870975	0.918456	1.09999	1.38517	-2.35491	1.25805	0.803134	1.28291	1.59357	18.7718	14.7814	0.054431	-0.41743
	692	0.817521	0.811843	0.931177	1.09998	0.85623	0.814967	0.907156	0.90975	1.0218	0.889207	2.28849	1.53673	1.48676	0.553888	1.96314	11.3488	1.18616	0.0925188	-1.51005
	693	0.825404	0.751054	0.931847	1.08362	0.77564	0.826156	0.780037	0.947228	1.21354	1.03673	2.68901	0.731575	1.63002	2.29248	2.97505	15.3005	17.9936	0.0254718	-0.668603
	694	0.827112	0.760702	0.929519	1.07776	0.784943	0.810591	0.872655	0.918151	1.09756	1.5261	-1.72228	0.914016	0.370577	0.904873	4.26908	2.05238	4.17085	0.0232973	-0.101958
	695	0.839653	0.774311	0.931097	1.06339	0.794648	0.799822	0.887033	0.908261	1.06592	1.4025	1.17644	1.04939	0.69852	0.904361	2.31696	2.95339	10.2248	0.0326505	-0.763263
	696	0.826783	0.738702	0.938775	1.0943	0.764126	0.838021	0.836798	0.939801	1.15169	1.09395	3.3704	1.7121	0.342986	1.01025	2.6961	5.2946	11.2912	0.0491052	0.473126
	697	0.810235	0.709164	0.929107	1.08274	0.730345	0.851778	0.914976	0.923834	0.962214	1.43039	-1.31816	2.80116	0.346827	1.78175	1.12943	19.0519	17.5786	0.00572762	-1.26246
	698	0.843228	0.788367	0.932661	1.06674	0.810793	0.830154	0.904589	0.912566	0.96181	1.51171	0.469709	0.920716	0.441533	1.22457	2.02176	17.8159	5.3809	0.0930593	0.34774
	699	0.834549	0.810517	0.929414	1.07616	0.841503	0.833252	0.899855	0.923763	1.06494	0.977581	1.41438	1.48572	1.09581	2.63628	1.37628	5.52718	2.01588	0.00787025	-0.741125
	700	0.833961	0.76196	0.931585	1.07175	0.783586	0.823676	0.906532	0.916287	1.04158	1.60729	0.128329	0.836838	0.451623	1.66148	3.25836	5.50068	9.01093	0.0873495	-0.192866
	701	0.842294	0.759648	0.933292	1.05682	0.776189	0.801101	0.852641	0.918238	1.1226	1.52911	-1.67623	1.69229	0.509983	1.16373	2.64671	5.60954	8.51635	0.026023	-0.547439
	702	0.825119	0.731659	0.927744	1.05929	0.748463	0.807398	0.831063	0.926571	1.15214	1.45942	-1.75087	1.11701	0.725117	2.10969	2.90525	9.40378	18.9846	0.00483195	-1.25927
	703	0.83581	0.780657	0.931753	1.07533	0.805631	0.801319	0.793751	0.932853	1.19501	1.0641	-2.12115	0.750877	2.17754	1.50781	2.84732	18.5332	12.2356	0.05223	-0.634354
	704	0.832056	0.774444	0.931603	1.07947	0.800295	0.812262	0.809433	0.934012	1.17878	1.06609	2.21609	0.812561	1.48143	1.66685	2.90647	16.7884	6.8188	0.0103401	-0.862104
	705	0.805121	0.713555	0.933105	1.10264	0.741076	0.841124	0.877044	0.93291	1.10304	1.12066	1.21667	1.06957	0.524325	2.49376	2.76353	10.2772	18.8142	0.0203487	-1.06643
	706	0.833353	0.795429	0.933037	1.08518	0.826481	0.865502	0.893143	0.942045	1.08978	0.935499	2.94742	0.577564	2.54324	1.90269	2.05594	9.31694	10.7179	0.0788605	0.189498
	707	0.826902	0.737232	0.935625	1.08565	0.760069	0.817944	0.753552	0.950253	1.24137	1.06731	2.50297	1.27794	0.48829	1.45832	2.98799	5.49223	16.8817	0.0388124	0.46827
	708	0.825742	0.738683	0.933638	1.08289	0.761227	0.866065	0.92835	0.935652	1.03151	1.5007	-3.03592	0.795528	0.384041	1.56811	2.92412	4.66241	18.5092	0.0955843	0.162768
	709	0.831682	0.759425	0.926538	1.05667	0.778036	0.826376	0.884145	0.923768	1.08724	1.32555	-2.25691	1.17745	1.00522	1.88017	1.78646	1.12896	13.4371	0.00326359	-1.45102
	710	0.831044	0.763541	0.932033	1.07906	0.787766	0.834644	0.781015	0.950684	1.21336	1.04106	3.00849	0.54769	1.51827	2.28809	3.13614	10.1404	18.8988	0.0557509	0.198076
	711	0.840386	0.831435	0.924449	1.05284	0.858882	0.811109	0.891347	0.913495	1.06574	1.18521	2.12374	0.653806	2.92585	1.90197	2.28542	2.74492	3.2611	0.00982683	-0.460386
	712	0.836079	0.768299	0.931007	1.06823	0.789598	0.85359	0.807634	0.953011	1.18654	1.01647	1.58432	1.30988	1.94447	1.87467	1.12537	17.9655	19.2556	0.0305829	-0.908633
	713	0.828037	0.786799	0.932922	1.09076	0.819117	0.85813	0.9205	0.932902	1.04264	0.942781	-1.02288	0.771777	1.38659	1.52712	1.65211	1.68768	12.0576	0.072133	-0.238367
	714	0.818824	0.754918	0.933553	1.09815	0.785486	0.802784	0.880232	0.89707	0.938763	1.2895	1.23031	0.907708	0.433603	0.745563	2.41655	6.55322	7.16523	0.0396006	-0.898069
	715	0.83428	0.76673	0.937063	1.08805	0.793356	0.8331	0.767795	0.953131	1.22743	0.920002	0.929857	1.13511	1.81633	0.776939	2.15148	15.1971	15.4945	0.0283171	-0.741431
	716	0.832765	0.784528	0.932761	1.08365	0.813158	0.806911	0.818763	0.92928	1.16687	1.06033	3.38922	0.638332	0.963997	0.847277	3.23708	12.2276	8.89616	0.068365	0.171562
	717	0.829479	0.785541	0.931905	1.08635	0.815884	0.813504	0.827292	0.930347	1.15804	0.998936	-2.37126	0.78467	1.39894	2.52055	3.10868	1.39948	4.94659	0.0115568	-0.594226
	718	0.832882	0.744329	0.937943	1.08488	0.76695	0.830277	0.874632	0.927994	1.10263	1.21641	-3.63835	2.0815	0.327304	1.15462	2.16531	11.1902	11.3678	0.0818957	0.639318
	719	0.806452	0.765419	0.928145	1.10367	0.80222	0.847797	0.889489	0.920819	0.922909	0.953757	-1.23076	0.615429	2.3471	2.195	1.35124	15.536	15.9724	0.0913985	-1.39345
	720	0.812151	0.713582	0.93098	1.08696	0.735975	0.843988	0.919038	0.924806	1.03001	1.48841	-1.98902	0.923981	0.447345	0.708198	3.03968	18.7383	17.3475	0.00620414	-1.39724
	721	0.847846	0.802046	0.933016	1.06271	0.824597	0.819288	0.819919	0.934794	1.16786	1.10759	0.133942	0.901435	1.12564	0.899996	2.30625	11.4832	5.25517	0.00994121	0.0797805
	722	0.813488	0.750073	0.936043	1.10848	0.784118	0.826687	0.890407	0.922468	1.07746	0.9954	2.74775	0.970323	0.572769	1.87508	2.67812	7.17679	9.85939	0.0752526	-0.588475
	723	0.827183	0.785163	0.933173	1.09217	0.817809	0.844945	0.799021	0.951101	1.19494	0.893241	-1.57706	0.715326	2.24528	1.23622	3.62993	17.6513	5.28582	0.0030361	-0.286683
	724	0.826581	0.754106	0.935308	1.09144	0.7811	0.869174	0.877716	0.946606	1.11001	0.982994	1.88384	0.946016	0.776913	2.21376	1.74862	9.84756	18.9524	0.0579521	-0.0586294
	725	0.849688	0.809924	0.929822	1.04766	0.829906	0.837	0.820062	0.942878	1.17063	1.12328	2.1124	0.814139	2.67383	1.56698	1.54988	7.77754	15.0837	0.06529	0.326479
	726	0.816679	0.716099	0.939209	1.10093	0.741701	0.834064	0.749224	0.958055	1.24724	0.894373	1.45186	1.94714	0.477035	0.783824	2.36761	18.1605	19.0225	0.0218066	-0.143781
	727	0.847712	0.792965	0.928371	1.03371	0.808698	0.809041	0.844777	0.924113	1.13541	1.5405	1.35467	0.698278	0.997534	1.08758	2.22609	11.007	16.9314	0.0768141	0.49581
	728	0.840531	0.829923	0.926178	1.05856	0.858414	0.870333	0.863925	0.949595	1.1264	0.972657	3.31656	1.06497	2.77762	1.75115	1.41253	18.0988	3.98262	0.00275969	0.0732566
	729	0.808713	0.705829	0.930072	1.08624	0.727587	0.809096	0.793158	0.936568	1.19688	1.28987	3.737	1.77382	0.432025	1.8141	3.46668	18.5422	14.9137	0.00449492	-1.10169
	730	0.825314	0.754475	0.933078	1.08803	0.780786	0.806487	0.710485	0.956679	1.28626	0.938808	3.50528	0.866584	2.94881	0.978498	3.29736	11.5582	17.1259	0.0161543	-0.793109
	731	0.835952	0.781038	0.931359	1.07404	0.805706	0.810488	0.844485	0.924869	1.13616	1.16131	0.47135	0.841696	0.906385	2.37716	2.80304	9.65486	5.16343	0.0133351	-0.525491
	732	0.809128	0.712625	0.934167	1.099	0.73837	0.83151	0.849206	0.934028	1.1356	1.29089	3.04744	1.95381	0.301786	2.55944	3.40195	12.8249	15.2589	0.074873	-0.208293
	733	0.842217	0.807662	0.934818	1.07871	0.83706	0.822318	0.768711	0.94829	1.22543	0.914516	3.45009	1.11105	2.98081	2.88244	2.1746	6.34065	4.98741	0.0189475	-0.386395
	734	0.818056	0.748443	0.932411	1.09506	0.777118	0.874159	0.923737	0.935391	0.959482	1.0772	1.53632	0.983307	0.404898	1.0323	1.13081	18.038	16.7416	0.0768495	0.498498
	735	0.828904	0.737375	0.93766	1.08775	0.760449	0.825423	0.85823	0.929092	1.12276	1.23153	2.36477	2.62084	0.345083	1.78517	2.70765	4.21703	6.7401	0.0272176	-0.386002
	736	0.81215	0.727577	0.934725	1.10168	0.75584	0.850913	0.925261	0.92677	1.01494	1.25174	1.28155	0.901651	0.384797	1.91039	2.61623	15.0713	14.0727	0.0476472	-0.453764
	737	0.819598	0.736828	0.935471	1.09628	0.763727	0.890781	0.939296	0.947556	1.03057	1.24934	2.46842	0.592773	0.353908	2.54	2.62405	3.56247	15.6359	0.0523592	0.632511
	738	0.825166	0.744406	0.934423	1.08823	0.769256	0.85696	0.851539	0.945648	1.13815	1.14965	-0.967475	0.776124	0.47615	1.76634	2.924	16.7132	16.4371	0.0857455	0.592853
	739	0.839013	0.791201	0.932575	1.07488	0.817124	0.812284	0.905128	0.905506	0.991543	1.1874	-1.79091	2.50447	0.403104	1.74012	1.87904	4.4257	1.20557	0.0748277	0.0666289
	740	0.826607	0.738676	0.932318	1.07746	0.759772	0.80631	0.840357	0.923898	1.14034	1.22802	-1.54058	1.10448	0.367114	1.67703	2.25753	15.8414	16.2697	0.00159355	0.794841
	741	0.841986	0.819009	0.928301	1.06169	0.845693	0.842782	0.914694	0.925413	1.0414	1.11617	-1.18072	0.601149	1.63748	1.72009	1.70686	8.69363	6.69356	0.068685	0.369764
	742	0.835045	0.766349	0.929083	1.06265	0.786368	0.837673	0.800351	0.94756	1.19264	1.1132	-2.38308	1.03553	2.54771	1.09202	2.13842	18.1187	16.6199	0.00330475	-1.31686
	743	0.852695	0.780114	0.937396	1.05953	0.797795	0.818054	0.857335	0.925638	1.12175	1.3551	-0.361948	2.61012	0.396273	2.60105	2.14264	7.1535	3.24323	0.0464845	0.442224
	744	0.823542	0.767954	0.933512	1.09477	0.798895	0.833931	0.878295	0.928945	1.09881	0.986596	2.91889	0.940703	1.50412	2.21748	1.95727	16.4272	13.8681	0.0759057	-1.23322
	745	0.841545	0.782465	0.936398	1.07931	0.80768	0.812368	0.756889	0.946983	1.23726	0.963465	3.60761	1.02784	1.57186	0.940624	2.28627	7.33148	14.183	0.043786	-0.193215
	746	0.831634	0.758907	0.926665	1.05703	0.777526	0.837545	0.813454	0.944637	1.17814	1.46328	-1.66774	0.733038	0.610059	1.71923	4.05396	19.3821	8.48651	0.00200187	-0.193594
	747	0.838626	0.750977	0.935266	1.06873	0.769571	0.82031	0.8709	0.923653	1.10411	1.50077	2.03617	1.73144	0.419437	1.25523	2.63627	10.8726	12.9848	0.0933946	-0.104507
	748	0.834078	0.762604	0.927486	1.05623	0.781057	0.81837	0.864718	0.924052	1.11195	1.41041	2.32611	0.66826	1.17702	2.54092	2.63896	7.3447	17.1635	0.0230994	-0.924995
	749	0.816216	0.757753	0.936423	1.10755	0.792454	0.825054	0.824578	0.936372	1.16348	0.895944	2.40201	0.875377	1.19434	0.605206	3.02079	1.58441	12.5321	0.0279854	-0.857037
	750	0.812753	0.716449	0.935871	1.09922	0.742232	0.84016	0.752539	0.959839	1.24418	0.933396	2.28505	1.21617	0.395511	2.49911	2.90443	1.91892	16.2499	0.00356898	0.75782
	751	0.831514	0.765792	0.935522	1.08807	0.792781	0.853815	0.815668	0.951428	1.17782	0.942082	-1.97643	0.800878	1.35333	2.10063	2.27242	9.59391	19.2542	0.0720251	-0.0128091
	752	0.845221	0.785605	0.930035	1.0498	0.803556	0.81104	0.817453	0.931561	1.16923	1.37702	-3.62386	0.924547	0.731334	1.72568	2.84689	1.60561	9.54729	0.0565053	0.461734
	753	0.803377	0.714734	0.934251	1.10767	0.744147	0.82777	0.9138	0.915657	1.01779	1.28789	-2.72231	1.15073	0.3638	1.01215	3.02887	15.2454	18.4164	0.0830366	-0.923282
	754	0.828634	0.761601	0.9345	1.08866	0.788614	0.884067	0.844493	0.959449	1.15013	0.903837	-3.53215	0.879471	1.64109	1.584	1.85039	2.47128	17.7699	0.0180165	-0.210837
	755	0.833505	0.767707	0.932453	1.07741	0.791659	0.835602	0.884337	0.928549	1.09095	1.37338	3.08989	0.751704	0.453566	1.61484	3.2612	8.59465	7.44436	0.0737584	0.400508
	756	0.835856	0.762664	0.932165	1.07011	0.783641	0.81361	0.707143	0.960452	1.29017	1.00241	-3.50097	0.727008	2.38325	1.26625	3.15697	7.37199	18.4152	0.0143225	0.119538
	757	0.844693	0.796173	0.926131	1.03409	0.813113	0.816946	0.882203	0.919176	1.08569	1.50786	-2.98392	0.718604	1.30367	2.46761	1.9673	5.60753	16.3185	0.0792503	-0.146842
	758	0.838833	0.780741	0.934133	1.07702	0.805566	0.802409	0.710094	0.955212	1.28642	0.957145	-1.75304	0.961468	1.0514	0.964993	3.36159	4.03671	7.82298	0.0022573	0.436099
	759	0.844109	0.795236	0.929734	1.05638	0.816119	0.810405	0.850739	0.923332	1.12807	1.23022	-3.50799	0.819331	1.29451	1.44233	2.17032	11.5594	9.89339	0.0428756	-0.284167
	760	0.836806	0.779911	0.932456	1.07544	0.804589	0.813143	0.793324	0.938272	1.19724	1.04256	-1.1429	0.722355	2.87378	1.42422	2.75663	17.3059	15.4223	0.0612568	-0.568806
	761	0.845556	0.825702	0.926613	1.04883	0.849635	0.799837	0.864905	0.914426	1.10454	1.26638	-0.852276	0.598878	1.62271	1.66082	2.65972	2.87963	4.09637	0.0263158	0.0546071
	762	0.837722	0.773096	0.934312	1.07718	0.796989	0.8515	0.923721	0.928023	1.02525	1.29513	-0.0605027	1.22218	0.417021	0.601542	2.42645	4.53219	4.88359	0.00456383	-0.10832
	763	0.839183	0.76581	0.937716	1.08188	0.789615	0.815409	0.698041	0.963601	1.29976	0.895619	0.581765	1.11947	1.82102	1.47143	2.19705	17.146	19.7982	0.0461904	-0.00192604
	764	0.845266	0.787748	0.92735	1.03155	0.803081	0.813474	0.777145	0.942415	1.21529	1.29539	-3.41686	0.949195	1.63398	1.6064	1.96083	9.29991	12.9322	0.00506715	-0.0284311
	765	0.847068	0.77375	0.936327	1.06565	0.793058	0.80143	0.674434	0.964608	1.32364	0.946511	-3.61833	1.227	1.63559	1.46972	1.95006	16.3186	16.9031	0.0317242	0.378642
	766	0.846803	0.765021	0.935551	1.05804	0.781613	0.811601	0.881193	0.916654	1.08467	1.53797	3.0701	2.00588	0.371474	1.24341	1.72342	7.26563	9.37015	0.050129	0.674141
	767	0.838367	0.741256	0.933835	1.05552	0.756098	0.84633	0.884806	0.933977	1.0944	1.60192	-3.72646	2.04621	0.434892	0.699566	2.09593	14.4357	17.3162	0.0233266	-0.213437
	768	0.835729	0.771404	0.939538	1.09299	0.800114	0.809783	0.779152	0.940335	1.21264	0.918249	1.29999	1.32047	0.548828	0.999087	2.73511	7.41461	4.47732	0.0153546	0.47401
	769	0.841816	0.773508	0.938097	1.08103	0.79776	0.808628	0.722842	0.954252	1.27336	0.920678	-1.02049	1.17647	1.31374	1.66212	2.17265	13.8519	13.794	0.0542283	0.0283112
	770	0.818156	0.742136	0.933175	1.09481	0.769697	0.89119	0.938523	0.947942	1.0327	1.29599	2.48042	0.560192	0.353761	1.75668	3.41682	3.41654	7.2878	0.00323655	0.0321497
	771	0.827027	0.752471	0.937878	1.09626	0.780577	0.843796	0.745649	0.96296	1.25164	0.886884	2.14011	1.778	2.32855	2.05144	1.81101	12.3793	11.7423	0.0215682	-1.7883
	772	0.849793	0.769595	0.935069	1.04937	0.784516	0.805834	0.839282	0.923854	1.14153	1.62507	2.91531	2.29823	0.426066	1.688	2.58124	18.4726	5.06897	0.0432049	0.0520641
	773	0.846412	0.772808	0.931616	1.04408	0.787875	0.826587	0.807954	0.940929	1.18274	1.32239	-2.55747	1.23858	0.728098	2.35376	1.69349	17.62	17.0268	0.0633408	0.675823
	774	0.821343	0.77511	0.933036	1.09764	0.808799	0.820654	0.874261	0.923008	1.09941	0.971147	-2.93528	0.650522	1.31153	1.12039	2.92234	13.1174	7.41653	0.038991	-0.632426
	775	0.834088	0.753622	0.936516	1.08273	0.776779	0.866482	0.860857	0.948381	1.12921	1.02862	-0.188498	1.26766	0.533705	2.65712	1.54237	16.3358	13.0174	0.0405319	0.496911
	776	0.836316	0.795102	0.934715	1.08513	0.825432	0.815506	0.887614	0.917005	1.07578	0.996381	-0.576187	1.14528	0.950958	1.02955	1.63595	9.82942	5.53837	0.043091	-0.50659
	777	0.82902	0.738376	0.934365	1.07885	0.759329	0.864592	0.898076	0.940784	1.08296	1.45415	-1.15331	0.73816	0.365576	1.50024	2.8428	6.52313	16.6884	0.0423685	0.699644
	778	0.843955	0.784732	0.931065	1.05774	0.804413	0.821677	0.795954	0.941477	1.19547	1.18882	3.26559	0.676234	1.41351	1.64372	2.58621	8.37346	15.5052	0.0495535	0.228594
	779	0.818102	0.733524	0.935666	1.09768	0.760567	0.868305	0.844763	0.952228	1.1477	0.981236	-2.99744	0.892348	0.574901	2.84445	2.43262	17.4655	19.3265	0.0439575	0.229433
	780	0.835432	0.750198	0.93111	1.05972	0.767432	0.814458	0.863178	0.922455	1.11273	1.52472	-3.5702	1.24002	0.578921	1.18011	2.68406	14.0752	18.1834	0.0665582	-0.45075
	781	0.835714	0.763444	0.935233	1.08003	0.787022	0.839506	0.898081	0.927644	1.07178	1.19927	-0.304044	1.11733	0.523378	1.45147	2.0399	7.11543	13.6616	0.0969872	0.123562
	782	0.805845	0.787112	0.931236	1.11133	0.832073	0.801323	0.899084	0.899698	0.988884	0.905745	-2.02718	0.652077	0.831061	1.19929	3.09712	3.44477	2.24689	0.0319365	-0.430888
	783	0.836514	0.769848	0.935939	1.08267	0.794982	0.842081	0.791292	0.951563	1.20301	0.954753	-2.91299	0.941243	1.15292	1.93219	2.19634	4.91628	18.7504	0.0757608	0.182097
	784	0.843685	0.794758	0.929449	1.05606	0.815599	0.801071	0.832875	0.923056	1.14836	1.21309	-1.21031	0.781119	2.02169	1.39686	2.27881	15.7999	9.53761	0.0270745	-0.717983
	785	0.818451	0.770545	0.936134	1.10642	0.807008	0.805247	0.902086	0.905507	1.02566	1.02864	3.42016	1.30486	0.373083	1.12769	3.03885	5.60231	1.8982	0.0344977	-0.111637
	786	0.838302	0.744483	0.935084	1.06447	0.761425	0.813563	0.789961	0.939344	1.20109	1.37572	3.51514	1.85084	0.439998	1.45112	2.70958	6.43073	17.0517	0.0661193	0.345827
	787	0.827332	0.746785	0.932928	1.08166	0.76989	0.828537	0.780018	0.948296	1.21382	1.07486	-2.32615	0.852663	0.745585	1.44922	3.12587	1.90079	16.4286	0.0205106	0.103035
	788	0.803937	0.734515	0.928199	1.10075	0.765105	0.805327	0.829337	0.925978	1.15377	1.25479	0.183842	0.826453	0.338464	0.82311	4.5803	16.7459	7.65009	0.0631501	0.129452
	789	0.827652	0.745684	0.936	1.0888	0.770445	0.808744	0.750372	0.94716	1.24397	1.01712	-1.54171	1.17995	0.548732	1.02758	3.16434	4.41026	14.5147	0.0457533	0.375488
	790	0.844246	0.8046	0.924488	1.02979	0.822259	0.827326	0.913931	0.915029	1.01371	1.56662	-1.29753	0.795734	0.969337	2.04201	1.3558	12.5673	6.25317	0.0150167	-0.230181
	791	0.842623	0.773382	0.935225	1.07105	0.794787	0.834741	0.793562	0.947835	1.19974	1.04023	-2.13632	0.957166	1.09075	1.09816	2.0775	17.0423	12.7973	0.0259217	0.146941
	792	0.828827	0.746364	0.939633	1.09596	0.773113	0.814089	0.750905	0.949256	1.24387	0.905837	-2.21073	1.47726	0.577301	1.20701	2.6065	10.0241	12.1262	0.0477855	0.161813
	793	0.82544	0.746343	0.934817	1.08948	0.771776	0.840781	0.91642	0.923671	1.03405	1.45642	2.22516	0.956968	0.337785	1.23464	3.15247	16.5121	8.64477	0.0680744	0.00353071
	794	0.848165	0.813821	0.925732	1.02735	0.83148	0.821929	0.836454	0.932246	1.14885	1.31699	3.73516	0.997586	1.33858	2.44805	1.08658	12.869	10.6537	0.0568918	0.637112
	795	0.830683	0.744491	0.937124	1.08641	0.767912	0.833654	0.894578	0.925278	1.07437	1.31955	-0.356043	1.85493	0.335172	2.28932	2.61159	17.5128	6.76337	0.0504749	-0.0581509
	796	0.843317	0.774831	0.936882	1.07543	0.797446	0.847228	0.769859	0.958686	1.2264	0.933843	-0.811277	1.04051	1.04388	2.22756	1.73322	11.0952	12.9816	0.0361859	0.706008
	797	0.844176	0.817741	0.923778	1.03484	0.838153	0.850978	0.900449	0.933233	1.07384	1.2615	-1.21849	0.736488	1.89061	2.10781	1.27351	1.33461	6.8685	0.00810941	0.160862
	798	0.838176	0.75661	0.935052	1.07205	0.776775	0.826848	0.904902	0.911101	0.966226	1.61947	-0.96913	1.61889	0.378058	1.67094	1.97884	14.7788	9.51229	0.092535	-0.32571
	799	0.833413	0.777429	0.937763	1.09322	0.80771	0.801415	0.800094	0.931307	1.18773	0.938503	3.42762	1.4189	0.979368	1.52129	2.25058	16.2093	5.43216	0.0515911	-0.874134
	800	0.823381	0.781868	0.933462	1.09698	0.816289	0.81741	0.890161	0.91738	1.07238	0.951248	-3.65862	1.24464	1.33341	1.43388	1.92356	2.91064	6.30632	0.0504418	-1.51215
	801	0.827892	0.740744	0.931705	1.07407	0.76112	0.817471	0.814544	0.935221	1.17377	1.39434	3.67507	1.16727	0.456229	1.99448	3.28948	18.9902	15.7641	0.0781006	0.106039
	802	0.813362	0.747768	0.933124	1.10242	0.779416	0.841489	0.893862	0.917568	0.933141	1.0796	1.42597	1.03787	0.459432	1.08722	1.33497	15.3057	11.54	0.0494388	-0.493312
	803	0.8336	0.762969	0.932327	1.07517	0.785632	0.802805	0.874707	0.896706	0.929087	1.5244	3.04962	1.49082	0.420774	1.221	1.71179	3.00447	7.73366	0.043912	-0.811645
	804	0.825627	0.728867	0.936751	1.08693	0.751091	0.827916	0.814699	0.939986	1.17531	1.19488	0.174147	1.84924	0.372496	1.14044	2.86767	8.57137	15.3945	0.0458845	0.113406
	805	0.843689	0.779725	0.932061	1.06009	0.799264	0.828728	0.794456	0.944962	1.19804	1.12421	-1.90531	0.822164	1.62049	2.28125	2.17428	9.05652	16.6292	0.0378791	-0.0408669
	806	0.808416	0.72129	0.93607	1.10717	0.750789	0.849028	0.824949	0.947372	1.16695	0.986016	1.60732	1.24204	0.455487	0.447766	3.14385	19.7089	12.4658	0.00478139	-0.515328
	807	0.840722	0.773292	0.935395	1.07513	0.796092	0.818981	0.908361	0.908825	0.990787	1.48	-0.00851185	2.31672	0.314861	1.48101	3.49117	17.7283	1.5009	0.00191106	-0.390538
	808	0.846155	0.804235	0.930155	1.05637	0.826022	0.816434	0.902075	0.913321	1.04556	1.32968	-0.0347526	0.916545	0.715886	1.36744	1.89837	2.45306	6.26383	0.0534158	0.224824
	809	0.842622	0.767377	0.941048	1.08572	0.791937	0.802	0.727359	0.950321	1.26808	0.899476	2.42767	1.67413	0.750106	1.08607	2.002	16.9143	10.1963	0.0656766	0.122588
	810	0.815575	0.728914	0.937093	1.10263	0.757105	0.864508	0.876451	0.944594	1.11043	1.05612	-3.27899	1.08861	0.35897	1.1876	2.79484	12.4773	14.4127	0.0496889	0.44251
	811	0.813602	0.746051	0.935567	1.10661	0.778703	0.812427	0.89604	0.903367	0.961664	1.0706	0.73938	1.45412	0.461116	1.01552	1.70001	9.50135	6.95102	0.0322998	-1.20286
	812	0.806258	0.755224	0.933797	1.11295	0.79318	0.81059	0.890439	0.901818	0.95138	1.08274	-2.25587	0.929395	0.356916	2.47951	2.89197	6.87152	3.21717	0.053969	-0.318206
	813	0.820562	0.728916	0.935211	1.09126	0.753099	0.873833	0.865056	0.951089	1.12577	1.04822	0.656892	1.16647	0.481092	1.67386	2.02022	3.33896	19.754	0.0120032	0.142377
	814	0.841813	0.771137	0.927856	1.03404	0.78549	0.812201	0.77148	0.943297	1.22137	1.43987	-3.22165	0.960958	0.777037	1.60955	2.75275	6.49716	12.4289	0.00236739	0.420976
	815	0.844979	0.777974	0.93247	1.05757	0.796478	0.80752	0.735441	0.950525	1.25989	1.11262	3.5246	0.798946	1.15316	2.283	2.40477	12.3639	13.7025	0.0283925	0.800292
	816	0.817977	0.743516	0.937913	1.10548	0.774604	0.806306	0.805162	0.932298	1.1827	0.944458	0.636113	1.39083	0.863071	0.574738	2.60687	9.9107	17.118	0.0738645	-1.41204
	817	0.823656	0.752102	0.933618	1.09106	0.779194	0.825742	0.824049	0.936842	1.16422	1.06946	-2.52537	0.800248	0.644256	1.06062	3.22711	5.39508	14.9214	0.0627151	0.0524631
	818	0.845426	0.765269	0.933281	1.0511	0.78083	0.846537	0.907151	0.929473	1.06039	1.55758	-1.19199	1.40832	0.493427	1.02449	1.68856	10.1814	16.9943	0.0740483	0.378718
	819	0.827383	0.755078	0.930332	1.07753	0.778366	0.812033	0.820239	0.93137	1.16614	1.42063	-0.137713	1.0258	0.34527	1.24747	4.1383	16.3751	4.20812	0.0311635	0.555697
	820	0.813421	0.73861	0.938197	1.11018	0.771166	0.808723	0.850773	0.922478	1.12751	0.959467	1.79274	1.70817	0.668858	1.45262	2.51735	2.07465	10.3457	0.0910337	-1.70754
	821	0.837084	0.767618	0.927664	1.05135	0.785218	0.804721	0.771851	0.939898	1.22009	1.29406	3.50194	0.656027	1.58468	2.50115	3.05662	3.70033	19.9561	0.0228633	-0.271196
	822	0.805793	0.7206	0.938231	1.11423	0.752614	0.871129	0.93561	0.935616	0.999133	0.989569	-0.8323	1.54546	0.330772	1.69116	1.58952	18.7168	18.6006	0.0995186	-0.162152
	823	0.837101	0.760261	0.935551	1.07731	0.782414	0.822675	0.909938	0.914191	1.02735	1.2913	0.325148	1.98091	0.419813	2.09685	1.66697	17.5623	6.5876	0.0632984	-0.333248
	824	0.812703	0.748887	0.938031	1.1128	0.784379	0.848299	0.909443	0.930002	1.05745	0.924927	0.389672	0.818146	0.346208	2.05904	2.47324	1.87867	9.15107	0.0916252	1.00603
	825	0.829312	0.745269	0.930848	1.07071	0.765255	0.850749	0.907236	0.931736	1.06281	1.608	-2.89748	0.749006	0.464895	2.63856	3.14202	11.9492	15.3262	0.0708785	-0.10756
	826	0.812438	0.778071	0.928912	1.09991	0.815023	0.830506	0.901604	0.912408	0.955172	0.996767	-1.31868	0.563207	1.59486	2.01541	2.23579	10.2317	4.61194	0.0127129	-1.25386
	827	0.83607	0.785785	0.927432	1.06259	0.808415	0.886864	0.928415	0.947222	1.04836	1.08861	-2.51445	0.628079	1.95989	1.09116	1.40486	15.6226	10.3387	0.00764531	-0.0791798
	828	0.843082	0.776822	0.93233	1.06123	0.796334	0.860039	0.924288	0.93316	1.03556	1.42183	-0.592071	1.13349	0.458191	2.40108	2.07518	14.504	4.43355	0.0063755	0.098773
	829	0.849244	0.785126	0.931696	1.04458	0.801209	0.802033	0.770869	0.939013	1.22087	1.2792	-1.62699	1.02552	0.969131	1.35466	2.32684	7.93058	9.68883	0.015415	0.230447
	830	0.852392	0.831938	0.930046	1.04809	0.854951	0.803771	0.814488	0.928836	1.17132	1.12053	-0.140798	0.817639	2.80489	1.2248	1.87634	11.9994	7.50327	0.0718919	0.312318
	831	0.800409	0.711447	0.935889	1.11334	0.742497	0.821976	0.86897	0.924949	1.10741	1.06374	1.06542	1.4606	0.42333	1.29126	2.94373	13.7867	18.8948	0.0755048	-1.0629
	832	0.829306	0.807194	0.932878	1.09081	0.843725	0.802935	0.837145	0.922885	1.14344	0.914318	-3.37501	1.05985	1.97391	1.8241	2.42292	19.5417	3.90828	0.0895852	-0.715099
	833	0.808791	0.73147	0.936893	1.11125	0.763888	0.85494	0.925492	0.926685	0.98672	1.12168	-1.82074	0.896917	0.342616	1.52915	2.43439	15.2592	13.4289	0.0877154	-0.0674823
	834	0.818436	0.724095	0.929814	1.07783	0.744776	0.847105	0.805054	0.950752	1.18862	1.49233	-0.79201	0.851828	0.327943	2.72268	3.96632	6.1042	16.933	0.0425095	0.889973
	835	0.834082	0.794629	0.93229	1.08226	0.824429	0.838623	0.893581	0.928101	1.07846	1.00951	0.809187	0.61269	1.98624	1.06289	2.18683	19.3699	7.92503	0.0412394	-0.303657
	836	0.821869	0.734125	0.937044	1.09571	0.760073	0.868138	0.897514	0.942702	1.08497	1.15495	3.1729	1.10369	0.305581	2.35923	2.33898	5.35256	14.4662	0.050407	0.973852
	837	0.835102	0.780747	0.927207	1.06202	0.802701	0.823823	0.907352	0.910209	0.977168	1.39067	-3.62875	0.639447	0.976218	0.96192	1.78763	17.7532	16.4096	0.0846893	-0.613589
	838	0.833345	0.784246	0.932139	1.08117	0.811967	0.887111	0.834071	0.962725	1.16169	0.912448	3.61841	1.00887	1.75269	0.768979	1.8576	18.9157	11.7589	0.00185561	-0.206222
	839	0.840936	0.76227	0.937867	1.07801	0.784199	0.825937	0.84057	0.933325	1.14482	1.1442	-1.22809	2.14824	0.332882	2.07097	2.28279	19.3101	2.9347	0.0134251	0.861713
	840	0.816943	0.743427	0.938198	1.10725	0.775261	0.874004	0.868604	0.950554	1.12174	0.918883	2.31295	0.801239	0.420148	2.5092	2.61097	19.0567	7.98001	0.032216	0.775516
	841	0.811243	0.719756	0.934842	1.10038	0.746593	0.841605	0.827212	0.943493	1.16329	1.11329	-2.90545	1.37555	0.336356	1.71498	3.32817	6.70051	18.0433	0.0772121	0.37513
	842	0.833192	0.743811	0.933342	1.0699	0.762717	0.808491	0.840379	0.924884	1.14084	1.30597	-1.58245	1.42536	0.62692	0.963107	2.33154	16.2442	18.3805	0.0396332	-0.746916
	843	0.832507	0.749432	0.936016	1.08238	0.772175	0.874601	0.906357	0.935296	0.932307	1.55771	-1.41987	0.928403	0.311581	1.07807	1.95641	7.16095	11.866	0.0467092	0.316712
	844	0.830756	0.731767	0.931664	1.06022	0.747704	0.822713	0.802312	0.940481	1.18852	1.48527	0.0555758	1.43289	0.474694	2.41692	2.89152	14.1479	18.7216	0.0220698	-0.00267086
	845	0.819689	0.743444	0.931194	1.0883	0.769155	0.811356	0.770928	0.943025	1.22187	1.02532	-2.44102	0.936194	1.43572	2.18008	3.18063	4.17397	14.2698	0.00942477	-1.26395
	846	0.816573	0.755142	0.93312	1.1001	0.786781	0.887633	0.929003	0.947531	1.04783	0.914648	-1.62653	0.698456	1.75863	2.47624	1.75058	16.4062	12.2199	0.0173933	-0.85505
	847	0.847095	0.7878	0.930509	1.04755	0.80522	0.826995	0.906525	0.911414	0.970167	1.60009	0.201802	1.62544	0.464567	1.27084	1.11026	18.3923	7.33429	0.0972049	0.369892
	848	0.824858	0.736626	0.938298	1.09522	0.76232	0.808071	0.748449	0.947328	1.24598	0.92728	-2.94899	2.00307	0.681677	2.23289	2.38732	18.9357	12.5059	0.0811985	-0.862345
	849	0.821524	0.724879	0.931512	1.07732	0.745004	0.860288	0.853207	0.946889	1.13685	1.55215	-3.174	1.17209	0.314834	1.56986	3.68932	5.2722	12.4069	0.0141162	0.250152
	850	0.837486	0.743265	0.93522	1.06624	0.760566	0.87538	0.912659	0.943792	1.06685	1.64228	-0.542427	1.19692	0.355192	2.06869	2.43646	10.4766	16.9477	0.0615924	0.609106
	851	0.846912	0.798388	0.928148	1.04126	0.816199	0.800818	0.82242	0.925525	1.16121	1.33851	3.52066	0.817718	1.50117	1.21669	2.1742	12.7965	9.43501	0.0185589	-0.353677
	852	0.820951	0.727258	0.933876	1.08646	0.74992	0.817066	0.779704	0.943391	1.2129	1.1589	-0.979551	1.3777	0.440835	2.47277	3.1428	12.6364	17.9346	0.0544032	0.146683
	853	0.830713	0.788219	0.927316	1.07307	0.814991	0.799828	0.891183	0.897011	0.964868	1.28122	-2.22483	0.705386	0.928532	1.26719	1.93232	3.52966	10.7186	0.0935058	-0.757125
	854	0.831853	0.750788	0.938659	1.09076	0.776156	0.834096	0.83947	0.937317	1.14779	0.97477	0.121081	1.96942	0.651498	0.67596	1.65176	5.98036	10.9051	0.0314651	-0.939983
	855	0.801128	0.709119	0.924923	1.08773	0.733018	0.813532	0.826326	0.930608	1.15921	1.53389	1.43775	1.17348	0.362593	1.46356	4.45463	3.5893	19.1556	0.0463957	-0.562917
	856	0.83808	0.771309	0.932963	1.07186	0.7935	0.817175	0.76605	0.946745	1.22781	1.03896	-3.22247	0.937402	2.11548	1.39815	2.46523	12.0727	15.909	0.0271029	-0.646099
	857	0.841765	0.753427	0.934565	1.05947	0.769826	0.804278	0.86705	0.916268	1.10327	1.50798	-2.32156	2.3134	0.487157	1.33674	2.19039	8.44643	12.4021	0.0865384	-0.566988
	858	0.823065	0.748247	0.936401	1.09712	0.776613	0.865487	0.867046	0.946793	1.12184	0.959163	0.230909	0.724559	0.562788	1.67403	2.19046	15.7199	16.7112	0.0620311	0.799347
	859	0.839641	0.831601	0.926347	1.06085	0.861326	0.834407	0.88577	0.927591	1.08835	1.04241	1.17934	1.33294	1.94104	0.792406	1.63661	15	4.59514	0.00155219	-0.917433
	860	0.832997	0.777612	0.924851	1.05638	0.79843	0.82083	0.910785	0.911746	1.01306	1.30998	1.27847	0.878705	1.28244	1.25914	1.15475	16.5156	19.354	0.0478367	-0.968894
	861	0.829579	0.749702	0.93451	1.08333	0.77325	0.808299	0.763295	0.94366	1.2299	1.08727	-1.2034	1.03423	0.61215	1.11949	3.16681	5.17396	19.0915	0.0902844	0.301175
	862	0.843214	0.816352	0.924416	1.04193	0.837964	0.827391	0.909024	0.91206	0.976696	1.53114	-2.90854	0.885067	0.731914	0.81094	2.46327	3.35912	3.45927	0.00182217	-0.459659
	863	0.828934	0.7311	0.936327	1.08097	0.751612	0.808838	0.784112	0.938676	1.207	1.11184	-2.35166	2.51973	0.508539	2.49247	2.39182	5.01521	10.0401	0.0187593	-0.837626
	864	0.828499	0.765923	0.932525	1.08514	0.792661	0.810785	0.810959	0.932985	1.17676	1.06545	-2.17236	0.868555	0.944512	0.783172	3.29034	11.4791	7.15031	0.00756549	-0.699838
	865	0.836974	0.770447	0.931169	1.06783	0.791777	0.81038	0.895358	0.911875	1.05643	1.54735	1.14702	0.990497	0.477591	2.36339	3.11559	4.54833	5.40069	0.0404032	-0.369994
	866	0.836674	0.762984	0.928054	1.05107	0.780018	0.865878	0.868802	0.946622	1.11985	1.22829	-2.259	0.963244	0.827815	1.8397	1.30924	16.1008	15.472	0.00774565	0.377815
	867	0.845392	0.802301	0.929936	1.05666	0.82403	0.857376	0.824983	0.951096	1.16805	1.01557	-2.93819	1.0797	2.02182	2.51384	1.19861	13.0524	6.76774	0.00965538	0.0272327
	868	0.837507	0.784544	0.931098	1.07148	0.808781	0.866441	0.888628	0.931136	0.912471	1.50766	-2.11814	0.621464	0.343276	1.79046	2.03134	8.79445	2.91552	0.0125541	0.704542
	869	0.80104	0.744384	0.932614	1.11459	0.781671	0.816719	0.889859	0.917095	1.07251	0.967962	-3.25393	0.615864	0.816817	1.1507	3.36708	18.4707	8.67565	0.0411774	-1.00996
	870	0.832773	0.742215	0.932404	1.06638	0.760254	0.82886	0.904685	0.92004	1.05188	1.64299	-3.62626	1.38307	0.463705	1.06423	2.70497	4.34836	19.0027	0.0744705	-0.566003
	871	0.846912	0.781863	0.930189	1.04106	0.797457	0.80095	0.726533	0.950123	1.26888	1.20675	0.389302	0.795158	1.96952	1.41641	2.42542	7.69855	19.8448	0.0205328	0.385492
	872	0.8284	0.743553	0.932652	1.07747	0.764994	0.806117	0.899411	0.907662	1.0399	1.47586	-0.921071	1.22971	0.516133	1.0654	2.64987	1.43023	17.8714	0.0824055	-0.983577
	873	0.837503	0.745025	0.93535	1.06792	0.762894	0.815134	0.783233	0.941683	1.20877	1.26802	3.10949	1.62505	0.483356	1.45893	2.54265	8.04024	17.5355	0.0517604	0.337629
	874	0.837551	0.777527	0.932511	1.07359	0.801193	0.856598	0.891662	0.937845	1.08873	1.05662	0.395358	1.09606	0.853219	1.7191	1.2058	4.04505	16.4991	0.0753694	0.109151
	875	0.845689	0.809582	0.933033	1.06853	0.835446	0.830071	0.85789	0.931392	1.12445	1.0048	-2.25167	1.0457	1.45579	1.04514	1.33638	8.9576	10.0108	0.07861	0.0897412
	876	0.848238	0.801625	0.935412	1.06974	0.82588	0.824181	0.76577	0.949823	1.22879	0.965745	2.85749	0.937974	1.61685	1.78129	1.97132	13.3433	10.6463	0.0769621	0.558301
	877	0.8435	0.770739	0.936546	1.07253	0.791978	0.824054	0.740066	0.956152	1.25621	0.963749	3.02622	1.63267	1.031	0.467159	1.69487	3.41092	11.8069	0.0050932	-0.334067
	878	0.842555	0.801724	0.933943	1.07502	0.828766	0.860765	0.841195	0.949389	1.15052	0.926511	3.24479	0.906238	1.96915	1.33189	1.42735	11.1753	10.3284	0.0477883	0.324125
	879	0.847056	0.796162	0.933527	1.0644	0.818386	0.83115	0.797275	0.94541	1.19524	1.03138	2.12238	0.892914	1.24497	1.47596	1.95361	1.56761	8.9433	0.0181774	0.586823
	880	0.82475	0.785943	0.932352	1.09348	0.819708	0.80422	0.90264	0.902769	1.005	1.12639	-3.19101	0.912772	0.422485	0.832158	2.94129	14.8832	2.36489	0.0994921	0.455724
	881	0.8504	0.768617	0.934929	1.04476	0.782513	0.815436	0.812716	0.934764	1.17556	1.50903	-2.25774	2.10517	0.43772	1.92616	2.24112	7.80224	6.73619	0.0273841	0.703611
	882	0.819917	0.735998	0.93416	1.09249	0.761657	0.84698	0.842289	0.942811	1.14698	1.13701	-0.961416	0.84872	0.47111	1.70143	3.068	14.3292	18.7151	0.0802844	0.302823
	883	0.801461	0.722961	0.935748	1.1152	0.75638	0.852353	0.919249	0.924512	0.971324	1.19447	2.57779	0.651002	0.356217	0.587035	2.89294	8.23446	13.7306	0.0316534	-0.607125
	884	0.809313	0.739033	0.933434	1.10587	0.770947	0.807743	0.792014	0.936192	1.19796	0.956489	-0.0066492	0.955728	1.07909	2.68694	3.21001	6.93368	18.4852	0.0855702	-1.22358
	885	0.845188	0.786255	0.939975	1.08399	0.812838	0.806486	0.813466	0.930357	1.17305	0.948493	-1.80923	1.95231	0.600098	0.603114	1.98384	15.5489	3.02063	0.0290094	-0.0782899
	886	0.843991	0.820199	0.929067	1.06063	0.846309	0.813776	0.864639	0.921706	1.11042	1.10722	-1.50886	0.696351	2.94568	1.76527	2.14249	3.24101	9.05517	0.0970714	-0.100392
	887	0.817228	0.737269	0.935647	1.10003	0.765733	0.866179	0.842263	0.951726	1.15017	1.00106	2.47599	0.725454	0.502385	2.33893	2.89537	6.75208	17.5553	0.0547729	0.566063
	888	0.848079	0.782037	0.930648	1.039	0.797077	0.831432	0.873447	0.928766	1.1046	1.57831	2.88219	1.08846	0.654383	2.13287	1.94313	1.54636	13.1752	0.0509257	0.356244
	889	0.803298	0.711447	0.924086	1.08291	0.734244	0.811193	0.831048	0.928381	1.15302	1.64395	-0.313723	1.24086	0.358245	1.09054	4.57202	5.74847	16.5209	0.0385773	-0.697091
	890	0.829505	0.750279	0.939219	1.09528	0.777316	0.854283	0.855126	0.943682	1.13348	0.986826	1.52691	1.28359	0.506473	0.60224	2.0501	5.53871	19.7302	0.0941626	0.248016
	891	0.825673	0.726403	0.935653	1.08254	0.747211	0.840167	0.826048	0.943087	1.16438	1.32841	1.47972	1.74849	0.336937	1.02094	3.00464	15.9943	18.2449	0.0608874	0.424366
	892	0.838016	0.780243	0.935219	1.08117	0.80633	0.802993	0.69269	0.960154	1.30472	0.93312	1.78689	1.50165	1.63358	1.06621	2.89982	5.88602	8.09524	0.00190714	-0.960317
	893	0.829635	0.751723	0.934307	1.08346	0.775589	0.826919	0.887195	0.909748	0.932328	1.40801	-2.7252	1.54896	0.391938	0.412974	1.56873	7.05861	16.2377	0.094796	-0.452883
	894	0.843037	0.787005	0.926628	1.03758	0.803604	0.807013	0.825534	0.927681	1.15877	1.34024	0.372015	0.74235	2.94906	2.5333	2.05686	15.189	14.6166	0.0171688	-0.763017
	895	0.831169	0.763105	0.936678	1.09063	0.790489	0.861582	0.896208	0.93957	1.08439	1.00849	-3.58116	1.05228	0.535485	1.21547	1.92621	12.345	9.93791	0.0512053	0.407755
	896	0.823259	0.765446	0.934517	1.09682	0.796643	0.847997	0.863053	0.939078	1.12265	0.978431	0.0219157	0.538333	0.874838	1.69534	2.95504	16.3276	12.4813	0.0986905	0.271798
	897	0.815318	0.819027	0.922654	1.08513	0.860281	0.821083	0.878549	0.906345	0.922676	0.951845	3.36429	0.725044	2.00037	1.60505	1.23816	10.9242	2.68948	0.0276406	-0.444633
	898	0.81569	0.737763	0.932613	1.0956	0.76529	0.823591	0.906956	0.910061	0.976161	1.15776	2.35985	1.52596	0.508339	2.01162	1.32394	14.6256	14.0983	0.0626522	-1.21074
	899	0.809597	0.752226	0.93885	1.11797	0.790871	0.838723	0.908422	0.924808	1.05228	0.914359	-0.166951	0.963087	0.324642	1.19956	2.92293	14.2744	4.24495	0.0650057	0.621004
	900	0.845478	0.788102	0.927337	1.03019	0.803253	0.82615	0.815651	0.938938	1.17394	1.33115	-0.791918	0.967357	1.18493	1.966	1.40053	4.13719	18.1165	0.0243559	0.584735
	901	0.841964	0.777076	0.928064	1.0434	0.793512	0.80803	0.836706	0.925505	1.14531	1.46656	0.268364	0.715984	1.17651	2.14101	2.55691	12.0325	16.8755	0.0455096	-0.366518
	902	0.839857	0.7951	0.933349	1.07647	0.821971	0.84578	0.872512	0.936094	1.11031	1.01319	-1.21543	0.719827	1.98319	0.500641	1.96378	13.6787	18.0007	0.0983335	-0.0907225
	903	0.840891	0.785506	0.936595	1.08157	0.812027	0.846352	0.789662	0.953769	1.20519	0.905228	-2.04576	1.11826	2.24623	1.50032	1.65741	19.2639	13.5544	0.0614715	-0.299322
	904	0.841506	0.749732	0.936365	1.06513	0.766885	0.823333	0.851062	0.929695	1.1313	1.42884	-0.898371	1.79174	0.413693	0.812623	2.20229	18.1009	17.1822	0.0860176	0.441573
	905	0.820947	0.726593	0.935968	1.09152	0.75045	0.823447	0.803354	0.94057	1.18745	1.12883	-3.41614	1.77872	0.390189	0.780796	3.04889	9.58196	17.9967	0.0628666	0.0637171
	906	0.829302	0.738513	0.932928	1.07384	0.758289	0.806911	0.892904	0.910599	1.05897	1.53587	0.365677	1.51939	0.475348	1.52458	2.65821	3.64492	16.1415	0.0664072	-0.983214
	907	0.842741	0.753977	0.936589	1.06577	0.771569	0.836633	0.879917	0.930042	1.0976	1.6028	-0.4741	1.83777	0.35942	0.690682	2.75647	14.4526	10.9675	0.0786435	0.315457
	908	0.845164	0.786431	0.935516	1.07163	0.809416	0.821397	0.784289	0.944168	1.20836	1.0331	2.51741	1.00274	0.868709	1.93158	2.14034	8.57768	12.2731	0.0995311	0.726638
	909	0.827298	0.789179	0.93109	1.08788	0.821187	0.835441	0.91784	0.918999	1.01375	0.998866	0.77121	0.818837	1.43384	1.01252	1.42149	14.1799	12.3074	0.0889652	-0.676771
	910	0.840683	0.772627	0.934611	1.07256	0.794675	0.8441	0.748204	0.962448	1.24898	0.951497	-2.55031	1.05997	2.50968	1.18745	1.98456	4.8217	18.9704	0.0164431	-0.270837
	911	0.818315	0.721716	0.929632	1.07604	0.741722	0.806976	0.851836	0.921383	1.12559	1.61128	-3.67497	2.17001	0.386009	2.16263	3.5969	11.3955	14.8098	0.0932725	-0.785416
	912	0.836153	0.750121	0.939933	1.08711	0.773628	0.845548	0.858189	0.938916	1.12798	1.02095	-2.11623	2.59796	0.372459	0.843668	1.65527	17.0603	8.93773	0.0669499	0.407941
	913	0.805563	0.716832	0.935444	1.10802	0.746328	0.828424	0.830055	0.936734	1.15773	0.977369	0.244038	1.36742	0.762489	1.86738	2.53601	18.5702	15.6349	0.0208405	-1.74463
	914	0.821311	0.734612	0.938136	1.09912	0.761716	0.850005	0.820524	0.948765	1.17201	0.978689	-2.00303	1.23807	0.382075	2.04203	2.63341	11.1585	14.6759	0.0677351	0.840881
	915	0.819423	0.730755	0.937652	1.09931	0.757629	0.850011	0.783565	0.956793	1.21208	0.94576	3.42906	1.14434	0.424741	2.48405	2.74158	4.65732	17.8442	0.0455382	0.828021
	916	0.837977	0.791614	0.928615	1.06462	0.815195	0.823652	0.902199	0.917645	1.05275	1.23224	-1.94795	0.548977	1.63148	1.19748	2.26256	16.608	10.5653	0.047497	-0.529255
	917	0.836232	0.75415	0.930572	1.05799	0.771397	0.838602	0.80185	0.947687	1.19112	1.30294	-1.85999	0.923441	0.644737	2.4671	2.75604	6.71135	12.1123	0.00423775	0.223328
	918	0.841856	0.79965	0.932442	1.0715	0.825462	0.811439	0.858507	0.921998	1.11805	1.09752	1.01042	0.914936	1.15321	1.785	1.99292	5.96133	9.28381	0.0877735	-0.172394
	919	0.823026	0.752873	0.933631	1.0922	0.780533	0.801978	0.814219	0.928081	1.1713	1.04279	-0.506336	1.08142	1.16658	2.31177	2.6329	7.47153	17.134	0.0827864	-1.38995
	920	0.843622	0.760799	0.931534	1.04173	0.774638	0.807811	0.809557	0.93201	1.17789	1.61222	-3.44871	1.33523	0.533448	1.84957	2.49412	17.7519	16.8723	0.0841699	0.746191
	921	0.846079	0.803135	0.92553	1.02628	0.819669	0.808841	0.820438	0.929776	1.16526	1.36365	3.47458	0.830553	2.4107	1.7553	1.63246	7.99406	13.6105	0.0188336	-0.195472
	922	0.839015	0.7933	0.934908	1.08154	0.821562	0.829047	0.797803	0.944301	1.19437	0.937165	-2.76941	1.25911	2.52739	2.07017	1.79331	19.2275	7.57999	0.047618	-0.96326
	923	0.819467	0.774703	0.930054	1.09356	0.807356	0.872246	0.912236	0.934047	0.942097	0.972446	-3.74906	0.619475	0.862171	0.912323	1.22369	10.0501	15.5381	0.0892589	0.150743
	924	0.813493	0.724633	0.934793	1.09899	0.75145	0.837667	0.902043	0.925745	1.06389	1.15908	3.67958	1.25336	0.481693	1.19519	2.27069	19.3425	16.3503	0.0304266	-0.97029
	925	0.837246	0.773821	0.932888	1.07408	0.797107	0.801735	0.899	0.90476	1.03362	1.35239	3.03328	1.11895	0.567925	1.01298	2.20653	7.45079	9.74402	0.0863911	-0.483172
	926	0.816507	0.75438	0.935923	1.10565	0.787725	0.868916	0.920046	0.93258	0.957021	0.984053	0.437362	0.917581	0.404834	0.998913	1.43274	17.2406	10.5249	0.0720942	0.38605
	927	0.831718	0.743388	0.939515	1.09044	0.767596	0.823849	0.851442	0.929894	1.13098	1.04666	-2.13523	2.64777	0.303793	1.56018	1.82725	12.2594	7.48514	0.0468924	0.820991
	928	0.844835	0.785005	0.937932	1.07885	0.80986	0.838107	0.829858	0.941303	1.1597	0.970254	-1.08041	1.85931	0.551939	0.952252	2.01197	17.896	2.99891	0.00464863	0.22809
	929	0.83657	0.751309	0.934373	1.07038	0.77068	0.844019	0.910639	0.927259	1.05191	1.42656	-2.7853	1.50306	0.429385	2.24376	2.08598	5.64476	13.1866	0.0622936	-0.0104907
	930	0.825972	0.748032	0.935802	1.09164	0.774236	0.866072	0.906805	0.93999	1.0713	1.10717	1.17109	0.919682	0.440752	1.2323	2.11454	5.56027	18.0679	0.0801013	0.59403
	931	0.827678	0.775086	0.935413	1.09494	0.806605	0.844532	0.870636	0.935845	1.11234	0.926169	0.204253	1.19821	1.49009	1.91196	1.61767	5.67464	11.6218	0.0706557	-1.15985
	932	0.831864	0.733693	0.934611	1.07087	0.751762	0.827637	0.862518	0.929302	1.11791	1.46025	2.52615	1.72705	0.302285	1.14641	2.05654	15.8879	13.5154	0.00388851	0.610613
	933	0.812859	0.73398	0.932358	1.09772	0.762002	0.815284	0.89313	0.915427	1.06533	1.18216	3.04532	0.952479	0.631848	1.69507	2.70149	9.74906	15.7821	0.0452978	-1.31253
	934	0.832324	0.751053	0.93385	1.07716	0.772744	0.820455	0.852134	0.928022	1.12916	1.18295	-2.73376	1.63188	0.607464	1.35138	2.32375	12.4585	7.30447	0.00580809	-1.03742
	935	0.837803	0.770817	0.938528	1.08757	0.797323	0.821855	0.855984	0.927838	1.12463	1.09166	0.71738	2.19308	0.339215	1.73709	2.84342	8.5439	2.41832	0.0757142	0.622523
	936	0.835806	0.772548	0.935375	1.08305	0.798354	0.799889	0.759245	0.94111	1.23344	0.979086	2.69038	0.741409	1.0284	0.965543	2.75249	18.2372	12.202	0.0449603	0.569877
	937	0.809891	0.748567	0.930231	1.10095	0.780546	0.841104	0.858506	0.91783	0.884811	1.20808	-3.58284	0.804727	0.449002	0.639697	2.12163	5.00555	7.19606	0.00380399	-1.08728
	938	0.836997	0.766127	0.936333	1.08181	0.790356	0.806389	0.798269	0.934075	1.19066	1.0928	-1.39716	1.1624	0.577947	1.04754	2.86877	5.52004	10.0318	0.0628319	0.264772
	939	0.806134	0.721198	0.93214	1.10202	0.749567	0.801397	0.729125	0.949607	1.26615	0.955308	3.60009	1.16281	1.20756	0.860212	3.42212	16.4742	17.7712	0.00548988	-1.67195
	940	0.807582	0.747891	0.934744	1.11212	0.78383	0.847983	0.886546	0.934429	1.09259	0.915444	2.90367	0.710526	1.15342	2.46949	2.64619	10.4648	15.6088	0.0731087	-0.955696
	941	0.847389	0.789878	0.930672	1.04882	0.807745	0.821903	0.835644	0.932414	1.14982	1.29739	-0.353953	0.872084	1.0195	1.63615	2.1023	1.45937	14.0466	0.0471453	0.20503
	942	0.846234	0.788653	0.93589	1.07149	0.811726	0.828884	0.844278	0.93382	1.14096	1.02218	-1.96178	1.36377	0.796027	0.600758	1.299	16.535	11.0741	0.0732746	0.286974
	943	0.835928	0.754909	0.939451	1.08795	0.779391	0.802451	0.803899	0.930869	1.18351	1.03492	2.97827	2.1503	0.508863	1.05938	2.26129	17.7496	6.88877	0.0568475	-0.474289
	944	0.806229	0.716541	0.93439	1.10495	0.744989	0.864242	0.931888	0.931979	0.996485	1.3826	-0.74148	0.668591	0.324092	1.78543	3.13794	7.24254	14.7488	0.0313437	-0.443824
	945	0.815479	0.769048	0.935124	1.10752	0.806171	0.845321	0.91535	0.926734	1.0424	0.89338	-3.69895	0.776957	1.37141	0.993265	2.05361	17.2009	12.6009	0.0852067	-0.832785
	946	0.828414	0.743331	0.931821	1.07476	0.764114	0.849679	0.900827	0.932493	1.07265	1.52711	1.4809	0.793564	0.438075	1.37696	3.19616	12.5691	9.16246	0.0127184	-0.432196
	947	0.821076	0.751145	0.931021	1.08831	0.7778	0.853026	0.849953	0.944066	1.13923	1.02274	-2.8893	0.550806	2.28751	1.61789	3.09773	7.67157	14.4147	0.0118546	-0.883018
	948	0.830724	0.760155	0.934576	1.08529	0.785592	0.820732	0.760628	0.949658	1.23402	1.01064	2.71308	0.859174	0.687634	1.83459	3.0818	4.74443	15.3904	0.083499	0.691033
	949	0.837869	0.779405	0.932809	1.07448	0.80353	0.835327	0.849026	0.935857	1.13667	1.04389	-3.59481	1.12217	1.27133	1.95499	1.64363	3.5336	16.0321	0.0769815	-0.547117
	950	0.839759	0.769229	0.932646	1.06646	0.78952	0.826905	0.867833	0.927686	1.11063	1.37133	-0.161208	0.831978	0.608139	0.555484	2.86376	6.29989	12.2478	0.0385958	0.00479207
	951	0.841504	0.759856	0.936246	1.0707	0.779533	0.845529	0.922687	0.92411	1.01477	1.37529	-3.22636	2.90269	0.354798	0.44523	1.48608	15.5014	6.71984	0.0311206	-0.101543
	952	0.849617	0.810606	0.929328	1.04562	0.830312	0.818544	0.845291	0.928605	1.13725	1.25713	3.27121	0.765462	1.36393	0.895768	1.88035	14.7775	10.0519	0.0494211	0.343022
	953	0.815287	0.737338	0.935892	1.10306	0.767063	0.887016	0.943502	0.944081	1.00807	1.10585	1.61437	0.618083	0.40589	0.963419	2.25252	11.0755	18.3637	0.0609841	0.417113
	954	0.803658	0.716975	0.93352	1.10662	0.746393	0.858165	0.907269	0.935721	1.06684	1.1012	1.46154	0.859463	0.485341	1.84458	2.77958	1.11308	19.9295	0.0219513	-0.721435
	955	0.828629	0.728467	0.933351	1.07021	0.74631	0.809752	0.761057	0.944871	1.2325	1.34313	0.623724	1.84541	0.403219	2.70618	3.13425	4.60086	19.25	0.0473462	0.386255
	956	0.842743	0.802078	0.933211	1.07272	0.828463	0.854404	0.842571	0.946164	1.14794	0.954058	-3.73922	0.91517	2.99281	1.12598	1.63243	6.77178	12.8936	0.054239	-0.113248
	957	0.829096	0.758808	0.9352	1.0889	0.785358	0.809164	0.737414	0.950635	1.2579	0.945559	-1.77224	1.17039	2.20728	1.48206	2.56294	17.0764	16.4161	0.0409425	-1.24691
	958	0.830481	0.756095	0.935064	1.08562	0.781044	0.839013	0.73106	0.964547	1.26659	0.914268	-3.00886	1.12124	2.75414	1.31412	2.45947	4.02476	19.3372	0.0121905	-0.846846
	959	0.84088	0.753836	0.933622	1.05805	0.770173	0.854943	0.862527	0.942569	1.1249	1.62291	3.1854	1.13495	0.39539	1.26513	2.90919	2.76953	10.6037	0.0163387	0.46793
	960	0.808376	0.724079	0.928562	1.09191	0.749839	0.804923	0.797795	0.933519	1.19096	1.35248	1.19983	1.50697	0.308906	1.92638	4.33131	10.533	11.0898	0.0872748	0.214325
	961	0.826348	0.771814	0.933016	1.09074	0.801635	0.838734	0.841675	0.91742	0.864917	1.31778	0.414835	0.89642	0.311893	1.2134	1.57676	8.18398	4.50776	0.0423392	0.4241
	962	0.832962	0.756701	0.9316	1.07144	0.77771	0.834498	0.829233	0.939753	1.15979	1.16404	-3.43202	0.896308	0.915129	1.92371	2.47662	3.8988	19.7483	0.0385715	-0.263482
	963	0.830905	0.762151	0.933437	1.08266	0.78714	0.860941	0.923394	0.928977	0.971291	1.48936	1.96123	1.08363	0.332584	1.16021	3.18593	7.91732	4.50229	0.00196487	-0.450208
	964	0.845756	0.791161	0.927523	1.03514	0.807319	0.821114	0.786259	0.943575	1.20616	1.32449	-3.54033	0.962128	1.07745	0.932485	2.47943	2.76302	10.6887	0.00222655	0.201499
	965	0.852359	0.818739	0.933828	1.06037	0.842419	0.826704	0.791612	0.944714	1.20092	0.959762	-0.302992	1.31907	1.35012	2.17753	1.13703	7.30297	5.60723	0.0544003	0.617488
	966	0.825844	0.738789	0.935159	1.08684	0.762334	0.876485	0.908564	0.945037	1.07307	1.22043	0.631823	0.898157	0.417437	1.7616	2.21115	18.1235	19.544	0.0662757	0.499257
	967	0.833142	0.794343	0.934088	1.08778	0.826089	0.825799	0.911193	0.915798	1.02823	1.05643	-0.459118	1.00164	0.504787	1.51002	2.32255	8.6959	2.07034	0.0271098	0.370056
	968	0.847358	0.799054	0.929555	1.0483	0.81811	0.800868	0.781752	0.935686	1.20856	1.23312	1.52894	0.613757	2.2287	1.53091	2.72452	17.5346	15.3808	0.0956731	0.244637
	969	0.844643	0.771298	0.93197	1.05175	0.787872	0.810383	0.832631	0.927686	1.15094	1.49275	3.41707	0.905509	0.558336	1.62108	2.44135	17.4724	11.6651	0.0524411	0.748782
	970	0.846163	0.82501	0.924543	1.03568	0.846199	0.800611	0.893742	0.897867	0.970679	1.52249	0.768895	1.27923	0.604725	1.38827	1.26004	2.437	2.22443	0.0237003	0.358235
	971	0.806036	0.717798	0.928559	1.09287	0.743273	0.801907	0.789156	0.934317	1.20035	1.28674	1.16761	1.34447	0.363965	1.65622	4.1033	16.9668	16.024	0.0815729	-0.0849197
	972	0.837093	0.772673	0.924271	1.02991	0.787754	0.837051	0.90047	0.925758	1.06629	1.55777	-3.03938	1.02777	0.864917	1.76655	1.39208	16.4973	12.9987	0.00442921	-0.41398
	973	0.835666	0.765335	0.935244	1.08078	0.789407	0.836754	0.840631	0.938354	1.14696	1.09235	-0.0100103	0.962942	0.688547	2.49737	2.28601	10.4095	14.0252	0.0809356	0.18474
	974	0.815304	0.743438	0.934586	1.10198	0.773849	0.842852	0.893002	0.930509	1.08136	1.06089	-3.25979	0.910074	0.493496	2.19167	2.81218	4.67335	14.1065	0.0973968	-0.122674
	975	0.829362	0.748995	0.935224	1.08532	0.773003	0.855188	0.926924	0.929104	1.01772	1.54749	0.205201	0.924214	0.31854	2.60925	3.03218	10.697	9.22954	0.0975158	0.313594
	976	0.833061	0.78622	0.937174	1.09374	0.818428	0.82113	0.840584	0.93088	1.14365	0.919194	0.767589	1.76512	1.06194	1.77933	1.98139	6.95162	3.56358	0.0966217	-1.2829
	977	0.81647	0.736548	0.929162	1.08566	0.761146	0.807115	0.884608	0.913159	1.07599	1.36349	-2.7531	0.810549	0.601742	1.09023	3.4576	2.1938	15.5513	0.0374452	-1.16378
	978	0.826359	0.755468	0.938651	1.09957	0.78525	0.843695	0.820773	0.945796	1.17083	0.91358	0.904821	1.02715	0.692584	1.69482	2.33571	9.9636	16.011	0.0991551	0.142231
	979	0.807288	0.711684	0.933439	1.09961	0.737753	0.829002	0.914878	0.914982	1.00422	1.53832	2.23741	1.40022	0.326419	2.29391	3.09864	7.15269	18.0177	0.075726	-1.04743
	980	0.837459	0.758798	0.935312	1.07532	0.780179	0.823552	0.760388	0.950903	1.23453	1.04841	0.734114	1.00785	0.854417	2.12802	2.43419	7.45458	17.7766	0.0405157	0.282599
	981	0.833148	0.742715	0.931445	1.06183	0.759849	0.817851	0.747842	0.95165	1.24748	1.21205	-2.34668	0.931619	0.640319	2.27712	2.77156	16.9699	17.9329	0.0151053	0.734512
	982	0.807893	0.720799	0.9337	1.10284	0.749037	0.826021	0.908845	0.91697	1.03762	1.27547	0.883047	1.21695	0.383091	2.25269	2.99588	4.59279	11.2417	0.0271879	-1.06045
	983	0.841749	0.825466	0.932378	1.0745	0.857384	0.810489	0.833634	0.927376	1.14968	0.956244	1.29426	1.02008	2.68543	1.52988	1.78535	19.6347	5.28218	0.0922407	-0.262844
	984	0.823961	0.746633	0.930505	1.08071	0.770107	0.823772	0.900393	0.918264	1.05693	1.36755	0.604051	0.718297	0.655709	1.61238	2.86339	11.2898	17.313	0.0625137	-0.83721
	985	0.844384	0.814199	0.928011	1.05478	0.83771	0.803512	0.853294	0.919235	1.12247	1.20212	2.20014	0.609746	2.78196	1.71391	2.43372	7.49468	8.71462	0.0642658	-0.223941
	986	0.82744	0.769877	0.932958	1.0887	0.798521	0.811544	0.780506	0.940702	1.21133	0.978151	2.92219	0.854796	2.74022	1.90402	2.82246	14.9627	17.4549	0.0889533	-1.03562
	987	0.840268	0.770385	0.9334	1.06852	0.791212	0.844536	0.830178	0.944166	1.16038	1.04267	-1.57768	1.34254	1.05267	1.05517	1.24081	10.3868	15.5907	0.0281084	-0.340675
	988	0.841896	0.816766	0.930776	1.06923	0.845113	0.818685	0.849545	0.927652	1.13192	1.00488	3.26927	1.14743	2.04016	1.9936	1.34261	13.8476	5.64007	0.0538518	-0.536644
	989	0.831337	0.767504	0.932074	1.07995	0.792517	0.857551	0.853314	0.945538	1.1362	1.01814	-3.16562	0.812318	1.98679	1.59918	2.16654	2.84081	16.1625	0.0187381	-0.750635
	990	0.836045	0.751465	0.936042	1.07695	0.772496	0.821173	0.81144	0.937665	1.17796	1.19961	-2.90638	1.59083	0.437159	1.56211	2.77356	6.01595	11.3464	0.0713725	0.434034
	991	0.844262	0.749483	0.935906	1.05451	0.764035	0.814937	0.768886	0.945129	1.22451	1.22297	-1.62867	2.64586	0.50594	1.10758	1.59019	10.2613	15.5402	0.0331218	0.362414
	992	0.824255	0.745917	0.937568	1.09744	0.773801	0.823231	0.863314	0.926852	1.11547	1.03225	3.64417	1.58677	0.560834	1.44406	2.12236	11.873	9.22853	0.0408537	-0.9056
	993	0.829479	0.789036	0.934197	1.09204	0.821941	0.809469	0.893421	0.91195	1.06005	1.02281	-1.80477	1.05903	0.581294	2.17887	2.5188	16.9946	2.07655	0.0424956	-0.0276628
	994	0.837972	0.791168	0.93307	1.07791	0.818174	0.813087	0.844855	0.926034	1.13638	1.08263	1.55084	0.77407	0.983124	2.00397	2.50117	18.2998	7.6232	0.0787023	0.0460497
	995	0.836248	0.797547	0.930192	1.07394	0.824939	0.835336	0.913246	0.921283	1.03647	1.08649	-1.36051	0.689396	1.4855	1.08207	1.71764	13.0059	8.44822	0.0381551	-0.36974
	996	0.836474	0.787823	0.93072	1.07304	0.813225	0.830038	0.867728	0.929282	1.11178	1.23318	-1.65171	0.582024	0.623885	2.20545	3.27393	19.0819	3.62234	0.0439836	0.55796
	997	0.847988	0.793104	0.929563	1.04227	0.810111	0.826429	0.802451	0.942096	1.18887	1.24894	-3.5017	0.725606	1.52842	1.52191	2.14002	16.6497	14.5731	0.0446845	0.508366
	998	0.832806	0.748183	0.93485	1.07794	0.769583	0.84021	0.892377	0.929281	1.08113	1.45775	-3.60337	2.16979	0.325997	1.06759	3.33008	19.3108	3.68909	0.00578748	-0.454539
	999	0.822535	0.749478	0.940915	1.10743	0.781531	0.863064	0.922028	0.935417	1.04369	0.91879	-1.22974	2.01981	0.308458	1.28541	1.8198	9.2397	4.78536	0.0341595	0.398072
	1000	0.822027	0.785118	0.936329	1.10443	0.823325	0.815746	0.905268	0.911669	1.03423	0.888505	2.77381	1.3836	0.400765	1.17286	2.14903	8.11128	1.44796	0.0421016	0.656046
	1001	0.845313	0.775295	0.929092	1.02807	0.788632	0.806094	0.836675	0.924607	1.14488	1.53787	0.0085826	1.50386	0.77138	1.29437	1.47119	4.33813	15.3197	0.0172566	-0.110391
	1002	0.825033	0.73696	0.929767	1.07154	0.756814	0.809108	0.800197	0.934824	1.18887	1.37871	-0.295819	0.994542	0.550624	0.593248	3.61571	7.48505	19.7758	0.0294655	-0.267246
	1003	0.841416	0.757175	0.935889	1.06821	0.775945	0.813993	0.886839	0.916405	1.07627	1.62541	-1.62112	2.26681	0.360205	1.05217	2.96607	11.8762	6.78382	0.0957533	-0.168101
	1004	0.848101	0.776322	0.931196	1.03566	0.790176	0.805597	0.79046	0.935661	1.19942	1.51228	1.70583	1.16925	0.701432	2.24479	2.30942	8.50889	12.6979	0.0374341	0.470952
	1005	0.80136	0.720528	0.932129	1.10784	0.751267	0.827533	0.905836	0.918901	1.04785	1.31447	-2.18489	0.908858	0.314125	1.33316	3.84583	19.4081	7.07769	0.0258522	-0.660221
	1006	0.841964	0.774123	0.93649	1.07643	0.797158	0.816806	0.872517	0.921488	1.10044	1.30495	2.03349	1.78403	0.35524	1.36175	2.86367	13.9757	3.20437	0.0745456	0.557297
	1007	0.819976	0.732142	0.93671	1.09693	0.758448	0.871883	0.935968	0.936701	1.00966	1.25231	0.310982	1.08516	0.344525	0.326116	2.3178	3.25843	19.0106	0.028143	-0.0291456
	1008	0.82472	0.745288	0.938176	1.09797	0.773157	0.839598	0.806081	0.947146	1.18658	0.922637	-0.448581	1.2674	0.882795	1.19077	2.12989	15.5207	15.0366	0.0348062	-0.732665
	1009	0.827878	0.753993	0.936626	1.09266	0.781101	0.815542	0.735005	0.953951	1.26096	0.919716	2.7255	0.936692	0.768964	1.23788	3.03815	3.49665	16.7797	0.0536433	0.524876
	1010	0.821874	0.740035	0.936786	1.09713	0.767297	0.808466	0.821486	0.929388	1.16396	1.06929	-2.91741	1.48487	0.467921	0.548488	3.00495	17.4425	12.5522	0.0672743	-0.365774
	1011	0.811928	0.744393	0.934472	1.10606	0.77686	0.849257	0.86667	0.922148	0.89176	1.17944	-0.298712	0.90043	0.325862	2.39792	1.68506	1.71508	10.8883	0.0707474	0.0377055
	1012	0.83452	0.809434	0.928148	1.07271	0.839173	0.858909	0.929482	0.930435	1.01155	1.07111	-2.83793	0.72436	0.821797	2.47802	1.99719	3.06119	2.73275	0.00698055	0.410674
	1013	0.820824	0.735903	0.936474	1.09652	0.762522	0.851728	0.792069	0.955612	1.20314	0.940388	3.27738	0.992723	0.725902	1.49678	2.49102	16.7448	16.9618	0.0201583	-0.0499721
	1014	0.822997	0.722486	0.934371	1.08163	0.743012	0.85755	0.832743	0.949655	1.1595	1.41155	2.65532	1.43525	0.300796	2.01669	3.18501	15.3102	14.0287	0.0246368	0.602466
	1015	0.815335	0.741237	0.935979	1.10423	0.771973	0.826622	0.793568	0.944267	1.19877	0.952832	0.649628	0.907133	0.48248	2.10227	3.34936	14.3057	10.5291	0.0562313	0.423126
	1016	0.832815	0.748986	0.936445	1.08285	0.771736	0.86681	0.925124	0.931863	0.968957	1.55481	-0.924699	0.980712	0.322745	1.35878	2.31667	9.77309	12.379	0.082896	0.315117
	1017	0.839325	0.792765	0.935787	1.08321	0.821395	0.808799	0.735364	0.951043	1.26007	0.886666	-3.31789	0.870979	1.4778	1.99898	2.80441	6.31424	9.80873	0.0979624	0.710358
	1018	0.830938	0.767856	0.937281	1.09347	0.796974	0.800557	0.844956	0.919869	1.13273	1.08803	0.367585	1.78219	0.358569	1.52701	3.33573	5.18593	2.96276	0.0954881	0.368396
	1019	0.83908	0.772407	0.92876	1.05398	0.790693	0.826615	0.807046	0.941101	1.18374	1.19899	3.55823	0.978253	1.54684	1.17653	2.00788	4.75814	16.0378	0.00459927	-0.692177
	1020	0.825227	0.741932	0.934497	1.08739	0.766183	0.893574	0.944399	0.946223	0.985875	1.31245	-1.3779	0.666751	0.350994	1.54284	1.98532	6.88082	13.0126	0.0226689	0.610424
	1021	0.834329	0.752929	0.931971	1.0678	0.77236	0.837082	0.9186	0.918601	0.999494	1.64053	2.61124	0.902031	0.486011	1.3046	2.35285	18.9882	11.5278	0.031822	-0.681793
	1022	0.823579	0.776597	0.930698	1.09001	0.807637	0.829727	0.912017	0.918156	1.03229	1.0596	0.880212	1.0807	0.905285	1.94702	2.17286	11.969	4.33048	0.00432479	-1.35834
	1023	0.837215	0.745587	0.930415	1.04347	0.75918	0.807824	0.794299	0.935715	1.1954	1.60236	-3.38543	1.65494	0.543673	1.78316	2.78879	11.8322	14.1554	0.017345	-0.156569
	1024	0.822522	0.718334	0.934814	1.08136	0.738338	0.831912	0.838812	0.936471	1.14814	1.45949	0.785259	2.59846	0.32951	1.99251	3.07956	10.7194	18.2663	0.0880844	-0.17512
	1025	0.8369	0.792675	0.933233	1.08025	0.820876	0.847647	0.861255	0.939244	1.12474	0.960412	1.92038	1.0406	1.75882	2.35134	1.43316	7.72757	10.8431	0.0612853	-0.478597
	1026	0.831496	0.7623	0.935058	1.08598	0.788123	0.835292	0.808807	0.94459	1.18299	0.978186	3.60534	1.45461	1.52479	0.95087	1.73708	5.77637	12.4848	0.0137919	-1.61069
	1027	0.814369	0.731904	0.933814	1.09818	0.759467	0.801094	0.799204	0.931402	1.18872	1.02663	-1.73503	1.20598	0.999383	1.03722	2.89922	6.9586	18.9561	0.0288838	-1.69314
	1028	0.836975	0.746371	0.933372	1.06232	0.763348	0.86091	0.929249	0.932119	1.01995	1.57849	0.403871	1.52292	0.403502	1.15259	1.68032	15.9814	13.0631	0.0174934	-0.156835
	1029	0.832888	0.747906	0.931845	1.06771	0.76693	0.821403	0.831959	0.933025	1.15412	1.38627	-2.60434	1.06404	0.553464	1.40649	2.97018	12.8714	19.3785	0.0913436	0.0274244
	1030	0.833292	0.74664	0.939037	1.08802	0.770376	0.826672	0.813412	0.939717	1.17658	1.10566	-1.10988	2.05672	0.348784	2.16271	2.74235	8.60588	8.49929	0.0878458	0.594351
	1031	0.843027	0.758593	0.931665	1.04279	0.772454	0.805131	0.760251	0.943088	1.2329	1.3546	-0.541849	1.33454	0.710857	2.14348	2.15259	16.839	13.6318	0.0104376	0.243113
	1032	0.83865	0.762741	0.932541	1.06533	0.782118	0.824669	0.873211	0.925371	1.1025	1.37679	0.698965	1.12254	0.557332	1.88126	2.43802	18.1953	6.91124	0.0160427	-0.362563
	1033	0.826897	0.736729	0.935337	1.08466	0.759243	0.848543	0.911053	0.929716	1.05451	1.26444	-2.17249	1.47571	0.418429	1.23523	2.07572	10.2653	13.2301	0.0266917	-0.368452
	1034	0.838173	0.784387	0.934347	1.07958	0.810671	0.804786	0.893844	0.908993	1.05465	1.29387	2.86057	1.30008	0.396915	1.22629	3.01924	1.859	2.62661	0.0370351	0.198339
	1035	0.817011	0.753229	0.932084	1.09694	0.783467	0.812203	0.874147	0.918629	1.09601	1.10506	0.428684	0.689501	0.79329	0.81334	3.24508	4.58178	14.1494	0.059611	-0.813682
	1036	0.825424	0.720763	0.935632	1.07961	0.740205	0.82233	0.78825	0.943683	1.20412	1.26965	-2.27577	2.15654	0.31929	1.71105	2.80841	3.61225	19.3286	0.0329545	0.776097
	1037	0.826841	0.744114	0.938595	1.09565	0.770744	0.802048	0.775784	0.937764	1.21541	1.01351	-0.587582	1.74268	0.4096	1.11506	3.07716	7.26052	10.9944	0.0976749	0.264494
	1038	0.8324	0.753742	0.935766	1.08356	0.777435	0.843389	0.835744	0.942534	1.15387	1.09961	1.80742	1.02577	0.506303	1.62421	2.38949	3.36756	17.9863	0.0963207	0.728969
	1039	0.828994	0.774122	0.928842	1.07681	0.799857	0.803334	0.848156	0.92041	1.12931	1.13197	-2.88967	0.68639	2.24868	1.74596	2.96618	2.8988	12.73	0.0362088	-1.23846
	1040	0.820419	0.777682	0.935308	1.10353	0.814199	0.813511	0.85495	0.923866	1.12346	0.906324	-3.3794	1.06987	1.17451	0.95799	2.82602	8.03866	3.99007	0.0117601	-1.15212
	1041	0.846402	0.774967	0.932306	1.05047	0.791408	0.833527	0.810855	0.943393	1.18048	1.23985	-1.06462	1.10333	0.82136	2.40709	1.73545	4.70205	15.7148	0.0343454	0.484277
	1042	0.831047	0.776678	0.933837	1.08719	0.805339	0.861281	0.911485	0.928373	0.947996	1.26553	-0.512076	0.772486	0.333464	2.60609	2.13548	11.4514	3.22752	0.0406914	0.834858
	1043	0.810992	0.734087	0.935611	1.10688	0.765182	0.850399	0.861815	0.940513	1.12472	0.984693	-2.98663	0.900109	0.491771	2.03203	2.93186	8.13559	17.0809	0.0865433	0.0385544
	1044	0.812513	0.719711	0.937068	1.10341	0.747201	0.84499	0.800581	0.950846	1.19327	0.931872	-3.62549	1.35242	0.411926	0.382815	2.70467	16.3635	17.1843	0.0029597	0.264337
	1045	0.840677	0.791522	0.929642	1.06257	0.813996	0.826581	0.867102	0.927653	1.11148	1.13423	-2.55983	0.954652	1.98992	1.2825	1.53392	5.80668	19.7256	0.0999639	-0.75475
	1046	0.834023	0.770978	0.936976	1.08926	0.798726	0.870462	0.868917	0.948776	1.12066	0.908445	1.13804	1.12997	0.792879	0.718171	1.50058	12.3832	8.24989	0.0116109	0.131845
	1047	0.831943	0.741918	0.933797	1.07309	0.761503	0.810336	0.814723	0.931891	1.1723	1.25722	-3.54548	1.55746	0.553363	1.42261	2.57376	14.7021	19.2379	0.0881348	-0.299797
	1048	0.828518	0.746639	0.936497	1.08905	0.771461	0.802829	0.676214	0.964646	1.32185	0.89238	-1.65007	1.25344	1.54138	0.985798	2.79034	3.15711	18.8697	0.0107314	-0.561199
	1049	0.834896	0.771956	0.93566	1.08501	0.798411	0.862846	0.81276	0.956053	1.18201	0.926079	-0.575905	0.67969	2.02934	0.679581	2.49762	8.61694	14.593	0.0194656	0.0943743
	1050	0.807662	0.732169	0.938822	1.11621	0.766577	0.859119	0.913864	0.935004	1.05652	0.909488	-0.218086	0.853683	0.334556	1.5355	2.14556	10.56	13.517	0.0641	0.848724
	1051	0.833023	0.767807	0.935094	1.0853	0.79403	0.829969	0.915353	0.915453	1.00412	1.3247	3.67653	1.09233	0.394658	1.21694	2.41284	2.84143	7.8403	0.0912872	0.139429
	1052	0.825542	0.73352	0.934403	1.08293	0.755397	0.810894	0.825476	0.929591	1.15969	1.21324	-3.18307	1.73549	0.478511	1.64898	2.75017	17.8666	12.3851	0.0436701	-0.554072
	1053	0.821421	0.72275	0.928039	1.06338	0.739862	0.804926	0.824791	0.926914	1.15924	1.62524	2.913	1.3953	0.49629	0.914467	3.5385	17.2509	15.6929	0.00703714	-1.17963
	1054	0.833012	0.790546	0.929652	1.07634	0.81808	0.812497	0.900945	0.904244	0.974647	1.18165	1.14123	0.918793	0.740534	1.07535	1.35733	17.3476	8.49406	0.0875167	-0.3183
	1055	0.832792	0.778692	0.930317	1.07582	0.804111	0.803866	0.842974	0.921933	1.13624	1.10596	-2.00239	0.801065	2.69385	0.649478	2.65131	3.45221	16.9586	0.0369398	-1.33644
	1056	0.830575	0.750244	0.930185	1.0684	0.770163	0.826682	0.913785	0.914067	1.00698	1.62464	-1.78807	0.81157	0.569517	2.05596	2.65845	2.32384	18.0603	0.0809496	-0.779771
	1057	0.839834	0.787295	0.934902	1.07912	0.813597	0.856484	0.82474	0.950723	1.16819	0.905606	2.18242	1.33583	1.40861	1.45756	1.05919	8.3591	13.6502	0.0754393	-0.120616
	1058	0.843291	0.801357	0.930647	1.06356	0.825044	0.813714	0.907318	0.908289	1.01338	1.32275	-3.33456	0.91896	0.612792	0.681438	2.12803	4.45381	4.43626	0.0255606	0.0392012
	1059	0.841237	0.784713	0.929256	1.05709	0.804847	0.817686	0.877352	0.920747	1.0936	1.41872	-2.12643	0.638738	0.848629	1.8449	2.74586	19.7175	9.5847	0.073623	-0.0766022
	1060	0.84608	0.771277	0.937768	1.07162	0.791886	0.801757	0.705468	0.956129	1.29125	0.969658	-1.3146	2.133	1.4508	2.28457	1.50339	11.4144	11.1122	0.0823361	-1.22394
	1061	0.84716	0.79969	0.931282	1.05695	0.820673	0.813941	0.84713	0.925944	1.13373	1.18491	-3.45984	1.11604	0.93766	2.71403	1.77674	1.03669	10.1092	0.0940096	0.192459
	1062	0.842035	0.780557	0.929179	1.05227	0.798985	0.824695	0.859309	0.928463	1.12115	1.3148	3.30954	0.879639	1.08413	2.04676	1.88316	7.34251	15.4188	0.0384778	-0.312165
	1063	0.827148	0.764425	0.93369	1.08957	0.792454	0.824461	0.813483	0.938635	1.17613	0.997773	-0.543213	0.673065	1.39978	1.09226	3.01775	19.793	11.6383	0.0329679	-0.442817
	1064	0.849849	0.791797	0.930847	1.04211	0.808184	0.818206	0.805839	0.937597	1.18386	1.26038	-1.31316	1.02377	1.15158	1.36392	1.64015	12.1224	16.7982	0.0603255	0.365405
	1065	0.841694	0.78135	0.937459	1.08164	0.807045	0.841474	0.839996	0.940707	1.14861	0.922094	1.77685	1.6333	0.602649	1.11697	1.34066	2.43025	5.63438	0.0172214	0.510548
	1066	0.838927	0.755953	0.93088	1.0523	0.771864	0.8165	0.79533	0.939341	1.19547	1.33455	3.52122	1.18039	0.717889	1.03796	2.35118	7.3517	15.4427	0.00462372	-0.16834
	1067	0.848976	0.801543	0.937959	1.07592	0.827454	0.812295	0.728696	0.954206	1.26741	0.895366	-2.13554	1.36537	2.21316	1.90073	1.69713	16.0848	9.91954	0.0927182	-0.0686488
	1068	0.827911	0.751845	0.932823	1.08237	0.775763	0.873898	0.868122	0.950569	1.12226	1.05023	0.31638	0.959076	0.760359	0.40389	2.11936	17.3735	16.9539	0.0026283	-0.237527
	1069	0.822429	0.761404	0.935309	1.09873	0.792648	0.833196	0.808284	0.943816	1.1833	0.936541	2.71132	0.92579	0.790788	2.11836	3.16906	10.9358	5.63786	0.0064279	-0.325257
	1070	0.814609	0.724835	0.935027	1.09802	0.75123	0.822786	0.762738	0.950052	1.23194	1.00874	1.02999	0.996098	0.391813	2.32688	3.24462	17.5722	17.9096	0.0580402	0.97457
	1071	0.83944	0.757341	0.936364	1.0741	0.777868	0.84552	0.813511	0.948199	1.17915	1.03152	-0.922177	1.62024	0.624895	2.62102	1.46683	6.36901	12.0196	0.0250513	0.175679
	1072	0.831437	0.814836	0.932528	1.0878	0.851591	0.843976	0.909999	0.927351	1.05313	0.885679	1.25676	0.97485	0.90937	1.31523	1.89931	16.7359	1.21318	0.01649	0.495293
	1073	0.843892	0.768799	0.934011	1.06169	0.787177	0.861674	0.922404	0.934563	1.0417	1.41637	1.65222	1.48553	0.399724	1.69701	1.62727	6.85014	6.78508	0.0167478	0.474296
	1074	0.831883	0.758101	0.936425	1.08756	0.78365	0.853246	0.860796	0.942089	1.12659	1.04735	-1.42596	1.01086	0.546829	1.56874	2.33914	5.86494	8.97637	0.0202194	0.270322
	1075	0.839393	0.780669	0.928625	1.05723	0.800661	0.810252	0.898174	0.910837	1.04918	1.54719	-2.40777	0.769784	0.65639	2.13394	2.83931	10.7556	5.18991	0.022672	-0.599969
	1076	0.817539	0.76418	0.93297	1.10034	0.797391	0.865272	0.932734	0.933351	1.00908	0.945737	-0.514216	0.639254	1.43439	1.0146	1.83536	18.6564	9.9495	0.0201137	-0.831211
	1077	0.826571	0.824974	0.928806	1.08532	0.864776	0.808839	0.851329	0.922389	1.1268	0.90171	-1.76335	0.610631	2.56261	1.33323	3.44583	16.0566	1.59093	0.0816825	0.518063
	1078	0.820026	0.739206	0.933278	1.09138	0.765029	0.815855	0.89873	0.914104	1.05364	1.24478	1.29169	1.09975	0.540873	1.38695	2.57755	6.32002	12.1114	0.0301097	-1.1174
	1079	0.825579	0.747225	0.933937	1.08738	0.772194	0.840441	0.890748	0.929719	1.08365	1.17901	-0.628618	0.979308	0.565712	2.39852	2.44101	2.98365	15.4059	0.0563588	-0.353803
	1080	0.816689	0.7175	0.930515	1.07946	0.737962	0.808596	0.820154	0.929775	1.16557	1.39979	-2.2911	1.65702	0.432871	1.27398	3.47454	8.35868	15.2533	0.0187233	-0.836202
	1081	0.845654	0.800693	0.928107	1.04694	0.820137	0.806699	0.787346	0.936917	1.20308	1.26984	-3.40109	0.757685	1.15539	1.65673	3.15154	11.5226	4.71009	0.006423	0.0961913
	1082	0.809821	0.765931	0.935327	1.11333	0.805679	0.802967	0.901277	0.904148	1.02364	0.954647	-1.38449	1.00084	0.530133	1.58796	2.85162	11.9178	3.18017	0.062905	-0.595243
	1083	0.83756	0.769413	0.934901	1.07796	0.792984	0.81402	0.890529	0.915517	1.06962	1.26863	1.43606	1.01149	0.456972	0.910775	2.14516	7.351	11.1939	0.0903877	0.568605
	1084	0.837577	0.781133	0.938025	1.08898	0.809883	0.831935	0.76524	0.953244	1.23006	0.887769	-0.42824	1.31128	2.14051	1.27841	2.00543	1.55949	13.4627	0.0532589	-0.743296
	1085	0.83376	0.75437	0.934559	1.07806	0.776485	0.845779	0.907027	0.929072	1.06011	1.3647	-2.39427	0.991702	0.442991	1.05879	2.61882	6.93787	12.592	0.0597545	0.118608
	1086	0.840114	0.774441	0.929202	1.05432	0.792845	0.822248	0.884545	0.921484	1.08465	1.29551	2.62304	1.44375	0.770551	1.81687	1.13238	3.64392	16.5351	0.0639115	-0.364468
	1087	0.827995	0.735876	0.93665	1.08594	0.758415	0.855357	0.923563	0.926464	0.979139	1.56142	3.17442	1.48799	0.315397	0.520121	2.26599	12.4949	13.8336	0.0348664	-0.389123
	1088	0.834173	0.805857	0.929793	1.07723	0.836298	0.814319	0.879387	0.918425	1.08884	1.02782	3.31638	1.11542	1.98029	2.19719	1.51722	3.43303	8.27603	0.091965	-1.09595
	1089	0.830105	0.745635	0.933621	1.07815	0.767215	0.840948	0.909764	0.918179	0.96195	1.57906	-2.74797	0.98549	0.432069	0.796207	2.25134	8.67435	18.7294	0.0826676	-0.505803
	1090	0.818541	0.714136	0.934622	1.08578	0.735263	0.854148	0.894478	0.936094	1.08397	1.39934	-2.18876	1.93094	0.343845	2.41772	2.56533	5.0529	19.7935	0.0272784	-0.414312
	1091	0.817795	0.745313	0.933433	1.09681	0.774031	0.802655	0.696473	0.958972	1.30074	0.88514	3.03783	0.772732	1.18436	1.97323	3.62046	3.87404	16.747	0.0263963	0.150672
	1092	0.845728	0.793072	0.934473	1.06924	0.816339	0.825293	0.764087	0.950696	1.2307	0.988328	1.08394	0.825976	2.88543	1.65738	2.17924	19.4146	15.6505	0.0778676	0.105164
	1093	0.827261	0.737866	0.931708	1.07377	0.757907	0.831298	0.772193	0.951362	1.22255	1.15731	0.516444	0.994118	0.622246	1.23223	3.03642	15.3418	16.486	0.00275234	0.0561922
	1094	0.841264	0.765318	0.936002	1.07292	0.786312	0.805418	0.804414	0.932187	1.18345	1.17683	-0.584565	1.3191	0.481841	1.88752	2.50973	1.74251	11.6361	0.0971243	0.852417
	1095	0.82486	0.765362	0.928786	1.08098	0.791613	0.801451	0.865483	0.91514	1.10437	1.48565	2.46511	0.845602	0.38249	0.732829	4.36881	4.24354	5.16604	0.0929245	0.203299
	1096	0.831677	0.772006	0.935597	1.0895	0.800444	0.818545	0.908989	0.909063	0.996315	1.1633	-1.17858	1.27812	0.431183	1.20504	1.91409	19.9927	4.89813	0.0657952	-0.0813754
	1097	0.813459	0.712478	0.935813	1.09631	0.736803	0.851926	0.835775	0.946461	1.15525	1.11755	-1.81681	1.6365	0.359085	1.4145	2.8209	9.05893	15.6827	0.0101901	-0.123432
	1098	0.821678	0.745178	0.934014	1.09271	0.771999	0.82408	0.910966	0.911402	0.991199	1.42209	-2.29814	0.917157	0.377556	1.03415	2.96537	17.543	8.07935	0.0534532	-0.543368
	1099	0.842748	0.767855	0.930617	1.04785	0.783696	0.847444	0.864739	0.938497	1.12047	1.61406	2.79017	0.772329	0.578895	1.65538	2.82957	4.76216	10.0288	0.0130698	0.150049
	1100	0.84043	0.781177	0.931863	1.06724	0.803228	0.839711	0.731472	0.964735	1.2662	0.974351	0.537681	1.0036	2.52677	0.752004	2.56336	14.9315	19.1045	0.00120076	-0.180538
	1101	0.840811	0.75609	0.936538	1.07124	0.775523	0.857279	0.920986	0.932392	1.04089	1.55303	1.22198	1.44849	0.304885	1.99694	2.1485	16.8917	8.13092	0.0543131	0.85615
	1102	0.842304	0.784302	0.931874	1.06452	0.805778	0.838272	0.820546	0.943351	1.17028	1.08849	-2.2178	0.679342	2.59408	1.08232	2.33991	8.93682	19.3108	0.0490144	-0.125813
	1103	0.838338	0.822762	0.929145	1.07073	0.853745	0.810405	0.904044	0.908339	1.02839	1.01433	-2.27829	1.40622	0.700467	1.07421	1.28745	11.1608	1.42368	0.0471888	0.471946
	1104	0.82635	0.771544	0.933059	1.09078	0.80133	0.817472	0.870363	0.922346	1.10381	1.16999	1.12695	1.07375	0.335999	2.00036	3.85954	11.5115	1.48202	0.0414746	0.781651
	1105	0.837916	0.809188	0.93313	1.08068	0.840538	0.811316	0.836093	0.927191	1.14685	0.976256	1.38591	1.32203	2.99777	0.69138	1.64526	15.3558	8.84141	0.0870619	-1.45192
	1106	0.827555	0.797999	0.930696	1.08759	0.831687	0.828743	0.900064	0.911466	0.953644	1.07787	2.66132	1.12815	0.426186	1.69082	1.94525	4.41377	1.52282	0.0343634	0.54106
	1107	0.836925	0.763374	0.933387	1.07227	0.784751	0.827851	0.798905	0.943568	1.19302	1.17128	2.35464	0.85623	0.681604	2.05068	2.76769	11.6906	14.8485	0.0673569	0.473409
	1108	0.833496	0.769464	0.926821	1.05912	0.789532	0.810973	0.902414	0.909578	1.0367	1.40347	3.52696	0.752519	1.15424	1.2269	1.94143	13.2569	16.4555	0.0272277	-1.24574
	1109	0.816293	0.727146	0.932979	1.09168	0.751903	0.833048	0.83508	0.937851	1.15276	1.15322	1.56401	1.67534	0.512936	1.28972	3.2056	14.3522	13.907	0.00130654	-1.34535
	1110	0.843725	0.776465	0.929865	1.04731	0.793093	0.80526	0.798751	0.933417	1.18992	1.25342	-1.06086	1.10189	1.4859	1.32962	1.79724	9.28274	19.7517	0.0262803	-0.632879
	1111	0.822811	0.740292	0.932078	1.08436	0.763954	0.847695	0.842827	0.943004	1.14647	1.05569	1.07176	1.0547	1.29696	1.34641	2.05178	19.7811	18.1822	0.00734493	-1.4123
	1112	0.84008	0.827291	0.927172	1.0624	0.856368	0.814771	0.86233	0.922781	1.11397	1.07643	-1.46818	1.07654	2.31709	1.49626	2.37569	8.21111	3.23356	0.00275147	-0.981775
	1113	0.843091	0.778251	0.929716	1.05012	0.795744	0.83367	0.888591	0.92661	1.08382	1.45853	-1.34979	0.784598	0.804404	1.92061	2.20562	4.81722	12.7307	0.0368756	-0.112077
	1114	0.830747	0.776285	0.936542	1.09373	0.807033	0.842601	0.810302	0.947538	1.1823	0.897501	-3.66301	1.00284	2.64355	0.718486	2.25162	11.7945	19.5182	0.0982964	-0.840343
	1115	0.828194	0.800436	0.93243	1.09081	0.83564	0.812827	0.887255	0.915599	1.07475	0.980227	3.10643	0.683161	1.40515	0.883422	2.5393	5.75878	6.63215	0.0642304	-0.301565
	1116	0.810367	0.712904	0.937582	1.10477	0.740094	0.836662	0.855427	0.935189	1.12923	1.10821	-0.410975	2.22499	0.322046	1.47633	2.93982	1.59014	13.9179	0.0365904	-0.431805
	1117	0.818101	0.730593	0.93169	1.08703	0.754359	0.854181	0.907879	0.924597	0.947078	1.39304	-3.03163	0.944593	0.436283	1.4088	1.78101	15.6206	18.8021	0.0296029	-0.68923
	1118	0.82065	0.735543	0.935799	1.0951	0.761732	0.85494	0.920248	0.931195	1.04033	1.1485	-1.48744	1.61335	0.394789	1.15047	2.13471	6.01075	8.40042	0.00561115	-0.679149
	1119	0.84562	0.796845	0.932858	1.06521	0.819692	0.853607	0.834888	0.947356	1.1565	1.02653	-1.77146	0.738225	2.2289	1.85838	1.75161	19.0775	14.3482	0.0761634	0.319598
	1120	0.82679	0.741043	0.933855	1.08271	0.763691	0.882112	0.913649	0.947106	1.06825	1.39668	-3.52351	0.823857	0.335379	1.79173	3.08901	5.55048	8.20131	0.00755811	0.336885
	1121	0.807607	0.742833	0.936084	1.11359	0.778311	0.832299	0.911711	0.919929	1.0372	0.963154	1.22496	1.0437	0.656541	1.76397	2.25649	4.61882	9.65396	0.0365317	-1.22923
	1122	0.805134	0.746133	0.935849	1.11634	0.78367	0.801763	0.900312	0.900471	0.994369	1.05485	1.66542	1.39752	0.342661	2.2921	3.04186	16.646	2.66426	0.0720581	-0.66244
	1123	0.809638	0.763397	0.935619	1.11376	0.802782	0.810226	0.895051	0.911894	1.05702	0.934306	-2.87399	1.28901	0.345687	1.65439	3.63661	3.5217	1.479	0.0450584	0.201246
	1124	0.842281	0.791798	0.932078	1.06772	0.815205	0.807999	0.834661	0.925992	1.14785	1.16348	-3.36675	0.852878	0.852909	1.67126	2.56103	16.9625	7.05984	0.0655183	0.226514
	1125	0.832375	0.760783	0.936352	1.08744	0.786629	0.801767	0.734841	0.948271	1.26006	0.973191	2.49063	1.02215	0.731151	1.11419	2.9859	11.7402	15.4826	0.0880875	0.451174
	1126	0.834505	0.771431	0.932117	1.07591	0.795368	0.805786	0.714957	0.955208	1.2815	0.989789	2.90174	0.595872	2.01631	2.41828	3.44987	17.8812	9.18615	0.0177295	0.304442
	1127	0.826117	0.761109	0.935117	1.09349	0.789956	0.869395	0.817429	0.957997	1.17767	0.899114	1.88509	1.11976	2.49478	2.02729	1.85663	4.76705	15.4698	0.0195172	-1.13668
	1128	0.838065	0.814286	0.920393	1.03477	0.835855	0.875388	0.893584	0.94692	1.09223	1.20442	3.54937	0.743205	2.47833	1.37686	1.31177	1.35419	9.67663	0.00197702	0.233859
	1129	0.802553	0.714784	0.933213	1.10665	0.744045	0.842585	0.784606	0.953353	1.21028	0.997094	3.08746	1.07998	0.377868	1.92362	3.74273	11.5926	11.1698	0.0044525	0.110269
	1130	0.822059	0.753162	0.932571	1.09118	0.780754	0.800626	0.705119	0.955779	1.29155	0.918686	0.779146	0.810647	2.44132	1.96948	3.53392	14.8564	11.2929	0.0121637	-0.637998
	1131	0.810452	0.777637	0.932177	1.10812	0.817915	0.827318	0.913703	0.91522	1.01611	0.910338	-1.83053	0.585647	2.26351	1.37786	2.58373	9.73719	9.22002	0.0968466	-0.992484
	1132	0.813198	0.719858	0.932665	1.09258	0.744314	0.868785	0.917728	0.939408	1.05565	1.52991	-3.56999	0.81123	0.305171	1.66353	3.53479	14.0976	15.666	0.048859	0.0599026
	1133	0.813943	0.717533	0.933287	1.09186	0.741353	0.871471	0.911304	0.941979	1.06709	1.44614	2.15202	0.820438	0.340132	2.64412	3.10465	16.073	18.9989	0.0362782	-0.0380255
	1134	0.849731	0.820413	0.92629	1.02983	0.838976	0.800714	0.870655	0.913424	1.0961	1.54019	2.67532	0.748584	1.0708	1.21642	2.15819	4.6595	8.5806	0.0975144	0.432737
	1135	0.824698	0.77045	0.931424	1.08902	0.799836	0.812846	0.8636	0.921503	1.11155	1.08913	-2.26998	0.661455	0.910576	1.23662	3.22334	1.24365	11.2818	0.0729931	-0.377267
	1136	0.80342	0.721825	0.937559	1.11601	0.755	0.851592	0.914665	0.930585	1.04964	0.941424	-0.901386	1.65991	0.488338	2.14683	1.99034	7.60242	8.36421	0.0100353	-1.44809
	1137	0.829799	0.753202	0.932388	1.07841	0.775967	0.822479	0.848138	0.92988	1.1347	1.14813	2.95771	1.19585	0.907744	0.892437	2.20725	12.115	11.7512	0.00580549	-1.33219
	1138	0.839055	0.766698	0.931856	1.0639	0.786216	0.85168	0.799737	0.953887	1.19488	1.06625	-1.82912	0.911459	1.52567	1.23098	1.94706	3.37941	19.5779	0.00768311	-0.104666
	1139	0.83392	0.784906	0.93473	1.08688	0.814372	0.849583	0.774001	0.958754	1.2222	0.89114	-2.60222	0.998166	1.19102	2.35521	3.03722	9.40228	6.39374	0.00179071	0.113335
	1140	0.835096	0.750537	0.930145	1.05649	0.767275	0.813608	0.857471	0.923358	1.12017	1.58223	-0.879906	1.03361	0.626065	1.61526	2.84195	11.3008	19.8247	0.0652587	-0.476197
	1141	0.839407	0.76887	0.933391	1.06963	0.789913	0.848594	0.768423	0.959578	1.22802	1.00357	-2.98187	0.731023	2.31162	1.94018	2.35461	14.1738	18.7115	0.0247169	0.159184
	1142	0.809074	0.71177	0.933856	1.09801	0.737139	0.825756	0.821188	0.93752	1.16754	1.17481	-3.58326	2.04382	0.333732	1.37587	3.40046	9.8201	13.7704	0.0349633	-0.283155
	1143	0.83828	0.779858	0.936246	1.08334	0.806475	0.831845	0.876378	0.928388	1.10077	0.986515	-2.16087	1.36826	0.54143	1.46277	1.4199	10.3441	8.1207	0.0985139	0.722086
	1144	0.833285	0.774698	0.936149	1.08916	0.803188	0.838703	0.838348	0.939723	1.14999	0.953355	2.22799	1.01506	1.13885	1.52178	1.97953	7.70561	11.2933	0.0443583	-0.396574
	1145	0.841174	0.793667	0.936771	1.08317	0.822072	0.804529	0.815323	0.928981	1.17048	0.96077	0.227523	1.98418	0.877219	2.22245	2.19993	1.95469	2.34083	0.0943026	-0.890566
	1146	0.842075	0.774729	0.935137	1.07234	0.796758	0.817706	0.710875	0.961103	1.2865	0.957382	0.53843	0.851168	2.46651	0.556413	2.69765	11.981	17.5246	0.0179915	0.167028
[truncated: 371 more rows]

## Sheet: WholeMRB
COMPROMISE SOLUTIONS
[truncated: 173 more rows]
